# Supplementary material for: Climate change and tree cover loss affect the habitat suitability of Cedrela angustifolia: evaluating climate vulnerability and conservation in Andean montane forests
Source: PeerJ. 2025 Feb 27;13:e18799. doi: 10.7717/peerj.18799 (PMC11874945; doi:10.7717/peerj.18799)
Supplement: Supplemental Information 3 [file peerj-13-18799-s003.xlsx]

## Sheet: Cedrela_angus
N	Species	longitude	Latitude
1	Cedrela angustifolia	-65.6976	-28.0621
2	Cedrela angustifolia	-65.719	-28.0505
3	Cedrela angustifolia	-65.5	-27
4	Cedrela angustifolia	-65.3494	-26.9711
5	Cedrela angustifolia	-65.2261	-26.8389
6	Cedrela angustifolia	-64.83	-26.51
7	Cedrela angustifolia	-65.6	-25.15
8	Cedrela angustifolia	-64.2172	-23.3653
9	Cedrela angustifolia	-64.5	-22.3333
10	Cedrela angustifolia	-64.2728	-21.0928
11	Cedrela angustifolia	-64.3408	-21.0603
12	Cedrela angustifolia	-64.3744	-20.8303
13	Cedrela angustifolia	-64.305	-20.711
14	Cedrela angustifolia	-64.333	-20.7
15	Cedrela angustifolia	-64.312	-20.699
16	Cedrela angustifolia	-63.9297	-20.4003
17	Cedrela angustifolia	-64.0431	-20.3392
18	Cedrela angustifolia	-64.478	-19.7497
19	Cedrela angustifolia	-63.9158	-19.7286
20	Cedrela angustifolia	-63.8958	-19.5783
21	Cedrela angustifolia	-64.2	-19.3833
22	Cedrela angustifolia	-65.2633	-19.1481
23	Cedrela angustifolia	-64.2647	-19.0408
24	Cedrela angustifolia	-64.3375	-19.0136
25	Cedrela angustifolia	-64.3336	-19.0081
26	Cedrela angustifolia	-63.8861	-18.8114
27	Cedrela angustifolia	-64.0347	-18.7861
28	Cedrela angustifolia	-64.1061	-18.5739
29	Cedrela angustifolia	-64.1044	-18.5733
30	Cedrela angustifolia	-63.9583	-18.5417
31	Cedrela angustifolia	-64.0853	-18.518
32	Cedrela angustifolia	-64.2578	-18.4311
33	Cedrela angustifolia	-63.6583	-18.3264
34	Cedrela angustifolia	-63.6667	-18.2333
35	Cedrela angustifolia	-63.8	-18.1
36	Cedrela angustifolia	-63.9153	-18.095
37	Cedrela angustifolia	-63.5728	-18.0928
38	Cedrela angustifolia	-63.9189	-18.0703
39	Cedrela angustifolia	-63.9311	-18.0678
40	Cedrela angustifolia	-64.4	-17.95
41	Cedrela angustifolia	-64.2833	-17.9181
42	Cedrela angustifolia	-64.4833	-17.9
43	Cedrela angustifolia	-64.4333	-17.8833
44	Cedrela angustifolia	-64.2667	-17.8833
45	Cedrela angustifolia	-64.25	-17.8667
46	Cedrela angustifolia	-64.5333	-17.85
47	Cedrela angustifolia	-64.5483	-17.8461
48	Cedrela angustifolia	-64.6739	-17.8286
49	Cedrela angustifolia	-64.5347	-17.818
50	Cedrela angustifolia	-65.502	-17.2354
51	Cedrela angustifolia	-66.85	-17.05
52	Cedrela angustifolia	-66.2189	-16.9242
53	Cedrela angustifolia	-66.1672	-16.7364
54	Cedrela angustifolia	-68.1175	-16.5035
55	Cedrela angustifolia	-68.7478	-15.2397
56	Cedrela angustifolia	-73.25	-14.05
57	Cedrela angustifolia	-72.8606	-13.3925
58	Cedrela angustifolia	-72.1167	-13.3
59	Cedrela angustifolia	-74.1694	-13.073
60	Cedrela angustifolia	-72.45	-13.0667
61	Cedrela angustifolia	-75.4297	-10.9919
62	Cedrela angustifolia	-78.8356	-7.34556
63	Cedrela angustifolia	-79.2669	-5.68138
64	Cedrela angustifolia	-79.4	-5.13
65	Cedrela angustifolia	-78.8917	-5.09944
66	Cedrela angustifolia	-79.25	-4.41667
67	Cedrela angustifolia	-79.2644	-3.94777
68	Cedrela angustifolia	-79.15	-3.91666
69	Cedrela angustifolia	-79.4203	-3.83027
70	Cedrela angustifolia	-78.8679	-2.84755
71	Cedrela angustifolia	-78.1869	-1.4628
72	Cedrela angustifolia	-75.06	-12.3994
73	Cedrela angustifolia	-75.8042	-10.9764
74	Cedrela angustifolia	-79.4167	-3.81667
75	Cedrela angustifolia	-79.25	-3.93333
76	Cedrela angustifolia	-78.8833	-5.08333
77	Cedrela angustifolia	-79.2667	-5.66667
78	Cedrela angustifolia	-78.8333	-7.33333
79	Cedrela angustifolia	-77.75	-9.13333
80	Cedrela angustifolia	-75.4167	-10.9833
81	Cedrela angustifolia	-73.6667	-11.0833
82	Cedrela angustifolia	-74.0167	-11.3833
83	Cedrela angustifolia	-74.2667	-11.8333
84	Cedrela angustifolia	-72.3333	-12.4833
85	Cedrela angustifolia	-72.1167	-13.3
86	Cedrela angustifolia	-72.85	-13.3833
87	Cedrela angustifolia	-71.9667	-13.5
88	Cedrela angustifolia	-64.6667	-17.8167
89	Cedrela angustifolia	-64.5333	-17.8333
90	Cedrela angustifolia	-64.25	-18.4167
91	Cedrela angustifolia	-63.95	-18.5333
92	Cedrela angustifolia	-64.0167	-18.6
93	Cedrela angustifolia	-63.8833	-18.8
94	Cedrela angustifolia	-63.9167	-20.4
95	Cedrela angustifolia	-64.2667	-21.0833
96	Cedrela angustifolia	-77.5376	-5.28764
97	Cedrela angustifolia	-77.7543	-7.38764
98	Cedrela angustifolia	-68.296	-14.0293
99	Cedrela angustifolia	-71.8793	-12.5876
100	Cedrela angustifolia	-77.771	-8.64597
101	Cedrela angustifolia	-74.171	-13.8876
102	Cedrela angustifolia	-79.2043	-5.26264
103	Cedrela angustifolia	-78.221	-3.11264
104	Cedrela angustifolia	-66.6043	-17.521
