# Supplementary material for: Climate change and tree cover loss affect the habitat suitability of Cedrela angustifolia: evaluating climate vulnerability and conservation in Andean montane forests
Source: PeerJ. 2025 Feb 27;13:e18799. doi: 10.7717/peerj.18799 (PMC11874945; doi:10.7717/peerj.18799)
Supplement: Supplemental Information 4 [file peerj-13-18799-s004.xlsx]

## Sheet: Legend
Legend
x	predicted value of deforestation
y	habitat suitability percentage (probability of occurrence)

## Sheet: def_countries
Countries	Present		2040				2070				2100
			ssp370		ssp585		ssp370		ssp585		ssp370		ssp585
	value_def	range_prob	value_def	range_prob	value_def	range_prob	value_def	range_prob	value_def	range_prob	value_def	range_prob	value_def	range_prob
Ecuador	1.5206	60-80	1.5206	60-80	1.5206	60-80	1.5206	60-80	1.5206	60-80	1.5206	60-80	1.5206	60-80
Peru	14.5453	60-80	56.0651	60-80	55	60-80	57.5118	60-80	55	60-80	34.4732	60-80	57.3945	60-80
Bolivia	0.2753	80-100	0	80-100	0.2753	80-100	0.1652	80-100	0.9674	80-100	0	80-100	0	80-100
	22.7928	60-80	4.019	60-80	29.2342	60-80	1.8719	60-80	23.004	60-80	1.7618	60-80	1.5206	60-80
Argentina	8.9189	60-80	55	60-40	55	60-40	55	60-40	55	60-40	8.9189	60-80	55	60-40

## Sheet: def_argentina
Argentina	actual period		2040_ssp370		2040_ssp585		2070_ssp370		2070_ssp585		2100_ssp370		2100_ssp585
	x	y	x	y	x	y	x	y	x	y	x	y	x	y
1	0	0.676334	0	0.588736	0	0.588736	0	0.588736	0	0.588736	0	0.637903	0	0.588736
2	0.022022	0.676334	0.022022	0.588736	0.022022	0.588736	0.022022	0.588736	0.022022	0.588736	0.022022	0.637903	0.022022	0.588736
3	0.044044	0.676334	0.044044	0.588736	0.044044	0.588736	0.044044	0.588736	0.044044	0.588736	0.044044	0.637903	0.044044	0.588736
4	0.0660661	0.676334	0.0660661	0.588736	0.0660661	0.588736	0.0660661	0.588736	0.0660661	0.588736	0.0660661	0.637903	0.0660661	0.588736
5	0.0880881	0.676334	0.0880881	0.588736	0.0880881	0.588736	0.0880881	0.588736	0.0880881	0.588736	0.0880881	0.637903	0.0880881	0.588736
6	0.11011	0.676334	0.11011	0.588736	0.11011	0.588736	0.11011	0.588736	0.11011	0.588736	0.11011	0.637903	0.11011	0.588736
7	0.132132	0.676334	0.132132	0.588736	0.132132	0.588736	0.132132	0.588736	0.132132	0.588736	0.132132	0.637903	0.132132	0.588736
8	0.154154	0.676334	0.154154	0.588736	0.154154	0.588736	0.154154	0.588736	0.154154	0.588736	0.154154	0.637903	0.154154	0.588736
9	0.176176	0.676334	0.176176	0.588736	0.176176	0.588736	0.176176	0.588736	0.176176	0.588736	0.176176	0.637903	0.176176	0.588736
10	0.198198	0.676334	0.198198	0.588736	0.198198	0.588736	0.198198	0.588736	0.198198	0.588736	0.198198	0.637903	0.198198	0.588736
11	0.22022	0.676334	0.22022	0.588736	0.22022	0.588736	0.22022	0.588736	0.22022	0.588736	0.22022	0.637903	0.22022	0.588736
12	0.242242	0.676334	0.242242	0.588736	0.242242	0.588736	0.242242	0.588736	0.242242	0.588736	0.242242	0.637903	0.242242	0.588736
13	0.264264	0.676334	0.264264	0.588736	0.264264	0.588736	0.264264	0.588736	0.264264	0.588736	0.264264	0.637903	0.264264	0.588736
14	0.286286	0.676334	0.286286	0.588736	0.286286	0.588736	0.286286	0.588736	0.286286	0.588736	0.286286	0.637903	0.286286	0.588736
15	0.308308	0.676334	0.308308	0.588736	0.308308	0.588736	0.308308	0.588736	0.308308	0.588736	0.308308	0.637903	0.308308	0.588736
16	0.33033	0.676334	0.33033	0.588736	0.33033	0.588736	0.33033	0.588736	0.33033	0.588736	0.33033	0.637903	0.33033	0.588736
17	0.352352	0.676334	0.352352	0.588736	0.352352	0.588736	0.352352	0.588736	0.352352	0.588736	0.352352	0.637903	0.352352	0.588736
18	0.374374	0.676334	0.374374	0.588736	0.374374	0.588736	0.374374	0.588736	0.374374	0.588736	0.374374	0.637903	0.374374	0.588736
19	0.396396	0.676334	0.396396	0.588736	0.396396	0.588736	0.396396	0.588736	0.396396	0.588736	0.396396	0.637903	0.396396	0.588736
20	0.418418	0.676334	0.418418	0.588736	0.418418	0.588736	0.418418	0.588736	0.418418	0.588736	0.418418	0.637903	0.418418	0.588736
21	0.44044	0.676334	0.44044	0.588736	0.44044	0.588736	0.44044	0.588736	0.44044	0.588736	0.44044	0.637903	0.44044	0.588736
22	0.462462	0.676334	0.462462	0.588736	0.462462	0.588736	0.462462	0.588736	0.462462	0.588736	0.462462	0.637903	0.462462	0.588736
23	0.484484	0.676334	0.484484	0.588736	0.484484	0.588736	0.484484	0.588736	0.484484	0.588736	0.484484	0.637903	0.484484	0.588736
24	0.506507	0.676334	0.506507	0.588736	0.506507	0.588736	0.506507	0.588736	0.506507	0.588736	0.506507	0.637903	0.506507	0.588736
25	0.528529	0.676334	0.528529	0.588736	0.528529	0.588736	0.528529	0.588736	0.528529	0.588736	0.528529	0.637903	0.528529	0.588736
26	0.550551	0.676334	0.550551	0.588736	0.550551	0.588736	0.550551	0.588736	0.550551	0.588736	0.550551	0.637903	0.550551	0.588736
27	0.572573	0.676334	0.572573	0.588736	0.572573	0.588736	0.572573	0.588736	0.572573	0.588736	0.572573	0.637903	0.572573	0.588736
28	0.594595	0.676334	0.594595	0.588736	0.594595	0.588736	0.594595	0.588736	0.594595	0.588736	0.594595	0.637903	0.594595	0.588736
29	0.616617	0.676334	0.616617	0.588736	0.616617	0.588736	0.616617	0.588736	0.616617	0.588736	0.616617	0.637903	0.616617	0.588736
30	0.638639	0.676334	0.638639	0.588736	0.638639	0.588736	0.638639	0.588736	0.638639	0.588736	0.638639	0.637903	0.638639	0.588736
31	0.660661	0.676334	0.660661	0.588736	0.660661	0.588736	0.660661	0.588736	0.660661	0.588736	0.660661	0.637903	0.660661	0.588736
32	0.682683	0.676334	0.682683	0.588736	0.682683	0.588736	0.682683	0.588736	0.682683	0.588736	0.682683	0.637903	0.682683	0.588736
33	0.704705	0.676334	0.704705	0.588736	0.704705	0.588736	0.704705	0.588736	0.704705	0.588736	0.704705	0.637903	0.704705	0.588736
34	0.726727	0.676334	0.726727	0.588736	0.726727	0.588736	0.726727	0.588736	0.726727	0.588736	0.726727	0.637903	0.726727	0.588736
35	0.748749	0.676334	0.748749	0.588736	0.748749	0.588736	0.748749	0.588736	0.748749	0.588736	0.748749	0.637903	0.748749	0.588736
36	0.770771	0.676334	0.770771	0.588736	0.770771	0.588736	0.770771	0.588736	0.770771	0.588736	0.770771	0.637903	0.770771	0.588736
37	0.792793	0.676334	0.792793	0.588736	0.792793	0.588736	0.792793	0.588736	0.792793	0.588736	0.792793	0.637903	0.792793	0.588736
38	0.814815	0.676334	0.814815	0.588736	0.814815	0.588736	0.814815	0.588736	0.814815	0.588736	0.814815	0.637903	0.814815	0.588736
39	0.836837	0.676334	0.836837	0.588736	0.836837	0.588736	0.836837	0.588736	0.836837	0.588736	0.836837	0.637903	0.836837	0.588736
40	0.858859	0.676334	0.858859	0.588736	0.858859	0.588736	0.858859	0.588736	0.858859	0.588736	0.858859	0.637903	0.858859	0.588736
41	0.880881	0.676334	0.880881	0.588736	0.880881	0.588736	0.880881	0.588736	0.880881	0.588736	0.880881	0.637903	0.880881	0.588736
42	0.902903	0.676334	0.902903	0.588736	0.902903	0.588736	0.902903	0.588736	0.902903	0.588736	0.902903	0.637903	0.902903	0.588736
43	0.924925	0.676334	0.924925	0.588736	0.924925	0.588736	0.924925	0.588736	0.924925	0.588736	0.924925	0.637903	0.924925	0.588736
44	0.946947	0.676334	0.946947	0.588736	0.946947	0.588736	0.946947	0.588736	0.946947	0.588736	0.946947	0.637903	0.946947	0.588736
45	0.968969	0.676334	0.968969	0.588736	0.968969	0.588736	0.968969	0.588736	0.968969	0.588736	0.968969	0.637903	0.968969	0.588736
46	0.990991	0.676334	0.990991	0.588736	0.990991	0.588736	0.990991	0.588736	0.990991	0.588736	0.990991	0.637903	0.990991	0.588736
47	1.01301	0.676334	1.01301	0.588736	1.01301	0.588736	1.01301	0.588736	1.01301	0.588736	1.01301	0.637903	1.01301	0.588736
48	1.03504	0.676334	1.03504	0.588736	1.03504	0.588736	1.03504	0.588736	1.03504	0.588736	1.03504	0.637903	1.03504	0.588736
49	1.05706	0.676334	1.05706	0.588736	1.05706	0.588736	1.05706	0.588736	1.05706	0.588736	1.05706	0.637903	1.05706	0.588736
50	1.07908	0.676334	1.07908	0.588736	1.07908	0.588736	1.07908	0.588736	1.07908	0.588736	1.07908	0.637903	1.07908	0.588736
51	1.1011	0.676334	1.1011	0.588736	1.1011	0.588736	1.1011	0.588736	1.1011	0.588736	1.1011	0.637903	1.1011	0.588736
52	1.12312	0.676334	1.12312	0.588736	1.12312	0.588736	1.12312	0.588736	1.12312	0.588736	1.12312	0.637903	1.12312	0.588736
53	1.14515	0.676334	1.14515	0.588736	1.14515	0.588736	1.14515	0.588736	1.14515	0.588736	1.14515	0.637903	1.14515	0.588736
54	1.16717	0.676334	1.16717	0.588736	1.16717	0.588736	1.16717	0.588736	1.16717	0.588736	1.16717	0.637903	1.16717	0.588736
55	1.18919	0.676334	1.18919	0.588736	1.18919	0.588736	1.18919	0.588736	1.18919	0.588736	1.18919	0.637903	1.18919	0.588736
56	1.21121	0.676334	1.21121	0.588736	1.21121	0.588736	1.21121	0.588736	1.21121	0.588736	1.21121	0.637903	1.21121	0.588736
57	1.23323	0.676334	1.23323	0.588736	1.23323	0.588736	1.23323	0.588736	1.23323	0.588736	1.23323	0.637903	1.23323	0.588736
58	1.25526	0.676334	1.25526	0.588736	1.25526	0.588736	1.25526	0.588736	1.25526	0.588736	1.25526	0.637903	1.25526	0.588736
59	1.27728	0.676334	1.27728	0.588736	1.27728	0.588736	1.27728	0.588736	1.27728	0.588736	1.27728	0.637903	1.27728	0.588736
60	1.2993	0.676334	1.2993	0.588736	1.2993	0.588736	1.2993	0.588736	1.2993	0.588736	1.2993	0.637903	1.2993	0.588736
61	1.32132	0.676334	1.32132	0.588736	1.32132	0.588736	1.32132	0.588736	1.32132	0.588736	1.32132	0.637903	1.32132	0.588736
62	1.34334	0.676334	1.34334	0.588736	1.34334	0.588736	1.34334	0.588736	1.34334	0.588736	1.34334	0.637903	1.34334	0.588736
63	1.36537	0.676334	1.36537	0.588736	1.36537	0.588736	1.36537	0.588736	1.36537	0.588736	1.36537	0.637903	1.36537	0.588736
64	1.38739	0.676334	1.38739	0.588736	1.38739	0.588736	1.38739	0.588736	1.38739	0.588736	1.38739	0.637903	1.38739	0.588736
65	1.40941	0.676334	1.40941	0.588736	1.40941	0.588736	1.40941	0.588736	1.40941	0.588736	1.40941	0.637903	1.40941	0.588736
66	1.43143	0.676334	1.43143	0.588736	1.43143	0.588736	1.43143	0.588736	1.43143	0.588736	1.43143	0.637903	1.43143	0.588736
67	1.45345	0.676334	1.45345	0.588736	1.45345	0.588736	1.45345	0.588736	1.45345	0.588736	1.45345	0.637903	1.45345	0.588736
68	1.47548	0.676334	1.47548	0.588736	1.47548	0.588736	1.47548	0.588736	1.47548	0.588736	1.47548	0.637903	1.47548	0.588736
69	1.4975	0.676334	1.4975	0.588736	1.4975	0.588736	1.4975	0.588736	1.4975	0.588736	1.4975	0.637903	1.4975	0.588736
70	1.51952	0.676334	1.51952	0.588736	1.51952	0.588736	1.51952	0.588736	1.51952	0.588736	1.51952	0.637903	1.51952	0.588736
71	1.54154	0.676334	1.54154	0.588736	1.54154	0.588736	1.54154	0.588736	1.54154	0.588736	1.54154	0.637903	1.54154	0.588736
72	1.56356	0.676334	1.56356	0.588736	1.56356	0.588736	1.56356	0.588736	1.56356	0.588736	1.56356	0.637903	1.56356	0.588736
73	1.58559	0.676334	1.58559	0.588736	1.58559	0.588736	1.58559	0.588736	1.58559	0.588736	1.58559	0.637903	1.58559	0.588736
74	1.60761	0.676334	1.60761	0.588736	1.60761	0.588736	1.60761	0.588736	1.60761	0.588736	1.60761	0.637903	1.60761	0.588736
75	1.62963	0.676334	1.62963	0.588736	1.62963	0.588736	1.62963	0.588736	1.62963	0.588736	1.62963	0.637903	1.62963	0.588736
76	1.65165	0.676334	1.65165	0.588736	1.65165	0.588736	1.65165	0.588736	1.65165	0.588736	1.65165	0.637903	1.65165	0.588736
77	1.67367	0.676334	1.67367	0.588736	1.67367	0.588736	1.67367	0.588736	1.67367	0.588736	1.67367	0.637903	1.67367	0.588736
78	1.6957	0.676334	1.6957	0.588736	1.6957	0.588736	1.6957	0.588736	1.6957	0.588736	1.6957	0.637903	1.6957	0.588736
79	1.71772	0.676334	1.71772	0.588736	1.71772	0.588736	1.71772	0.588736	1.71772	0.588736	1.71772	0.637903	1.71772	0.588736
80	1.73974	0.676334	1.73974	0.588736	1.73974	0.588736	1.73974	0.588736	1.73974	0.588736	1.73974	0.637903	1.73974	0.588736
81	1.76176	0.676334	1.76176	0.588736	1.76176	0.588736	1.76176	0.588736	1.76176	0.588736	1.76176	0.637903	1.76176	0.588736
82	1.78378	0.676334	1.78378	0.588736	1.78378	0.588736	1.78378	0.588736	1.78378	0.588736	1.78378	0.637903	1.78378	0.588736
83	1.80581	0.676334	1.80581	0.588736	1.80581	0.588736	1.80581	0.588736	1.80581	0.588736	1.80581	0.637903	1.80581	0.588736
84	1.82783	0.676334	1.82783	0.588736	1.82783	0.588736	1.82783	0.588736	1.82783	0.588736	1.82783	0.637903	1.82783	0.588736
85	1.84985	0.676334	1.84985	0.588736	1.84985	0.588736	1.84985	0.588736	1.84985	0.588736	1.84985	0.637903	1.84985	0.588736
86	1.87187	0.676334	1.87187	0.588736	1.87187	0.588736	1.87187	0.588736	1.87187	0.588736	1.87187	0.637903	1.87187	0.588736
87	1.89389	0.676334	1.89389	0.588736	1.89389	0.588736	1.89389	0.588736	1.89389	0.588736	1.89389	0.637903	1.89389	0.588736
88	1.91592	0.676334	1.91592	0.588736	1.91592	0.588736	1.91592	0.588736	1.91592	0.588736	1.91592	0.637903	1.91592	0.588736
89	1.93794	0.676334	1.93794	0.588736	1.93794	0.588736	1.93794	0.588736	1.93794	0.588736	1.93794	0.637903	1.93794	0.588736
90	1.95996	0.676334	1.95996	0.588736	1.95996	0.588736	1.95996	0.588736	1.95996	0.588736	1.95996	0.637903	1.95996	0.588736
91	1.98198	0.676334	1.98198	0.588736	1.98198	0.588736	1.98198	0.588736	1.98198	0.588736	1.98198	0.637903	1.98198	0.588736
92	2.004	0.676334	2.004	0.588736	2.004	0.588736	2.004	0.588736	2.004	0.588736	2.004	0.637903	2.004	0.588736
93	2.02603	0.676334	2.02603	0.588736	2.02603	0.588736	2.02603	0.588736	2.02603	0.588736	2.02603	0.637903	2.02603	0.588736
94	2.04805	0.676334	2.04805	0.588736	2.04805	0.588736	2.04805	0.588736	2.04805	0.588736	2.04805	0.637903	2.04805	0.588736
95	2.07007	0.676334	2.07007	0.588736	2.07007	0.588736	2.07007	0.588736	2.07007	0.588736	2.07007	0.637903	2.07007	0.588736
96	2.09209	0.676334	2.09209	0.588736	2.09209	0.588736	2.09209	0.588736	2.09209	0.588736	2.09209	0.637903	2.09209	0.588736
97	2.11411	0.676334	2.11411	0.588736	2.11411	0.588736	2.11411	0.588736	2.11411	0.588736	2.11411	0.637903	2.11411	0.588736
98	2.13614	0.676334	2.13614	0.588736	2.13614	0.588736	2.13614	0.588736	2.13614	0.588736	2.13614	0.637903	2.13614	0.588736
99	2.15816	0.676334	2.15816	0.588736	2.15816	0.588736	2.15816	0.588736	2.15816	0.588736	2.15816	0.637903	2.15816	0.588736
100	2.18018	0.676334	2.18018	0.588736	2.18018	0.588736	2.18018	0.588736	2.18018	0.588736	2.18018	0.637903	2.18018	0.588736
101	2.2022	0.676334	2.2022	0.588736	2.2022	0.588736	2.2022	0.588736	2.2022	0.588736	2.2022	0.637903	2.2022	0.588736
102	2.22422	0.676334	2.22422	0.588736	2.22422	0.588736	2.22422	0.588736	2.22422	0.588736	2.22422	0.637903	2.22422	0.588736
103	2.24625	0.676334	2.24625	0.588736	2.24625	0.588736	2.24625	0.588736	2.24625	0.588736	2.24625	0.637903	2.24625	0.588736
104	2.26827	0.676334	2.26827	0.588736	2.26827	0.588736	2.26827	0.588736	2.26827	0.588736	2.26827	0.637903	2.26827	0.588736
105	2.29029	0.676334	2.29029	0.588736	2.29029	0.588736	2.29029	0.588736	2.29029	0.588736	2.29029	0.637903	2.29029	0.588736
106	2.31231	0.676334	2.31231	0.588736	2.31231	0.588736	2.31231	0.588736	2.31231	0.588736	2.31231	0.637903	2.31231	0.588736
107	2.33433	0.676334	2.33433	0.588736	2.33433	0.588736	2.33433	0.588736	2.33433	0.588736	2.33433	0.637903	2.33433	0.588736
108	2.35636	0.676334	2.35636	0.588736	2.35636	0.588736	2.35636	0.588736	2.35636	0.588736	2.35636	0.637903	2.35636	0.588736
109	2.37838	0.676334	2.37838	0.588736	2.37838	0.588736	2.37838	0.588736	2.37838	0.588736	2.37838	0.637903	2.37838	0.588736
110	2.4004	0.676334	2.4004	0.588736	2.4004	0.588736	2.4004	0.588736	2.4004	0.588736	2.4004	0.637903	2.4004	0.588736
111	2.42242	0.676334	2.42242	0.588736	2.42242	0.588736	2.42242	0.588736	2.42242	0.588736	2.42242	0.637903	2.42242	0.588736
112	2.44444	0.676334	2.44444	0.588736	2.44444	0.588736	2.44444	0.588736	2.44444	0.588736	2.44444	0.637903	2.44444	0.588736
113	2.46647	0.676334	2.46647	0.588736	2.46647	0.588736	2.46647	0.588736	2.46647	0.588736	2.46647	0.637903	2.46647	0.588736
114	2.48849	0.676334	2.48849	0.588736	2.48849	0.588736	2.48849	0.588736	2.48849	0.588736	2.48849	0.637903	2.48849	0.588736
115	2.51051	0.676334	2.51051	0.588736	2.51051	0.588736	2.51051	0.588736	2.51051	0.588736	2.51051	0.637903	2.51051	0.588736
116	2.53253	0.676334	2.53253	0.588736	2.53253	0.588736	2.53253	0.588736	2.53253	0.588736	2.53253	0.637903	2.53253	0.588736
117	2.55455	0.676334	2.55455	0.588736	2.55455	0.588736	2.55455	0.588736	2.55455	0.588736	2.55455	0.637903	2.55455	0.588736
118	2.57658	0.676334	2.57658	0.588736	2.57658	0.588736	2.57658	0.588736	2.57658	0.588736	2.57658	0.637903	2.57658	0.588736
119	2.5986	0.676334	2.5986	0.588736	2.5986	0.588736	2.5986	0.588736	2.5986	0.588736	2.5986	0.637903	2.5986	0.588736
120	2.62062	0.676334	2.62062	0.588736	2.62062	0.588736	2.62062	0.588736	2.62062	0.588736	2.62062	0.637903	2.62062	0.588736
121	2.64264	0.676334	2.64264	0.588736	2.64264	0.588736	2.64264	0.588736	2.64264	0.588736	2.64264	0.637903	2.64264	0.588736
122	2.66466	0.676334	2.66466	0.588736	2.66466	0.588736	2.66466	0.588736	2.66466	0.588736	2.66466	0.637903	2.66466	0.588736
123	2.68669	0.676334	2.68669	0.588736	2.68669	0.588736	2.68669	0.588736	2.68669	0.588736	2.68669	0.637903	2.68669	0.588736
124	2.70871	0.676334	2.70871	0.588736	2.70871	0.588736	2.70871	0.588736	2.70871	0.588736	2.70871	0.637903	2.70871	0.588736
125	2.73073	0.676334	2.73073	0.588736	2.73073	0.588736	2.73073	0.588736	2.73073	0.588736	2.73073	0.637903	2.73073	0.588736
126	2.75275	0.676334	2.75275	0.588736	2.75275	0.588736	2.75275	0.588736	2.75275	0.588736	2.75275	0.637903	2.75275	0.588736
127	2.77477	0.676334	2.77477	0.588736	2.77477	0.588736	2.77477	0.588736	2.77477	0.588736	2.77477	0.637903	2.77477	0.588736
128	2.7968	0.676334	2.7968	0.588736	2.7968	0.588736	2.7968	0.588736	2.7968	0.588736	2.7968	0.637903	2.7968	0.588736
129	2.81882	0.676334	2.81882	0.588736	2.81882	0.588736	2.81882	0.588736	2.81882	0.588736	2.81882	0.637903	2.81882	0.588736
130	2.84084	0.676334	2.84084	0.588736	2.84084	0.588736	2.84084	0.588736	2.84084	0.588736	2.84084	0.637903	2.84084	0.588736
131	2.86286	0.676334	2.86286	0.588736	2.86286	0.588736	2.86286	0.588736	2.86286	0.588736	2.86286	0.637903	2.86286	0.588736
132	2.88488	0.676334	2.88488	0.588736	2.88488	0.588736	2.88488	0.588736	2.88488	0.588736	2.88488	0.637903	2.88488	0.588736
133	2.90691	0.676334	2.90691	0.588736	2.90691	0.588736	2.90691	0.588736	2.90691	0.588736	2.90691	0.637903	2.90691	0.588736
134	2.92893	0.676334	2.92893	0.588736	2.92893	0.588736	2.92893	0.588736	2.92893	0.588736	2.92893	0.637903	2.92893	0.588736
135	2.95095	0.676334	2.95095	0.588736	2.95095	0.588736	2.95095	0.588736	2.95095	0.588736	2.95095	0.637903	2.95095	0.588736
136	2.97297	0.676334	2.97297	0.588736	2.97297	0.588736	2.97297	0.588736	2.97297	0.588736	2.97297	0.637903	2.97297	0.588736
137	2.99499	0.676334	2.99499	0.588736	2.99499	0.588736	2.99499	0.588736	2.99499	0.588736	2.99499	0.637903	2.99499	0.588736
138	3.01702	0.676334	3.01702	0.588736	3.01702	0.588736	3.01702	0.588736	3.01702	0.588736	3.01702	0.637903	3.01702	0.588736
139	3.03904	0.676334	3.03904	0.588736	3.03904	0.588736	3.03904	0.588736	3.03904	0.588736	3.03904	0.637903	3.03904	0.588736
140	3.06106	0.676334	3.06106	0.588736	3.06106	0.588736	3.06106	0.588736	3.06106	0.588736	3.06106	0.637903	3.06106	0.588736
141	3.08308	0.676334	3.08308	0.588736	3.08308	0.588736	3.08308	0.588736	3.08308	0.588736	3.08308	0.637903	3.08308	0.588736
142	3.10511	0.676334	3.10511	0.588736	3.10511	0.588736	3.10511	0.588736	3.10511	0.588736	3.10511	0.637903	3.10511	0.588736
143	3.12713	0.676334	3.12713	0.588736	3.12713	0.588736	3.12713	0.588736	3.12713	0.588736	3.12713	0.637903	3.12713	0.588736
144	3.14915	0.676334	3.14915	0.588736	3.14915	0.588736	3.14915	0.588736	3.14915	0.588736	3.14915	0.637903	3.14915	0.588736
145	3.17117	0.676334	3.17117	0.588736	3.17117	0.588736	3.17117	0.588736	3.17117	0.588736	3.17117	0.637903	3.17117	0.588736
146	3.19319	0.676334	3.19319	0.588736	3.19319	0.588736	3.19319	0.588736	3.19319	0.588736	3.19319	0.637903	3.19319	0.588736
147	3.21522	0.676334	3.21522	0.588736	3.21522	0.588736	3.21522	0.588736	3.21522	0.588736	3.21522	0.637903	3.21522	0.588736
148	3.23724	0.676334	3.23724	0.588736	3.23724	0.588736	3.23724	0.588736	3.23724	0.588736	3.23724	0.637903	3.23724	0.588736
149	3.25926	0.676334	3.25926	0.588736	3.25926	0.588736	3.25926	0.588736	3.25926	0.588736	3.25926	0.637903	3.25926	0.588736
150	3.28128	0.676334	3.28128	0.588736	3.28128	0.588736	3.28128	0.588736	3.28128	0.588736	3.28128	0.637903	3.28128	0.588736
151	3.3033	0.676334	3.3033	0.588736	3.3033	0.588736	3.3033	0.588736	3.3033	0.588736	3.3033	0.637903	3.3033	0.588736
152	3.32533	0.676334	3.32533	0.588736	3.32533	0.588736	3.32533	0.588736	3.32533	0.588736	3.32533	0.637903	3.32533	0.588736
153	3.34735	0.676334	3.34735	0.588736	3.34735	0.588736	3.34735	0.588736	3.34735	0.588736	3.34735	0.637903	3.34735	0.588736
154	3.36937	0.676334	3.36937	0.588736	3.36937	0.588736	3.36937	0.588736	3.36937	0.588736	3.36937	0.637903	3.36937	0.588736
155	3.39139	0.676334	3.39139	0.588736	3.39139	0.588736	3.39139	0.588736	3.39139	0.588736	3.39139	0.637903	3.39139	0.588736
156	3.41341	0.676334	3.41341	0.588736	3.41341	0.588736	3.41341	0.588736	3.41341	0.588736	3.41341	0.637903	3.41341	0.588736
157	3.43544	0.676334	3.43544	0.588736	3.43544	0.588736	3.43544	0.588736	3.43544	0.588736	3.43544	0.637903	3.43544	0.588736
158	3.45746	0.676334	3.45746	0.588736	3.45746	0.588736	3.45746	0.588736	3.45746	0.588736	3.45746	0.637903	3.45746	0.588736
159	3.47948	0.676334	3.47948	0.588736	3.47948	0.588736	3.47948	0.588736	3.47948	0.588736	3.47948	0.637903	3.47948	0.588736
160	3.5015	0.676334	3.5015	0.588736	3.5015	0.588736	3.5015	0.588736	3.5015	0.588736	3.5015	0.637903	3.5015	0.588736
161	3.52352	0.676334	3.52352	0.588736	3.52352	0.588736	3.52352	0.588736	3.52352	0.588736	3.52352	0.637903	3.52352	0.588736
162	3.54555	0.676334	3.54555	0.588736	3.54555	0.588736	3.54555	0.588736	3.54555	0.588736	3.54555	0.637903	3.54555	0.588736
163	3.56757	0.676334	3.56757	0.588736	3.56757	0.588736	3.56757	0.588736	3.56757	0.588736	3.56757	0.637903	3.56757	0.588736
164	3.58959	0.588736	3.58959	0.498291	3.58959	0.498291	3.58959	0.498291	3.58959	0.498291	3.58959	0.539904	3.58959	0.498291
165	3.61161	0.588736	3.61161	0.498291	3.61161	0.498291	3.61161	0.498291	3.61161	0.498291	3.61161	0.539904	3.61161	0.498291
166	3.63363	0.588736	3.63363	0.498291	3.63363	0.498291	3.63363	0.498291	3.63363	0.498291	3.63363	0.539904	3.63363	0.498291
167	3.65566	0.588736	3.65566	0.498291	3.65566	0.498291	3.65566	0.498291	3.65566	0.498291	3.65566	0.539904	3.65566	0.498291
168	3.67768	0.588736	3.67768	0.498291	3.67768	0.498291	3.67768	0.498291	3.67768	0.498291	3.67768	0.539904	3.67768	0.498291
169	3.6997	0.588736	3.6997	0.498291	3.6997	0.498291	3.6997	0.498291	3.6997	0.498291	3.6997	0.539904	3.6997	0.498291
170	3.72172	0.588736	3.72172	0.498291	3.72172	0.498291	3.72172	0.498291	3.72172	0.498291	3.72172	0.539904	3.72172	0.498291
171	3.74374	0.588736	3.74374	0.498291	3.74374	0.498291	3.74374	0.498291	3.74374	0.498291	3.74374	0.539904	3.74374	0.498291
172	3.76577	0.588736	3.76577	0.498291	3.76577	0.498291	3.76577	0.498291	3.76577	0.498291	3.76577	0.539904	3.76577	0.498291
173	3.78779	0.588736	3.78779	0.498291	3.78779	0.498291	3.78779	0.498291	3.78779	0.498291	3.78779	0.539904	3.78779	0.498291
174	3.80981	0.588736	3.80981	0.498291	3.80981	0.498291	3.80981	0.498291	3.80981	0.498291	3.80981	0.539904	3.80981	0.498291
175	3.83183	0.588736	3.83183	0.498291	3.83183	0.498291	3.83183	0.498291	3.83183	0.498291	3.83183	0.539904	3.83183	0.498291
176	3.85385	0.588736	3.85385	0.498291	3.85385	0.498291	3.85385	0.498291	3.85385	0.498291	3.85385	0.539904	3.85385	0.498291
177	3.87588	0.588736	3.87588	0.498291	3.87588	0.498291	3.87588	0.498291	3.87588	0.498291	3.87588	0.539904	3.87588	0.498291
178	3.8979	0.588736	3.8979	0.498291	3.8979	0.498291	3.8979	0.498291	3.8979	0.498291	3.8979	0.539904	3.8979	0.498291
179	3.91992	0.588736	3.91992	0.498291	3.91992	0.498291	3.91992	0.498291	3.91992	0.498291	3.91992	0.539904	3.91992	0.498291
180	3.94194	0.588736	3.94194	0.498291	3.94194	0.498291	3.94194	0.498291	3.94194	0.498291	3.94194	0.539904	3.94194	0.498291
181	3.96396	0.588736	3.96396	0.498291	3.96396	0.498291	3.96396	0.498291	3.96396	0.498291	3.96396	0.539904	3.96396	0.498291
182	3.98599	0.588736	3.98599	0.498291	3.98599	0.498291	3.98599	0.498291	3.98599	0.498291	3.98599	0.539904	3.98599	0.498291
183	4.00801	0.588736	4.00801	0.498291	4.00801	0.498291	4.00801	0.498291	4.00801	0.498291	4.00801	0.539904	4.00801	0.498291
184	4.03003	0.588736	4.03003	0.498291	4.03003	0.498291	4.03003	0.498291	4.03003	0.498291	4.03003	0.539904	4.03003	0.498291
185	4.05205	0.588736	4.05205	0.498291	4.05205	0.498291	4.05205	0.498291	4.05205	0.498291	4.05205	0.539904	4.05205	0.498291
186	4.07407	0.588736	4.07407	0.498291	4.07407	0.498291	4.07407	0.498291	4.07407	0.498291	4.07407	0.539904	4.07407	0.498291
187	4.0961	0.588736	4.0961	0.498291	4.0961	0.498291	4.0961	0.498291	4.0961	0.498291	4.0961	0.539904	4.0961	0.498291
188	4.11812	0.588736	4.11812	0.498291	4.11812	0.498291	4.11812	0.498291	4.11812	0.498291	4.11812	0.539904	4.11812	0.498291
189	4.14014	0.588736	4.14014	0.498291	4.14014	0.498291	4.14014	0.498291	4.14014	0.498291	4.14014	0.539904	4.14014	0.498291
190	4.16216	0.588736	4.16216	0.498291	4.16216	0.498291	4.16216	0.498291	4.16216	0.498291	4.16216	0.539904	4.16216	0.498291
191	4.18418	0.588736	4.18418	0.498291	4.18418	0.498291	4.18418	0.498291	4.18418	0.498291	4.18418	0.539904	4.18418	0.498291
192	4.20621	0.588736	4.20621	0.498291	4.20621	0.498291	4.20621	0.498291	4.20621	0.498291	4.20621	0.539904	4.20621	0.498291
193	4.22823	0.588736	4.22823	0.498291	4.22823	0.498291	4.22823	0.498291	4.22823	0.498291	4.22823	0.539904	4.22823	0.498291
194	4.25025	0.588736	4.25025	0.498291	4.25025	0.498291	4.25025	0.498291	4.25025	0.498291	4.25025	0.539904	4.25025	0.498291
195	4.27227	0.588736	4.27227	0.498291	4.27227	0.498291	4.27227	0.498291	4.27227	0.498291	4.27227	0.539904	4.27227	0.498291
196	4.29429	0.588736	4.29429	0.498291	4.29429	0.498291	4.29429	0.498291	4.29429	0.498291	4.29429	0.539904	4.29429	0.498291
197	4.31632	0.588736	4.31632	0.498291	4.31632	0.498291	4.31632	0.498291	4.31632	0.498291	4.31632	0.539904	4.31632	0.498291
198	4.33834	0.588736	4.33834	0.498291	4.33834	0.498291	4.33834	0.498291	4.33834	0.498291	4.33834	0.539904	4.33834	0.498291
199	4.36036	0.588736	4.36036	0.498291	4.36036	0.498291	4.36036	0.498291	4.36036	0.498291	4.36036	0.539904	4.36036	0.498291
200	4.38238	0.588736	4.38238	0.498291	4.38238	0.498291	4.38238	0.498291	4.38238	0.498291	4.38238	0.539904	4.38238	0.498291
201	4.4044	0.588736	4.4044	0.498291	4.4044	0.498291	4.4044	0.498291	4.4044	0.498291	4.4044	0.539904	4.4044	0.498291
202	4.42643	0.588736	4.42643	0.498291	4.42643	0.498291	4.42643	0.498291	4.42643	0.498291	4.42643	0.539904	4.42643	0.498291
203	4.44845	0.588736	4.44845	0.498291	4.44845	0.498291	4.44845	0.498291	4.44845	0.498291	4.44845	0.539904	4.44845	0.498291
204	4.47047	0.588736	4.47047	0.498291	4.47047	0.498291	4.47047	0.498291	4.47047	0.498291	4.47047	0.539904	4.47047	0.498291
205	4.49249	0.588736	4.49249	0.498291	4.49249	0.498291	4.49249	0.498291	4.49249	0.498291	4.49249	0.539904	4.49249	0.498291
206	4.51451	0.588736	4.51451	0.498291	4.51451	0.498291	4.51451	0.498291	4.51451	0.498291	4.51451	0.539904	4.51451	0.498291
207	4.53654	0.588736	4.53654	0.498291	4.53654	0.498291	4.53654	0.498291	4.53654	0.498291	4.53654	0.539904	4.53654	0.498291
208	4.55856	0.588736	4.55856	0.498291	4.55856	0.498291	4.55856	0.498291	4.55856	0.498291	4.55856	0.539904	4.55856	0.498291
209	4.58058	0.588736	4.58058	0.498291	4.58058	0.498291	4.58058	0.498291	4.58058	0.498291	4.58058	0.539904	4.58058	0.498291
210	4.6026	0.588736	4.6026	0.498291	4.6026	0.498291	4.6026	0.498291	4.6026	0.498291	4.6026	0.539904	4.6026	0.498291
211	4.62462	0.588736	4.62462	0.498291	4.62462	0.498291	4.62462	0.498291	4.62462	0.498291	4.62462	0.539904	4.62462	0.498291
212	4.64665	0.588736	4.64665	0.498291	4.64665	0.498291	4.64665	0.498291	4.64665	0.498291	4.64665	0.539904	4.64665	0.498291
213	4.66867	0.588736	4.66867	0.498291	4.66867	0.498291	4.66867	0.498291	4.66867	0.498291	4.66867	0.539904	4.66867	0.498291
214	4.69069	0.588736	4.69069	0.498291	4.69069	0.498291	4.69069	0.498291	4.69069	0.498291	4.69069	0.539904	4.69069	0.498291
215	4.71271	0.588736	4.71271	0.498291	4.71271	0.498291	4.71271	0.498291	4.71271	0.498291	4.71271	0.539904	4.71271	0.498291
216	4.73473	0.588736	4.73473	0.498291	4.73473	0.498291	4.73473	0.498291	4.73473	0.498291	4.73473	0.539904	4.73473	0.498291
217	4.75676	0.588736	4.75676	0.498291	4.75676	0.498291	4.75676	0.498291	4.75676	0.498291	4.75676	0.539904	4.75676	0.498291
218	4.77878	0.588736	4.77878	0.498291	4.77878	0.498291	4.77878	0.498291	4.77878	0.498291	4.77878	0.539904	4.77878	0.498291
219	4.8008	0.588736	4.8008	0.498291	4.8008	0.498291	4.8008	0.498291	4.8008	0.498291	4.8008	0.539904	4.8008	0.498291
220	4.82282	0.588736	4.82282	0.498291	4.82282	0.498291	4.82282	0.498291	4.82282	0.498291	4.82282	0.539904	4.82282	0.498291
221	4.84484	0.588736	4.84484	0.498291	4.84484	0.498291	4.84484	0.498291	4.84484	0.498291	4.84484	0.539904	4.84484	0.498291
222	4.86687	0.588736	4.86687	0.498291	4.86687	0.498291	4.86687	0.498291	4.86687	0.498291	4.86687	0.539904	4.86687	0.498291
223	4.88889	0.588736	4.88889	0.498291	4.88889	0.498291	4.88889	0.498291	4.88889	0.498291	4.88889	0.539904	4.88889	0.498291
224	4.91091	0.588736	4.91091	0.498291	4.91091	0.498291	4.91091	0.498291	4.91091	0.498291	4.91091	0.539904	4.91091	0.498291
225	4.93293	0.588736	4.93293	0.498291	4.93293	0.498291	4.93293	0.498291	4.93293	0.498291	4.93293	0.539904	4.93293	0.498291
226	4.95495	0.588736	4.95495	0.498291	4.95495	0.498291	4.95495	0.498291	4.95495	0.498291	4.95495	0.539904	4.95495	0.498291
227	4.97698	0.588736	4.97698	0.498291	4.97698	0.498291	4.97698	0.498291	4.97698	0.498291	4.97698	0.539904	4.97698	0.498291
228	4.999	0.588736	4.999	0.498291	4.999	0.498291	4.999	0.498291	4.999	0.498291	4.999	0.539904	4.999	0.498291
229	5.02102	0.588736	5.02102	0.498291	5.02102	0.498291	5.02102	0.498291	5.02102	0.498291	5.02102	0.539904	5.02102	0.498291
230	5.04304	0.588736	5.04304	0.498291	5.04304	0.498291	5.04304	0.498291	5.04304	0.498291	5.04304	0.539904	5.04304	0.498291
231	5.06507	0.588736	5.06507	0.498291	5.06507	0.498291	5.06507	0.498291	5.06507	0.498291	5.06507	0.539904	5.06507	0.498291
232	5.08709	0.588736	5.08709	0.498291	5.08709	0.498291	5.08709	0.498291	5.08709	0.498291	5.08709	0.539904	5.08709	0.498291
233	5.10911	0.588736	5.10911	0.498291	5.10911	0.498291	5.10911	0.498291	5.10911	0.498291	5.10911	0.539904	5.10911	0.498291
234	5.13113	0.588736	5.13113	0.498291	5.13113	0.498291	5.13113	0.498291	5.13113	0.498291	5.13113	0.539904	5.13113	0.498291
235	5.15315	0.588736	5.15315	0.498291	5.15315	0.498291	5.15315	0.498291	5.15315	0.498291	5.15315	0.539904	5.15315	0.498291
236	5.17518	0.588736	5.17518	0.498291	5.17518	0.498291	5.17518	0.498291	5.17518	0.498291	5.17518	0.539904	5.17518	0.498291
237	5.1972	0.588736	5.1972	0.498291	5.1972	0.498291	5.1972	0.498291	5.1972	0.498291	5.1972	0.539904	5.1972	0.498291
238	5.21922	0.588736	5.21922	0.498291	5.21922	0.498291	5.21922	0.498291	5.21922	0.498291	5.21922	0.539904	5.21922	0.498291
239	5.24124	0.588736	5.24124	0.498291	5.24124	0.498291	5.24124	0.498291	5.24124	0.498291	5.24124	0.539904	5.24124	0.498291
240	5.26326	0.588736	5.26326	0.498291	5.26326	0.498291	5.26326	0.498291	5.26326	0.498291	5.26326	0.539904	5.26326	0.498291
241	5.28529	0.588736	5.28529	0.498291	5.28529	0.498291	5.28529	0.498291	5.28529	0.498291	5.28529	0.539904	5.28529	0.498291
242	5.30731	0.588736	5.30731	0.498291	5.30731	0.498291	5.30731	0.498291	5.30731	0.498291	5.30731	0.539904	5.30731	0.498291
243	5.32933	0.588736	5.32933	0.498291	5.32933	0.498291	5.32933	0.498291	5.32933	0.498291	5.32933	0.539904	5.32933	0.498291
244	5.35135	0.588736	5.35135	0.498291	5.35135	0.498291	5.35135	0.498291	5.35135	0.498291	5.35135	0.539904	5.35135	0.498291
245	5.37337	0.588736	5.37337	0.498291	5.37337	0.498291	5.37337	0.498291	5.37337	0.498291	5.37337	0.539904	5.37337	0.498291
246	5.3954	0.588736	5.3954	0.498291	5.3954	0.498291	5.3954	0.498291	5.3954	0.498291	5.3954	0.539904	5.3954	0.498291
247	5.41742	0.588736	5.41742	0.498291	5.41742	0.498291	5.41742	0.498291	5.41742	0.498291	5.41742	0.539904	5.41742	0.498291
248	5.43944	0.588736	5.43944	0.498291	5.43944	0.498291	5.43944	0.498291	5.43944	0.498291	5.43944	0.539904	5.43944	0.498291
249	5.46146	0.588736	5.46146	0.498291	5.46146	0.498291	5.46146	0.498291	5.46146	0.498291	5.46146	0.539904	5.46146	0.498291
250	5.48348	0.588736	5.48348	0.498291	5.48348	0.498291	5.48348	0.498291	5.48348	0.498291	5.48348	0.539904	5.48348	0.498291
251	5.50551	0.588736	5.50551	0.498291	5.50551	0.498291	5.50551	0.498291	5.50551	0.498291	5.50551	0.539904	5.50551	0.498291
252	5.52753	0.588736	5.52753	0.498291	5.52753	0.498291	5.52753	0.498291	5.52753	0.498291	5.52753	0.539904	5.52753	0.498291
253	5.54955	0.588736	5.54955	0.498291	5.54955	0.498291	5.54955	0.498291	5.54955	0.498291	5.54955	0.539904	5.54955	0.498291
254	5.57157	0.588736	5.57157	0.498291	5.57157	0.498291	5.57157	0.498291	5.57157	0.498291	5.57157	0.539904	5.57157	0.498291
255	5.59359	0.588736	5.59359	0.498291	5.59359	0.498291	5.59359	0.498291	5.59359	0.498291	5.59359	0.539904	5.59359	0.498291
256	5.61562	0.588736	5.61562	0.498291	5.61562	0.498291	5.61562	0.498291	5.61562	0.498291	5.61562	0.539904	5.61562	0.498291
257	5.63764	0.588736	5.63764	0.498291	5.63764	0.498291	5.63764	0.498291	5.63764	0.498291	5.63764	0.539904	5.63764	0.498291
258	5.65966	0.588736	5.65966	0.498291	5.65966	0.498291	5.65966	0.498291	5.65966	0.498291	5.65966	0.539904	5.65966	0.498291
259	5.68168	0.588736	5.68168	0.498291	5.68168	0.498291	5.68168	0.498291	5.68168	0.498291	5.68168	0.539904	5.68168	0.498291
260	5.7037	0.588736	5.7037	0.498291	5.7037	0.498291	5.7037	0.498291	5.7037	0.498291	5.7037	0.539904	5.7037	0.498291
261	5.72573	0.588736	5.72573	0.498291	5.72573	0.498291	5.72573	0.498291	5.72573	0.498291	5.72573	0.539904	5.72573	0.498291
262	5.74775	0.588736	5.74775	0.498291	5.74775	0.498291	5.74775	0.498291	5.74775	0.498291	5.74775	0.539904	5.74775	0.498291
263	5.76977	0.588736	5.76977	0.498291	5.76977	0.498291	5.76977	0.498291	5.76977	0.498291	5.76977	0.539904	5.76977	0.498291
264	5.79179	0.588736	5.79179	0.498291	5.79179	0.498291	5.79179	0.498291	5.79179	0.498291	5.79179	0.539904	5.79179	0.498291
265	5.81381	0.588736	5.81381	0.498291	5.81381	0.498291	5.81381	0.498291	5.81381	0.498291	5.81381	0.539904	5.81381	0.498291
266	5.83584	0.588736	5.83584	0.498291	5.83584	0.498291	5.83584	0.498291	5.83584	0.498291	5.83584	0.539904	5.83584	0.498291
267	5.85786	0.588736	5.85786	0.498291	5.85786	0.498291	5.85786	0.498291	5.85786	0.498291	5.85786	0.539904	5.85786	0.498291
268	5.87988	0.588736	5.87988	0.498291	5.87988	0.498291	5.87988	0.498291	5.87988	0.498291	5.87988	0.539904	5.87988	0.498291
269	5.9019	0.588736	5.9019	0.498291	5.9019	0.498291	5.9019	0.498291	5.9019	0.498291	5.9019	0.539904	5.9019	0.498291
270	5.92392	0.588736	5.92392	0.498291	5.92392	0.498291	5.92392	0.498291	5.92392	0.498291	5.92392	0.539904	5.92392	0.498291
271	5.94595	0.588736	5.94595	0.498291	5.94595	0.498291	5.94595	0.498291	5.94595	0.498291	5.94595	0.539904	5.94595	0.498291
272	5.96797	0.588736	5.96797	0.498291	5.96797	0.498291	5.96797	0.498291	5.96797	0.498291	5.96797	0.539904	5.96797	0.498291
273	5.98999	0.588736	5.98999	0.498291	5.98999	0.498291	5.98999	0.498291	5.98999	0.498291	5.98999	0.539904	5.98999	0.498291
274	6.01201	0.588736	6.01201	0.498291	6.01201	0.498291	6.01201	0.498291	6.01201	0.498291	6.01201	0.539904	6.01201	0.498291
275	6.03403	0.588736	6.03403	0.498291	6.03403	0.498291	6.03403	0.498291	6.03403	0.498291	6.03403	0.539904	6.03403	0.498291
276	6.05606	0.588736	6.05606	0.498291	6.05606	0.498291	6.05606	0.498291	6.05606	0.498291	6.05606	0.539904	6.05606	0.498291
277	6.07808	0.588736	6.07808	0.498291	6.07808	0.498291	6.07808	0.498291	6.07808	0.498291	6.07808	0.539904	6.07808	0.498291
278	6.1001	0.588736	6.1001	0.498291	6.1001	0.498291	6.1001	0.498291	6.1001	0.498291	6.1001	0.539904	6.1001	0.498291
279	6.12212	0.588736	6.12212	0.498291	6.12212	0.498291	6.12212	0.498291	6.12212	0.498291	6.12212	0.539904	6.12212	0.498291
280	6.14414	0.588736	6.14414	0.498291	6.14414	0.498291	6.14414	0.498291	6.14414	0.498291	6.14414	0.539904	6.14414	0.498291
281	6.16617	0.588736	6.16617	0.498291	6.16617	0.498291	6.16617	0.498291	6.16617	0.498291	6.16617	0.539904	6.16617	0.498291
282	6.18819	0.588736	6.18819	0.498291	6.18819	0.498291	6.18819	0.498291	6.18819	0.498291	6.18819	0.539904	6.18819	0.498291
283	6.21021	0.588736	6.21021	0.498291	6.21021	0.498291	6.21021	0.498291	6.21021	0.498291	6.21021	0.539904	6.21021	0.498291
284	6.23223	0.588736	6.23223	0.498291	6.23223	0.498291	6.23223	0.498291	6.23223	0.498291	6.23223	0.539904	6.23223	0.498291
285	6.25425	0.588736	6.25425	0.498291	6.25425	0.498291	6.25425	0.498291	6.25425	0.498291	6.25425	0.539904	6.25425	0.498291
286	6.27628	0.588736	6.27628	0.498291	6.27628	0.498291	6.27628	0.498291	6.27628	0.498291	6.27628	0.539904	6.27628	0.498291
287	6.2983	0.588736	6.2983	0.498291	6.2983	0.498291	6.2983	0.498291	6.2983	0.498291	6.2983	0.539904	6.2983	0.498291
288	6.32032	0.588736	6.32032	0.498291	6.32032	0.498291	6.32032	0.498291	6.32032	0.498291	6.32032	0.539904	6.32032	0.498291
289	6.34234	0.588736	6.34234	0.498291	6.34234	0.498291	6.34234	0.498291	6.34234	0.498291	6.34234	0.539904	6.34234	0.498291
290	6.36436	0.588736	6.36436	0.498291	6.36436	0.498291	6.36436	0.498291	6.36436	0.498291	6.36436	0.539904	6.36436	0.498291
291	6.38639	0.588736	6.38639	0.498291	6.38639	0.498291	6.38639	0.498291	6.38639	0.498291	6.38639	0.539904	6.38639	0.498291
292	6.40841	0.588736	6.40841	0.498291	6.40841	0.498291	6.40841	0.498291	6.40841	0.498291	6.40841	0.539904	6.40841	0.498291
293	6.43043	0.588736	6.43043	0.498291	6.43043	0.498291	6.43043	0.498291	6.43043	0.498291	6.43043	0.539904	6.43043	0.498291
294	6.45245	0.588736	6.45245	0.498291	6.45245	0.498291	6.45245	0.498291	6.45245	0.498291	6.45245	0.539904	6.45245	0.498291
295	6.47447	0.588736	6.47447	0.498291	6.47447	0.498291	6.47447	0.498291	6.47447	0.498291	6.47447	0.539904	6.47447	0.498291
296	6.4965	0.588736	6.4965	0.498291	6.4965	0.498291	6.4965	0.498291	6.4965	0.498291	6.4965	0.539904	6.4965	0.498291
297	6.51852	0.588736	6.51852	0.498291	6.51852	0.498291	6.51852	0.498291	6.51852	0.498291	6.51852	0.539904	6.51852	0.498291
298	6.54054	0.588736	6.54054	0.498291	6.54054	0.498291	6.54054	0.498291	6.54054	0.498291	6.54054	0.539904	6.54054	0.498291
299	6.56256	0.588736	6.56256	0.498291	6.56256	0.498291	6.56256	0.498291	6.56256	0.498291	6.56256	0.539904	6.56256	0.498291
300	6.58458	0.588736	6.58458	0.498291	6.58458	0.498291	6.58458	0.498291	6.58458	0.498291	6.58458	0.539904	6.58458	0.498291
301	6.60661	0.588736	6.60661	0.498291	6.60661	0.498291	6.60661	0.498291	6.60661	0.498291	6.60661	0.539904	6.60661	0.498291
302	6.62863	0.588736	6.62863	0.498291	6.62863	0.498291	6.62863	0.498291	6.62863	0.498291	6.62863	0.539904	6.62863	0.498291
303	6.65065	0.588736	6.65065	0.498291	6.65065	0.498291	6.65065	0.498291	6.65065	0.498291	6.65065	0.539904	6.65065	0.498291
304	6.67267	0.588736	6.67267	0.498291	6.67267	0.498291	6.67267	0.498291	6.67267	0.498291	6.67267	0.539904	6.67267	0.498291
305	6.69469	0.588736	6.69469	0.498291	6.69469	0.498291	6.69469	0.498291	6.69469	0.498291	6.69469	0.539904	6.69469	0.498291
306	6.71672	0.588736	6.71672	0.498291	6.71672	0.498291	6.71672	0.498291	6.71672	0.498291	6.71672	0.539904	6.71672	0.498291
307	6.73874	0.588736	6.73874	0.498291	6.73874	0.498291	6.73874	0.498291	6.73874	0.498291	6.73874	0.539904	6.73874	0.498291
308	6.76076	0.588736	6.76076	0.498291	6.76076	0.498291	6.76076	0.498291	6.76076	0.498291	6.76076	0.539904	6.76076	0.498291
309	6.78278	0.588736	6.78278	0.498291	6.78278	0.498291	6.78278	0.498291	6.78278	0.498291	6.78278	0.539904	6.78278	0.498291
310	6.8048	0.588736	6.8048	0.498291	6.8048	0.498291	6.8048	0.498291	6.8048	0.498291	6.8048	0.539904	6.8048	0.498291
311	6.82683	0.588736	6.82683	0.498291	6.82683	0.498291	6.82683	0.498291	6.82683	0.498291	6.82683	0.539904	6.82683	0.498291
312	6.84885	0.588736	6.84885	0.498291	6.84885	0.498291	6.84885	0.498291	6.84885	0.498291	6.84885	0.539904	6.84885	0.498291
313	6.87087	0.588736	6.87087	0.498291	6.87087	0.498291	6.87087	0.498291	6.87087	0.498291	6.87087	0.539904	6.87087	0.498291
314	6.89289	0.588736	6.89289	0.498291	6.89289	0.498291	6.89289	0.498291	6.89289	0.498291	6.89289	0.539904	6.89289	0.498291
315	6.91491	0.588736	6.91491	0.498291	6.91491	0.498291	6.91491	0.498291	6.91491	0.498291	6.91491	0.539904	6.91491	0.498291
316	6.93694	0.588736	6.93694	0.498291	6.93694	0.498291	6.93694	0.498291	6.93694	0.498291	6.93694	0.539904	6.93694	0.498291
317	6.95896	0.588736	6.95896	0.498291	6.95896	0.498291	6.95896	0.498291	6.95896	0.498291	6.95896	0.539904	6.95896	0.498291
318	6.98098	0.588736	6.98098	0.498291	6.98098	0.498291	6.98098	0.498291	6.98098	0.498291	6.98098	0.539904	6.98098	0.498291
319	7.003	0.588736	7.003	0.498291	7.003	0.498291	7.003	0.498291	7.003	0.498291	7.003	0.539904	7.003	0.498291
320	7.02503	0.588736	7.02503	0.498291	7.02503	0.498291	7.02503	0.498291	7.02503	0.498291	7.02503	0.539904	7.02503	0.498291
321	7.04705	0.588736	7.04705	0.498291	7.04705	0.498291	7.04705	0.498291	7.04705	0.498291	7.04705	0.539904	7.04705	0.498291
322	7.06907	0.588736	7.06907	0.498291	7.06907	0.498291	7.06907	0.498291	7.06907	0.498291	7.06907	0.539904	7.06907	0.498291
323	7.09109	0.588736	7.09109	0.498291	7.09109	0.498291	7.09109	0.498291	7.09109	0.498291	7.09109	0.539904	7.09109	0.498291
324	7.11311	0.588736	7.11311	0.498291	7.11311	0.498291	7.11311	0.498291	7.11311	0.498291	7.11311	0.539904	7.11311	0.498291
325	7.13514	0.588736	7.13514	0.498291	7.13514	0.498291	7.13514	0.498291	7.13514	0.498291	7.13514	0.539904	7.13514	0.498291
326	7.15716	0.588736	7.15716	0.498291	7.15716	0.498291	7.15716	0.498291	7.15716	0.498291	7.15716	0.539904	7.15716	0.498291
327	7.17918	0.588736	7.17918	0.498291	7.17918	0.498291	7.17918	0.498291	7.17918	0.498291	7.17918	0.539904	7.17918	0.498291
328	7.2012	0.588736	7.2012	0.498291	7.2012	0.498291	7.2012	0.498291	7.2012	0.498291	7.2012	0.539904	7.2012	0.498291
329	7.22322	0.588736	7.22322	0.498291	7.22322	0.498291	7.22322	0.498291	7.22322	0.498291	7.22322	0.539904	7.22322	0.498291
330	7.24525	0.588736	7.24525	0.498291	7.24525	0.498291	7.24525	0.498291	7.24525	0.498291	7.24525	0.539904	7.24525	0.498291
331	7.26727	0.588736	7.26727	0.498291	7.26727	0.498291	7.26727	0.498291	7.26727	0.498291	7.26727	0.539904	7.26727	0.498291
332	7.28929	0.588736	7.28929	0.498291	7.28929	0.498291	7.28929	0.498291	7.28929	0.498291	7.28929	0.539904	7.28929	0.498291
333	7.31131	0.588736	7.31131	0.498291	7.31131	0.498291	7.31131	0.498291	7.31131	0.498291	7.31131	0.539904	7.31131	0.498291
334	7.33333	0.588736	7.33333	0.498291	7.33333	0.498291	7.33333	0.498291	7.33333	0.498291	7.33333	0.539904	7.33333	0.498291
335	7.35536	0.588736	7.35536	0.498291	7.35536	0.498291	7.35536	0.498291	7.35536	0.498291	7.35536	0.539904	7.35536	0.498291
336	7.37738	0.588736	7.37738	0.498291	7.37738	0.498291	7.37738	0.498291	7.37738	0.498291	7.37738	0.539904	7.37738	0.498291
337	7.3994	0.588736	7.3994	0.498291	7.3994	0.498291	7.3994	0.498291	7.3994	0.498291	7.3994	0.539904	7.3994	0.498291
338	7.42142	0.588736	7.42142	0.498291	7.42142	0.498291	7.42142	0.498291	7.42142	0.498291	7.42142	0.539904	7.42142	0.498291
339	7.44344	0.588736	7.44344	0.498291	7.44344	0.498291	7.44344	0.498291	7.44344	0.498291	7.44344	0.539904	7.44344	0.498291
340	7.46547	0.588736	7.46547	0.498291	7.46547	0.498291	7.46547	0.498291	7.46547	0.498291	7.46547	0.539904	7.46547	0.498291
341	7.48749	0.588736	7.48749	0.498291	7.48749	0.498291	7.48749	0.498291	7.48749	0.498291	7.48749	0.539904	7.48749	0.498291
342	7.50951	0.588736	7.50951	0.498291	7.50951	0.498291	7.50951	0.498291	7.50951	0.498291	7.50951	0.539904	7.50951	0.498291
343	7.53153	0.588736	7.53153	0.498291	7.53153	0.498291	7.53153	0.498291	7.53153	0.498291	7.53153	0.539904	7.53153	0.498291
344	7.55355	0.588736	7.55355	0.498291	7.55355	0.498291	7.55355	0.498291	7.55355	0.498291	7.55355	0.539904	7.55355	0.498291
345	7.57558	0.588736	7.57558	0.498291	7.57558	0.498291	7.57558	0.498291	7.57558	0.498291	7.57558	0.539904	7.57558	0.498291
346	7.5976	0.588736	7.5976	0.498291	7.5976	0.498291	7.5976	0.498291	7.5976	0.498291	7.5976	0.539904	7.5976	0.498291
347	7.61962	0.588736	7.61962	0.498291	7.61962	0.498291	7.61962	0.498291	7.61962	0.498291	7.61962	0.539904	7.61962	0.498291
348	7.64164	0.588736	7.64164	0.498291	7.64164	0.498291	7.64164	0.498291	7.64164	0.498291	7.64164	0.539904	7.64164	0.498291
349	7.66366	0.588736	7.66366	0.498291	7.66366	0.498291	7.66366	0.498291	7.66366	0.498291	7.66366	0.539904	7.66366	0.498291
350	7.68569	0.588736	7.68569	0.498291	7.68569	0.498291	7.68569	0.498291	7.68569	0.498291	7.68569	0.539904	7.68569	0.498291
351	7.70771	0.588736	7.70771	0.498291	7.70771	0.498291	7.70771	0.498291	7.70771	0.498291	7.70771	0.539904	7.70771	0.498291
352	7.72973	0.588736	7.72973	0.498291	7.72973	0.498291	7.72973	0.498291	7.72973	0.498291	7.72973	0.539904	7.72973	0.498291
353	7.75175	0.588736	7.75175	0.498291	7.75175	0.498291	7.75175	0.498291	7.75175	0.498291	7.75175	0.539904	7.75175	0.498291
354	7.77377	0.588736	7.77377	0.498291	7.77377	0.498291	7.77377	0.498291	7.77377	0.498291	7.77377	0.539904	7.77377	0.498291
355	7.7958	0.588736	7.7958	0.498291	7.7958	0.498291	7.7958	0.498291	7.7958	0.498291	7.7958	0.539904	7.7958	0.498291
356	7.81782	0.588736	7.81782	0.498291	7.81782	0.498291	7.81782	0.498291	7.81782	0.498291	7.81782	0.539904	7.81782	0.498291
357	7.83984	0.588736	7.83984	0.498291	7.83984	0.498291	7.83984	0.498291	7.83984	0.498291	7.83984	0.539904	7.83984	0.498291
358	7.86186	0.588736	7.86186	0.498291	7.86186	0.498291	7.86186	0.498291	7.86186	0.498291	7.86186	0.539904	7.86186	0.498291
359	7.88388	0.588736	7.88388	0.498291	7.88388	0.498291	7.88388	0.498291	7.88388	0.498291	7.88388	0.539904	7.88388	0.498291
360	7.90591	0.588736	7.90591	0.498291	7.90591	0.498291	7.90591	0.498291	7.90591	0.498291	7.90591	0.539904	7.90591	0.498291
361	7.92793	0.588736	7.92793	0.498291	7.92793	0.498291	7.92793	0.498291	7.92793	0.498291	7.92793	0.539904	7.92793	0.498291
362	7.94995	0.588736	7.94995	0.498291	7.94995	0.498291	7.94995	0.498291	7.94995	0.498291	7.94995	0.539904	7.94995	0.498291
363	7.97197	0.588736	7.97197	0.498291	7.97197	0.498291	7.97197	0.498291	7.97197	0.498291	7.97197	0.539904	7.97197	0.498291
364	7.99399	0.588736	7.99399	0.498291	7.99399	0.498291	7.99399	0.498291	7.99399	0.498291	7.99399	0.539904	7.99399	0.498291
365	8.01602	0.588736	8.01602	0.498291	8.01602	0.498291	8.01602	0.498291	8.01602	0.498291	8.01602	0.539904	8.01602	0.498291
366	8.03804	0.588736	8.03804	0.498291	8.03804	0.498291	8.03804	0.498291	8.03804	0.498291	8.03804	0.539904	8.03804	0.498291
367	8.06006	0.588736	8.06006	0.498291	8.06006	0.498291	8.06006	0.498291	8.06006	0.498291	8.06006	0.539904	8.06006	0.498291
368	8.08208	0.588736	8.08208	0.498291	8.08208	0.498291	8.08208	0.498291	8.08208	0.498291	8.08208	0.539904	8.08208	0.498291
369	8.1041	0.588736	8.1041	0.498291	8.1041	0.498291	8.1041	0.498291	8.1041	0.498291	8.1041	0.539904	8.1041	0.498291
370	8.12613	0.588736	8.12613	0.498291	8.12613	0.498291	8.12613	0.498291	8.12613	0.498291	8.12613	0.539904	8.12613	0.498291
371	8.14815	0.588736	8.14815	0.498291	8.14815	0.498291	8.14815	0.498291	8.14815	0.498291	8.14815	0.539904	8.14815	0.498291
372	8.17017	0.588736	8.17017	0.498291	8.17017	0.498291	8.17017	0.498291	8.17017	0.498291	8.17017	0.539904	8.17017	0.498291
373	8.19219	0.588736	8.19219	0.498291	8.19219	0.498291	8.19219	0.498291	8.19219	0.498291	8.19219	0.539904	8.19219	0.498291
374	8.21421	0.588736	8.21421	0.498291	8.21421	0.498291	8.21421	0.498291	8.21421	0.498291	8.21421	0.539904	8.21421	0.498291
375	8.23624	0.588736	8.23624	0.498291	8.23624	0.498291	8.23624	0.498291	8.23624	0.498291	8.23624	0.539904	8.23624	0.498291
376	8.25826	0.588736	8.25826	0.498291	8.25826	0.498291	8.25826	0.498291	8.25826	0.498291	8.25826	0.539904	8.25826	0.498291
377	8.28028	0.588736	8.28028	0.498291	8.28028	0.498291	8.28028	0.498291	8.28028	0.498291	8.28028	0.539904	8.28028	0.498291
378	8.3023	0.588736	8.3023	0.498291	8.3023	0.498291	8.3023	0.498291	8.3023	0.498291	8.3023	0.539904	8.3023	0.498291
379	8.32432	0.588736	8.32432	0.498291	8.32432	0.498291	8.32432	0.498291	8.32432	0.498291	8.32432	0.539904	8.32432	0.498291
380	8.34635	0.588736	8.34635	0.498291	8.34635	0.498291	8.34635	0.498291	8.34635	0.498291	8.34635	0.539904	8.34635	0.498291
381	8.36837	0.588736	8.36837	0.498291	8.36837	0.498291	8.36837	0.498291	8.36837	0.498291	8.36837	0.539904	8.36837	0.498291
382	8.39039	0.588736	8.39039	0.498291	8.39039	0.498291	8.39039	0.498291	8.39039	0.498291	8.39039	0.539904	8.39039	0.498291
383	8.41241	0.588736	8.41241	0.498291	8.41241	0.498291	8.41241	0.498291	8.41241	0.498291	8.41241	0.539904	8.41241	0.498291
384	8.43443	0.588736	8.43443	0.498291	8.43443	0.498291	8.43443	0.498291	8.43443	0.498291	8.43443	0.539904	8.43443	0.498291
385	8.45646	0.588736	8.45646	0.498291	8.45646	0.498291	8.45646	0.498291	8.45646	0.498291	8.45646	0.539904	8.45646	0.498291
386	8.47848	0.588736	8.47848	0.498291	8.47848	0.498291	8.47848	0.498291	8.47848	0.498291	8.47848	0.539904	8.47848	0.498291
387	8.5005	0.588736	8.5005	0.498291	8.5005	0.498291	8.5005	0.498291	8.5005	0.498291	8.5005	0.539904	8.5005	0.498291
388	8.52252	0.588736	8.52252	0.498291	8.52252	0.498291	8.52252	0.498291	8.52252	0.498291	8.52252	0.539904	8.52252	0.498291
389	8.54454	0.588736	8.54454	0.498291	8.54454	0.498291	8.54454	0.498291	8.54454	0.498291	8.54454	0.539904	8.54454	0.498291
390	8.56657	0.588736	8.56657	0.498291	8.56657	0.498291	8.56657	0.498291	8.56657	0.498291	8.56657	0.539904	8.56657	0.498291
391	8.58859	0.588736	8.58859	0.498291	8.58859	0.498291	8.58859	0.498291	8.58859	0.498291	8.58859	0.539904	8.58859	0.498291
392	8.61061	0.588736	8.61061	0.498291	8.61061	0.498291	8.61061	0.498291	8.61061	0.498291	8.61061	0.539904	8.61061	0.498291
393	8.63263	0.588736	8.63263	0.498291	8.63263	0.498291	8.63263	0.498291	8.63263	0.498291	8.63263	0.539904	8.63263	0.498291
394	8.65465	0.588736	8.65465	0.498291	8.65465	0.498291	8.65465	0.498291	8.65465	0.498291	8.65465	0.539904	8.65465	0.498291
395	8.67668	0.588736	8.67668	0.498291	8.67668	0.498291	8.67668	0.498291	8.67668	0.498291	8.67668	0.539904	8.67668	0.498291
396	8.6987	0.588736	8.6987	0.498291	8.6987	0.498291	8.6987	0.498291	8.6987	0.498291	8.6987	0.539904	8.6987	0.498291
397	8.72072	0.588736	8.72072	0.498291	8.72072	0.498291	8.72072	0.498291	8.72072	0.498291	8.72072	0.539904	8.72072	0.498291
398	8.74274	0.588736	8.74274	0.498291	8.74274	0.498291	8.74274	0.498291	8.74274	0.498291	8.74274	0.539904	8.74274	0.498291
399	8.76476	0.588736	8.76476	0.498291	8.76476	0.498291	8.76476	0.498291	8.76476	0.498291	8.76476	0.539904	8.76476	0.498291
400	8.78679	0.588736	8.78679	0.498291	8.78679	0.498291	8.78679	0.498291	8.78679	0.498291	8.78679	0.539904	8.78679	0.498291
401	8.80881	0.588736	8.80881	0.498291	8.80881	0.498291	8.80881	0.498291	8.80881	0.498291	8.80881	0.539904	8.80881	0.498291
402	8.83083	0.588736	8.83083	0.498291	8.83083	0.498291	8.83083	0.498291	8.83083	0.498291	8.83083	0.539904	8.83083	0.498291
403	8.85285	0.588736	8.85285	0.498291	8.85285	0.498291	8.85285	0.498291	8.85285	0.498291	8.85285	0.539904	8.85285	0.498291
404	8.87487	0.588736	8.87487	0.498291	8.87487	0.498291	8.87487	0.498291	8.87487	0.498291	8.87487	0.539904	8.87487	0.498291
405	8.8969	0.588736	8.8969	0.498291	8.8969	0.498291	8.8969	0.498291	8.8969	0.498291	8.8969	0.539904	8.8969	0.498291
406	8.91892	0.588736	8.91892	0.498291	8.91892	0.498291	8.91892	0.498291	8.91892	0.498291	8.91892	0.539904	8.91892	0.498291
407	8.94094	0.588736	8.94094	0.498291	8.94094	0.498291	8.94094	0.498291	8.94094	0.498291	8.94094	0.539904	8.94094	0.498291
408	8.96296	0.588736	8.96296	0.498291	8.96296	0.498291	8.96296	0.498291	8.96296	0.498291	8.96296	0.539904	8.96296	0.498291
409	8.98498	0.588736	8.98498	0.498291	8.98498	0.498291	8.98498	0.498291	8.98498	0.498291	8.98498	0.539904	8.98498	0.498291
410	9.00701	0.588736	9.00701	0.498291	9.00701	0.498291	9.00701	0.498291	9.00701	0.498291	9.00701	0.539904	9.00701	0.498291
411	9.02903	0.588736	9.02903	0.498291	9.02903	0.498291	9.02903	0.498291	9.02903	0.498291	9.02903	0.539904	9.02903	0.498291
412	9.05105	0.588736	9.05105	0.498291	9.05105	0.498291	9.05105	0.498291	9.05105	0.498291	9.05105	0.539904	9.05105	0.498291
413	9.07307	0.588736	9.07307	0.498291	9.07307	0.498291	9.07307	0.498291	9.07307	0.498291	9.07307	0.539904	9.07307	0.498291
414	9.0951	0.588736	9.0951	0.498291	9.0951	0.498291	9.0951	0.498291	9.0951	0.498291	9.0951	0.539904	9.0951	0.498291
415	9.11712	0.588736	9.11712	0.498291	9.11712	0.498291	9.11712	0.498291	9.11712	0.498291	9.11712	0.539904	9.11712	0.498291
416	9.13914	0.588736	9.13914	0.498291	9.13914	0.498291	9.13914	0.498291	9.13914	0.498291	9.13914	0.539904	9.13914	0.498291
417	9.16116	0.588736	9.16116	0.498291	9.16116	0.498291	9.16116	0.498291	9.16116	0.498291	9.16116	0.539904	9.16116	0.498291
418	9.18318	0.588736	9.18318	0.498291	9.18318	0.498291	9.18318	0.498291	9.18318	0.498291	9.18318	0.539904	9.18318	0.498291
419	9.20521	0.588736	9.20521	0.498291	9.20521	0.498291	9.20521	0.498291	9.20521	0.498291	9.20521	0.539904	9.20521	0.498291
420	9.22723	0.588736	9.22723	0.498291	9.22723	0.498291	9.22723	0.498291	9.22723	0.498291	9.22723	0.539904	9.22723	0.498291
421	9.24925	0.588736	9.24925	0.498291	9.24925	0.498291	9.24925	0.498291	9.24925	0.498291	9.24925	0.539904	9.24925	0.498291
422	9.27127	0.588736	9.27127	0.498291	9.27127	0.498291	9.27127	0.498291	9.27127	0.498291	9.27127	0.539904	9.27127	0.498291
423	9.29329	0.588736	9.29329	0.498291	9.29329	0.498291	9.29329	0.498291	9.29329	0.498291	9.29329	0.539904	9.29329	0.498291
424	9.31532	0.588736	9.31532	0.498291	9.31532	0.498291	9.31532	0.498291	9.31532	0.498291	9.31532	0.539904	9.31532	0.498291
425	9.33734	0.588736	9.33734	0.498291	9.33734	0.498291	9.33734	0.498291	9.33734	0.498291	9.33734	0.539904	9.33734	0.498291
426	9.35936	0.588736	9.35936	0.498291	9.35936	0.498291	9.35936	0.498291	9.35936	0.498291	9.35936	0.539904	9.35936	0.498291
427	9.38138	0.588736	9.38138	0.498291	9.38138	0.498291	9.38138	0.498291	9.38138	0.498291	9.38138	0.539904	9.38138	0.498291
428	9.4034	0.588736	9.4034	0.498291	9.4034	0.498291	9.4034	0.498291	9.4034	0.498291	9.4034	0.539904	9.4034	0.498291
429	9.42543	0.588736	9.42543	0.498291	9.42543	0.498291	9.42543	0.498291	9.42543	0.498291	9.42543	0.539904	9.42543	0.498291
430	9.44745	0.588736	9.44745	0.498291	9.44745	0.498291	9.44745	0.498291	9.44745	0.498291	9.44745	0.539904	9.44745	0.498291
431	9.46947	0.588736	9.46947	0.498291	9.46947	0.498291	9.46947	0.498291	9.46947	0.498291	9.46947	0.539904	9.46947	0.498291
432	9.49149	0.588736	9.49149	0.498291	9.49149	0.498291	9.49149	0.498291	9.49149	0.498291	9.49149	0.539904	9.49149	0.498291
433	9.51351	0.588736	9.51351	0.498291	9.51351	0.498291	9.51351	0.498291	9.51351	0.498291	9.51351	0.539904	9.51351	0.498291
434	9.53554	0.588736	9.53554	0.498291	9.53554	0.498291	9.53554	0.498291	9.53554	0.498291	9.53554	0.539904	9.53554	0.498291
435	9.55756	0.588736	9.55756	0.498291	9.55756	0.498291	9.55756	0.498291	9.55756	0.498291	9.55756	0.539904	9.55756	0.498291
436	9.57958	0.588736	9.57958	0.498291	9.57958	0.498291	9.57958	0.498291	9.57958	0.498291	9.57958	0.539904	9.57958	0.498291
437	9.6016	0.588736	9.6016	0.498291	9.6016	0.498291	9.6016	0.498291	9.6016	0.498291	9.6016	0.539904	9.6016	0.498291
438	9.62362	0.588736	9.62362	0.498291	9.62362	0.498291	9.62362	0.498291	9.62362	0.498291	9.62362	0.539904	9.62362	0.498291
439	9.64565	0.588736	9.64565	0.498291	9.64565	0.498291	9.64565	0.498291	9.64565	0.498291	9.64565	0.539904	9.64565	0.498291
440	9.66767	0.588736	9.66767	0.498291	9.66767	0.498291	9.66767	0.498291	9.66767	0.498291	9.66767	0.539904	9.66767	0.498291
441	9.68969	0.588736	9.68969	0.498291	9.68969	0.498291	9.68969	0.498291	9.68969	0.498291	9.68969	0.539904	9.68969	0.498291
442	9.71171	0.588736	9.71171	0.498291	9.71171	0.498291	9.71171	0.498291	9.71171	0.498291	9.71171	0.539904	9.71171	0.498291
443	9.73373	0.588736	9.73373	0.498291	9.73373	0.498291	9.73373	0.498291	9.73373	0.498291	9.73373	0.539904	9.73373	0.498291
444	9.75576	0.588736	9.75576	0.498291	9.75576	0.498291	9.75576	0.498291	9.75576	0.498291	9.75576	0.539904	9.75576	0.498291
445	9.77778	0.588736	9.77778	0.498291	9.77778	0.498291	9.77778	0.498291	9.77778	0.498291	9.77778	0.539904	9.77778	0.498291
446	9.7998	0.588736	9.7998	0.498291	9.7998	0.498291	9.7998	0.498291	9.7998	0.498291	9.7998	0.539904	9.7998	0.498291
447	9.82182	0.588736	9.82182	0.498291	9.82182	0.498291	9.82182	0.498291	9.82182	0.498291	9.82182	0.539904	9.82182	0.498291
448	9.84384	0.588736	9.84384	0.498291	9.84384	0.498291	9.84384	0.498291	9.84384	0.498291	9.84384	0.539904	9.84384	0.498291
449	9.86587	0.588736	9.86587	0.498291	9.86587	0.498291	9.86587	0.498291	9.86587	0.498291	9.86587	0.539904	9.86587	0.498291
450	9.88789	0.588736	9.88789	0.498291	9.88789	0.498291	9.88789	0.498291	9.88789	0.498291	9.88789	0.539904	9.88789	0.498291
451	9.90991	0.588736	9.90991	0.498291	9.90991	0.498291	9.90991	0.498291	9.90991	0.498291	9.90991	0.539904	9.90991	0.498291
452	9.93193	0.588736	9.93193	0.498291	9.93193	0.498291	9.93193	0.498291	9.93193	0.498291	9.93193	0.539904	9.93193	0.498291
453	9.95395	0.588736	9.95395	0.498291	9.95395	0.498291	9.95395	0.498291	9.95395	0.498291	9.95395	0.539904	9.95395	0.498291
454	9.97598	0.588736	9.97598	0.498291	9.97598	0.498291	9.97598	0.498291	9.97598	0.498291	9.97598	0.539904	9.97598	0.498291
455	9.998	0.588736	9.998	0.498291	9.998	0.498291	9.998	0.498291	9.998	0.498291	9.998	0.539904	9.998	0.498291
456	10.02	0.588736	10.02	0.498291	10.02	0.498291	10.02	0.498291	10.02	0.498291	10.02	0.539904	10.02	0.498291
457	10.042	0.588736	10.042	0.498291	10.042	0.498291	10.042	0.498291	10.042	0.498291	10.042	0.539904	10.042	0.498291
458	10.0641	0.588736	10.0641	0.498291	10.0641	0.498291	10.0641	0.498291	10.0641	0.498291	10.0641	0.539904	10.0641	0.498291
459	10.0861	0.588736	10.0861	0.498291	10.0861	0.498291	10.0861	0.498291	10.0861	0.498291	10.0861	0.539904	10.0861	0.498291
460	10.1081	0.588736	10.1081	0.498291	10.1081	0.498291	10.1081	0.498291	10.1081	0.498291	10.1081	0.539904	10.1081	0.498291
461	10.1301	0.588736	10.1301	0.498291	10.1301	0.498291	10.1301	0.498291	10.1301	0.498291	10.1301	0.539904	10.1301	0.498291
462	10.1522	0.588736	10.1522	0.498291	10.1522	0.498291	10.1522	0.498291	10.1522	0.498291	10.1522	0.539904	10.1522	0.498291
463	10.1742	0.588736	10.1742	0.498291	10.1742	0.498291	10.1742	0.498291	10.1742	0.498291	10.1742	0.539904	10.1742	0.498291
464	10.1962	0.588736	10.1962	0.498291	10.1962	0.498291	10.1962	0.498291	10.1962	0.498291	10.1962	0.539904	10.1962	0.498291
465	10.2182	0.588736	10.2182	0.498291	10.2182	0.498291	10.2182	0.498291	10.2182	0.498291	10.2182	0.539904	10.2182	0.498291
466	10.2402	0.588736	10.2402	0.498291	10.2402	0.498291	10.2402	0.498291	10.2402	0.498291	10.2402	0.539904	10.2402	0.498291
467	10.2623	0.588736	10.2623	0.498291	10.2623	0.498291	10.2623	0.498291	10.2623	0.498291	10.2623	0.539904	10.2623	0.498291
468	10.2843	0.588736	10.2843	0.498291	10.2843	0.498291	10.2843	0.498291	10.2843	0.498291	10.2843	0.539904	10.2843	0.498291
469	10.3063	0.588736	10.3063	0.498291	10.3063	0.498291	10.3063	0.498291	10.3063	0.498291	10.3063	0.539904	10.3063	0.498291
470	10.3283	0.588736	10.3283	0.498291	10.3283	0.498291	10.3283	0.498291	10.3283	0.498291	10.3283	0.539904	10.3283	0.498291
471	10.3504	0.588736	10.3504	0.498291	10.3504	0.498291	10.3504	0.498291	10.3504	0.498291	10.3504	0.539904	10.3504	0.498291
472	10.3724	0.588736	10.3724	0.498291	10.3724	0.498291	10.3724	0.498291	10.3724	0.498291	10.3724	0.539904	10.3724	0.498291
473	10.3944	0.588736	10.3944	0.498291	10.3944	0.498291	10.3944	0.498291	10.3944	0.498291	10.3944	0.539904	10.3944	0.498291
474	10.4164	0.588736	10.4164	0.498291	10.4164	0.498291	10.4164	0.498291	10.4164	0.498291	10.4164	0.539904	10.4164	0.498291
475	10.4384	0.588736	10.4384	0.498291	10.4384	0.498291	10.4384	0.498291	10.4384	0.498291	10.4384	0.539904	10.4384	0.498291
476	10.4605	0.588736	10.4605	0.498291	10.4605	0.498291	10.4605	0.498291	10.4605	0.498291	10.4605	0.539904	10.4605	0.498291
477	10.4825	0.588736	10.4825	0.498291	10.4825	0.498291	10.4825	0.498291	10.4825	0.498291	10.4825	0.539904	10.4825	0.498291
478	10.5045	0.588736	10.5045	0.498291	10.5045	0.498291	10.5045	0.498291	10.5045	0.498291	10.5045	0.539904	10.5045	0.498291
479	10.5265	0.588736	10.5265	0.498291	10.5265	0.498291	10.5265	0.498291	10.5265	0.498291	10.5265	0.539904	10.5265	0.498291
480	10.5485	0.588736	10.5485	0.498291	10.5485	0.498291	10.5485	0.498291	10.5485	0.498291	10.5485	0.539904	10.5485	0.498291
481	10.5706	0.588736	10.5706	0.498291	10.5706	0.498291	10.5706	0.498291	10.5706	0.498291	10.5706	0.539904	10.5706	0.498291
482	10.5926	0.588736	10.5926	0.498291	10.5926	0.498291	10.5926	0.498291	10.5926	0.498291	10.5926	0.539904	10.5926	0.498291
483	10.6146	0.588736	10.6146	0.498291	10.6146	0.498291	10.6146	0.498291	10.6146	0.498291	10.6146	0.539904	10.6146	0.498291
484	10.6366	0.588736	10.6366	0.498291	10.6366	0.498291	10.6366	0.498291	10.6366	0.498291	10.6366	0.539904	10.6366	0.498291
485	10.6587	0.588736	10.6587	0.498291	10.6587	0.498291	10.6587	0.498291	10.6587	0.498291	10.6587	0.539904	10.6587	0.498291
486	10.6807	0.588736	10.6807	0.498291	10.6807	0.498291	10.6807	0.498291	10.6807	0.498291	10.6807	0.539904	10.6807	0.498291
487	10.7027	0.588736	10.7027	0.498291	10.7027	0.498291	10.7027	0.498291	10.7027	0.498291	10.7027	0.539904	10.7027	0.498291
488	10.7247	0.588736	10.7247	0.498291	10.7247	0.498291	10.7247	0.498291	10.7247	0.498291	10.7247	0.539904	10.7247	0.498291
489	10.7467	0.588736	10.7467	0.498291	10.7467	0.498291	10.7467	0.498291	10.7467	0.498291	10.7467	0.539904	10.7467	0.498291
490	10.7688	0.588736	10.7688	0.498291	10.7688	0.498291	10.7688	0.498291	10.7688	0.498291	10.7688	0.539904	10.7688	0.498291
491	10.7908	0.588736	10.7908	0.498291	10.7908	0.498291	10.7908	0.498291	10.7908	0.498291	10.7908	0.539904	10.7908	0.498291
492	10.8128	0.588736	10.8128	0.498291	10.8128	0.498291	10.8128	0.498291	10.8128	0.498291	10.8128	0.539904	10.8128	0.498291
493	10.8348	0.588736	10.8348	0.498291	10.8348	0.498291	10.8348	0.498291	10.8348	0.498291	10.8348	0.539904	10.8348	0.498291
494	10.8569	0.588736	10.8569	0.498291	10.8569	0.498291	10.8569	0.498291	10.8569	0.498291	10.8569	0.539904	10.8569	0.498291
495	10.8789	0.588736	10.8789	0.498291	10.8789	0.498291	10.8789	0.498291	10.8789	0.498291	10.8789	0.539904	10.8789	0.498291
496	10.9009	0.588736	10.9009	0.498291	10.9009	0.498291	10.9009	0.498291	10.9009	0.498291	10.9009	0.539904	10.9009	0.498291
497	10.9229	0.588736	10.9229	0.498291	10.9229	0.498291	10.9229	0.498291	10.9229	0.498291	10.9229	0.539904	10.9229	0.498291
498	10.9449	0.588736	10.9449	0.498291	10.9449	0.498291	10.9449	0.498291	10.9449	0.498291	10.9449	0.539904	10.9449	0.498291
499	10.967	0.588736	10.967	0.498291	10.967	0.498291	10.967	0.498291	10.967	0.498291	10.967	0.539904	10.967	0.498291
500	10.989	0.588736	10.989	0.498291	10.989	0.498291	10.989	0.498291	10.989	0.498291	10.989	0.539904	10.989	0.498291
501	11.011	0.588736	11.011	0.498291	11.011	0.498291	11.011	0.498291	11.011	0.498291	11.011	0.539904	11.011	0.498291
502	11.033	0.588736	11.033	0.498291	11.033	0.498291	11.033	0.498291	11.033	0.498291	11.033	0.539904	11.033	0.498291
503	11.0551	0.588736	11.0551	0.498291	11.0551	0.498291	11.0551	0.498291	11.0551	0.498291	11.0551	0.539904	11.0551	0.498291
504	11.0771	0.588736	11.0771	0.498291	11.0771	0.498291	11.0771	0.498291	11.0771	0.498291	11.0771	0.539904	11.0771	0.498291
505	11.0991	0.588736	11.0991	0.498291	11.0991	0.498291	11.0991	0.498291	11.0991	0.498291	11.0991	0.539904	11.0991	0.498291
506	11.1211	0.588736	11.1211	0.498291	11.1211	0.498291	11.1211	0.498291	11.1211	0.498291	11.1211	0.539904	11.1211	0.498291
507	11.1431	0.588736	11.1431	0.498291	11.1431	0.498291	11.1431	0.498291	11.1431	0.498291	11.1431	0.539904	11.1431	0.498291
508	11.1652	0.588736	11.1652	0.498291	11.1652	0.498291	11.1652	0.498291	11.1652	0.498291	11.1652	0.539904	11.1652	0.498291
509	11.1872	0.588736	11.1872	0.498291	11.1872	0.498291	11.1872	0.498291	11.1872	0.498291	11.1872	0.539904	11.1872	0.498291
510	11.2092	0.588736	11.2092	0.498291	11.2092	0.498291	11.2092	0.498291	11.2092	0.498291	11.2092	0.539904	11.2092	0.498291
511	11.2312	0.588736	11.2312	0.498291	11.2312	0.498291	11.2312	0.498291	11.2312	0.498291	11.2312	0.539904	11.2312	0.498291
512	11.2533	0.588736	11.2533	0.498291	11.2533	0.498291	11.2533	0.498291	11.2533	0.498291	11.2533	0.539904	11.2533	0.498291
513	11.2753	0.588736	11.2753	0.498291	11.2753	0.498291	11.2753	0.498291	11.2753	0.498291	11.2753	0.539904	11.2753	0.498291
514	11.2973	0.588736	11.2973	0.498291	11.2973	0.498291	11.2973	0.498291	11.2973	0.498291	11.2973	0.539904	11.2973	0.498291
515	11.3193	0.588736	11.3193	0.498291	11.3193	0.498291	11.3193	0.498291	11.3193	0.498291	11.3193	0.539904	11.3193	0.498291
516	11.3413	0.588736	11.3413	0.498291	11.3413	0.498291	11.3413	0.498291	11.3413	0.498291	11.3413	0.539904	11.3413	0.498291
517	11.3634	0.588736	11.3634	0.498291	11.3634	0.498291	11.3634	0.498291	11.3634	0.498291	11.3634	0.539904	11.3634	0.498291
518	11.3854	0.588736	11.3854	0.498291	11.3854	0.498291	11.3854	0.498291	11.3854	0.498291	11.3854	0.539904	11.3854	0.498291
519	11.4074	0.588736	11.4074	0.498291	11.4074	0.498291	11.4074	0.498291	11.4074	0.498291	11.4074	0.539904	11.4074	0.498291
520	11.4294	0.588736	11.4294	0.498291	11.4294	0.498291	11.4294	0.498291	11.4294	0.498291	11.4294	0.539904	11.4294	0.498291
521	11.4515	0.588736	11.4515	0.498291	11.4515	0.498291	11.4515	0.498291	11.4515	0.498291	11.4515	0.539904	11.4515	0.498291
522	11.4735	0.588736	11.4735	0.498291	11.4735	0.498291	11.4735	0.498291	11.4735	0.498291	11.4735	0.539904	11.4735	0.498291
523	11.4955	0.588736	11.4955	0.498291	11.4955	0.498291	11.4955	0.498291	11.4955	0.498291	11.4955	0.539904	11.4955	0.498291
524	11.5175	0.588736	11.5175	0.498291	11.5175	0.498291	11.5175	0.498291	11.5175	0.498291	11.5175	0.539904	11.5175	0.498291
525	11.5395	0.588736	11.5395	0.498291	11.5395	0.498291	11.5395	0.498291	11.5395	0.498291	11.5395	0.539904	11.5395	0.498291
526	11.5616	0.588736	11.5616	0.498291	11.5616	0.498291	11.5616	0.498291	11.5616	0.498291	11.5616	0.539904	11.5616	0.498291
527	11.5836	0.588736	11.5836	0.498291	11.5836	0.498291	11.5836	0.498291	11.5836	0.498291	11.5836	0.539904	11.5836	0.498291
528	11.6056	0.588736	11.6056	0.498291	11.6056	0.498291	11.6056	0.498291	11.6056	0.498291	11.6056	0.539904	11.6056	0.498291
529	11.6276	0.588736	11.6276	0.498291	11.6276	0.498291	11.6276	0.498291	11.6276	0.498291	11.6276	0.539904	11.6276	0.498291
530	11.6496	0.588736	11.6496	0.498291	11.6496	0.498291	11.6496	0.498291	11.6496	0.498291	11.6496	0.539904	11.6496	0.498291
531	11.6717	0.588736	11.6717	0.498291	11.6717	0.498291	11.6717	0.498291	11.6717	0.498291	11.6717	0.539904	11.6717	0.498291
532	11.6937	0.588736	11.6937	0.498291	11.6937	0.498291	11.6937	0.498291	11.6937	0.498291	11.6937	0.539904	11.6937	0.498291
533	11.7157	0.588736	11.7157	0.498291	11.7157	0.498291	11.7157	0.498291	11.7157	0.498291	11.7157	0.539904	11.7157	0.498291
534	11.7377	0.588736	11.7377	0.498291	11.7377	0.498291	11.7377	0.498291	11.7377	0.498291	11.7377	0.539904	11.7377	0.498291
535	11.7598	0.588736	11.7598	0.498291	11.7598	0.498291	11.7598	0.498291	11.7598	0.498291	11.7598	0.539904	11.7598	0.498291
536	11.7818	0.588736	11.7818	0.498291	11.7818	0.498291	11.7818	0.498291	11.7818	0.498291	11.7818	0.539904	11.7818	0.498291
537	11.8038	0.588736	11.8038	0.498291	11.8038	0.498291	11.8038	0.498291	11.8038	0.498291	11.8038	0.539904	11.8038	0.498291
538	11.8258	0.588736	11.8258	0.498291	11.8258	0.498291	11.8258	0.498291	11.8258	0.498291	11.8258	0.539904	11.8258	0.498291
539	11.8478	0.588736	11.8478	0.498291	11.8478	0.498291	11.8478	0.498291	11.8478	0.498291	11.8478	0.539904	11.8478	0.498291
540	11.8699	0.588736	11.8699	0.498291	11.8699	0.498291	11.8699	0.498291	11.8699	0.498291	11.8699	0.539904	11.8699	0.498291
541	11.8919	0.588736	11.8919	0.498291	11.8919	0.498291	11.8919	0.498291	11.8919	0.498291	11.8919	0.539904	11.8919	0.498291
542	11.9139	0.588736	11.9139	0.498291	11.9139	0.498291	11.9139	0.498291	11.9139	0.498291	11.9139	0.539904	11.9139	0.498291
543	11.9359	0.588736	11.9359	0.498291	11.9359	0.498291	11.9359	0.498291	11.9359	0.498291	11.9359	0.539904	11.9359	0.498291
544	11.958	0.588736	11.958	0.498291	11.958	0.498291	11.958	0.498291	11.958	0.498291	11.958	0.539904	11.958	0.498291
545	11.98	0.588736	11.98	0.498291	11.98	0.498291	11.98	0.498291	11.98	0.498291	11.98	0.539904	11.98	0.498291
546	12.002	0.588736	12.002	0.498291	12.002	0.498291	12.002	0.498291	12.002	0.498291	12.002	0.539904	12.002	0.498291
547	12.024	0.588736	12.024	0.498291	12.024	0.498291	12.024	0.498291	12.024	0.498291	12.024	0.539904	12.024	0.498291
548	12.046	0.588736	12.046	0.498291	12.046	0.498291	12.046	0.498291	12.046	0.498291	12.046	0.539904	12.046	0.498291
549	12.0681	0.588736	12.0681	0.498291	12.0681	0.498291	12.0681	0.498291	12.0681	0.498291	12.0681	0.539904	12.0681	0.498291
550	12.0901	0.588736	12.0901	0.498291	12.0901	0.498291	12.0901	0.498291	12.0901	0.498291	12.0901	0.539904	12.0901	0.498291
551	12.1121	0.588736	12.1121	0.498291	12.1121	0.498291	12.1121	0.498291	12.1121	0.498291	12.1121	0.539904	12.1121	0.498291
552	12.1341	0.588736	12.1341	0.498291	12.1341	0.498291	12.1341	0.498291	12.1341	0.498291	12.1341	0.539904	12.1341	0.498291
553	12.1562	0.588736	12.1562	0.498291	12.1562	0.498291	12.1562	0.498291	12.1562	0.498291	12.1562	0.539904	12.1562	0.498291
554	12.1782	0.588736	12.1782	0.498291	12.1782	0.498291	12.1782	0.498291	12.1782	0.498291	12.1782	0.539904	12.1782	0.498291
555	12.2002	0.588736	12.2002	0.498291	12.2002	0.498291	12.2002	0.498291	12.2002	0.498291	12.2002	0.539904	12.2002	0.498291
556	12.2222	0.588736	12.2222	0.498291	12.2222	0.498291	12.2222	0.498291	12.2222	0.498291	12.2222	0.539904	12.2222	0.498291
557	12.2442	0.588736	12.2442	0.498291	12.2442	0.498291	12.2442	0.498291	12.2442	0.498291	12.2442	0.539904	12.2442	0.498291
558	12.2663	0.588736	12.2663	0.498291	12.2663	0.498291	12.2663	0.498291	12.2663	0.498291	12.2663	0.539904	12.2663	0.498291
559	12.2883	0.588736	12.2883	0.498291	12.2883	0.498291	12.2883	0.498291	12.2883	0.498291	12.2883	0.539904	12.2883	0.498291
560	12.3103	0.588736	12.3103	0.498291	12.3103	0.498291	12.3103	0.498291	12.3103	0.498291	12.3103	0.539904	12.3103	0.498291
561	12.3323	0.588736	12.3323	0.498291	12.3323	0.498291	12.3323	0.498291	12.3323	0.498291	12.3323	0.539904	12.3323	0.498291
562	12.3544	0.588736	12.3544	0.498291	12.3544	0.498291	12.3544	0.498291	12.3544	0.498291	12.3544	0.539904	12.3544	0.498291
563	12.3764	0.588736	12.3764	0.498291	12.3764	0.498291	12.3764	0.498291	12.3764	0.498291	12.3764	0.539904	12.3764	0.498291
564	12.3984	0.588736	12.3984	0.498291	12.3984	0.498291	12.3984	0.498291	12.3984	0.498291	12.3984	0.539904	12.3984	0.498291
565	12.4204	0.588736	12.4204	0.498291	12.4204	0.498291	12.4204	0.498291	12.4204	0.498291	12.4204	0.539904	12.4204	0.498291
566	12.4424	0.588736	12.4424	0.498291	12.4424	0.498291	12.4424	0.498291	12.4424	0.498291	12.4424	0.539904	12.4424	0.498291
567	12.4645	0.588736	12.4645	0.498291	12.4645	0.498291	12.4645	0.498291	12.4645	0.498291	12.4645	0.539904	12.4645	0.498291
568	12.4865	0.588736	12.4865	0.498291	12.4865	0.498291	12.4865	0.498291	12.4865	0.498291	12.4865	0.539904	12.4865	0.498291
569	12.5085	0.588736	12.5085	0.498291	12.5085	0.498291	12.5085	0.498291	12.5085	0.498291	12.5085	0.539904	12.5085	0.498291
570	12.5305	0.588736	12.5305	0.498291	12.5305	0.498291	12.5305	0.498291	12.5305	0.498291	12.5305	0.539904	12.5305	0.498291
571	12.5526	0.588736	12.5526	0.498291	12.5526	0.498291	12.5526	0.498291	12.5526	0.498291	12.5526	0.539904	12.5526	0.498291
572	12.5746	0.588736	12.5746	0.498291	12.5746	0.498291	12.5746	0.498291	12.5746	0.498291	12.5746	0.539904	12.5746	0.498291
573	12.5966	0.588736	12.5966	0.498291	12.5966	0.498291	12.5966	0.498291	12.5966	0.498291	12.5966	0.539904	12.5966	0.498291
574	12.6186	0.588736	12.6186	0.498291	12.6186	0.498291	12.6186	0.498291	12.6186	0.498291	12.6186	0.539904	12.6186	0.498291
575	12.6406	0.588736	12.6406	0.498291	12.6406	0.498291	12.6406	0.498291	12.6406	0.498291	12.6406	0.539904	12.6406	0.498291
576	12.6627	0.588736	12.6627	0.498291	12.6627	0.498291	12.6627	0.498291	12.6627	0.498291	12.6627	0.539904	12.6627	0.498291
577	12.6847	0.588736	12.6847	0.498291	12.6847	0.498291	12.6847	0.498291	12.6847	0.498291	12.6847	0.539904	12.6847	0.498291
578	12.7067	0.588736	12.7067	0.498291	12.7067	0.498291	12.7067	0.498291	12.7067	0.498291	12.7067	0.539904	12.7067	0.498291
579	12.7287	0.588736	12.7287	0.498291	12.7287	0.498291	12.7287	0.498291	12.7287	0.498291	12.7287	0.539904	12.7287	0.498291
580	12.7508	0.588736	12.7508	0.498291	12.7508	0.498291	12.7508	0.498291	12.7508	0.498291	12.7508	0.539904	12.7508	0.498291
581	12.7728	0.588736	12.7728	0.498291	12.7728	0.498291	12.7728	0.498291	12.7728	0.498291	12.7728	0.539904	12.7728	0.498291
582	12.7948	0.588736	12.7948	0.498291	12.7948	0.498291	12.7948	0.498291	12.7948	0.498291	12.7948	0.539904	12.7948	0.498291
583	12.8168	0.588736	12.8168	0.498291	12.8168	0.498291	12.8168	0.498291	12.8168	0.498291	12.8168	0.539904	12.8168	0.498291
584	12.8388	0.588736	12.8388	0.498291	12.8388	0.498291	12.8388	0.498291	12.8388	0.498291	12.8388	0.539904	12.8388	0.498291
585	12.8609	0.588736	12.8609	0.498291	12.8609	0.498291	12.8609	0.498291	12.8609	0.498291	12.8609	0.539904	12.8609	0.498291
586	12.8829	0.588736	12.8829	0.498291	12.8829	0.498291	12.8829	0.498291	12.8829	0.498291	12.8829	0.539904	12.8829	0.498291
587	12.9049	0.588736	12.9049	0.498291	12.9049	0.498291	12.9049	0.498291	12.9049	0.498291	12.9049	0.539904	12.9049	0.498291
588	12.9269	0.588736	12.9269	0.498291	12.9269	0.498291	12.9269	0.498291	12.9269	0.498291	12.9269	0.539904	12.9269	0.498291
589	12.9489	0.588736	12.9489	0.498291	12.9489	0.498291	12.9489	0.498291	12.9489	0.498291	12.9489	0.539904	12.9489	0.498291
590	12.971	0.498291	12.971	0.404905	12.971	0.404905	12.971	0.404905	12.971	0.404905	12.971	0.438719	12.971	0.404905
591	12.993	0.498291	12.993	0.404905	12.993	0.404905	12.993	0.404905	12.993	0.404905	12.993	0.438719	12.993	0.404905
592	13.015	0.498291	13.015	0.404905	13.015	0.404905	13.015	0.404905	13.015	0.404905	13.015	0.438719	13.015	0.404905
593	13.037	0.498291	13.037	0.404905	13.037	0.404905	13.037	0.404905	13.037	0.404905	13.037	0.438719	13.037	0.404905
594	13.0591	0.498291	13.0591	0.404905	13.0591	0.404905	13.0591	0.404905	13.0591	0.404905	13.0591	0.438719	13.0591	0.404905
595	13.0811	0.498291	13.0811	0.404905	13.0811	0.404905	13.0811	0.404905	13.0811	0.404905	13.0811	0.438719	13.0811	0.404905
596	13.1031	0.498291	13.1031	0.404905	13.1031	0.404905	13.1031	0.404905	13.1031	0.404905	13.1031	0.438719	13.1031	0.404905
597	13.1251	0.498291	13.1251	0.404905	13.1251	0.404905	13.1251	0.404905	13.1251	0.404905	13.1251	0.438719	13.1251	0.404905
598	13.1471	0.498291	13.1471	0.404905	13.1471	0.404905	13.1471	0.404905	13.1471	0.404905	13.1471	0.438719	13.1471	0.404905
599	13.1692	0.498291	13.1692	0.404905	13.1692	0.404905	13.1692	0.404905	13.1692	0.404905	13.1692	0.438719	13.1692	0.404905
600	13.1912	0.498291	13.1912	0.404905	13.1912	0.404905	13.1912	0.404905	13.1912	0.404905	13.1912	0.438719	13.1912	0.404905
601	13.2132	0.498291	13.2132	0.404905	13.2132	0.404905	13.2132	0.404905	13.2132	0.404905	13.2132	0.438719	13.2132	0.404905
602	13.2352	0.498291	13.2352	0.404905	13.2352	0.404905	13.2352	0.404905	13.2352	0.404905	13.2352	0.438719	13.2352	0.404905
603	13.2573	0.498291	13.2573	0.404905	13.2573	0.404905	13.2573	0.404905	13.2573	0.404905	13.2573	0.438719	13.2573	0.404905
604	13.2793	0.498291	13.2793	0.404905	13.2793	0.404905	13.2793	0.404905	13.2793	0.404905	13.2793	0.438719	13.2793	0.404905
605	13.3013	0.498291	13.3013	0.404905	13.3013	0.404905	13.3013	0.404905	13.3013	0.404905	13.3013	0.438719	13.3013	0.404905
606	13.3233	0.498291	13.3233	0.404905	13.3233	0.404905	13.3233	0.404905	13.3233	0.404905	13.3233	0.438719	13.3233	0.404905
607	13.3453	0.498291	13.3453	0.404905	13.3453	0.404905	13.3453	0.404905	13.3453	0.404905	13.3453	0.438719	13.3453	0.404905
608	13.3674	0.498291	13.3674	0.404905	13.3674	0.404905	13.3674	0.404905	13.3674	0.404905	13.3674	0.438719	13.3674	0.404905
609	13.3894	0.498291	13.3894	0.404905	13.3894	0.404905	13.3894	0.404905	13.3894	0.404905	13.3894	0.438719	13.3894	0.404905
610	13.4114	0.498291	13.4114	0.404905	13.4114	0.404905	13.4114	0.404905	13.4114	0.404905	13.4114	0.438719	13.4114	0.404905
611	13.4334	0.498291	13.4334	0.404905	13.4334	0.404905	13.4334	0.404905	13.4334	0.404905	13.4334	0.438719	13.4334	0.404905
612	13.4555	0.498291	13.4555	0.404905	13.4555	0.404905	13.4555	0.404905	13.4555	0.404905	13.4555	0.438719	13.4555	0.404905
613	13.4775	0.498291	13.4775	0.404905	13.4775	0.404905	13.4775	0.404905	13.4775	0.404905	13.4775	0.438719	13.4775	0.404905
614	13.4995	0.498291	13.4995	0.404905	13.4995	0.404905	13.4995	0.404905	13.4995	0.404905	13.4995	0.438719	13.4995	0.404905
615	13.5215	0.498291	13.5215	0.404905	13.5215	0.404905	13.5215	0.404905	13.5215	0.404905	13.5215	0.438719	13.5215	0.404905
616	13.5435	0.498291	13.5435	0.404905	13.5435	0.404905	13.5435	0.404905	13.5435	0.404905	13.5435	0.438719	13.5435	0.404905
617	13.5656	0.498291	13.5656	0.404905	13.5656	0.404905	13.5656	0.404905	13.5656	0.404905	13.5656	0.438719	13.5656	0.404905
618	13.5876	0.498291	13.5876	0.404905	13.5876	0.404905	13.5876	0.404905	13.5876	0.404905	13.5876	0.438719	13.5876	0.404905
619	13.6096	0.498291	13.6096	0.404905	13.6096	0.404905	13.6096	0.404905	13.6096	0.404905	13.6096	0.438719	13.6096	0.404905
620	13.6316	0.498291	13.6316	0.404905	13.6316	0.404905	13.6316	0.404905	13.6316	0.404905	13.6316	0.438719	13.6316	0.404905
621	13.6537	0.498291	13.6537	0.404905	13.6537	0.404905	13.6537	0.404905	13.6537	0.404905	13.6537	0.438719	13.6537	0.404905
622	13.6757	0.498291	13.6757	0.404905	13.6757	0.404905	13.6757	0.404905	13.6757	0.404905	13.6757	0.438719	13.6757	0.404905
623	13.6977	0.498291	13.6977	0.404905	13.6977	0.404905	13.6977	0.404905	13.6977	0.404905	13.6977	0.438719	13.6977	0.404905
624	13.7197	0.498291	13.7197	0.404905	13.7197	0.404905	13.7197	0.404905	13.7197	0.404905	13.7197	0.438719	13.7197	0.404905
625	13.7417	0.498291	13.7417	0.404905	13.7417	0.404905	13.7417	0.404905	13.7417	0.404905	13.7417	0.438719	13.7417	0.404905
626	13.7638	0.498291	13.7638	0.404905	13.7638	0.404905	13.7638	0.404905	13.7638	0.404905	13.7638	0.438719	13.7638	0.404905
627	13.7858	0.498291	13.7858	0.404905	13.7858	0.404905	13.7858	0.404905	13.7858	0.404905	13.7858	0.438719	13.7858	0.404905
628	13.8078	0.498291	13.8078	0.404905	13.8078	0.404905	13.8078	0.404905	13.8078	0.404905	13.8078	0.438719	13.8078	0.404905
629	13.8298	0.498291	13.8298	0.404905	13.8298	0.404905	13.8298	0.404905	13.8298	0.404905	13.8298	0.438719	13.8298	0.404905
630	13.8519	0.498291	13.8519	0.404905	13.8519	0.404905	13.8519	0.404905	13.8519	0.404905	13.8519	0.438719	13.8519	0.404905
631	13.8739	0.498291	13.8739	0.404905	13.8739	0.404905	13.8739	0.404905	13.8739	0.404905	13.8739	0.438719	13.8739	0.404905
632	13.8959	0.498291	13.8959	0.404905	13.8959	0.404905	13.8959	0.404905	13.8959	0.404905	13.8959	0.438719	13.8959	0.404905
633	13.9179	0.498291	13.9179	0.404905	13.9179	0.404905	13.9179	0.404905	13.9179	0.404905	13.9179	0.438719	13.9179	0.404905
634	13.9399	0.498291	13.9399	0.404905	13.9399	0.404905	13.9399	0.404905	13.9399	0.404905	13.9399	0.438719	13.9399	0.404905
635	13.962	0.498291	13.962	0.404905	13.962	0.404905	13.962	0.404905	13.962	0.404905	13.962	0.438719	13.962	0.404905
636	13.984	0.498291	13.984	0.404905	13.984	0.404905	13.984	0.404905	13.984	0.404905	13.984	0.438719	13.984	0.404905
637	14.006	0.498291	14.006	0.404905	14.006	0.404905	14.006	0.404905	14.006	0.404905	14.006	0.438719	14.006	0.404905
638	14.028	0.498291	14.028	0.404905	14.028	0.404905	14.028	0.404905	14.028	0.404905	14.028	0.438719	14.028	0.404905
639	14.0501	0.498291	14.0501	0.404905	14.0501	0.404905	14.0501	0.404905	14.0501	0.404905	14.0501	0.438719	14.0501	0.404905
640	14.0721	0.498291	14.0721	0.404905	14.0721	0.404905	14.0721	0.404905	14.0721	0.404905	14.0721	0.438719	14.0721	0.404905
641	14.0941	0.498291	14.0941	0.404905	14.0941	0.404905	14.0941	0.404905	14.0941	0.404905	14.0941	0.438719	14.0941	0.404905
642	14.1161	0.498291	14.1161	0.404905	14.1161	0.404905	14.1161	0.404905	14.1161	0.404905	14.1161	0.438719	14.1161	0.404905
643	14.1381	0.498291	14.1381	0.404905	14.1381	0.404905	14.1381	0.404905	14.1381	0.404905	14.1381	0.438719	14.1381	0.404905
644	14.1602	0.498291	14.1602	0.404905	14.1602	0.404905	14.1602	0.404905	14.1602	0.404905	14.1602	0.438719	14.1602	0.404905
645	14.1822	0.498291	14.1822	0.404905	14.1822	0.404905	14.1822	0.404905	14.1822	0.404905	14.1822	0.438719	14.1822	0.404905
646	14.2042	0.498291	14.2042	0.404905	14.2042	0.404905	14.2042	0.404905	14.2042	0.404905	14.2042	0.438719	14.2042	0.404905
647	14.2262	0.498291	14.2262	0.404905	14.2262	0.404905	14.2262	0.404905	14.2262	0.404905	14.2262	0.438719	14.2262	0.404905
648	14.2482	0.498291	14.2482	0.404905	14.2482	0.404905	14.2482	0.404905	14.2482	0.404905	14.2482	0.438719	14.2482	0.404905
649	14.2703	0.498291	14.2703	0.404905	14.2703	0.404905	14.2703	0.404905	14.2703	0.404905	14.2703	0.438719	14.2703	0.404905
650	14.2923	0.498291	14.2923	0.404905	14.2923	0.404905	14.2923	0.404905	14.2923	0.404905	14.2923	0.438719	14.2923	0.404905
651	14.3143	0.498291	14.3143	0.404905	14.3143	0.404905	14.3143	0.404905	14.3143	0.404905	14.3143	0.438719	14.3143	0.404905
652	14.3363	0.498291	14.3363	0.404905	14.3363	0.404905	14.3363	0.404905	14.3363	0.404905	14.3363	0.438719	14.3363	0.404905
653	14.3584	0.498291	14.3584	0.404905	14.3584	0.404905	14.3584	0.404905	14.3584	0.404905	14.3584	0.438719	14.3584	0.404905
654	14.3804	0.498291	14.3804	0.404905	14.3804	0.404905	14.3804	0.404905	14.3804	0.404905	14.3804	0.438719	14.3804	0.404905
655	14.4024	0.498291	14.4024	0.404905	14.4024	0.404905	14.4024	0.404905	14.4024	0.404905	14.4024	0.438719	14.4024	0.404905
656	14.4244	0.498291	14.4244	0.404905	14.4244	0.404905	14.4244	0.404905	14.4244	0.404905	14.4244	0.438719	14.4244	0.404905
657	14.4464	0.498291	14.4464	0.404905	14.4464	0.404905	14.4464	0.404905	14.4464	0.404905	14.4464	0.438719	14.4464	0.404905
658	14.4685	0.498291	14.4685	0.404905	14.4685	0.404905	14.4685	0.404905	14.4685	0.404905	14.4685	0.438719	14.4685	0.404905
659	14.4905	0.498291	14.4905	0.404905	14.4905	0.404905	14.4905	0.404905	14.4905	0.404905	14.4905	0.438719	14.4905	0.404905
660	14.5125	0.498291	14.5125	0.404905	14.5125	0.404905	14.5125	0.404905	14.5125	0.404905	14.5125	0.438719	14.5125	0.404905
661	14.5345	0.498291	14.5345	0.404905	14.5345	0.404905	14.5345	0.404905	14.5345	0.404905	14.5345	0.438719	14.5345	0.404905
662	14.5566	0.498291	14.5566	0.404905	14.5566	0.404905	14.5566	0.404905	14.5566	0.404905	14.5566	0.438719	14.5566	0.404905
663	14.5786	0.498291	14.5786	0.404905	14.5786	0.404905	14.5786	0.404905	14.5786	0.404905	14.5786	0.438719	14.5786	0.404905
664	14.6006	0.498291	14.6006	0.404905	14.6006	0.404905	14.6006	0.404905	14.6006	0.404905	14.6006	0.438719	14.6006	0.404905
665	14.6226	0.498291	14.6226	0.404905	14.6226	0.404905	14.6226	0.404905	14.6226	0.404905	14.6226	0.438719	14.6226	0.404905
666	14.6446	0.498291	14.6446	0.404905	14.6446	0.404905	14.6446	0.404905	14.6446	0.404905	14.6446	0.438719	14.6446	0.404905
667	14.6667	0.498291	14.6667	0.404905	14.6667	0.404905	14.6667	0.404905	14.6667	0.404905	14.6667	0.438719	14.6667	0.404905
668	14.6887	0.498291	14.6887	0.404905	14.6887	0.404905	14.6887	0.404905	14.6887	0.404905	14.6887	0.438719	14.6887	0.404905
669	14.7107	0.498291	14.7107	0.404905	14.7107	0.404905	14.7107	0.404905	14.7107	0.404905	14.7107	0.438719	14.7107	0.404905
670	14.7327	0.498291	14.7327	0.404905	14.7327	0.404905	14.7327	0.404905	14.7327	0.404905	14.7327	0.438719	14.7327	0.404905
671	14.7548	0.498291	14.7548	0.404905	14.7548	0.404905	14.7548	0.404905	14.7548	0.404905	14.7548	0.438719	14.7548	0.404905
672	14.7768	0.498291	14.7768	0.404905	14.7768	0.404905	14.7768	0.404905	14.7768	0.404905	14.7768	0.438719	14.7768	0.404905
673	14.7988	0.498291	14.7988	0.404905	14.7988	0.404905	14.7988	0.404905	14.7988	0.404905	14.7988	0.438719	14.7988	0.404905
674	14.8208	0.498291	14.8208	0.404905	14.8208	0.404905	14.8208	0.404905	14.8208	0.404905	14.8208	0.438719	14.8208	0.404905
675	14.8428	0.498291	14.8428	0.404905	14.8428	0.404905	14.8428	0.404905	14.8428	0.404905	14.8428	0.438719	14.8428	0.404905
676	14.8649	0.498291	14.8649	0.404905	14.8649	0.404905	14.8649	0.404905	14.8649	0.404905	14.8649	0.438719	14.8649	0.404905
677	14.8869	0.498291	14.8869	0.404905	14.8869	0.404905	14.8869	0.404905	14.8869	0.404905	14.8869	0.438719	14.8869	0.404905
678	14.9089	0.498291	14.9089	0.404905	14.9089	0.404905	14.9089	0.404905	14.9089	0.404905	14.9089	0.438719	14.9089	0.404905
679	14.9309	0.498291	14.9309	0.404905	14.9309	0.404905	14.9309	0.404905	14.9309	0.404905	14.9309	0.438719	14.9309	0.404905
680	14.953	0.498291	14.953	0.404905	14.953	0.404905	14.953	0.404905	14.953	0.404905	14.953	0.438719	14.953	0.404905
681	14.975	0.498291	14.975	0.404905	14.975	0.404905	14.975	0.404905	14.975	0.404905	14.975	0.438719	14.975	0.404905
682	14.997	0.498291	14.997	0.404905	14.997	0.404905	14.997	0.404905	14.997	0.404905	14.997	0.438719	14.997	0.404905
683	15.019	0.498291	15.019	0.404905	15.019	0.404905	15.019	0.404905	15.019	0.404905	15.019	0.438719	15.019	0.404905
684	15.041	0.498291	15.041	0.404905	15.041	0.404905	15.041	0.404905	15.041	0.404905	15.041	0.438719	15.041	0.404905
685	15.0631	0.498291	15.0631	0.404905	15.0631	0.404905	15.0631	0.404905	15.0631	0.404905	15.0631	0.438719	15.0631	0.404905
686	15.0851	0.498291	15.0851	0.404905	15.0851	0.404905	15.0851	0.404905	15.0851	0.404905	15.0851	0.438719	15.0851	0.404905
687	15.1071	0.498291	15.1071	0.404905	15.1071	0.404905	15.1071	0.404905	15.1071	0.404905	15.1071	0.438719	15.1071	0.404905
688	15.1291	0.498291	15.1291	0.404905	15.1291	0.404905	15.1291	0.404905	15.1291	0.404905	15.1291	0.438719	15.1291	0.404905
689	15.1512	0.498291	15.1512	0.404905	15.1512	0.404905	15.1512	0.404905	15.1512	0.404905	15.1512	0.438719	15.1512	0.404905
690	15.1732	0.498291	15.1732	0.404905	15.1732	0.404905	15.1732	0.404905	15.1732	0.404905	15.1732	0.438719	15.1732	0.404905
691	15.1952	0.498291	15.1952	0.404905	15.1952	0.404905	15.1952	0.404905	15.1952	0.404905	15.1952	0.438719	15.1952	0.404905
692	15.2172	0.498291	15.2172	0.404905	15.2172	0.404905	15.2172	0.404905	15.2172	0.404905	15.2172	0.438719	15.2172	0.404905
693	15.2392	0.498291	15.2392	0.404905	15.2392	0.404905	15.2392	0.404905	15.2392	0.404905	15.2392	0.438719	15.2392	0.404905
694	15.2613	0.498291	15.2613	0.404905	15.2613	0.404905	15.2613	0.404905	15.2613	0.404905	15.2613	0.438719	15.2613	0.404905
695	15.2833	0.498291	15.2833	0.404905	15.2833	0.404905	15.2833	0.404905	15.2833	0.404905	15.2833	0.438719	15.2833	0.404905
696	15.3053	0.498291	15.3053	0.404905	15.3053	0.404905	15.3053	0.404905	15.3053	0.404905	15.3053	0.438719	15.3053	0.404905
697	15.3273	0.498291	15.3273	0.404905	15.3273	0.404905	15.3273	0.404905	15.3273	0.404905	15.3273	0.438719	15.3273	0.404905
698	15.3493	0.498291	15.3493	0.404905	15.3493	0.404905	15.3493	0.404905	15.3493	0.404905	15.3493	0.438719	15.3493	0.404905
699	15.3714	0.498291	15.3714	0.404905	15.3714	0.404905	15.3714	0.404905	15.3714	0.404905	15.3714	0.438719	15.3714	0.404905
700	15.3934	0.498291	15.3934	0.404905	15.3934	0.404905	15.3934	0.404905	15.3934	0.404905	15.3934	0.438719	15.3934	0.404905
701	15.4154	0.498291	15.4154	0.404905	15.4154	0.404905	15.4154	0.404905	15.4154	0.404905	15.4154	0.438719	15.4154	0.404905
702	15.4374	0.498291	15.4374	0.404905	15.4374	0.404905	15.4374	0.404905	15.4374	0.404905	15.4374	0.438719	15.4374	0.404905
703	15.4595	0.498291	15.4595	0.404905	15.4595	0.404905	15.4595	0.404905	15.4595	0.404905	15.4595	0.438719	15.4595	0.404905
704	15.4815	0.498291	15.4815	0.404905	15.4815	0.404905	15.4815	0.404905	15.4815	0.404905	15.4815	0.438719	15.4815	0.404905
705	15.5035	0.498291	15.5035	0.404905	15.5035	0.404905	15.5035	0.404905	15.5035	0.404905	15.5035	0.438719	15.5035	0.404905
706	15.5255	0.498291	15.5255	0.404905	15.5255	0.404905	15.5255	0.404905	15.5255	0.404905	15.5255	0.438719	15.5255	0.404905
707	15.5475	0.498291	15.5475	0.404905	15.5475	0.404905	15.5475	0.404905	15.5475	0.404905	15.5475	0.438719	15.5475	0.404905
708	15.5696	0.498291	15.5696	0.404905	15.5696	0.404905	15.5696	0.404905	15.5696	0.404905	15.5696	0.438719	15.5696	0.404905
709	15.5916	0.498291	15.5916	0.404905	15.5916	0.404905	15.5916	0.404905	15.5916	0.404905	15.5916	0.438719	15.5916	0.404905
710	15.6136	0.498291	15.6136	0.404905	15.6136	0.404905	15.6136	0.404905	15.6136	0.404905	15.6136	0.438719	15.6136	0.404905
711	15.6356	0.498291	15.6356	0.404905	15.6356	0.404905	15.6356	0.404905	15.6356	0.404905	15.6356	0.438719	15.6356	0.404905
712	15.6577	0.498291	15.6577	0.404905	15.6577	0.404905	15.6577	0.404905	15.6577	0.404905	15.6577	0.438719	15.6577	0.404905
713	15.6797	0.498291	15.6797	0.404905	15.6797	0.404905	15.6797	0.404905	15.6797	0.404905	15.6797	0.438719	15.6797	0.404905
714	15.7017	0.498291	15.7017	0.404905	15.7017	0.404905	15.7017	0.404905	15.7017	0.404905	15.7017	0.438719	15.7017	0.404905
715	15.7237	0.498291	15.7237	0.404905	15.7237	0.404905	15.7237	0.404905	15.7237	0.404905	15.7237	0.438719	15.7237	0.404905
716	15.7457	0.498291	15.7457	0.404905	15.7457	0.404905	15.7457	0.404905	15.7457	0.404905	15.7457	0.438719	15.7457	0.404905
717	15.7678	0.498291	15.7678	0.404905	15.7678	0.404905	15.7678	0.404905	15.7678	0.404905	15.7678	0.438719	15.7678	0.404905
718	15.7898	0.498291	15.7898	0.404905	15.7898	0.404905	15.7898	0.404905	15.7898	0.404905	15.7898	0.438719	15.7898	0.404905
719	15.8118	0.498291	15.8118	0.404905	15.8118	0.404905	15.8118	0.404905	15.8118	0.404905	15.8118	0.438719	15.8118	0.404905
720	15.8338	0.498291	15.8338	0.404905	15.8338	0.404905	15.8338	0.404905	15.8338	0.404905	15.8338	0.438719	15.8338	0.404905
721	15.8559	0.498291	15.8559	0.404905	15.8559	0.404905	15.8559	0.404905	15.8559	0.404905	15.8559	0.438719	15.8559	0.404905
722	15.8779	0.498291	15.8779	0.404905	15.8779	0.404905	15.8779	0.404905	15.8779	0.404905	15.8779	0.438719	15.8779	0.404905
723	15.8999	0.498291	15.8999	0.404905	15.8999	0.404905	15.8999	0.404905	15.8999	0.404905	15.8999	0.438719	15.8999	0.404905
724	15.9219	0.498291	15.9219	0.404905	15.9219	0.404905	15.9219	0.404905	15.9219	0.404905	15.9219	0.438719	15.9219	0.404905
725	15.9439	0.498291	15.9439	0.404905	15.9439	0.404905	15.9439	0.404905	15.9439	0.404905	15.9439	0.438719	15.9439	0.404905
726	15.966	0.498291	15.966	0.404905	15.966	0.404905	15.966	0.404905	15.966	0.404905	15.966	0.438719	15.966	0.404905
727	15.988	0.498291	15.988	0.404905	15.988	0.404905	15.988	0.404905	15.988	0.404905	15.988	0.438719	15.988	0.404905
728	16.01	0.498291	16.01	0.404905	16.01	0.404905	16.01	0.404905	16.01	0.404905	16.01	0.438719	16.01	0.404905
729	16.032	0.498291	16.032	0.404905	16.032	0.404905	16.032	0.404905	16.032	0.404905	16.032	0.438719	16.032	0.404905
730	16.0541	0.498291	16.0541	0.404905	16.0541	0.404905	16.0541	0.404905	16.0541	0.404905	16.0541	0.438719	16.0541	0.404905
731	16.0761	0.498291	16.0761	0.404905	16.0761	0.404905	16.0761	0.404905	16.0761	0.404905	16.0761	0.438719	16.0761	0.404905
732	16.0981	0.498291	16.0981	0.404905	16.0981	0.404905	16.0981	0.404905	16.0981	0.404905	16.0981	0.438719	16.0981	0.404905
733	16.1201	0.498291	16.1201	0.404905	16.1201	0.404905	16.1201	0.404905	16.1201	0.404905	16.1201	0.438719	16.1201	0.404905
734	16.1421	0.498291	16.1421	0.404905	16.1421	0.404905	16.1421	0.404905	16.1421	0.404905	16.1421	0.438719	16.1421	0.404905
735	16.1642	0.498291	16.1642	0.404905	16.1642	0.404905	16.1642	0.404905	16.1642	0.404905	16.1642	0.438719	16.1642	0.404905
736	16.1862	0.498291	16.1862	0.404905	16.1862	0.404905	16.1862	0.404905	16.1862	0.404905	16.1862	0.438719	16.1862	0.404905
737	16.2082	0.498291	16.2082	0.404905	16.2082	0.404905	16.2082	0.404905	16.2082	0.404905	16.2082	0.438719	16.2082	0.404905
738	16.2302	0.498291	16.2302	0.404905	16.2302	0.404905	16.2302	0.404905	16.2302	0.404905	16.2302	0.438719	16.2302	0.404905
739	16.2523	0.498291	16.2523	0.404905	16.2523	0.404905	16.2523	0.404905	16.2523	0.404905	16.2523	0.438719	16.2523	0.404905
740	16.2743	0.498291	16.2743	0.404905	16.2743	0.404905	16.2743	0.404905	16.2743	0.404905	16.2743	0.438719	16.2743	0.404905
741	16.2963	0.498291	16.2963	0.404905	16.2963	0.404905	16.2963	0.404905	16.2963	0.404905	16.2963	0.438719	16.2963	0.404905
742	16.3183	0.498291	16.3183	0.404905	16.3183	0.404905	16.3183	0.404905	16.3183	0.404905	16.3183	0.438719	16.3183	0.404905
743	16.3403	0.498291	16.3403	0.404905	16.3403	0.404905	16.3403	0.404905	16.3403	0.404905	16.3403	0.438719	16.3403	0.404905
744	16.3624	0.498291	16.3624	0.404905	16.3624	0.404905	16.3624	0.404905	16.3624	0.404905	16.3624	0.438719	16.3624	0.404905
745	16.3844	0.498291	16.3844	0.404905	16.3844	0.404905	16.3844	0.404905	16.3844	0.404905	16.3844	0.438719	16.3844	0.404905
746	16.4064	0.498291	16.4064	0.404905	16.4064	0.404905	16.4064	0.404905	16.4064	0.404905	16.4064	0.438719	16.4064	0.404905
747	16.4284	0.498291	16.4284	0.404905	16.4284	0.404905	16.4284	0.404905	16.4284	0.404905	16.4284	0.438719	16.4284	0.404905
748	16.4505	0.498291	16.4505	0.404905	16.4505	0.404905	16.4505	0.404905	16.4505	0.404905	16.4505	0.438719	16.4505	0.404905
749	16.4725	0.498291	16.4725	0.404905	16.4725	0.404905	16.4725	0.404905	16.4725	0.404905	16.4725	0.438719	16.4725	0.404905
750	16.4945	0.498291	16.4945	0.404905	16.4945	0.404905	16.4945	0.404905	16.4945	0.404905	16.4945	0.438719	16.4945	0.404905
751	16.5165	0.498291	16.5165	0.404905	16.5165	0.404905	16.5165	0.404905	16.5165	0.404905	16.5165	0.438719	16.5165	0.404905
752	16.5385	0.498291	16.5385	0.404905	16.5385	0.404905	16.5385	0.404905	16.5385	0.404905	16.5385	0.438719	16.5385	0.404905
753	16.5606	0.498291	16.5606	0.404905	16.5606	0.404905	16.5606	0.404905	16.5606	0.404905	16.5606	0.438719	16.5606	0.404905
754	16.5826	0.498291	16.5826	0.404905	16.5826	0.404905	16.5826	0.404905	16.5826	0.404905	16.5826	0.438719	16.5826	0.404905
755	16.6046	0.498291	16.6046	0.404905	16.6046	0.404905	16.6046	0.404905	16.6046	0.404905	16.6046	0.438719	16.6046	0.404905
756	16.6266	0.498291	16.6266	0.404905	16.6266	0.404905	16.6266	0.404905	16.6266	0.404905	16.6266	0.438719	16.6266	0.404905
757	16.6486	0.498291	16.6486	0.404905	16.6486	0.404905	16.6486	0.404905	16.6486	0.404905	16.6486	0.438719	16.6486	0.404905
758	16.6707	0.498291	16.6707	0.404905	16.6707	0.404905	16.6707	0.404905	16.6707	0.404905	16.6707	0.438719	16.6707	0.404905
759	16.6927	0.498291	16.6927	0.404905	16.6927	0.404905	16.6927	0.404905	16.6927	0.404905	16.6927	0.438719	16.6927	0.404905
760	16.7147	0.498291	16.7147	0.404905	16.7147	0.404905	16.7147	0.404905	16.7147	0.404905	16.7147	0.438719	16.7147	0.404905
761	16.7367	0.498291	16.7367	0.404905	16.7367	0.404905	16.7367	0.404905	16.7367	0.404905	16.7367	0.438719	16.7367	0.404905
762	16.7588	0.498291	16.7588	0.404905	16.7588	0.404905	16.7588	0.404905	16.7588	0.404905	16.7588	0.438719	16.7588	0.404905
763	16.7808	0.498291	16.7808	0.404905	16.7808	0.404905	16.7808	0.404905	16.7808	0.404905	16.7808	0.438719	16.7808	0.404905
764	16.8028	0.498291	16.8028	0.404905	16.8028	0.404905	16.8028	0.404905	16.8028	0.404905	16.8028	0.438719	16.8028	0.404905
765	16.8248	0.498291	16.8248	0.404905	16.8248	0.404905	16.8248	0.404905	16.8248	0.404905	16.8248	0.438719	16.8248	0.404905
766	16.8468	0.498291	16.8468	0.404905	16.8468	0.404905	16.8468	0.404905	16.8468	0.404905	16.8468	0.438719	16.8468	0.404905
767	16.8689	0.498291	16.8689	0.404905	16.8689	0.404905	16.8689	0.404905	16.8689	0.404905	16.8689	0.438719	16.8689	0.404905
768	16.8909	0.498291	16.8909	0.404905	16.8909	0.404905	16.8909	0.404905	16.8909	0.404905	16.8909	0.438719	16.8909	0.404905
769	16.9129	0.498291	16.9129	0.404905	16.9129	0.404905	16.9129	0.404905	16.9129	0.404905	16.9129	0.438719	16.9129	0.404905
770	16.9349	0.498291	16.9349	0.404905	16.9349	0.404905	16.9349	0.404905	16.9349	0.404905	16.9349	0.438719	16.9349	0.404905
771	16.957	0.498291	16.957	0.404905	16.957	0.404905	16.957	0.404905	16.957	0.404905	16.957	0.438719	16.957	0.404905
772	16.979	0.498291	16.979	0.404905	16.979	0.404905	16.979	0.404905	16.979	0.404905	16.979	0.438719	16.979	0.404905
773	17.001	0.498291	17.001	0.404905	17.001	0.404905	17.001	0.404905	17.001	0.404905	17.001	0.438719	17.001	0.404905
774	17.023	0.498291	17.023	0.404905	17.023	0.404905	17.023	0.404905	17.023	0.404905	17.023	0.438719	17.023	0.404905
775	17.045	0.498291	17.045	0.404905	17.045	0.404905	17.045	0.404905	17.045	0.404905	17.045	0.438719	17.045	0.404905
776	17.0671	0.498291	17.0671	0.404905	17.0671	0.404905	17.0671	0.404905	17.0671	0.404905	17.0671	0.438719	17.0671	0.404905
777	17.0891	0.498291	17.0891	0.404905	17.0891	0.404905	17.0891	0.404905	17.0891	0.404905	17.0891	0.438719	17.0891	0.404905
778	17.1111	0.498291	17.1111	0.404905	17.1111	0.404905	17.1111	0.404905	17.1111	0.404905	17.1111	0.438719	17.1111	0.404905
779	17.1331	0.498291	17.1331	0.404905	17.1331	0.404905	17.1331	0.404905	17.1331	0.404905	17.1331	0.438719	17.1331	0.404905
780	17.1552	0.498291	17.1552	0.404905	17.1552	0.404905	17.1552	0.404905	17.1552	0.404905	17.1552	0.438719	17.1552	0.404905
781	17.1772	0.498291	17.1772	0.404905	17.1772	0.404905	17.1772	0.404905	17.1772	0.404905	17.1772	0.438719	17.1772	0.404905
782	17.1992	0.498291	17.1992	0.404905	17.1992	0.404905	17.1992	0.404905	17.1992	0.404905	17.1992	0.438719	17.1992	0.404905
783	17.2212	0.498291	17.2212	0.404905	17.2212	0.404905	17.2212	0.404905	17.2212	0.404905	17.2212	0.438719	17.2212	0.404905
784	17.2432	0.498291	17.2432	0.404905	17.2432	0.404905	17.2432	0.404905	17.2432	0.404905	17.2432	0.438719	17.2432	0.404905
785	17.2653	0.498291	17.2653	0.404905	17.2653	0.404905	17.2653	0.404905	17.2653	0.404905	17.2653	0.438719	17.2653	0.404905
786	17.2873	0.498291	17.2873	0.404905	17.2873	0.404905	17.2873	0.404905	17.2873	0.404905	17.2873	0.438719	17.2873	0.404905
787	17.3093	0.498291	17.3093	0.404905	17.3093	0.404905	17.3093	0.404905	17.3093	0.404905	17.3093	0.438719	17.3093	0.404905
788	17.3313	0.498291	17.3313	0.404905	17.3313	0.404905	17.3313	0.404905	17.3313	0.404905	17.3313	0.438719	17.3313	0.404905
789	17.3534	0.498291	17.3534	0.404905	17.3534	0.404905	17.3534	0.404905	17.3534	0.404905	17.3534	0.438719	17.3534	0.404905
790	17.3754	0.498291	17.3754	0.404905	17.3754	0.404905	17.3754	0.404905	17.3754	0.404905	17.3754	0.438719	17.3754	0.404905
791	17.3974	0.498291	17.3974	0.404905	17.3974	0.404905	17.3974	0.404905	17.3974	0.404905	17.3974	0.438719	17.3974	0.404905
792	17.4194	0.498291	17.4194	0.404905	17.4194	0.404905	17.4194	0.404905	17.4194	0.404905	17.4194	0.438719	17.4194	0.404905
793	17.4414	0.498291	17.4414	0.404905	17.4414	0.404905	17.4414	0.404905	17.4414	0.404905	17.4414	0.438719	17.4414	0.404905
794	17.4635	0.498291	17.4635	0.404905	17.4635	0.404905	17.4635	0.404905	17.4635	0.404905	17.4635	0.438719	17.4635	0.404905
795	17.4855	0.498291	17.4855	0.404905	17.4855	0.404905	17.4855	0.404905	17.4855	0.404905	17.4855	0.438719	17.4855	0.404905
796	17.5075	0.498291	17.5075	0.404905	17.5075	0.404905	17.5075	0.404905	17.5075	0.404905	17.5075	0.438719	17.5075	0.404905
797	17.5295	0.498291	17.5295	0.404905	17.5295	0.404905	17.5295	0.404905	17.5295	0.404905	17.5295	0.438719	17.5295	0.404905
798	17.5516	0.498291	17.5516	0.404905	17.5516	0.404905	17.5516	0.404905	17.5516	0.404905	17.5516	0.438719	17.5516	0.404905
799	17.5736	0.498291	17.5736	0.404905	17.5736	0.404905	17.5736	0.404905	17.5736	0.404905	17.5736	0.438719	17.5736	0.404905
800	17.5956	0.498291	17.5956	0.404905	17.5956	0.404905	17.5956	0.404905	17.5956	0.404905	17.5956	0.438719	17.5956	0.404905
801	17.6176	0.498291	17.6176	0.404905	17.6176	0.404905	17.6176	0.404905	17.6176	0.404905	17.6176	0.438719	17.6176	0.404905
802	17.6396	0.498291	17.6396	0.404905	17.6396	0.404905	17.6396	0.404905	17.6396	0.404905	17.6396	0.438719	17.6396	0.404905
803	17.6617	0.498291	17.6617	0.404905	17.6617	0.404905	17.6617	0.404905	17.6617	0.404905	17.6617	0.438719	17.6617	0.404905
804	17.6837	0.498291	17.6837	0.404905	17.6837	0.404905	17.6837	0.404905	17.6837	0.404905	17.6837	0.438719	17.6837	0.404905
805	17.7057	0.498291	17.7057	0.404905	17.7057	0.404905	17.7057	0.404905	17.7057	0.404905	17.7057	0.438719	17.7057	0.404905
806	17.7277	0.498291	17.7277	0.404905	17.7277	0.404905	17.7277	0.404905	17.7277	0.404905	17.7277	0.438719	17.7277	0.404905
807	17.7497	0.498291	17.7497	0.404905	17.7497	0.404905	17.7497	0.404905	17.7497	0.404905	17.7497	0.438719	17.7497	0.404905
808	17.7718	0.498291	17.7718	0.404905	17.7718	0.404905	17.7718	0.404905	17.7718	0.404905	17.7718	0.438719	17.7718	0.404905
809	17.7938	0.498291	17.7938	0.404905	17.7938	0.404905	17.7938	0.404905	17.7938	0.404905	17.7938	0.438719	17.7938	0.404905
810	17.8158	0.498291	17.8158	0.404905	17.8158	0.404905	17.8158	0.404905	17.8158	0.404905	17.8158	0.438719	17.8158	0.404905
811	17.8378	0.498291	17.8378	0.404905	17.8378	0.404905	17.8378	0.404905	17.8378	0.404905	17.8378	0.438719	17.8378	0.404905
812	17.8599	0.498291	17.8599	0.404905	17.8599	0.404905	17.8599	0.404905	17.8599	0.404905	17.8599	0.438719	17.8599	0.404905
813	17.8819	0.498291	17.8819	0.404905	17.8819	0.404905	17.8819	0.404905	17.8819	0.404905	17.8819	0.438719	17.8819	0.404905
814	17.9039	0.498291	17.9039	0.404905	17.9039	0.404905	17.9039	0.404905	17.9039	0.404905	17.9039	0.438719	17.9039	0.404905
815	17.9259	0.498291	17.9259	0.404905	17.9259	0.404905	17.9259	0.404905	17.9259	0.404905	17.9259	0.438719	17.9259	0.404905
816	17.9479	0.498291	17.9479	0.404905	17.9479	0.404905	17.9479	0.404905	17.9479	0.404905	17.9479	0.438719	17.9479	0.404905
817	17.97	0.498291	17.97	0.404905	17.97	0.404905	17.97	0.404905	17.97	0.404905	17.97	0.438719	17.97	0.404905
818	17.992	0.498291	17.992	0.404905	17.992	0.404905	17.992	0.404905	17.992	0.404905	17.992	0.438719	17.992	0.404905
819	18.014	0.498291	18.014	0.404905	18.014	0.404905	18.014	0.404905	18.014	0.404905	18.014	0.438719	18.014	0.404905
820	18.036	0.498291	18.036	0.404905	18.036	0.404905	18.036	0.404905	18.036	0.404905	18.036	0.438719	18.036	0.404905
821	18.0581	0.498291	18.0581	0.404905	18.0581	0.404905	18.0581	0.404905	18.0581	0.404905	18.0581	0.438719	18.0581	0.404905
822	18.0801	0.498291	18.0801	0.404905	18.0801	0.404905	18.0801	0.404905	18.0801	0.404905	18.0801	0.438719	18.0801	0.404905
823	18.1021	0.498291	18.1021	0.404905	18.1021	0.404905	18.1021	0.404905	18.1021	0.404905	18.1021	0.438719	18.1021	0.404905
824	18.1241	0.498291	18.1241	0.404905	18.1241	0.404905	18.1241	0.404905	18.1241	0.404905	18.1241	0.438719	18.1241	0.404905
825	18.1461	0.498291	18.1461	0.404905	18.1461	0.404905	18.1461	0.404905	18.1461	0.404905	18.1461	0.438719	18.1461	0.404905
826	18.1682	0.498291	18.1682	0.404905	18.1682	0.404905	18.1682	0.404905	18.1682	0.404905	18.1682	0.438719	18.1682	0.404905
827	18.1902	0.498291	18.1902	0.404905	18.1902	0.404905	18.1902	0.404905	18.1902	0.404905	18.1902	0.438719	18.1902	0.404905
828	18.2122	0.498291	18.2122	0.404905	18.2122	0.404905	18.2122	0.404905	18.2122	0.404905	18.2122	0.438719	18.2122	0.404905
829	18.2342	0.498291	18.2342	0.404905	18.2342	0.404905	18.2342	0.404905	18.2342	0.404905	18.2342	0.438719	18.2342	0.404905
830	18.2563	0.498291	18.2563	0.404905	18.2563	0.404905	18.2563	0.404905	18.2563	0.404905	18.2563	0.438719	18.2563	0.404905
831	18.2783	0.498291	18.2783	0.404905	18.2783	0.404905	18.2783	0.404905	18.2783	0.404905	18.2783	0.438719	18.2783	0.404905
832	18.3003	0.498291	18.3003	0.404905	18.3003	0.404905	18.3003	0.404905	18.3003	0.404905	18.3003	0.438719	18.3003	0.404905
833	18.3223	0.498291	18.3223	0.404905	18.3223	0.404905	18.3223	0.404905	18.3223	0.404905	18.3223	0.438719	18.3223	0.404905
834	18.3443	0.498291	18.3443	0.404905	18.3443	0.404905	18.3443	0.404905	18.3443	0.404905	18.3443	0.438719	18.3443	0.404905
835	18.3664	0.498291	18.3664	0.404905	18.3664	0.404905	18.3664	0.404905	18.3664	0.404905	18.3664	0.438719	18.3664	0.404905
836	18.3884	0.498291	18.3884	0.404905	18.3884	0.404905	18.3884	0.404905	18.3884	0.404905	18.3884	0.438719	18.3884	0.404905
837	18.4104	0.498291	18.4104	0.404905	18.4104	0.404905	18.4104	0.404905	18.4104	0.404905	18.4104	0.438719	18.4104	0.404905
838	18.4324	0.498291	18.4324	0.404905	18.4324	0.404905	18.4324	0.404905	18.4324	0.404905	18.4324	0.438719	18.4324	0.404905
839	18.4545	0.498291	18.4545	0.404905	18.4545	0.404905	18.4545	0.404905	18.4545	0.404905	18.4545	0.438719	18.4545	0.404905
840	18.4765	0.498291	18.4765	0.404905	18.4765	0.404905	18.4765	0.404905	18.4765	0.404905	18.4765	0.438719	18.4765	0.404905
841	18.4985	0.498291	18.4985	0.404905	18.4985	0.404905	18.4985	0.404905	18.4985	0.404905	18.4985	0.438719	18.4985	0.404905
842	18.5205	0.498291	18.5205	0.404905	18.5205	0.404905	18.5205	0.404905	18.5205	0.404905	18.5205	0.438719	18.5205	0.404905
843	18.5425	0.498291	18.5425	0.404905	18.5425	0.404905	18.5425	0.404905	18.5425	0.404905	18.5425	0.438719	18.5425	0.404905
844	18.5646	0.498291	18.5646	0.404905	18.5646	0.404905	18.5646	0.404905	18.5646	0.404905	18.5646	0.438719	18.5646	0.404905
845	18.5866	0.498291	18.5866	0.404905	18.5866	0.404905	18.5866	0.404905	18.5866	0.404905	18.5866	0.438719	18.5866	0.404905
846	18.6086	0.498291	18.6086	0.404905	18.6086	0.404905	18.6086	0.404905	18.6086	0.404905	18.6086	0.438719	18.6086	0.404905
847	18.6306	0.498291	18.6306	0.404905	18.6306	0.404905	18.6306	0.404905	18.6306	0.404905	18.6306	0.438719	18.6306	0.404905
848	18.6527	0.498291	18.6527	0.404905	18.6527	0.404905	18.6527	0.404905	18.6527	0.404905	18.6527	0.438719	18.6527	0.404905
849	18.6747	0.498291	18.6747	0.404905	18.6747	0.404905	18.6747	0.404905	18.6747	0.404905	18.6747	0.438719	18.6747	0.404905
850	18.6967	0.498291	18.6967	0.404905	18.6967	0.404905	18.6967	0.404905	18.6967	0.404905	18.6967	0.438719	18.6967	0.404905
851	18.7187	0.498291	18.7187	0.404905	18.7187	0.404905	18.7187	0.404905	18.7187	0.404905	18.7187	0.438719	18.7187	0.404905
852	18.7407	0.498291	18.7407	0.404905	18.7407	0.404905	18.7407	0.404905	18.7407	0.404905	18.7407	0.438719	18.7407	0.404905
853	18.7628	0.498291	18.7628	0.404905	18.7628	0.404905	18.7628	0.404905	18.7628	0.404905	18.7628	0.438719	18.7628	0.404905
854	18.7848	0.498291	18.7848	0.404905	18.7848	0.404905	18.7848	0.404905	18.7848	0.404905	18.7848	0.438719	18.7848	0.404905
855	18.8068	0.498291	18.8068	0.404905	18.8068	0.404905	18.8068	0.404905	18.8068	0.404905	18.8068	0.438719	18.8068	0.404905
856	18.8288	0.498291	18.8288	0.404905	18.8288	0.404905	18.8288	0.404905	18.8288	0.404905	18.8288	0.438719	18.8288	0.404905
857	18.8509	0.498291	18.8509	0.404905	18.8509	0.404905	18.8509	0.404905	18.8509	0.404905	18.8509	0.438719	18.8509	0.404905
858	18.8729	0.498291	18.8729	0.404905	18.8729	0.404905	18.8729	0.404905	18.8729	0.404905	18.8729	0.438719	18.8729	0.404905
859	18.8949	0.498291	18.8949	0.404905	18.8949	0.404905	18.8949	0.404905	18.8949	0.404905	18.8949	0.438719	18.8949	0.404905
860	18.9169	0.498291	18.9169	0.404905	18.9169	0.404905	18.9169	0.404905	18.9169	0.404905	18.9169	0.438719	18.9169	0.404905
861	18.9389	0.498291	18.9389	0.404905	18.9389	0.404905	18.9389	0.404905	18.9389	0.404905	18.9389	0.438719	18.9389	0.404905
862	18.961	0.498291	18.961	0.404905	18.961	0.404905	18.961	0.404905	18.961	0.404905	18.961	0.438719	18.961	0.404905
863	18.983	0.498291	18.983	0.404905	18.983	0.404905	18.983	0.404905	18.983	0.404905	18.983	0.438719	18.983	0.404905
864	19.005	0.498291	19.005	0.404905	19.005	0.404905	19.005	0.404905	19.005	0.404905	19.005	0.438719	19.005	0.404905
865	19.027	0.498291	19.027	0.404905	19.027	0.404905	19.027	0.404905	19.027	0.404905	19.027	0.438719	19.027	0.404905
866	19.049	0.498291	19.049	0.404905	19.049	0.404905	19.049	0.404905	19.049	0.404905	19.049	0.438719	19.049	0.404905
867	19.0711	0.498291	19.0711	0.404905	19.0711	0.404905	19.0711	0.404905	19.0711	0.404905	19.0711	0.438719	19.0711	0.404905
868	19.0931	0.498291	19.0931	0.404905	19.0931	0.404905	19.0931	0.404905	19.0931	0.404905	19.0931	0.438719	19.0931	0.404905
869	19.1151	0.498291	19.1151	0.404905	19.1151	0.404905	19.1151	0.404905	19.1151	0.404905	19.1151	0.438719	19.1151	0.404905
870	19.1371	0.498291	19.1371	0.404905	19.1371	0.404905	19.1371	0.404905	19.1371	0.404905	19.1371	0.438719	19.1371	0.404905
871	19.1592	0.498291	19.1592	0.404905	19.1592	0.404905	19.1592	0.404905	19.1592	0.404905	19.1592	0.438719	19.1592	0.404905
872	19.1812	0.498291	19.1812	0.404905	19.1812	0.404905	19.1812	0.404905	19.1812	0.404905	19.1812	0.438719	19.1812	0.404905
873	19.2032	0.498291	19.2032	0.404905	19.2032	0.404905	19.2032	0.404905	19.2032	0.404905	19.2032	0.438719	19.2032	0.404905
874	19.2252	0.498291	19.2252	0.404905	19.2252	0.404905	19.2252	0.404905	19.2252	0.404905	19.2252	0.438719	19.2252	0.404905
875	19.2472	0.498291	19.2472	0.404905	19.2472	0.404905	19.2472	0.404905	19.2472	0.404905	19.2472	0.438719	19.2472	0.404905
876	19.2693	0.498291	19.2693	0.404905	19.2693	0.404905	19.2693	0.404905	19.2693	0.404905	19.2693	0.438719	19.2693	0.404905
877	19.2913	0.498291	19.2913	0.404905	19.2913	0.404905	19.2913	0.404905	19.2913	0.404905	19.2913	0.438719	19.2913	0.404905
878	19.3133	0.498291	19.3133	0.404905	19.3133	0.404905	19.3133	0.404905	19.3133	0.404905	19.3133	0.438719	19.3133	0.404905
879	19.3353	0.498291	19.3353	0.404905	19.3353	0.404905	19.3353	0.404905	19.3353	0.404905	19.3353	0.438719	19.3353	0.404905
880	19.3574	0.498291	19.3574	0.404905	19.3574	0.404905	19.3574	0.404905	19.3574	0.404905	19.3574	0.438719	19.3574	0.404905
881	19.3794	0.498291	19.3794	0.404905	19.3794	0.404905	19.3794	0.404905	19.3794	0.404905	19.3794	0.438719	19.3794	0.404905
882	19.4014	0.498291	19.4014	0.404905	19.4014	0.404905	19.4014	0.404905	19.4014	0.404905	19.4014	0.438719	19.4014	0.404905
883	19.4234	0.498291	19.4234	0.404905	19.4234	0.404905	19.4234	0.404905	19.4234	0.404905	19.4234	0.438719	19.4234	0.404905
884	19.4454	0.498291	19.4454	0.404905	19.4454	0.404905	19.4454	0.404905	19.4454	0.404905	19.4454	0.438719	19.4454	0.404905
885	19.4675	0.498291	19.4675	0.404905	19.4675	0.404905	19.4675	0.404905	19.4675	0.404905	19.4675	0.438719	19.4675	0.404905
886	19.4895	0.498291	19.4895	0.404905	19.4895	0.404905	19.4895	0.404905	19.4895	0.404905	19.4895	0.438719	19.4895	0.404905
887	19.5115	0.498291	19.5115	0.404905	19.5115	0.404905	19.5115	0.404905	19.5115	0.404905	19.5115	0.438719	19.5115	0.404905
888	19.5335	0.498291	19.5335	0.404905	19.5335	0.404905	19.5335	0.404905	19.5335	0.404905	19.5335	0.438719	19.5335	0.404905
889	19.5556	0.498291	19.5556	0.404905	19.5556	0.404905	19.5556	0.404905	19.5556	0.404905	19.5556	0.438719	19.5556	0.404905
890	19.5776	0.498291	19.5776	0.404905	19.5776	0.404905	19.5776	0.404905	19.5776	0.404905	19.5776	0.438719	19.5776	0.404905
891	19.5996	0.498291	19.5996	0.404905	19.5996	0.404905	19.5996	0.404905	19.5996	0.404905	19.5996	0.438719	19.5996	0.404905
892	19.6216	0.498291	19.6216	0.404905	19.6216	0.404905	19.6216	0.404905	19.6216	0.404905	19.6216	0.438719	19.6216	0.404905
893	19.6436	0.498291	19.6436	0.404905	19.6436	0.404905	19.6436	0.404905	19.6436	0.404905	19.6436	0.438719	19.6436	0.404905
894	19.6657	0.498291	19.6657	0.404905	19.6657	0.404905	19.6657	0.404905	19.6657	0.404905	19.6657	0.438719	19.6657	0.404905
895	19.6877	0.498291	19.6877	0.404905	19.6877	0.404905	19.6877	0.404905	19.6877	0.404905	19.6877	0.438719	19.6877	0.404905
896	19.7097	0.498291	19.7097	0.404905	19.7097	0.404905	19.7097	0.404905	19.7097	0.404905	19.7097	0.438719	19.7097	0.404905
897	19.7317	0.498291	19.7317	0.404905	19.7317	0.404905	19.7317	0.404905	19.7317	0.404905	19.7317	0.438719	19.7317	0.404905
898	19.7538	0.498291	19.7538	0.404905	19.7538	0.404905	19.7538	0.404905	19.7538	0.404905	19.7538	0.438719	19.7538	0.404905
899	19.7758	0.498291	19.7758	0.404905	19.7758	0.404905	19.7758	0.404905	19.7758	0.404905	19.7758	0.438719	19.7758	0.404905
900	19.7978	0.498291	19.7978	0.404905	19.7978	0.404905	19.7978	0.404905	19.7978	0.404905	19.7978	0.438719	19.7978	0.404905
901	19.8198	0.498291	19.8198	0.404905	19.8198	0.404905	19.8198	0.404905	19.8198	0.404905	19.8198	0.438719	19.8198	0.404905
902	19.8418	0.498291	19.8418	0.404905	19.8418	0.404905	19.8418	0.404905	19.8418	0.404905	19.8418	0.438719	19.8418	0.404905
903	19.8639	0.498291	19.8639	0.404905	19.8639	0.404905	19.8639	0.404905	19.8639	0.404905	19.8639	0.438719	19.8639	0.404905
904	19.8859	0.498291	19.8859	0.404905	19.8859	0.404905	19.8859	0.404905	19.8859	0.404905	19.8859	0.438719	19.8859	0.404905
905	19.9079	0.498291	19.9079	0.404905	19.9079	0.404905	19.9079	0.404905	19.9079	0.404905	19.9079	0.438719	19.9079	0.404905
906	19.9299	0.498291	19.9299	0.404905	19.9299	0.404905	19.9299	0.404905	19.9299	0.404905	19.9299	0.438719	19.9299	0.404905
907	19.952	0.498291	19.952	0.404905	19.952	0.404905	19.952	0.404905	19.952	0.404905	19.952	0.438719	19.952	0.404905
908	19.974	0.498291	19.974	0.404905	19.974	0.404905	19.974	0.404905	19.974	0.404905	19.974	0.438719	19.974	0.404905
909	19.996	0.498291	19.996	0.404905	19.996	0.404905	19.996	0.404905	19.996	0.404905	19.996	0.438719	19.996	0.404905
910	20.018	0.498291	20.018	0.404905	20.018	0.404905	20.018	0.404905	20.018	0.404905	20.018	0.438719	20.018	0.404905
911	20.04	0.498291	20.04	0.404905	20.04	0.404905	20.04	0.404905	20.04	0.404905	20.04	0.438719	20.04	0.404905
912	20.0621	0.498291	20.0621	0.404905	20.0621	0.404905	20.0621	0.404905	20.0621	0.404905	20.0621	0.438719	20.0621	0.404905
913	20.0841	0.498291	20.0841	0.404905	20.0841	0.404905	20.0841	0.404905	20.0841	0.404905	20.0841	0.438719	20.0841	0.404905
914	20.1061	0.498291	20.1061	0.404905	20.1061	0.404905	20.1061	0.404905	20.1061	0.404905	20.1061	0.438719	20.1061	0.404905
915	20.1281	0.498291	20.1281	0.404905	20.1281	0.404905	20.1281	0.404905	20.1281	0.404905	20.1281	0.438719	20.1281	0.404905
916	20.1502	0.498291	20.1502	0.404905	20.1502	0.404905	20.1502	0.404905	20.1502	0.404905	20.1502	0.438719	20.1502	0.404905
917	20.1722	0.498291	20.1722	0.404905	20.1722	0.404905	20.1722	0.404905	20.1722	0.404905	20.1722	0.438719	20.1722	0.404905
918	20.1942	0.498291	20.1942	0.404905	20.1942	0.404905	20.1942	0.404905	20.1942	0.404905	20.1942	0.438719	20.1942	0.404905
919	20.2162	0.498291	20.2162	0.404905	20.2162	0.404905	20.2162	0.404905	20.2162	0.404905	20.2162	0.438719	20.2162	0.404905
920	20.2382	0.498291	20.2382	0.404905	20.2382	0.404905	20.2382	0.404905	20.2382	0.404905	20.2382	0.438719	20.2382	0.404905
921	20.2603	0.498291	20.2603	0.404905	20.2603	0.404905	20.2603	0.404905	20.2603	0.404905	20.2603	0.438719	20.2603	0.404905
922	20.2823	0.498291	20.2823	0.404905	20.2823	0.404905	20.2823	0.404905	20.2823	0.404905	20.2823	0.438719	20.2823	0.404905
923	20.3043	0.498291	20.3043	0.404905	20.3043	0.404905	20.3043	0.404905	20.3043	0.404905	20.3043	0.438719	20.3043	0.404905
924	20.3263	0.498291	20.3263	0.404905	20.3263	0.404905	20.3263	0.404905	20.3263	0.404905	20.3263	0.438719	20.3263	0.404905
925	20.3483	0.498291	20.3483	0.404905	20.3483	0.404905	20.3483	0.404905	20.3483	0.404905	20.3483	0.438719	20.3483	0.404905
926	20.3704	0.498291	20.3704	0.404905	20.3704	0.404905	20.3704	0.404905	20.3704	0.404905	20.3704	0.438719	20.3704	0.404905
927	20.3924	0.498291	20.3924	0.404905	20.3924	0.404905	20.3924	0.404905	20.3924	0.404905	20.3924	0.438719	20.3924	0.404905
928	20.4144	0.498291	20.4144	0.404905	20.4144	0.404905	20.4144	0.404905	20.4144	0.404905	20.4144	0.438719	20.4144	0.404905
929	20.4364	0.498291	20.4364	0.404905	20.4364	0.404905	20.4364	0.404905	20.4364	0.404905	20.4364	0.438719	20.4364	0.404905
930	20.4585	0.498291	20.4585	0.404905	20.4585	0.404905	20.4585	0.404905	20.4585	0.404905	20.4585	0.438719	20.4585	0.404905
931	20.4805	0.498291	20.4805	0.404905	20.4805	0.404905	20.4805	0.404905	20.4805	0.404905	20.4805	0.438719	20.4805	0.404905
932	20.5025	0.498291	20.5025	0.404905	20.5025	0.404905	20.5025	0.404905	20.5025	0.404905	20.5025	0.438719	20.5025	0.404905
933	20.5245	0.498291	20.5245	0.404905	20.5245	0.404905	20.5245	0.404905	20.5245	0.404905	20.5245	0.438719	20.5245	0.404905
934	20.5465	0.498291	20.5465	0.404905	20.5465	0.404905	20.5465	0.404905	20.5465	0.404905	20.5465	0.438719	20.5465	0.404905
935	20.5686	0.498291	20.5686	0.404905	20.5686	0.404905	20.5686	0.404905	20.5686	0.404905	20.5686	0.438719	20.5686	0.404905
936	20.5906	0.498291	20.5906	0.404905	20.5906	0.404905	20.5906	0.404905	20.5906	0.404905	20.5906	0.438719	20.5906	0.404905
937	20.6126	0.498291	20.6126	0.404905	20.6126	0.404905	20.6126	0.404905	20.6126	0.404905	20.6126	0.438719	20.6126	0.404905
938	20.6346	0.498291	20.6346	0.404905	20.6346	0.404905	20.6346	0.404905	20.6346	0.404905	20.6346	0.438719	20.6346	0.404905
939	20.6567	0.498291	20.6567	0.404905	20.6567	0.404905	20.6567	0.404905	20.6567	0.404905	20.6567	0.438719	20.6567	0.404905
940	20.6787	0.498291	20.6787	0.404905	20.6787	0.404905	20.6787	0.404905	20.6787	0.404905	20.6787	0.438719	20.6787	0.404905
941	20.7007	0.498291	20.7007	0.404905	20.7007	0.404905	20.7007	0.404905	20.7007	0.404905	20.7007	0.438719	20.7007	0.404905
942	20.7227	0.498291	20.7227	0.404905	20.7227	0.404905	20.7227	0.404905	20.7227	0.404905	20.7227	0.438719	20.7227	0.404905
943	20.7447	0.498291	20.7447	0.404905	20.7447	0.404905	20.7447	0.404905	20.7447	0.404905	20.7447	0.438719	20.7447	0.404905
944	20.7668	0.498291	20.7668	0.404905	20.7668	0.404905	20.7668	0.404905	20.7668	0.404905	20.7668	0.438719	20.7668	0.404905
945	20.7888	0.498291	20.7888	0.404905	20.7888	0.404905	20.7888	0.404905	20.7888	0.404905	20.7888	0.438719	20.7888	0.404905
946	20.8108	0.498291	20.8108	0.404905	20.8108	0.404905	20.8108	0.404905	20.8108	0.404905	20.8108	0.438719	20.8108	0.404905
947	20.8328	0.498291	20.8328	0.404905	20.8328	0.404905	20.8328	0.404905	20.8328	0.404905	20.8328	0.438719	20.8328	0.404905
948	20.8549	0.498291	20.8549	0.404905	20.8549	0.404905	20.8549	0.404905	20.8549	0.404905	20.8549	0.438719	20.8549	0.404905
949	20.8769	0.498291	20.8769	0.404905	20.8769	0.404905	20.8769	0.404905	20.8769	0.404905	20.8769	0.438719	20.8769	0.404905
950	20.8989	0.498291	20.8989	0.404905	20.8989	0.404905	20.8989	0.404905	20.8989	0.404905	20.8989	0.438719	20.8989	0.404905
951	20.9209	0.498291	20.9209	0.404905	20.9209	0.404905	20.9209	0.404905	20.9209	0.404905	20.9209	0.438719	20.9209	0.404905
952	20.9429	0.498291	20.9429	0.404905	20.9429	0.404905	20.9429	0.404905	20.9429	0.404905	20.9429	0.438719	20.9429	0.404905
953	20.965	0.498291	20.965	0.404905	20.965	0.404905	20.965	0.404905	20.965	0.404905	20.965	0.438719	20.965	0.404905
954	20.987	0.498291	20.987	0.404905	20.987	0.404905	20.987	0.404905	20.987	0.404905	20.987	0.438719	20.987	0.404905
955	21.009	0.498291	21.009	0.404905	21.009	0.404905	21.009	0.404905	21.009	0.404905	21.009	0.438719	21.009	0.404905
956	21.031	0.498291	21.031	0.404905	21.031	0.404905	21.031	0.404905	21.031	0.404905	21.031	0.438719	21.031	0.404905
957	21.0531	0.498291	21.0531	0.404905	21.0531	0.404905	21.0531	0.404905	21.0531	0.404905	21.0531	0.438719	21.0531	0.404905
958	21.0751	0.498291	21.0751	0.404905	21.0751	0.404905	21.0751	0.404905	21.0751	0.404905	21.0751	0.438719	21.0751	0.404905
959	21.0971	0.498291	21.0971	0.404905	21.0971	0.404905	21.0971	0.404905	21.0971	0.404905	21.0971	0.438719	21.0971	0.404905
960	21.1191	0.498291	21.1191	0.404905	21.1191	0.404905	21.1191	0.404905	21.1191	0.404905	21.1191	0.438719	21.1191	0.404905
961	21.1411	0.498291	21.1411	0.404905	21.1411	0.404905	21.1411	0.404905	21.1411	0.404905	21.1411	0.438719	21.1411	0.404905
962	21.1632	0.498291	21.1632	0.404905	21.1632	0.404905	21.1632	0.404905	21.1632	0.404905	21.1632	0.438719	21.1632	0.404905
963	21.1852	0.498291	21.1852	0.404905	21.1852	0.404905	21.1852	0.404905	21.1852	0.404905	21.1852	0.438719	21.1852	0.404905
964	21.2072	0.498291	21.2072	0.404905	21.2072	0.404905	21.2072	0.404905	21.2072	0.404905	21.2072	0.438719	21.2072	0.404905
965	21.2292	0.498291	21.2292	0.404905	21.2292	0.404905	21.2292	0.404905	21.2292	0.404905	21.2292	0.438719	21.2292	0.404905
966	21.2513	0.498291	21.2513	0.404905	21.2513	0.404905	21.2513	0.404905	21.2513	0.404905	21.2513	0.438719	21.2513	0.404905
967	21.2733	0.498291	21.2733	0.404905	21.2733	0.404905	21.2733	0.404905	21.2733	0.404905	21.2733	0.438719	21.2733	0.404905
968	21.2953	0.498291	21.2953	0.404905	21.2953	0.404905	21.2953	0.404905	21.2953	0.404905	21.2953	0.438719	21.2953	0.404905
969	21.3173	0.498291	21.3173	0.404905	21.3173	0.404905	21.3173	0.404905	21.3173	0.404905	21.3173	0.438719	21.3173	0.404905
970	21.3393	0.498291	21.3393	0.404905	21.3393	0.404905	21.3393	0.404905	21.3393	0.404905	21.3393	0.438719	21.3393	0.404905
971	21.3614	0.498291	21.3614	0.404905	21.3614	0.404905	21.3614	0.404905	21.3614	0.404905	21.3614	0.438719	21.3614	0.404905
972	21.3834	0.498291	21.3834	0.404905	21.3834	0.404905	21.3834	0.404905	21.3834	0.404905	21.3834	0.438719	21.3834	0.404905
973	21.4054	0.498291	21.4054	0.404905	21.4054	0.404905	21.4054	0.404905	21.4054	0.404905	21.4054	0.438719	21.4054	0.404905
974	21.4274	0.498291	21.4274	0.404905	21.4274	0.404905	21.4274	0.404905	21.4274	0.404905	21.4274	0.438719	21.4274	0.404905
975	21.4494	0.498291	21.4494	0.404905	21.4494	0.404905	21.4494	0.404905	21.4494	0.404905	21.4494	0.438719	21.4494	0.404905
976	21.4715	0.498291	21.4715	0.404905	21.4715	0.404905	21.4715	0.404905	21.4715	0.404905	21.4715	0.438719	21.4715	0.404905
977	21.4935	0.498291	21.4935	0.404905	21.4935	0.404905	21.4935	0.404905	21.4935	0.404905	21.4935	0.438719	21.4935	0.404905
978	21.5155	0.498291	21.5155	0.404905	21.5155	0.404905	21.5155	0.404905	21.5155	0.404905	21.5155	0.438719	21.5155	0.404905
979	21.5375	0.498291	21.5375	0.404905	21.5375	0.404905	21.5375	0.404905	21.5375	0.404905	21.5375	0.438719	21.5375	0.404905
980	21.5596	0.498291	21.5596	0.404905	21.5596	0.404905	21.5596	0.404905	21.5596	0.404905	21.5596	0.438719	21.5596	0.404905
981	21.5816	0.498291	21.5816	0.404905	21.5816	0.404905	21.5816	0.404905	21.5816	0.404905	21.5816	0.438719	21.5816	0.404905
982	21.6036	0.498291	21.6036	0.404905	21.6036	0.404905	21.6036	0.404905	21.6036	0.404905	21.6036	0.438719	21.6036	0.404905
983	21.6256	0.498291	21.6256	0.404905	21.6256	0.404905	21.6256	0.404905	21.6256	0.404905	21.6256	0.438719	21.6256	0.404905
984	21.6476	0.498291	21.6476	0.404905	21.6476	0.404905	21.6476	0.404905	21.6476	0.404905	21.6476	0.438719	21.6476	0.404905
985	21.6697	0.498291	21.6697	0.404905	21.6697	0.404905	21.6697	0.404905	21.6697	0.404905	21.6697	0.438719	21.6697	0.404905
986	21.6917	0.498291	21.6917	0.404905	21.6917	0.404905	21.6917	0.404905	21.6917	0.404905	21.6917	0.438719	21.6917	0.404905
987	21.7137	0.498291	21.7137	0.404905	21.7137	0.404905	21.7137	0.404905	21.7137	0.404905	21.7137	0.438719	21.7137	0.404905
988	21.7357	0.498291	21.7357	0.404905	21.7357	0.404905	21.7357	0.404905	21.7357	0.404905	21.7357	0.438719	21.7357	0.404905
989	21.7578	0.498291	21.7578	0.404905	21.7578	0.404905	21.7578	0.404905	21.7578	0.404905	21.7578	0.438719	21.7578	0.404905
990	21.7798	0.498291	21.7798	0.404905	21.7798	0.404905	21.7798	0.404905	21.7798	0.404905	21.7798	0.438719	21.7798	0.404905
991	21.8018	0.498291	21.8018	0.404905	21.8018	0.404905	21.8018	0.404905	21.8018	0.404905	21.8018	0.438719	21.8018	0.404905
992	21.8238	0.498291	21.8238	0.404905	21.8238	0.404905	21.8238	0.404905	21.8238	0.404905	21.8238	0.438719	21.8238	0.404905
993	21.8458	0.498291	21.8458	0.404905	21.8458	0.404905	21.8458	0.404905	21.8458	0.404905	21.8458	0.438719	21.8458	0.404905
994	21.8679	0.498291	21.8679	0.404905	21.8679	0.404905	21.8679	0.404905	21.8679	0.404905	21.8679	0.438719	21.8679	0.404905
995	21.8899	0.498291	21.8899	0.404905	21.8899	0.404905	21.8899	0.404905	21.8899	0.404905	21.8899	0.438719	21.8899	0.404905
996	21.9119	0.498291	21.9119	0.404905	21.9119	0.404905	21.9119	0.404905	21.9119	0.404905	21.9119	0.438719	21.9119	0.404905
997	21.9339	0.498291	21.9339	0.404905	21.9339	0.404905	21.9339	0.404905	21.9339	0.404905	21.9339	0.438719	21.9339	0.404905
998	21.956	0.498291	21.956	0.404905	21.956	0.404905	21.956	0.404905	21.956	0.404905	21.956	0.438719	21.956	0.404905
999	21.978	0.498291	21.978	0.404905	21.978	0.404905	21.978	0.404905	21.978	0.404905	21.978	0.438719	21.978	0.404905
1000	22	0.498291	22	0.404905	22	0.404905	22	0.404905	22	0.404905	22	0.438719	22	0.404905

## Sheet: def_bolivia
Bolivia	actual period		2040_ssp370		2040_ssp585		2070_ssp370		2070_ssp585		2100_ssp370		2100_ssp585
	x	y	x	y	x	y	x	y	x	y	x	y	x	y
1	0	0.857136	0	0.784825	0	0.881111	0	0.816818	0	0.863311	0	0.686801	0	0.704669
2	0.022022	0.857136	0.022022	0.784825	0.022022	0.881111	0.022022	0.816818	0.022022	0.863311	0.022022	0.686801	0.022022	0.66407
3	0.044044	0.857136	0.044044	0.760542	0.044044	0.881111	0.044044	0.816818	0.044044	0.837475	0.132132	0.670929	0.044044	0.66407
4	0.0660661	0.857136	0.0660661	0.760542	0.0660661	0.881111	0.0660661	0.816818	0.0660661	0.837475	0.154154	0.670929	0.0660661	0.66407
5	0.0880881	0.81683	0.0880881	0.760542	0.0880881	0.842895	0.0880881	0.775008	0.0880881	0.806812	0.176176	0.670929	0.0880881	0.66407
6	0.11011	0.81683	0.11011	0.760542	0.11011	0.842895	0.11011	0.775008	0.11011	0.806812	0.198198	0.670929	0.22022	0.607257
7	0.132132	0.73857	0.132132	0.685137	0.132132	0.767447	0.132132	0.733699	0.22022	0.80277	0.22022	0.670929	0.242242	0.607257
8	0.154154	0.750326	0.154154	0.69629	0.154154	0.778607	0.154154	0.733699	0.242242	0.80277	0.242242	0.670929	0.264264	0.607257
9	0.176176	0.750326	0.176176	0.69629	0.176176	0.778607	0.176176	0.733699	0.264264	0.80277	0.264264	0.670929	0.286286	0.607257
10	0.198198	0.750326	0.198198	0.69629	0.198198	0.778607	0.198198	0.733699	0.286286	0.80277	0.286286	0.670929	0.308308	0.607257
11	0.22022	0.750326	0.22022	0.69629	0.22022	0.778607	0.22022	0.733699	0.308308	0.80277	0.308308	0.670929	0.33033	0.607257
12	0.242242	0.750326	0.242242	0.69629	0.242242	0.778607	0.242242	0.733699	0.33033	0.80277	0.044044	0.659215	0.352352	0.607257
13	0.264264	0.750326	0.264264	0.69629	0.264264	0.778607	0.264264	0.733699	0.352352	0.80277	0.0660661	0.659215	0.374374	0.607257
14	0.286286	0.750326	0.286286	0.69629	0.286286	0.778607	0.286286	0.733699	0.374374	0.80277	0.0880881	0.659215	0.396396	0.607257
15	0.308308	0.750326	0.308308	0.69629	0.308308	0.778607	0.308308	0.733699	0.132132	0.770126	0.11011	0.659215	0.418418	0.607257
16	0.33033	0.750326	0.33033	0.69629	0.33033	0.778607	0.33033	0.733699	0.154154	0.770126	0.352352	0.620889	0.44044	0.607257
17	0.352352	0.750326	0.352352	0.635837	0.352352	0.778607	0.352352	0.733699	0.176176	0.770126	0.374374	0.620889	0.462462	0.607257
18	0.374374	0.691702	0.374374	0.635837	0.374374	0.724332	0.374374	0.733699	0.198198	0.770126	0.396396	0.620889	0.484484	0.607257
19	0.396396	0.691702	0.396396	0.635837	0.396396	0.724332	0.396396	0.675912	0.396396	0.747571	0.418418	0.620889	0.506507	0.607257
20	0.418418	0.691702	0.418418	0.635837	0.418418	0.724332	0.418418	0.675912	0.418418	0.747571	0.44044	0.620889	0.528529	0.607257
21	0.44044	0.691702	0.44044	0.635837	0.44044	0.724332	0.44044	0.675912	0.44044	0.747571	0.462462	0.620889	0.550551	0.607257
22	0.462462	0.691702	0.462462	0.635837	0.462462	0.724332	0.462462	0.675912	0.462462	0.747571	0.484484	0.620889	0.132132	0.595224
23	0.484484	0.691702	0.484484	0.635837	0.484484	0.724332	0.484484	0.675912	0.484484	0.747571	0.506507	0.620889	0.154154	0.595224
24	0.506507	0.691702	0.506507	0.635837	0.506507	0.724332	0.506507	0.675912	0.506507	0.747571	0.528529	0.620889	0.176176	0.595224
25	0.528529	0.691702	0.528529	0.635837	0.528529	0.724332	0.528529	0.675912	0.528529	0.747571	0.550551	0.620889	0.198198	0.595224
26	0.550551	0.691702	0.550551	0.635837	0.550551	0.724332	0.550551	0.675912	0.550551	0.747571	0.572573	0.620889	0.572573	0.595224
27	0.572573	0.691702	0.572573	0.635837	0.572573	0.724332	0.572573	0.675912	0.572573	0.747571	0.594595	0.620889	0.594595	0.595224
28	0.594595	0.679286	0.594595	0.624001	0.594595	0.700655	0.594595	0.675912	0.594595	0.747571	0.616617	0.620889	0.616617	0.595224
29	0.616617	0.679286	0.616617	0.624001	0.616617	0.700655	0.616617	0.650703	0.616617	0.747571	0.638639	0.620889	0.638639	0.595224
30	0.638639	0.679286	0.638639	0.624001	0.638639	0.700655	0.638639	0.650703	0.638639	0.725837	0.660661	0.620889	0.660661	0.595224
31	0.660661	0.679286	0.660661	0.624001	0.660661	0.700655	0.660661	0.650703	0.660661	0.725837	0.682683	0.620889	0.682683	0.595224
32	0.682683	0.679286	0.682683	0.624001	0.682683	0.700655	0.682683	0.56667	0.682683	0.725837	0.704705	0.620889	0.704705	0.595224
33	0.704705	0.679286	0.704705	0.624001	0.704705	0.700655	0.704705	0.56667	0.704705	0.725837	0.33033	0.60861	0.726727	0.595224
34	0.726727	0.679286	0.726727	0.624001	0.726727	0.700655	0.726727	0.56667	0.726727	0.725837	0.726727	0.596193	0.748749	0.595224
35	0.748749	0.679286	0.748749	0.624001	0.748749	0.700655	0.748749	0.56667	0.748749	0.725837	0.748749	0.596193	0.770771	0.595224
36	0.770771	0.679286	0.770771	0.624001	0.770771	0.700655	0.770771	0.56667	0.770771	0.725837	0.770771	0.596193	0.792793	0.595224
37	0.792793	0.679286	0.792793	0.624001	0.792793	0.700655	0.792793	0.56667	0.792793	0.725837	0.792793	0.596193	0.814815	0.595224
38	0.814815	0.679286	0.814815	0.624001	0.814815	0.700655	0.814815	0.56667	0.814815	0.725837	0.814815	0.596193	0.836837	0.595224
39	0.836837	0.679286	0.836837	0.624001	0.836837	0.700655	0.836837	0.56667	0.836837	0.725837	0.836837	0.596193	0.858859	0.595224
40	0.858859	0.679286	0.858859	0.624001	0.858859	0.700655	0.858859	0.56667	0.858859	0.725837	0.858859	0.596193	0.880881	0.595224
41	0.880881	0.679286	0.880881	0.624001	0.880881	0.700655	0.880881	0.56667	0.880881	0.725837	0.880881	0.596193	0.902903	0.595224
42	0.902903	0.679286	0.902903	0.624001	0.902903	0.700655	0.902903	0.56667	0.902903	0.725837	0.902903	0.596193	0.924925	0.595224
43	0.924925	0.679286	0.924925	0.624001	0.924925	0.700655	0.924925	0.56667	0.924925	0.725837	0.924925	0.596193	0.946947	0.595224
44	0.946947	0.679286	0.946947	0.624001	0.946947	0.700655	0.946947	0.56667	0.946947	0.725837	0.946947	0.596193	0.968969	0.595224
45	0.968969	0.679286	0.968969	0.624001	0.968969	0.700655	0.968969	0.56667	0.968969	0.725837	0.968969	0.596193	0.990991	0.595224
46	0.990991	0.679286	0.990991	0.624001	0.990991	0.700655	0.990991	0.56667	0.990991	0.725837	0.990991	0.596193	1.01301	0.595224
47	1.01301	0.679286	1.01301	0.624001	1.01301	0.700655	1.01301	0.56667	1.01301	0.725837	1.01301	0.596193	1.03504	0.595224
48	1.03504	0.679286	1.03504	0.624001	1.03504	0.700655	1.03504	0.56667	1.03504	0.725837	1.03504	0.596193	1.05706	0.595224
49	1.05706	0.679286	1.05706	0.624001	1.05706	0.700655	1.05706	0.56667	1.05706	0.725837	1.05706	0.596193	1.07908	0.595224
50	1.07908	0.679286	1.07908	0.624001	1.07908	0.700655	1.07908	0.56667	1.07908	0.725837	1.07908	0.596193	1.1011	0.595224
51	1.1011	0.679286	1.1011	0.624001	1.1011	0.700655	1.1011	0.56667	1.1011	0.725837	1.1011	0.596193	1.12312	0.595224
52	1.12312	0.679286	1.12312	0.624001	1.12312	0.700655	1.12312	0.56667	1.12312	0.725837	1.12312	0.596193	1.14515	0.595224
53	1.14515	0.679286	1.14515	0.624001	1.14515	0.700655	1.14515	0.56667	1.14515	0.725837	1.14515	0.596193	1.16717	0.595224
54	1.16717	0.691702	1.16717	0.624001	1.16717	0.71256	1.16717	0.56667	1.16717	0.725837	1.16717	0.596193	1.18919	0.595224
55	1.18919	0.691702	1.18919	0.624001	1.18919	0.71256	1.18919	0.56667	1.18919	0.725837	1.18919	0.596193	1.21121	0.595224
56	1.21121	0.691702	1.21121	0.624001	1.21121	0.71256	1.21121	0.56667	1.21121	0.725837	1.21121	0.596193	1.23323	0.595224
57	1.23323	0.691702	1.23323	0.624001	1.23323	0.71256	1.23323	0.56667	1.23323	0.725837	1.23323	0.596193	1.25526	0.595224
58	1.25526	0.691702	1.25526	0.624001	1.25526	0.71256	1.25526	0.56667	1.25526	0.725837	1.25526	0.596193	1.27728	0.595224
59	1.27728	0.691702	1.27728	0.624001	1.27728	0.71256	1.27728	0.56667	1.27728	0.725837	1.27728	0.596193	1.2993	0.595224
60	1.2993	0.691702	1.2993	0.624001	1.2993	0.71256	1.2993	0.56667	1.2993	0.725837	1.2993	0.596193	1.32132	0.595224
61	1.32132	0.691702	1.32132	0.624001	1.32132	0.71256	1.32132	0.56667	1.32132	0.725837	1.32132	0.596193	1.34334	0.595224
62	1.34334	0.691702	1.34334	0.624001	1.34334	0.71256	1.34334	0.56667	1.34334	0.725837	1.34334	0.596193	1.36537	0.595224
63	1.36537	0.691702	1.36537	0.624001	1.36537	0.71256	1.36537	0.56667	1.36537	0.725837	1.36537	0.596193	1.38739	0.595224
64	1.38739	0.691702	1.38739	0.624001	1.38739	0.71256	1.38739	0.56667	1.38739	0.725837	1.38739	0.596193	1.40941	0.595224
65	1.40941	0.691702	1.40941	0.624001	1.40941	0.71256	1.40941	0.56667	1.40941	0.725837	1.40941	0.596193	1.43143	0.595224
66	1.43143	0.691702	1.43143	0.624001	1.43143	0.71256	1.43143	0.56667	1.43143	0.725837	1.43143	0.596193	1.45345	0.595224
67	1.45345	0.691702	1.45345	0.624001	1.45345	0.71256	1.45345	0.56667	1.45345	0.725837	1.45345	0.596193	1.47548	0.595224
68	1.47548	0.691702	1.47548	0.624001	1.47548	0.71256	1.47548	0.56667	1.47548	0.725837	1.47548	0.596193	1.4975	0.595224
69	1.4975	0.691702	1.4975	0.624001	1.4975	0.71256	1.4975	0.56667	1.4975	0.725837	1.4975	0.596193	1.51952	0.595224
70	1.51952	0.691702	1.51952	0.624001	1.51952	0.71256	1.51952	0.56667	1.51952	0.725837	1.51952	0.596193	1.54154	0.595224
71	1.54154	0.691702	1.54154	0.624001	1.54154	0.71256	1.54154	0.56667	1.54154	0.725837	1.54154	0.596193	1.56356	0.595224
72	1.56356	0.691702	1.56356	0.624001	1.56356	0.71256	1.56356	0.56667	1.56356	0.725837	1.56356	0.596193	1.58559	0.595224
73	1.58559	0.691702	1.58559	0.624001	1.58559	0.71256	1.58559	0.56667	1.58559	0.725837	1.58559	0.596193	1.60761	0.595224
74	1.60761	0.691702	1.60761	0.624001	1.60761	0.71256	1.60761	0.56667	1.60761	0.725837	1.60761	0.596193	1.62963	0.595224
75	1.62963	0.654031	1.62963	0.57531	1.62963	0.676441	1.62963	0.538982	1.62963	0.673185	1.62963	0.558093	1.65165	0.595224
76	1.65165	0.654031	1.65165	0.57531	1.65165	0.676441	1.65165	0.538982	1.65165	0.673185	1.65165	0.558093	1.67367	0.595224
77	1.67367	0.654031	1.67367	0.57531	1.67367	0.676441	1.67367	0.538982	1.67367	0.673185	1.67367	0.558093	1.6957	0.595224
78	1.6957	0.654031	1.6957	0.57531	1.6957	0.676441	1.6957	0.538982	1.6957	0.673185	1.6957	0.558093	1.71772	0.595224
79	1.71772	0.654031	1.71772	0.57531	1.71772	0.676441	1.71772	0.538982	1.71772	0.673185	1.71772	0.558093	1.73974	0.595224
80	1.73974	0.654031	1.73974	0.57531	1.73974	0.676441	1.73974	0.538982	1.73974	0.673185	1.73974	0.558093	1.76176	0.595224
81	1.76176	0.654031	1.76176	0.57531	1.76176	0.676441	1.76176	0.538982	1.76176	0.673185	1.76176	0.558093	1.78378	0.595224
82	1.78378	0.654031	1.78378	0.57531	1.78378	0.676441	1.78378	0.538982	1.78378	0.673185	1.78378	0.558093	1.80581	0.595224
83	1.80581	0.654031	1.80581	0.57531	1.80581	0.676441	1.80581	0.538982	1.80581	0.673185	1.80581	0.558093	1.82783	0.595224
84	1.82783	0.654031	1.82783	0.57531	1.82783	0.676441	1.82783	0.538982	1.82783	0.673185	1.82783	0.558093	1.84985	0.595224
85	1.84985	0.654031	1.84985	0.57531	1.84985	0.676441	1.84985	0.538982	1.84985	0.673185	1.84985	0.558093	1.87187	0.595224
86	1.87187	0.654031	1.87187	0.57531	1.87187	0.676441	1.87187	0.538982	1.87187	0.673185	1.87187	0.558093	1.89389	0.595224
87	1.89389	0.654031	1.89389	0.57531	1.89389	0.676441	1.89389	0.538982	1.89389	0.673185	1.89389	0.558093	1.91592	0.595224
88	1.91592	0.654031	1.91592	0.57531	1.91592	0.676441	1.91592	0.538982	1.91592	0.673185	1.91592	0.558093	1.93794	0.595224
89	1.93794	0.654031	1.93794	0.57531	1.93794	0.676441	1.93794	0.538982	1.93794	0.673185	1.93794	0.558093	1.95996	0.595224
90	1.95996	0.654031	1.95996	0.57531	1.95996	0.676441	1.95996	0.538982	1.95996	0.673185	1.95996	0.558093	1.98198	0.595224
91	1.98198	0.654031	1.98198	0.57531	1.98198	0.676441	1.98198	0.538982	1.98198	0.673185	1.98198	0.558093	2.004	0.595224
92	2.004	0.654031	2.004	0.57531	2.004	0.676441	2.004	0.538982	2.004	0.673185	2.004	0.558093	2.02603	0.595224
93	2.02603	0.654031	2.02603	0.57531	2.02603	0.676441	2.02603	0.538982	2.02603	0.673185	2.02603	0.558093	2.04805	0.595224
94	2.04805	0.654031	2.04805	0.57531	2.04805	0.676441	2.04805	0.538982	2.04805	0.673185	2.04805	0.558093	2.07007	0.595224
95	2.07007	0.654031	2.07007	0.57531	2.07007	0.676441	2.07007	0.538982	2.07007	0.673185	2.07007	0.558093	2.09209	0.595224
96	2.09209	0.654031	2.09209	0.57531	2.09209	0.676441	2.09209	0.538982	2.09209	0.673185	2.09209	0.558093	2.11411	0.595224
97	2.11411	0.654031	2.11411	0.57531	2.11411	0.676441	2.11411	0.538982	2.11411	0.673185	2.11411	0.558093	2.13614	0.595224
98	2.13614	0.654031	2.13614	0.57531	2.13614	0.676441	2.13614	0.538982	2.13614	0.673185	2.13614	0.558093	2.15816	0.595224
99	2.15816	0.654031	2.15816	0.57531	2.15816	0.676441	2.15816	0.538982	2.15816	0.673185	2.15816	0.558093	2.18018	0.595224
100	2.18018	0.654031	2.18018	0.57531	2.18018	0.676441	2.18018	0.538982	2.18018	0.673185	2.18018	0.558093	2.2022	0.595224
101	2.2022	0.654031	2.2022	0.57531	2.2022	0.676441	2.2022	0.538982	2.2022	0.673185	2.2022	0.558093	2.22422	0.595224
102	2.22422	0.654031	2.22422	0.57531	2.22422	0.676441	2.22422	0.538982	2.22422	0.673185	2.22422	0.558093	2.24625	0.595224
103	2.24625	0.654031	2.24625	0.57531	2.24625	0.676441	2.24625	0.538982	2.24625	0.673185	2.24625	0.558093	2.26827	0.595224
104	2.26827	0.654031	2.26827	0.57531	2.26827	0.676441	2.26827	0.538982	2.26827	0.673185	2.26827	0.558093	2.29029	0.595224
105	2.29029	0.654031	2.29029	0.57531	2.29029	0.676441	2.29029	0.538982	2.29029	0.673185	2.29029	0.558093	2.31231	0.595224
106	2.31231	0.654031	2.31231	0.57531	2.31231	0.676441	2.31231	0.538982	2.31231	0.673185	2.31231	0.558093	2.33433	0.595224
107	2.33433	0.654031	2.33433	0.57531	2.33433	0.676441	2.33433	0.538982	2.33433	0.673185	2.33433	0.558093	2.35636	0.595224
108	2.35636	0.654031	2.35636	0.57531	2.35636	0.676441	2.35636	0.538982	2.35636	0.673185	2.35636	0.558093	2.37838	0.595224
109	2.37838	0.654031	2.37838	0.57531	2.37838	0.676441	2.37838	0.538982	2.37838	0.673185	2.37838	0.558093	2.4004	0.595224
110	2.4004	0.654031	2.4004	0.57531	2.4004	0.676441	2.4004	0.538982	2.4004	0.673185	2.4004	0.558093	2.42242	0.595224
111	2.42242	0.654031	2.42242	0.57531	2.42242	0.676441	2.42242	0.538982	2.42242	0.673185	2.42242	0.558093	2.44444	0.595224
112	2.44444	0.654031	2.44444	0.57531	2.44444	0.676441	2.44444	0.538982	2.44444	0.673185	2.44444	0.558093	2.46647	0.595224
113	2.46647	0.654031	2.46647	0.57531	2.46647	0.676441	2.46647	0.538982	2.46647	0.673185	2.46647	0.558093	2.48849	0.595224
114	2.48849	0.654031	2.48849	0.57531	2.48849	0.676441	2.48849	0.538982	2.48849	0.673185	2.48849	0.558093	2.51051	0.595224
115	2.51051	0.654031	2.51051	0.57531	2.51051	0.676441	2.51051	0.538982	2.51051	0.673185	2.51051	0.558093	2.53253	0.595224
116	2.53253	0.654031	2.53253	0.57531	2.53253	0.676441	2.53253	0.538982	2.53253	0.673185	2.53253	0.558093	2.55455	0.595224
117	2.55455	0.654031	2.55455	0.57531	2.55455	0.676441	2.55455	0.538982	2.55455	0.673185	2.55455	0.558093	2.57658	0.595224
118	2.57658	0.654031	2.57658	0.57531	2.57658	0.676441	2.57658	0.538982	2.57658	0.673185	2.57658	0.558093	2.5986	0.595224
119	2.5986	0.654031	2.5986	0.57531	2.5986	0.676441	2.5986	0.538982	2.5986	0.673185	2.5986	0.558093	2.62062	0.595224
120	2.62062	0.654031	2.62062	0.57531	2.62062	0.676441	2.62062	0.538982	2.62062	0.673185	2.62062	0.558093	2.64264	0.595224
121	2.64264	0.654031	2.64264	0.57531	2.64264	0.676441	2.64264	0.538982	2.64264	0.673185	2.64264	0.558093	2.66466	0.595224
122	2.66466	0.654031	2.66466	0.57531	2.66466	0.676441	2.66466	0.538982	2.66466	0.673185	2.66466	0.558093	2.68669	0.595224
123	2.68669	0.654031	2.68669	0.57531	2.68669	0.676441	2.68669	0.538982	2.68669	0.673185	2.68669	0.558093	2.70871	0.595224
124	2.70871	0.654031	2.70871	0.57531	2.70871	0.676441	2.70871	0.538982	2.70871	0.673185	2.70871	0.558093	2.73073	0.595224
125	2.73073	0.654031	2.73073	0.57531	2.73073	0.676441	2.73073	0.538982	2.73073	0.673185	2.73073	0.558093	2.75275	0.595224
126	2.75275	0.654031	2.75275	0.57531	2.75275	0.676441	2.75275	0.538982	2.75275	0.673185	2.75275	0.558093	2.77477	0.595224
127	2.77477	0.654031	2.77477	0.57531	2.77477	0.676441	2.77477	0.538982	2.77477	0.673185	2.77477	0.558093	2.7968	0.595224
128	2.7968	0.654031	2.7968	0.57531	2.7968	0.676441	2.7968	0.538982	2.7968	0.673185	2.7968	0.558093	2.81882	0.595224
129	2.81882	0.654031	2.81882	0.57531	2.81882	0.676441	2.81882	0.538982	2.81882	0.673185	2.81882	0.558093	2.84084	0.595224
130	2.84084	0.654031	2.84084	0.57531	2.84084	0.676441	2.84084	0.538982	2.84084	0.673185	2.84084	0.558093	2.86286	0.595224
131	2.86286	0.641189	2.86286	0.57531	2.86286	0.676441	2.86286	0.538982	2.86286	0.673185	2.86286	0.558093	2.88488	0.595224
132	2.88488	0.641189	2.88488	0.57531	2.88488	0.676441	2.88488	0.538982	2.88488	0.673185	2.88488	0.558093	2.90691	0.595224
133	2.90691	0.641189	2.90691	0.57531	2.90691	0.676441	2.90691	0.538982	2.90691	0.673185	2.90691	0.558093	2.92893	0.595224
134	2.92893	0.641189	2.92893	0.57531	2.92893	0.676441	2.92893	0.538982	2.92893	0.673185	2.92893	0.558093	2.95095	0.595224
135	2.95095	0.641189	2.95095	0.57531	2.95095	0.676441	2.95095	0.538982	2.95095	0.673185	2.95095	0.558093	2.97297	0.595224
136	2.97297	0.641189	2.97297	0.57531	2.97297	0.676441	2.97297	0.538982	2.97297	0.673185	2.97297	0.558093	2.99499	0.595224
137	2.99499	0.641189	2.99499	0.57531	2.99499	0.676441	2.99499	0.538982	2.99499	0.673185	2.99499	0.558093	3.01702	0.595224
138	3.01702	0.641189	3.01702	0.57531	3.01702	0.676441	3.01702	0.538982	3.01702	0.673185	3.01702	0.558093	3.03904	0.595224
139	3.03904	0.641189	3.03904	0.57531	3.03904	0.676441	3.03904	0.538982	3.03904	0.673185	3.03904	0.558093	3.06106	0.595224
140	3.06106	0.641189	3.06106	0.57531	3.06106	0.676441	3.06106	0.538982	3.06106	0.673185	3.06106	0.558093	3.08308	0.595224
141	3.08308	0.641189	3.08308	0.57531	3.08308	0.676441	3.08308	0.538982	3.08308	0.673185	3.08308	0.558093	3.10511	0.595224
142	3.10511	0.641189	3.10511	0.57531	3.10511	0.676441	3.10511	0.538982	3.10511	0.673185	3.10511	0.558093	3.12713	0.595224
143	3.12713	0.641189	3.12713	0.57531	3.12713	0.676441	3.12713	0.538982	3.12713	0.673185	3.12713	0.558093	3.14915	0.595224
144	3.14915	0.641189	3.14915	0.57531	3.14915	0.676441	3.14915	0.538982	3.14915	0.673185	3.14915	0.558093	3.17117	0.595224
145	3.17117	0.641189	3.17117	0.57531	3.17117	0.676441	3.17117	0.538982	3.17117	0.673185	3.17117	0.558093	3.19319	0.595224
146	3.19319	0.641189	3.19319	0.57531	3.19319	0.676441	3.19319	0.538982	3.19319	0.673185	3.19319	0.558093	3.21522	0.595224
147	3.21522	0.641189	3.21522	0.57531	3.21522	0.676441	3.21522	0.538982	3.21522	0.673185	3.21522	0.558093	3.23724	0.595224
148	3.23724	0.641189	3.23724	0.57531	3.23724	0.676441	3.23724	0.538982	3.23724	0.673185	3.23724	0.558093	3.25926	0.595224
149	3.25926	0.641189	3.25926	0.57531	3.25926	0.676441	3.25926	0.538982	3.25926	0.673185	3.25926	0.558093	3.28128	0.595224
150	3.28128	0.641189	3.28128	0.57531	3.28128	0.676441	3.28128	0.538982	3.28128	0.673185	3.28128	0.558093	3.3033	0.595224
151	3.3033	0.641189	3.3033	0.57531	3.3033	0.676441	3.3033	0.538982	3.3033	0.673185	3.3033	0.558093	3.32533	0.595224
152	3.32533	0.641189	3.32533	0.57531	3.32533	0.676441	3.32533	0.538982	3.32533	0.673185	3.32533	0.558093	3.34735	0.595224
153	3.34735	0.641189	3.34735	0.57531	3.34735	0.676441	3.34735	0.538982	3.34735	0.673185	3.34735	0.558093	3.36937	0.595224
154	3.36937	0.641189	3.36937	0.57531	3.36937	0.676441	3.36937	0.538982	3.36937	0.673185	3.36937	0.558093	3.39139	0.595224
155	3.39139	0.641189	3.39139	0.57531	3.39139	0.676441	3.39139	0.538982	3.39139	0.673185	3.39139	0.558093	3.41341	0.595224
156	3.41341	0.641189	3.41341	0.57531	3.41341	0.676441	3.41341	0.538982	3.41341	0.673185	3.41341	0.558093	3.43544	0.595224
157	3.43544	0.641189	3.43544	0.57531	3.43544	0.676441	3.43544	0.538982	3.43544	0.673185	3.43544	0.558093	3.45746	0.595224
158	3.45746	0.641189	3.45746	0.57531	3.45746	0.676441	3.45746	0.538982	3.45746	0.673185	3.45746	0.558093	3.47948	0.595224
159	3.47948	0.641189	3.47948	0.57531	3.47948	0.676441	3.47948	0.538982	3.47948	0.673185	3.47948	0.558093	3.5015	0.595224
160	3.5015	0.641189	3.5015	0.57531	3.5015	0.676441	3.5015	0.538982	3.5015	0.673185	3.5015	0.558093	3.52352	0.595224
161	3.52352	0.641189	3.52352	0.57531	3.52352	0.676441	3.52352	0.538982	3.52352	0.673185	3.52352	0.558093	3.54555	0.595224
162	3.54555	0.641189	3.54555	0.57531	3.54555	0.676441	3.54555	0.538982	3.54555	0.673185	3.54555	0.558093	3.56757	0.595224
163	3.56757	0.641189	3.56757	0.57531	3.56757	0.676441	3.56757	0.538982	3.56757	0.673185	3.56757	0.558093	3.58959	0.595224
164	3.58959	0.641189	3.58959	0.57531	3.58959	0.676441	3.58959	0.538982	3.58959	0.673185	3.58959	0.558093	3.61161	0.595224
165	3.61161	0.641189	3.61161	0.57531	3.61161	0.676441	3.61161	0.538982	3.61161	0.673185	3.61161	0.558093	3.63363	0.595224
166	3.63363	0.641189	3.63363	0.57531	3.63363	0.676441	3.63363	0.538982	3.63363	0.673185	3.63363	0.558093	3.65566	0.595224
167	3.65566	0.641189	3.65566	0.57531	3.65566	0.676441	3.65566	0.538982	3.65566	0.673185	3.65566	0.558093	3.67768	0.595224
168	3.67768	0.641189	3.67768	0.57531	3.67768	0.676441	3.67768	0.538982	3.67768	0.673185	3.67768	0.558093	3.6997	0.595224
169	3.6997	0.641189	3.6997	0.57531	3.6997	0.676441	3.6997	0.538982	3.6997	0.673185	3.6997	0.558093	3.72172	0.595224
170	3.72172	0.641189	3.72172	0.57531	3.72172	0.676441	3.72172	0.538982	3.72172	0.673185	3.72172	0.558093	3.74374	0.595224
171	3.74374	0.641189	3.74374	0.57531	3.74374	0.676441	3.74374	0.538982	3.74374	0.673185	3.74374	0.558093	3.76577	0.595224
172	3.76577	0.641189	3.76577	0.57531	3.76577	0.676441	3.76577	0.538982	3.76577	0.673185	3.76577	0.558093	3.78779	0.595224
173	3.78779	0.641189	3.78779	0.57531	3.78779	0.676441	3.78779	0.538982	3.78779	0.673185	3.78779	0.558093	3.80981	0.595224
174	3.80981	0.641189	3.80981	0.57531	3.80981	0.676441	3.80981	0.538982	3.80981	0.673185	3.80981	0.558093	3.83183	0.595224
175	3.83183	0.641189	3.83183	0.57531	3.83183	0.676441	3.83183	0.538982	3.83183	0.673185	3.83183	0.558093	3.85385	0.595224
176	3.85385	0.641189	3.85385	0.57531	3.85385	0.676441	3.85385	0.538982	3.85385	0.673185	3.85385	0.558093	3.87588	0.595224
177	3.87588	0.641189	3.87588	0.57531	3.87588	0.676441	3.87588	0.538982	3.87588	0.673185	3.87588	0.558093	3.8979	0.595224
178	3.8979	0.641189	3.8979	0.57531	3.8979	0.676441	3.8979	0.538982	3.8979	0.673185	3.8979	0.558093	3.91992	0.595224
179	3.91992	0.641189	3.91992	0.57531	3.91992	0.676441	3.91992	0.538982	3.91992	0.673185	3.91992	0.558093	3.94194	0.595224
180	3.94194	0.641189	3.94194	0.57531	3.94194	0.676441	3.94194	0.538982	3.94194	0.673185	3.94194	0.558093	3.96396	0.595224
181	3.96396	0.641189	3.96396	0.57531	3.96396	0.676441	3.96396	0.538982	3.96396	0.673185	3.96396	0.558093	3.98599	0.595224
182	3.98599	0.641189	3.98599	0.57531	3.98599	0.676441	3.98599	0.538982	3.98599	0.673185	3.98599	0.558093	4.00801	0.595224
183	4.00801	0.641189	4.00801	0.57531	4.00801	0.676441	4.00801	0.538982	4.00801	0.673185	4.00801	0.558093	4.03003	0.595224
184	4.03003	0.641189	4.03003	0.57531	4.03003	0.676441	4.03003	0.538982	4.03003	0.673185	4.03003	0.558093	4.05205	0.595224
185	4.05205	0.641189	4.05205	0.57531	4.05205	0.676441	4.05205	0.538982	4.05205	0.673185	4.05205	0.558093	4.07407	0.595224
186	4.07407	0.641189	4.07407	0.57531	4.07407	0.676441	4.07407	0.538982	4.07407	0.673185	4.07407	0.558093	4.0961	0.595224
187	4.0961	0.641189	4.0961	0.57531	4.0961	0.676441	4.0961	0.538982	4.0961	0.673185	4.0961	0.558093	4.11812	0.595224
188	4.11812	0.641189	4.11812	0.57531	4.11812	0.676441	4.11812	0.538982	4.11812	0.673185	4.11812	0.558093	4.14014	0.595224
189	4.14014	0.641189	4.14014	0.57531	4.14014	0.676441	4.14014	0.538982	4.14014	0.673185	4.14014	0.558093	4.16216	0.595224
190	4.16216	0.641189	4.16216	0.57531	4.16216	0.676441	4.16216	0.538982	4.16216	0.673185	4.16216	0.558093	4.18418	0.595224
191	4.18418	0.641189	4.18418	0.57531	4.18418	0.676441	4.18418	0.538982	4.18418	0.673185	4.18418	0.558093	4.20621	0.595224
192	4.20621	0.641189	4.20621	0.57531	4.20621	0.676441	4.20621	0.538982	4.20621	0.673185	4.20621	0.558093	4.22823	0.595224
193	4.22823	0.641189	4.22823	0.57531	4.22823	0.676441	4.22823	0.538982	4.22823	0.673185	4.22823	0.558093	4.25025	0.595224
194	4.25025	0.641189	4.25025	0.57531	4.25025	0.676441	4.25025	0.538982	4.25025	0.673185	4.25025	0.558093	4.27227	0.595224
195	4.27227	0.641189	4.27227	0.57531	4.27227	0.676441	4.27227	0.538982	4.27227	0.673185	4.27227	0.558093	4.29429	0.595224
196	4.29429	0.641189	4.29429	0.57531	4.29429	0.676441	4.29429	0.538982	4.29429	0.673185	4.29429	0.558093	4.31632	0.595224
197	4.31632	0.641189	4.31632	0.57531	4.31632	0.676441	4.31632	0.538982	4.31632	0.673185	4.31632	0.558093	4.33834	0.595224
198	4.33834	0.641189	4.33834	0.57531	4.33834	0.676441	4.33834	0.538982	4.33834	0.673185	4.33834	0.558093	4.36036	0.595224
199	4.36036	0.641189	4.36036	0.57531	4.36036	0.676441	4.36036	0.538982	4.36036	0.673185	4.36036	0.558093	4.38238	0.595224
200	4.38238	0.641189	4.38238	0.57531	4.38238	0.676441	4.38238	0.538982	4.38238	0.673185	4.38238	0.558093	4.4044	0.595224
201	4.4044	0.641189	4.4044	0.57531	4.4044	0.676441	4.4044	0.538982	4.4044	0.673185	4.4044	0.558093	4.42643	0.595224
202	4.42643	0.641189	4.42643	0.57531	4.42643	0.676441	4.42643	0.538982	4.42643	0.673185	4.42643	0.558093	4.44845	0.595224
203	4.44845	0.641189	4.44845	0.57531	4.44845	0.676441	4.44845	0.538982	4.44845	0.673185	4.44845	0.558093	4.47047	0.595224
204	4.47047	0.641189	4.47047	0.57531	4.47047	0.676441	4.47047	0.538982	4.47047	0.673185	4.47047	0.558093	4.49249	0.595224
205	4.49249	0.641189	4.49249	0.57531	4.49249	0.676441	4.49249	0.538982	4.49249	0.673185	4.49249	0.558093	4.51451	0.595224
206	4.51451	0.641189	4.51451	0.57531	4.51451	0.676441	4.51451	0.538982	4.51451	0.673185	4.51451	0.558093	4.53654	0.595224
207	4.53654	0.641189	4.53654	0.57531	4.53654	0.676441	4.53654	0.538982	4.53654	0.673185	4.53654	0.558093	4.55856	0.595224
208	4.55856	0.641189	4.55856	0.57531	4.55856	0.676441	4.55856	0.538982	4.55856	0.673185	4.55856	0.558093	4.58058	0.595224
209	4.58058	0.641189	4.58058	0.57531	4.58058	0.676441	4.58058	0.538982	4.58058	0.673185	4.58058	0.558093	4.6026	0.595224
210	4.6026	0.641189	4.6026	0.57531	4.6026	0.676441	4.6026	0.538982	4.6026	0.673185	4.6026	0.558093	4.62462	0.595224
211	4.62462	0.641189	4.62462	0.57531	4.62462	0.676441	4.62462	0.538982	4.62462	0.673185	4.62462	0.558093	4.64665	0.595224
212	4.64665	0.641189	4.64665	0.57531	4.64665	0.676441	4.64665	0.538982	4.64665	0.673185	4.64665	0.558093	4.66867	0.595224
213	4.66867	0.641189	4.66867	0.57531	4.66867	0.676441	4.66867	0.538982	4.66867	0.673185	4.66867	0.558093	4.69069	0.595224
214	4.69069	0.641189	4.69069	0.57531	4.69069	0.676441	4.69069	0.538982	4.69069	0.673185	4.69069	0.558093	4.71271	0.595224
215	4.71271	0.641189	4.71271	0.57531	4.71271	0.676441	4.71271	0.538982	4.71271	0.673185	4.71271	0.558093	4.73473	0.595224
216	4.73473	0.641189	4.73473	0.57531	4.73473	0.676441	4.73473	0.538982	4.73473	0.673185	4.73473	0.558093	4.75676	0.595224
217	4.75676	0.641189	4.75676	0.57531	4.75676	0.676441	4.75676	0.538982	4.75676	0.673185	4.75676	0.558093	4.77878	0.595224
218	4.77878	0.641189	4.77878	0.57531	4.77878	0.676441	4.77878	0.538982	4.77878	0.673185	4.77878	0.558093	4.8008	0.595224
219	4.8008	0.641189	4.8008	0.57531	4.8008	0.676441	4.8008	0.538982	4.8008	0.673185	4.8008	0.558093	4.82282	0.595224
220	4.82282	0.641189	4.82282	0.57531	4.82282	0.676441	4.82282	0.538982	4.82282	0.673185	4.82282	0.558093	4.84484	0.595224
221	4.84484	0.641189	4.84484	0.57531	4.84484	0.676441	4.84484	0.538982	4.84484	0.673185	4.84484	0.558093	4.86687	0.595224
222	4.86687	0.641189	4.86687	0.57531	4.86687	0.676441	4.86687	0.538982	4.86687	0.673185	4.86687	0.558093	4.88889	0.595224
223	4.88889	0.641189	4.88889	0.57531	4.88889	0.676441	4.88889	0.538982	4.88889	0.673185	4.88889	0.558093	4.91091	0.595224
224	4.91091	0.641189	4.91091	0.57531	4.91091	0.676441	4.91091	0.538982	4.91091	0.673185	4.91091	0.558093	4.93293	0.595224
225	4.93293	0.641189	4.93293	0.57531	4.93293	0.676441	4.93293	0.538982	4.93293	0.673185	4.93293	0.558093	4.95495	0.595224
226	4.95495	0.641189	4.95495	0.57531	4.95495	0.676441	4.95495	0.538982	4.95495	0.673185	4.95495	0.558093	4.97698	0.595224
227	4.97698	0.641189	4.97698	0.57531	4.97698	0.676441	4.97698	0.538982	4.97698	0.673185	4.97698	0.558093	4.999	0.595224
228	4.999	0.641189	4.999	0.57531	4.999	0.676441	4.999	0.538982	4.999	0.673185	4.999	0.558093	5.02102	0.595224
229	5.02102	0.641189	5.02102	0.57531	5.02102	0.676441	5.02102	0.538982	5.02102	0.673185	5.02102	0.558093	5.04304	0.595224
230	5.04304	0.641189	5.04304	0.57531	5.04304	0.676441	5.04304	0.538982	5.04304	0.673185	5.04304	0.558093	5.06507	0.595224
231	5.06507	0.641189	5.06507	0.57531	5.06507	0.676441	5.06507	0.538982	5.06507	0.673185	5.06507	0.558093	5.08709	0.595224
232	5.08709	0.641189	5.08709	0.57531	5.08709	0.676441	5.08709	0.538982	5.08709	0.673185	5.08709	0.558093	5.10911	0.595224
233	5.10911	0.641189	5.10911	0.57531	5.10911	0.676441	5.10911	0.538982	5.10911	0.673185	5.10911	0.558093	5.13113	0.595224
234	5.13113	0.641189	5.13113	0.57531	5.13113	0.676441	5.13113	0.538982	5.13113	0.673185	5.13113	0.558093	5.15315	0.595224
235	5.15315	0.641189	5.15315	0.57531	5.15315	0.676441	5.15315	0.538982	5.15315	0.673185	5.15315	0.558093	5.17518	0.595224
236	5.17518	0.641189	5.17518	0.57531	5.17518	0.676441	5.17518	0.538982	5.17518	0.673185	5.17518	0.558093	5.1972	0.595224
237	5.1972	0.641189	5.1972	0.57531	5.1972	0.676441	5.1972	0.538982	5.1972	0.673185	5.1972	0.558093	5.21922	0.595224
238	5.21922	0.641189	5.21922	0.57531	5.21922	0.676441	5.21922	0.538982	5.21922	0.673185	5.21922	0.558093	5.24124	0.595224
239	5.24124	0.641189	5.24124	0.57531	5.24124	0.676441	5.24124	0.538982	5.24124	0.673185	5.24124	0.558093	5.26326	0.595224
240	5.26326	0.641189	5.26326	0.57531	5.26326	0.676441	5.26326	0.538982	5.26326	0.673185	5.26326	0.558093	5.28529	0.595224
241	5.28529	0.61507	5.28529	0.550133	5.28529	0.651677	5.28529	0.510665	5.28529	0.649762	5.28529	0.531972	5.30731	0.595224
242	5.30731	0.61507	5.30731	0.550133	5.30731	0.651677	5.30731	0.510665	5.30731	0.649762	5.30731	0.531972	5.32933	0.595224
243	5.32933	0.61507	5.32933	0.550133	5.32933	0.651677	5.32933	0.510665	5.32933	0.649762	5.32933	0.531972	5.35135	0.595224
244	5.35135	0.61507	5.35135	0.550133	5.35135	0.651677	5.35135	0.510665	5.35135	0.649762	5.35135	0.531972	5.37337	0.595224
245	5.37337	0.61507	5.37337	0.550133	5.37337	0.651677	5.37337	0.510665	5.37337	0.649762	5.37337	0.531972	5.3954	0.595224
246	5.3954	0.61507	5.3954	0.550133	5.3954	0.651677	5.3954	0.510665	5.3954	0.649762	5.3954	0.531972	5.41742	0.595224
247	5.41742	0.61507	5.41742	0.550133	5.41742	0.651677	5.41742	0.510665	5.41742	0.649762	5.41742	0.531972	5.43944	0.595224
248	5.43944	0.61507	5.43944	0.550133	5.43944	0.651677	5.43944	0.510665	5.43944	0.649762	5.43944	0.531972	5.46146	0.595224
249	5.46146	0.61507	5.46146	0.550133	5.46146	0.651677	5.46146	0.510665	5.46146	0.649762	5.46146	0.531972	5.48348	0.595224
250	5.48348	0.61507	5.48348	0.550133	5.48348	0.651677	5.48348	0.510665	5.48348	0.649762	5.48348	0.531972	5.50551	0.595224
251	5.50551	0.61507	5.50551	0.550133	5.50551	0.651677	5.50551	0.510665	5.50551	0.649762	5.50551	0.531972	5.52753	0.595224
252	5.52753	0.61507	5.52753	0.550133	5.52753	0.651677	5.52753	0.510665	5.52753	0.649762	5.52753	0.531972	5.54955	0.595224
253	5.54955	0.61507	5.54955	0.550133	5.54955	0.651677	5.54955	0.510665	5.54955	0.649762	5.54955	0.531972	5.57157	0.595224
254	5.57157	0.61507	5.57157	0.550133	5.57157	0.651677	5.57157	0.510665	5.57157	0.649762	5.57157	0.531972	5.59359	0.595224
255	5.59359	0.61507	5.59359	0.550133	5.59359	0.651677	5.59359	0.510665	5.59359	0.649762	5.59359	0.531972	5.61562	0.595224
256	5.61562	0.61507	5.61562	0.550133	5.61562	0.651677	5.61562	0.510665	5.61562	0.649762	5.61562	0.531972	5.63764	0.595224
257	5.63764	0.61507	5.63764	0.550133	5.63764	0.651677	5.63764	0.510665	5.63764	0.649762	5.63764	0.531972	5.65966	0.595224
258	5.65966	0.61507	5.65966	0.550133	5.65966	0.651677	5.65966	0.510665	5.65966	0.649762	5.65966	0.531972	5.68168	0.595224
259	5.68168	0.61507	5.68168	0.550133	5.68168	0.651677	5.68168	0.510665	5.68168	0.649762	5.68168	0.531972	5.7037	0.595224
260	5.7037	0.61507	5.7037	0.550133	5.7037	0.651677	5.7037	0.510665	5.7037	0.649762	5.7037	0.531972	5.72573	0.595224
261	5.72573	0.61507	5.72573	0.550133	5.72573	0.651677	5.72573	0.510665	5.72573	0.649762	5.72573	0.531972	5.74775	0.595224
262	5.74775	0.61507	5.74775	0.550133	5.74775	0.651677	5.74775	0.510665	5.74775	0.649762	5.74775	0.531972	5.76977	0.595224
263	5.76977	0.61507	5.76977	0.550133	5.76977	0.651677	5.76977	0.510665	5.76977	0.649762	5.76977	0.531972	5.79179	0.595224
264	5.79179	0.61507	5.79179	0.550133	5.79179	0.651677	5.79179	0.510665	5.79179	0.649762	5.79179	0.531972	5.81381	0.595224
265	5.81381	0.61507	5.81381	0.550133	5.81381	0.651677	5.81381	0.510665	5.81381	0.649762	5.81381	0.531972	5.83584	0.595224
266	5.83584	0.61507	5.83584	0.550133	5.83584	0.651677	5.83584	0.510665	5.83584	0.649762	5.83584	0.531972	5.85786	0.595224
267	5.85786	0.61507	5.85786	0.550133	5.85786	0.651677	5.85786	0.510665	5.85786	0.649762	5.85786	0.531972	5.87988	0.595224
268	5.87988	0.61507	5.87988	0.550133	5.87988	0.651677	5.87988	0.510665	5.87988	0.649762	5.87988	0.531972	5.9019	0.595224
269	5.9019	0.61507	5.9019	0.550133	5.9019	0.651677	5.9019	0.510665	5.9019	0.649762	5.9019	0.531972	5.92392	0.595224
270	5.92392	0.61507	5.92392	0.550133	5.92392	0.651677	5.92392	0.510665	5.92392	0.649762	5.92392	0.531972	5.94595	0.595224
271	5.94595	0.61507	5.94595	0.550133	5.94595	0.651677	5.94595	0.510665	5.94595	0.649762	5.94595	0.531972	5.96797	0.595224
272	5.96797	0.61507	5.96797	0.550133	5.96797	0.651677	5.96797	0.510665	5.96797	0.649762	5.96797	0.531972	5.98999	0.595224
273	5.98999	0.61507	5.98999	0.550133	5.98999	0.651677	5.98999	0.510665	5.98999	0.649762	5.98999	0.531972	6.01201	0.595224
274	6.01201	0.61507	6.01201	0.550133	6.01201	0.651677	6.01201	0.510665	6.01201	0.649762	6.01201	0.531972	6.03403	0.595224
275	6.03403	0.61507	6.03403	0.550133	6.03403	0.651677	6.03403	0.510665	6.03403	0.649762	6.03403	0.531972	6.05606	0.595224
276	6.05606	0.61507	6.05606	0.550133	6.05606	0.651677	6.05606	0.510665	6.05606	0.649762	6.05606	0.531972	6.07808	0.595224
277	6.07808	0.61507	6.07808	0.550133	6.07808	0.651677	6.07808	0.510665	6.07808	0.649762	6.07808	0.531972	6.1001	0.595224
278	6.1001	0.61507	6.1001	0.550133	6.1001	0.651677	6.1001	0.510665	6.1001	0.649762	6.1001	0.531972	6.12212	0.595224
279	6.12212	0.61507	6.12212	0.550133	6.12212	0.651677	6.12212	0.510665	6.12212	0.649762	6.12212	0.531972	6.14414	0.595224
280	6.14414	0.61507	6.14414	0.550133	6.14414	0.651677	6.14414	0.510665	6.14414	0.649762	6.14414	0.531972	6.16617	0.595224
281	6.16617	0.61507	6.16617	0.550133	6.16617	0.651677	6.16617	0.510665	6.16617	0.649762	6.16617	0.531972	6.18819	0.595224
282	6.18819	0.61507	6.18819	0.550133	6.18819	0.651677	6.18819	0.510665	6.18819	0.649762	6.18819	0.531972	6.21021	0.595224
283	6.21021	0.61507	6.21021	0.550133	6.21021	0.651677	6.21021	0.510665	6.21021	0.649762	6.21021	0.531972	6.23223	0.595224
284	6.23223	0.61507	6.23223	0.550133	6.23223	0.651677	6.23223	0.510665	6.23223	0.649762	6.23223	0.531972	6.25425	0.595224
285	6.25425	0.61507	6.25425	0.550133	6.25425	0.651677	6.25425	0.510665	6.25425	0.649762	6.25425	0.531972	6.27628	0.595224
286	6.27628	0.61507	6.27628	0.550133	6.27628	0.651677	6.27628	0.510665	6.27628	0.649762	6.27628	0.531972	6.2983	0.595224
287	6.2983	0.61507	6.2983	0.550133	6.2983	0.651677	6.2983	0.510665	6.2983	0.649762	6.2983	0.531972	6.32032	0.595224
288	6.32032	0.61507	6.32032	0.550133	6.32032	0.651677	6.32032	0.510665	6.32032	0.649762	6.32032	0.531972	6.34234	0.595224
289	6.34234	0.61507	6.34234	0.550133	6.34234	0.651677	6.34234	0.510665	6.34234	0.649762	6.34234	0.531972	6.36436	0.595224
290	6.36436	0.61507	6.36436	0.550133	6.36436	0.651677	6.36436	0.510665	6.36436	0.649762	6.36436	0.531972	6.38639	0.595224
291	6.38639	0.61507	6.38639	0.550133	6.38639	0.651677	6.38639	0.510665	6.38639	0.649762	6.38639	0.531972	6.40841	0.595224
292	6.40841	0.61507	6.40841	0.550133	6.40841	0.651677	6.40841	0.510665	6.40841	0.649762	6.40841	0.531972	6.43043	0.595224
293	6.43043	0.61507	6.43043	0.550133	6.43043	0.651677	6.43043	0.510665	6.43043	0.649762	6.43043	0.531972	6.45245	0.595224
294	6.45245	0.61507	6.45245	0.550133	6.45245	0.651677	6.45245	0.510665	6.45245	0.649762	6.45245	0.531972	6.47447	0.595224
295	6.47447	0.61507	6.47447	0.550133	6.47447	0.651677	6.47447	0.510665	6.47447	0.649762	6.47447	0.531972	6.4965	0.595224
296	6.4965	0.61507	6.4965	0.550133	6.4965	0.651677	6.4965	0.510665	6.4965	0.649762	6.4965	0.531972	6.51852	0.595224
297	6.51852	0.61507	6.51852	0.550133	6.51852	0.651677	6.51852	0.510665	6.51852	0.649762	6.51852	0.531972	6.54054	0.595224
298	6.54054	0.61507	6.54054	0.550133	6.54054	0.651677	6.54054	0.510665	6.54054	0.649762	6.54054	0.531972	6.56256	0.595224
299	6.56256	0.61507	6.56256	0.550133	6.56256	0.651677	6.56256	0.510665	6.56256	0.649762	6.56256	0.531972	6.58458	0.595224
300	6.58458	0.61507	6.58458	0.550133	6.58458	0.651677	6.58458	0.510665	6.58458	0.649762	6.58458	0.531972	6.60661	0.595224
301	6.60661	0.61507	6.60661	0.550133	6.60661	0.651677	6.60661	0.510665	6.60661	0.649762	6.60661	0.531972	6.62863	0.595224
302	6.62863	0.61507	6.62863	0.550133	6.62863	0.651677	6.62863	0.510665	6.62863	0.649762	6.62863	0.531972	6.65065	0.595224
303	6.65065	0.61507	6.65065	0.550133	6.65065	0.651677	6.65065	0.510665	6.65065	0.649762	6.65065	0.531972	6.67267	0.595224
304	6.67267	0.61507	6.67267	0.550133	6.67267	0.651677	6.67267	0.510665	6.67267	0.649762	6.67267	0.531972	6.69469	0.595224
305	6.69469	0.61507	6.69469	0.550133	6.69469	0.651677	6.69469	0.510665	6.69469	0.649762	6.69469	0.531972	6.71672	0.595224
306	6.71672	0.61507	6.71672	0.550133	6.71672	0.651677	6.71672	0.510665	6.71672	0.649762	6.71672	0.531972	6.73874	0.595224
307	6.73874	0.61507	6.73874	0.550133	6.73874	0.651677	6.73874	0.510665	6.73874	0.649762	6.73874	0.531972	6.76076	0.595224
308	6.76076	0.61507	6.76076	0.550133	6.76076	0.651677	6.76076	0.510665	6.76076	0.649762	6.76076	0.531972	6.78278	0.595224
309	6.78278	0.61507	6.78278	0.550133	6.78278	0.651677	6.78278	0.510665	6.78278	0.649762	6.78278	0.531972	6.8048	0.595224
310	6.8048	0.61507	6.8048	0.550133	6.8048	0.651677	6.8048	0.510665	6.8048	0.649762	6.8048	0.531972	6.82683	0.595224
311	6.82683	0.61507	6.82683	0.550133	6.82683	0.651677	6.82683	0.510665	6.82683	0.649762	6.82683	0.531972	6.84885	0.595224
312	6.84885	0.61507	6.84885	0.550133	6.84885	0.651677	6.84885	0.510665	6.84885	0.649762	6.84885	0.531972	6.87087	0.595224
313	6.87087	0.61507	6.87087	0.550133	6.87087	0.651677	6.87087	0.510665	6.87087	0.649762	6.87087	0.531972	6.89289	0.595224
314	6.89289	0.61507	6.89289	0.550133	6.89289	0.651677	6.89289	0.510665	6.89289	0.649762	6.89289	0.531972	6.91491	0.595224
315	6.91491	0.61507	6.91491	0.550133	6.91491	0.651677	6.91491	0.510665	6.91491	0.649762	6.91491	0.531972	6.93694	0.595224
316	6.93694	0.61507	6.93694	0.550133	6.93694	0.651677	6.93694	0.510665	6.93694	0.649762	6.93694	0.531972	6.95896	0.595224
317	6.95896	0.61507	6.95896	0.550133	6.95896	0.651677	6.95896	0.510665	6.95896	0.649762	6.95896	0.531972	6.98098	0.595224
318	6.98098	0.61507	6.98098	0.550133	6.98098	0.651677	6.98098	0.510665	6.98098	0.649762	6.98098	0.531972	7.003	0.595224
319	7.003	0.61507	7.003	0.550133	7.003	0.651677	7.003	0.510665	7.003	0.649762	7.003	0.531972	7.02503	0.595224
320	7.02503	0.61507	7.02503	0.550133	7.02503	0.651677	7.02503	0.510665	7.02503	0.649762	7.02503	0.531972	7.04705	0.595224
321	7.04705	0.61507	7.04705	0.550133	7.04705	0.651677	7.04705	0.510665	7.04705	0.649762	7.04705	0.531972	7.06907	0.595224
322	7.06907	0.61507	7.06907	0.550133	7.06907	0.651677	7.06907	0.510665	7.06907	0.649762	7.06907	0.531972	7.09109	0.595224
323	7.09109	0.61507	7.09109	0.550133	7.09109	0.651677	7.09109	0.510665	7.09109	0.649762	7.09109	0.531972	7.11311	0.595224
324	7.11311	0.61507	7.11311	0.550133	7.11311	0.651677	7.11311	0.510665	7.11311	0.649762	7.11311	0.531972	7.13514	0.595224
325	7.13514	0.61507	7.13514	0.550133	7.13514	0.651677	7.13514	0.510665	7.13514	0.649762	7.13514	0.531972	7.15716	0.595224
326	7.15716	0.61507	7.15716	0.550133	7.15716	0.651677	7.15716	0.510665	7.15716	0.649762	7.15716	0.531972	7.17918	0.595224
327	7.17918	0.61507	7.17918	0.550133	7.17918	0.651677	7.17918	0.510665	7.17918	0.649762	7.17918	0.531972	7.2012	0.595224
328	7.2012	0.61507	7.2012	0.550133	7.2012	0.651677	7.2012	0.510665	7.2012	0.649762	7.2012	0.531972	7.22322	0.595224
329	7.22322	0.61507	7.22322	0.550133	7.22322	0.651677	7.22322	0.510665	7.22322	0.649762	7.22322	0.531972	7.24525	0.595224
330	7.24525	0.61507	7.24525	0.550133	7.24525	0.651677	7.24525	0.510665	7.24525	0.649762	7.24525	0.531972	7.26727	0.595224
331	7.26727	0.61507	7.26727	0.550133	7.26727	0.651677	7.26727	0.510665	7.26727	0.649762	7.26727	0.531972	7.28929	0.595224
332	7.28929	0.61507	7.28929	0.550133	7.28929	0.651677	7.28929	0.510665	7.28929	0.649762	7.28929	0.531972	7.31131	0.595224
333	7.31131	0.61507	7.31131	0.550133	7.31131	0.651677	7.31131	0.510665	7.31131	0.649762	7.31131	0.531972	7.33333	0.595224
334	7.33333	0.61507	7.33333	0.550133	7.33333	0.651677	7.33333	0.510665	7.33333	0.649762	7.33333	0.531972	7.35536	0.595224
335	7.35536	0.61507	7.35536	0.550133	7.35536	0.651677	7.35536	0.510665	7.35536	0.649762	7.35536	0.531972	7.37738	0.595224
336	7.37738	0.61507	7.37738	0.550133	7.37738	0.651677	7.37738	0.510665	7.37738	0.649762	7.37738	0.531972	7.3994	0.595224
337	7.3994	0.61507	7.3994	0.550133	7.3994	0.651677	7.3994	0.510665	7.3994	0.649762	7.3994	0.531972	7.42142	0.595224
338	7.42142	0.61507	7.42142	0.550133	7.42142	0.651677	7.42142	0.510665	7.42142	0.649762	7.42142	0.531972	7.44344	0.595224
339	7.44344	0.61507	7.44344	0.550133	7.44344	0.651677	7.44344	0.510665	7.44344	0.649762	7.44344	0.531972	7.46547	0.595224
340	7.46547	0.61507	7.46547	0.550133	7.46547	0.651677	7.46547	0.510665	7.46547	0.649762	7.46547	0.531972	7.48749	0.595224
341	7.48749	0.61507	7.48749	0.550133	7.48749	0.651677	7.48749	0.510665	7.48749	0.649762	7.48749	0.531972	7.50951	0.595224
342	7.50951	0.61507	7.50951	0.550133	7.50951	0.651677	7.50951	0.510665	7.50951	0.649762	7.50951	0.531972	7.53153	0.595224
343	7.53153	0.61507	7.53153	0.550133	7.53153	0.651677	7.53153	0.510665	7.53153	0.649762	7.53153	0.531972	7.55355	0.595224
344	7.55355	0.61507	7.55355	0.550133	7.55355	0.651677	7.55355	0.510665	7.55355	0.649762	7.55355	0.531972	7.57558	0.595224
345	7.57558	0.61507	7.57558	0.550133	7.57558	0.651677	7.57558	0.510665	7.57558	0.649762	7.57558	0.531972	7.5976	0.595224
346	7.5976	0.61507	7.5976	0.550133	7.5976	0.651677	7.5976	0.510665	7.5976	0.649762	7.5976	0.531972	7.61962	0.595224
347	7.61962	0.61507	7.61962	0.550133	7.61962	0.651677	7.61962	0.510665	7.61962	0.649762	7.61962	0.531972	7.64164	0.595224
348	7.64164	0.61507	7.64164	0.550133	7.64164	0.651677	7.64164	0.510665	7.64164	0.649762	7.64164	0.531972	7.66366	0.595224
349	7.66366	0.61507	7.66366	0.550133	7.66366	0.651677	7.66366	0.510665	7.66366	0.649762	7.66366	0.531972	7.68569	0.595224
350	7.68569	0.61507	7.68569	0.550133	7.68569	0.651677	7.68569	0.510665	7.68569	0.649762	7.68569	0.531972	7.70771	0.595224
351	7.70771	0.61507	7.70771	0.550133	7.70771	0.651677	7.70771	0.510665	7.70771	0.649762	7.70771	0.531972	7.72973	0.595224
352	7.72973	0.61507	7.72973	0.550133	7.72973	0.651677	7.72973	0.510665	7.72973	0.649762	7.72973	0.531972	7.75175	0.595224
353	7.75175	0.61507	7.75175	0.550133	7.75175	0.651677	7.75175	0.510665	7.75175	0.649762	7.75175	0.531972	7.77377	0.595224
354	7.77377	0.61507	7.77377	0.550133	7.77377	0.651677	7.77377	0.510665	7.77377	0.649762	7.77377	0.531972	7.7958	0.595224
355	7.7958	0.61507	7.7958	0.550133	7.7958	0.651677	7.7958	0.510665	7.7958	0.649762	7.7958	0.531972	7.81782	0.595224
356	7.81782	0.61507	7.81782	0.550133	7.81782	0.651677	7.81782	0.510665	7.81782	0.649762	7.81782	0.531972	7.83984	0.595224
357	7.83984	0.61507	7.83984	0.550133	7.83984	0.651677	7.83984	0.510665	7.83984	0.649762	7.83984	0.531972	7.86186	0.595224
358	7.86186	0.61507	7.86186	0.550133	7.86186	0.651677	7.86186	0.510665	7.86186	0.649762	7.86186	0.531972	7.88388	0.595224
359	7.88388	0.61507	7.88388	0.550133	7.88388	0.651677	7.88388	0.510665	7.88388	0.649762	7.88388	0.531972	7.90591	0.595224
360	7.90591	0.61507	7.90591	0.550133	7.90591	0.651677	7.90591	0.510665	7.90591	0.649762	7.90591	0.531972	7.92793	0.595224
361	7.92793	0.61507	7.92793	0.550133	7.92793	0.651677	7.92793	0.510665	7.92793	0.649762	7.92793	0.531972	7.94995	0.595224
362	7.94995	0.61507	7.94995	0.550133	7.94995	0.651677	7.94995	0.510665	7.94995	0.649762	7.94995	0.531972	7.97197	0.595224
363	7.97197	0.61507	7.97197	0.550133	7.97197	0.651677	7.97197	0.510665	7.97197	0.649762	7.97197	0.531972	7.99399	0.595224
364	7.99399	0.61507	7.99399	0.550133	7.99399	0.651677	7.99399	0.510665	7.99399	0.649762	7.99399	0.531972	8.01602	0.595224
365	8.01602	0.61507	8.01602	0.550133	8.01602	0.651677	8.01602	0.510665	8.01602	0.649762	8.01602	0.531972	8.03804	0.595224
366	8.03804	0.61507	8.03804	0.550133	8.03804	0.651677	8.03804	0.510665	8.03804	0.649762	8.03804	0.531972	8.06006	0.595224
367	8.06006	0.61507	8.06006	0.550133	8.06006	0.651677	8.06006	0.510665	8.06006	0.649762	8.06006	0.531972	8.08208	0.595224
368	8.08208	0.61507	8.08208	0.550133	8.08208	0.651677	8.08208	0.510665	8.08208	0.649762	8.08208	0.531972	8.1041	0.595224
369	8.1041	0.61507	8.1041	0.550133	8.1041	0.651677	8.1041	0.510665	8.1041	0.649762	8.1041	0.531972	8.12613	0.595224
370	8.12613	0.61507	8.12613	0.550133	8.12613	0.651677	8.12613	0.510665	8.12613	0.649762	8.12613	0.531972	8.14815	0.595224
371	8.14815	0.61507	8.14815	0.550133	8.14815	0.651677	8.14815	0.510665	8.14815	0.649762	8.14815	0.531972	8.17017	0.595224
372	8.17017	0.61507	8.17017	0.550133	8.17017	0.651677	8.17017	0.510665	8.17017	0.649762	8.17017	0.531972	8.19219	0.595224
373	8.19219	0.61507	8.19219	0.550133	8.19219	0.651677	8.19219	0.510665	8.19219	0.649762	8.19219	0.531972	8.21421	0.595224
374	8.21421	0.61507	8.21421	0.550133	8.21421	0.651677	8.21421	0.510665	8.21421	0.649762	8.21421	0.531972	8.23624	0.595224
375	8.23624	0.61507	8.23624	0.550133	8.23624	0.651677	8.23624	0.510665	8.23624	0.649762	8.23624	0.531972	8.25826	0.595224
376	8.25826	0.61507	8.25826	0.550133	8.25826	0.651677	8.25826	0.510665	8.25826	0.649762	8.25826	0.531972	8.28028	0.595224
377	8.28028	0.61507	8.28028	0.550133	8.28028	0.651677	8.28028	0.510665	8.28028	0.649762	8.28028	0.531972	8.3023	0.595224
378	8.3023	0.61507	8.3023	0.550133	8.3023	0.651677	8.3023	0.510665	8.3023	0.649762	8.3023	0.531972	8.32432	0.595224
379	8.32432	0.61507	8.32432	0.550133	8.32432	0.651677	8.32432	0.510665	8.32432	0.649762	8.32432	0.531972	8.34635	0.595224
380	8.34635	0.61507	8.34635	0.550133	8.34635	0.651677	8.34635	0.510665	8.34635	0.649762	8.34635	0.531972	8.36837	0.595224
381	8.36837	0.61507	8.36837	0.550133	8.36837	0.651677	8.36837	0.510665	8.36837	0.649762	8.36837	0.531972	8.39039	0.595224
382	8.39039	0.61507	8.39039	0.550133	8.39039	0.651677	8.39039	0.510665	8.39039	0.649762	8.39039	0.531972	8.41241	0.595224
383	8.41241	0.61507	8.41241	0.550133	8.41241	0.651677	8.41241	0.510665	8.41241	0.649762	8.41241	0.531972	8.43443	0.595224
384	8.43443	0.61507	8.43443	0.550133	8.43443	0.651677	8.43443	0.510665	8.43443	0.649762	8.43443	0.531972	8.45646	0.595224
385	8.45646	0.61507	8.45646	0.550133	8.45646	0.651677	8.45646	0.510665	8.45646	0.649762	8.45646	0.531972	8.47848	0.595224
386	8.47848	0.61507	8.47848	0.550133	8.47848	0.651677	8.47848	0.510665	8.47848	0.649762	8.47848	0.531972	8.5005	0.595224
387	8.5005	0.61507	8.5005	0.550133	8.5005	0.651677	8.5005	0.510665	8.5005	0.649762	8.5005	0.531972	8.52252	0.595224
388	8.52252	0.61507	8.52252	0.550133	8.52252	0.651677	8.52252	0.510665	8.52252	0.649762	8.52252	0.531972	8.54454	0.595224
389	8.54454	0.61507	8.54454	0.550133	8.54454	0.651677	8.54454	0.510665	8.54454	0.649762	8.54454	0.531972	8.56657	0.595224
390	8.56657	0.61507	8.56657	0.550133	8.56657	0.651677	8.56657	0.510665	8.56657	0.649762	8.56657	0.531972	8.58859	0.595224
391	8.58859	0.61507	8.58859	0.550133	8.58859	0.651677	8.58859	0.510665	8.58859	0.649762	8.58859	0.531972	8.61061	0.595224
392	8.61061	0.61507	8.61061	0.550133	8.61061	0.651677	8.61061	0.510665	8.61061	0.649762	8.61061	0.531972	8.63263	0.595224
393	8.63263	0.61507	8.63263	0.550133	8.63263	0.651677	8.63263	0.510665	8.63263	0.649762	8.63263	0.531972	8.65465	0.595224
394	8.65465	0.61507	8.65465	0.550133	8.65465	0.651677	8.65465	0.510665	8.65465	0.649762	8.65465	0.531972	8.67668	0.595224
395	8.67668	0.61507	8.67668	0.550133	8.67668	0.651677	8.67668	0.510665	8.67668	0.649762	8.67668	0.531972	8.6987	0.595224
396	8.6987	0.61507	8.6987	0.550133	8.6987	0.651677	8.6987	0.510665	8.6987	0.649762	8.6987	0.531972	8.72072	0.595224
397	8.72072	0.61507	8.72072	0.550133	8.72072	0.651677	8.72072	0.510665	8.72072	0.649762	8.72072	0.531972	8.74274	0.595224
398	8.74274	0.61507	8.74274	0.550133	8.74274	0.651677	8.74274	0.510665	8.74274	0.649762	8.74274	0.531972	8.76476	0.595224
399	8.76476	0.61507	8.76476	0.550133	8.76476	0.651677	8.76476	0.510665	8.76476	0.649762	8.76476	0.531972	8.78679	0.595224
400	8.78679	0.61507	8.78679	0.550133	8.78679	0.651677	8.78679	0.466981	8.78679	0.649762	8.78679	0.531972	8.80881	0.595224
401	8.80881	0.61507	8.80881	0.524384	8.80881	0.651677	8.80881	0.466981	8.80881	0.649762	8.80881	0.531972	8.83083	0.595224
402	8.83083	0.61507	8.83083	0.524384	8.83083	0.600452	8.83083	0.466981	8.83083	0.649762	8.83083	0.531972	8.85285	0.595224
403	8.85285	0.61507	8.85285	0.524384	8.85285	0.600452	8.85285	0.466981	8.85285	0.649762	8.85285	0.531972	8.87487	0.595224
404	8.87487	0.61507	8.87487	0.524384	8.87487	0.600452	8.87487	0.466981	8.87487	0.649762	8.87487	0.531972	8.8969	0.595224
405	8.8969	0.61507	8.8969	0.524384	8.8969	0.600452	8.8969	0.466981	8.8969	0.649762	8.8969	0.491674	0.11011	0.583055
406	8.91892	0.61507	8.91892	0.524384	8.91892	0.600452	8.91892	0.466981	8.91892	0.574142	8.91892	0.491674	8.91892	0.558303
407	8.94094	0.61507	8.94094	0.524384	8.94094	0.600452	8.94094	0.466981	8.94094	0.574142	8.94094	0.491674	8.94094	0.558303
408	8.96296	0.61507	8.96296	0.524384	8.96296	0.600452	8.96296	0.466981	8.96296	0.574142	8.96296	0.491674	8.96296	0.558303
409	8.98498	0.61507	8.98498	0.524384	8.98498	0.600452	8.98498	0.466981	8.98498	0.574142	8.98498	0.491674	8.98498	0.558303
410	9.00701	0.561039	9.00701	0.524384	9.00701	0.600452	9.00701	0.466981	9.00701	0.574142	9.00701	0.491674	9.00701	0.558303
411	9.02903	0.561039	9.02903	0.524384	9.02903	0.600452	9.02903	0.466981	9.02903	0.574142	9.02903	0.491674	9.02903	0.558303
412	9.05105	0.561039	9.05105	0.524384	9.05105	0.600452	9.05105	0.466981	9.05105	0.574142	9.05105	0.491674	9.05105	0.558303
413	9.07307	0.561039	9.07307	0.524384	9.07307	0.600452	9.07307	0.466981	9.07307	0.574142	9.07307	0.491674	9.07307	0.558303
414	9.0951	0.561039	9.0951	0.524384	9.0951	0.600452	9.0951	0.466981	9.0951	0.574142	9.0951	0.491674	9.0951	0.558303
415	9.11712	0.561039	9.11712	0.524384	9.11712	0.600452	9.11712	0.466981	9.11712	0.574142	9.11712	0.491674	9.11712	0.558303
416	9.13914	0.561039	9.13914	0.524384	9.13914	0.600452	9.13914	0.466981	9.13914	0.574142	9.13914	0.491674	9.13914	0.558303
417	9.16116	0.561039	9.16116	0.524384	9.16116	0.600452	9.16116	0.466981	9.16116	0.574142	9.16116	0.491674	9.16116	0.558303
418	9.18318	0.561039	9.18318	0.524384	9.18318	0.600452	9.18318	0.466981	9.18318	0.574142	9.18318	0.491674	9.18318	0.558303
419	9.20521	0.561039	9.20521	0.524384	9.20521	0.600452	9.20521	0.466981	9.20521	0.574142	9.20521	0.491674	9.20521	0.558303
420	9.22723	0.561039	9.22723	0.489141	9.22723	0.600452	9.22723	0.466981	9.22723	0.539786	9.22723	0.454697	9.22723	0.558303
421	9.24925	0.561039	9.24925	0.489141	9.24925	0.600452	9.24925	0.466981	9.24925	0.539786	9.24925	0.454697	9.24925	0.558303
422	9.27127	0.561039	9.27127	0.489141	9.27127	0.600452	9.27127	0.466981	9.27127	0.539786	9.27127	0.454697	9.27127	0.558303
423	9.29329	0.561039	9.29329	0.489141	9.29329	0.600452	9.29329	0.466981	9.29329	0.539786	9.29329	0.454697	9.29329	0.558303
424	9.31532	0.561039	9.31532	0.489141	9.31532	0.600452	9.31532	0.466981	9.31532	0.539786	9.31532	0.454697	9.31532	0.558303
425	9.33734	0.561039	9.33734	0.489141	9.33734	0.600452	9.33734	0.466981	9.33734	0.539786	9.33734	0.454697	9.33734	0.558303
426	9.35936	0.561039	9.35936	0.489141	9.35936	0.600452	9.35936	0.466981	9.35936	0.539786	9.35936	0.454697	9.35936	0.558303
427	9.38138	0.561039	9.38138	0.489141	9.38138	0.600452	9.38138	0.466981	9.38138	0.539786	9.38138	0.454697	9.38138	0.558303
428	9.4034	0.561039	9.4034	0.489141	9.4034	0.600452	9.4034	0.466981	9.4034	0.539786	9.4034	0.454697	9.4034	0.558303
429	9.42543	0.561039	9.42543	0.489141	9.42543	0.600452	9.42543	0.466981	9.42543	0.539786	9.42543	0.454697	9.42543	0.558303
430	9.44745	0.561039	9.44745	0.489141	9.44745	0.600452	9.44745	0.466981	9.44745	0.539786	9.44745	0.454697	9.44745	0.558303
431	9.46947	0.561039	9.46947	0.489141	9.46947	0.600452	9.46947	0.466981	9.46947	0.539786	9.46947	0.454697	9.46947	0.558303
432	9.49149	0.561039	9.49149	0.489141	9.49149	0.600452	9.49149	0.466981	9.49149	0.539786	9.49149	0.454697	9.49149	0.558303
433	9.51351	0.561039	9.51351	0.489141	9.51351	0.600452	9.51351	0.466981	9.51351	0.539786	9.51351	0.454697	9.51351	0.558303
434	9.53554	0.561039	9.53554	0.489141	9.53554	0.600452	9.53554	0.466981	9.53554	0.539786	9.53554	0.454697	9.53554	0.558303
435	9.55756	0.561039	9.55756	0.489141	9.55756	0.600452	9.55756	0.466981	9.55756	0.539786	9.55756	0.454697	9.55756	0.558303
436	9.57958	0.561039	9.57958	0.489141	9.57958	0.600452	9.57958	0.466981	9.57958	0.539786	9.57958	0.454697	9.57958	0.558303
437	9.6016	0.561039	9.6016	0.489141	9.6016	0.600452	9.6016	0.466981	9.6016	0.539786	9.6016	0.454697	9.6016	0.558303
438	9.62362	0.561039	9.62362	0.489141	9.62362	0.600452	9.62362	0.466981	9.62362	0.539786	9.62362	0.454697	9.62362	0.558303
439	9.64565	0.561039	9.64565	0.489141	9.64565	0.600452	9.64565	0.466981	9.64565	0.539786	9.64565	0.454697	9.64565	0.558303
440	9.66767	0.561039	9.66767	0.489141	9.66767	0.600452	9.66767	0.466981	9.66767	0.539786	9.66767	0.454697	9.66767	0.558303
441	9.68969	0.561039	9.68969	0.489141	9.68969	0.600452	9.68969	0.466981	9.68969	0.539786	9.68969	0.454697	9.68969	0.558303
442	9.71171	0.561039	9.71171	0.489141	9.71171	0.600452	9.71171	0.466981	9.71171	0.539786	9.71171	0.454697	9.71171	0.558303
443	9.73373	0.561039	9.73373	0.489141	9.73373	0.600452	9.73373	0.466981	9.73373	0.539786	9.73373	0.454697	9.73373	0.558303
444	9.75576	0.561039	9.75576	0.489141	9.75576	0.600452	9.75576	0.466981	9.75576	0.539786	9.75576	0.454697	9.75576	0.558303
445	9.77778	0.561039	9.77778	0.489141	9.77778	0.600452	9.77778	0.466981	9.77778	0.539786	9.77778	0.454697	9.77778	0.558303
446	9.7998	0.561039	9.7998	0.489141	9.7998	0.600452	9.7998	0.466981	9.7998	0.539786	9.7998	0.454697	9.7998	0.558303
447	9.82182	0.561039	9.82182	0.489141	9.82182	0.600452	9.82182	0.466981	9.82182	0.539786	9.82182	0.454697	9.82182	0.558303
448	9.84384	0.561039	9.84384	0.489141	9.84384	0.600452	9.84384	0.466981	9.84384	0.539786	9.84384	0.454697	9.84384	0.558303
449	9.86587	0.561039	9.86587	0.489141	9.86587	0.600452	9.86587	0.466981	9.86587	0.539786	9.86587	0.454697	9.86587	0.558303
450	9.88789	0.561039	9.88789	0.489141	9.88789	0.600452	9.88789	0.466981	9.88789	0.539786	9.88789	0.454697	9.88789	0.558303
451	9.90991	0.561039	9.90991	0.489141	9.90991	0.600452	9.90991	0.466981	9.90991	0.539786	9.90991	0.454697	9.90991	0.558303
452	9.93193	0.561039	9.93193	0.489141	9.93193	0.600452	9.93193	0.466981	9.93193	0.539786	9.93193	0.454697	9.93193	0.558303
453	9.95395	0.561039	9.95395	0.489141	9.95395	0.600452	9.95395	0.466981	9.95395	0.539786	9.95395	0.454697	9.95395	0.558303
454	9.97598	0.561039	9.97598	0.489141	9.97598	0.600452	9.97598	0.466981	9.97598	0.539786	9.97598	0.454697	9.97598	0.558303
455	9.998	0.561039	9.998	0.489141	9.998	0.600452	9.998	0.466981	9.998	0.539786	9.998	0.454697	9.998	0.558303
456	10.02	0.561039	10.02	0.489141	10.02	0.600452	10.02	0.466981	10.02	0.539786	10.02	0.454697	10.02	0.558303
457	10.042	0.561039	10.042	0.489141	10.042	0.600452	10.042	0.466981	10.042	0.539786	10.042	0.454697	10.042	0.558303
458	10.0641	0.561039	10.0641	0.489141	10.0641	0.600452	10.0641	0.466981	10.0641	0.539786	10.0641	0.454697	10.0641	0.558303
459	10.0861	0.561039	10.0861	0.489141	10.0861	0.600452	10.0861	0.466981	10.0861	0.539786	10.0861	0.454697	10.0861	0.558303
460	10.1081	0.561039	10.1081	0.489141	10.1081	0.600452	10.1081	0.466981	10.1081	0.539786	10.1081	0.454697	10.1081	0.558303
461	10.1301	0.561039	10.1301	0.489141	10.1301	0.600452	10.1301	0.466981	10.1301	0.539786	10.1301	0.454697	10.1301	0.558303
462	10.1522	0.561039	10.1522	0.489141	10.1522	0.600452	10.1522	0.466981	10.1522	0.539786	10.1522	0.454697	10.1522	0.558303
463	10.1742	0.561039	10.1742	0.489141	10.1742	0.600452	10.1742	0.466981	10.1742	0.539786	10.1742	0.454697	10.1742	0.558303
464	10.1962	0.561039	10.1962	0.489141	10.1962	0.600452	10.1962	0.466981	10.1962	0.539786	10.1962	0.454697	10.1962	0.558303
465	10.2182	0.561039	10.2182	0.489141	10.2182	0.600452	10.2182	0.466981	10.2182	0.539786	10.2182	0.454697	10.2182	0.558303
466	10.2402	0.561039	10.2402	0.489141	10.2402	0.600452	10.2402	0.466981	10.2402	0.539786	10.2402	0.454697	10.2402	0.558303
467	10.2623	0.561039	10.2623	0.489141	10.2623	0.600452	10.2623	0.466981	10.2623	0.539786	10.2623	0.454697	10.2623	0.558303
468	10.2843	0.561039	10.2843	0.489141	10.2843	0.600452	10.2843	0.466981	10.2843	0.539786	10.2843	0.454697	10.2843	0.558303
469	10.3063	0.561039	10.3063	0.489141	10.3063	0.600452	10.3063	0.466981	10.3063	0.539786	10.3063	0.454697	10.3063	0.558303
470	10.3283	0.561039	10.3283	0.489141	10.3283	0.600452	10.3283	0.466981	10.3283	0.539786	10.3283	0.454697	10.3283	0.558303
471	10.3504	0.561039	10.3504	0.489141	10.3504	0.600452	10.3504	0.466981	10.3504	0.539786	10.3504	0.454697	10.3504	0.558303
472	10.3724	0.561039	10.3724	0.489141	10.3724	0.600452	10.3724	0.466981	10.3724	0.539786	10.3724	0.454697	10.3724	0.558303
473	10.3944	0.561039	10.3944	0.489141	10.3944	0.600452	10.3944	0.466981	10.3944	0.539786	10.3944	0.454697	10.3944	0.558303
474	10.4164	0.561039	10.4164	0.489141	10.4164	0.600452	10.4164	0.466981	10.4164	0.539786	10.4164	0.454697	10.4164	0.558303
475	10.4384	0.561039	10.4384	0.489141	10.4384	0.600452	10.4384	0.466981	10.4384	0.539786	10.4384	0.454697	10.4384	0.558303
476	10.4605	0.561039	10.4605	0.489141	10.4605	0.600452	10.4605	0.466981	10.4605	0.539786	10.4605	0.454697	10.4605	0.558303
477	10.4825	0.561039	10.4825	0.489141	10.4825	0.600452	10.4825	0.466981	10.4825	0.539786	10.4825	0.454697	10.4825	0.558303
478	10.5045	0.561039	10.5045	0.489141	10.5045	0.600452	10.5045	0.466981	10.5045	0.539786	10.5045	0.454697	10.5045	0.558303
479	10.5265	0.561039	10.5265	0.489141	10.5265	0.600452	10.5265	0.466981	10.5265	0.539786	10.5265	0.454697	10.5265	0.558303
480	10.5485	0.561039	10.5485	0.489141	10.5485	0.600452	10.5485	0.466981	10.5485	0.539786	10.5485	0.454697	10.5485	0.558303
481	10.5706	0.561039	10.5706	0.489141	10.5706	0.600452	10.5706	0.466981	10.5706	0.539786	10.5706	0.454697	10.5706	0.558303
482	10.5926	0.561039	10.5926	0.489141	10.5926	0.600452	10.5926	0.466981	10.5926	0.539786	10.5926	0.454697	10.5926	0.558303
483	10.6146	0.561039	10.6146	0.489141	10.6146	0.600452	10.6146	0.466981	10.6146	0.539786	10.6146	0.454697	10.6146	0.558303
484	10.6366	0.561039	10.6366	0.489141	10.6366	0.600452	10.6366	0.466981	10.6366	0.539786	10.6366	0.454697	10.6366	0.558303
485	10.6587	0.561039	10.6587	0.489141	10.6587	0.600452	10.6587	0.466981	10.6587	0.539786	10.6587	0.454697	10.6587	0.558303
486	10.6807	0.561039	10.6807	0.489141	10.6807	0.600452	10.6807	0.466981	10.6807	0.539786	10.6807	0.454697	10.6807	0.558303
487	10.7027	0.561039	10.7027	0.489141	10.7027	0.600452	10.7027	0.466981	10.7027	0.539786	10.7027	0.454697	10.7027	0.558303
488	10.7247	0.561039	10.7247	0.489141	10.7247	0.600452	10.7247	0.466981	10.7247	0.539786	10.7247	0.454697	10.7247	0.558303
489	10.7467	0.561039	10.7467	0.489141	10.7467	0.600452	10.7467	0.466981	10.7467	0.539786	10.7467	0.454697	10.7467	0.558303
490	10.7688	0.561039	10.7688	0.489141	10.7688	0.600452	10.7688	0.466981	10.7688	0.539786	10.7688	0.454697	10.7688	0.558303
491	10.7908	0.561039	10.7908	0.489141	10.7908	0.600452	10.7908	0.466981	10.7908	0.539786	10.7908	0.454697	10.7908	0.558303
492	10.8128	0.561039	10.8128	0.489141	10.8128	0.600452	10.8128	0.466981	10.8128	0.539786	10.8128	0.454697	10.8128	0.558303
493	10.8348	0.561039	10.8348	0.489141	10.8348	0.600452	10.8348	0.466981	10.8348	0.539786	10.8348	0.454697	10.8348	0.558303
494	10.8569	0.561039	10.8569	0.489141	10.8569	0.600452	10.8569	0.466981	10.8569	0.539786	10.8569	0.454697	10.8569	0.558303
495	10.8789	0.561039	10.8789	0.489141	10.8789	0.600452	10.8789	0.466981	10.8789	0.539786	10.8789	0.454697	10.8789	0.558303
496	10.9009	0.561039	10.9009	0.489141	10.9009	0.600452	10.9009	0.466981	10.9009	0.539786	10.9009	0.454697	10.9009	0.558303
497	10.9229	0.561039	10.9229	0.489141	10.9229	0.600452	10.9229	0.466981	10.9229	0.539786	10.9229	0.454697	10.9229	0.558303
498	10.9449	0.561039	10.9449	0.489141	10.9449	0.600452	10.9449	0.466981	10.9449	0.539786	10.9449	0.454697	10.9449	0.558303
499	10.967	0.561039	10.967	0.489141	10.967	0.600452	10.967	0.466981	10.967	0.539786	10.967	0.454697	10.967	0.558303
500	10.989	0.561039	10.989	0.489141	10.989	0.600452	10.989	0.466981	10.989	0.539786	10.989	0.454697	10.989	0.558303
501	11.011	0.561039	11.011	0.489141	11.011	0.600452	11.011	0.466981	11.011	0.539786	11.011	0.454697	11.011	0.558303
502	11.033	0.561039	11.033	0.489141	11.033	0.600452	11.033	0.466981	11.033	0.539786	11.033	0.454697	11.033	0.558303
503	11.0551	0.561039	11.0551	0.489141	11.0551	0.600452	11.0551	0.466981	11.0551	0.539786	11.0551	0.454697	11.0551	0.558303
504	11.0771	0.561039	11.0771	0.489141	11.0771	0.600452	11.0771	0.466981	11.0771	0.539786	11.0771	0.454697	11.0771	0.558303
505	11.0991	0.561039	11.0991	0.489141	11.0991	0.600452	11.0991	0.466981	11.0991	0.539786	11.0991	0.454697	11.0991	0.558303
506	11.1211	0.561039	11.1211	0.489141	11.1211	0.600452	11.1211	0.466981	11.1211	0.539786	11.1211	0.454697	11.1211	0.558303
507	11.1431	0.561039	11.1431	0.489141	11.1431	0.600452	11.1431	0.466981	11.1431	0.539786	11.1431	0.454697	11.1431	0.558303
508	11.1652	0.561039	11.1652	0.489141	11.1652	0.600452	11.1652	0.466981	11.1652	0.539786	11.1652	0.454697	11.1652	0.558303
509	11.1872	0.561039	11.1872	0.489141	11.1872	0.600452	11.1872	0.466981	11.1872	0.539786	11.1872	0.454697	11.1872	0.558303
510	11.2092	0.561039	11.2092	0.489141	11.2092	0.600452	11.2092	0.466981	11.2092	0.539786	11.2092	0.454697	11.2092	0.558303
511	11.2312	0.561039	11.2312	0.489141	11.2312	0.600452	11.2312	0.466981	11.2312	0.539786	11.2312	0.454697	11.2312	0.558303
512	11.2533	0.561039	11.2533	0.489141	11.2533	0.600452	11.2533	0.466981	11.2533	0.539786	11.2533	0.454697	11.2533	0.558303
513	11.2753	0.561039	11.2753	0.489141	11.2753	0.600452	11.2753	0.466981	11.2753	0.539786	11.2753	0.454697	11.2753	0.558303
514	11.2973	0.561039	11.2973	0.489141	11.2973	0.600452	11.2973	0.466981	11.2973	0.539786	11.2973	0.454697	11.2973	0.558303
515	11.3193	0.561039	11.3193	0.489141	11.3193	0.600452	11.3193	0.466981	11.3193	0.539786	11.3193	0.454697	11.3193	0.558303
516	11.3413	0.561039	11.3413	0.489141	11.3413	0.600452	11.3413	0.466981	11.3413	0.539786	11.3413	0.454697	11.3413	0.558303
517	11.3634	0.561039	11.3634	0.489141	11.3634	0.600452	11.3634	0.466981	11.3634	0.539786	11.3634	0.454697	11.3634	0.558303
518	11.3854	0.561039	11.3854	0.489141	11.3854	0.600452	11.3854	0.466981	11.3854	0.539786	11.3854	0.454697	11.3854	0.558303
519	11.4074	0.561039	11.4074	0.489141	11.4074	0.600452	11.4074	0.466981	11.4074	0.539786	11.4074	0.454697	11.4074	0.558303
520	11.4294	0.561039	11.4294	0.489141	11.4294	0.600452	11.4294	0.390826	11.4294	0.539786	11.4294	0.454697	11.4294	0.558303
521	11.4515	0.561039	11.4515	0.489141	11.4515	0.600452	11.4515	0.390826	11.4515	0.539786	11.4515	0.454697	11.4515	0.558303
522	11.4735	0.561039	11.4735	0.489141	11.4735	0.600452	11.4735	0.390826	11.4735	0.539786	11.4735	0.454697	11.4735	0.558303
523	11.4955	0.489999	11.4955	0.489141	11.4955	0.600452	11.4955	0.390826	11.4955	0.456287	11.4955	0.454697	11.4955	0.558303
524	11.5175	0.489999	11.5175	0.489141	11.5175	0.600452	11.5175	0.390826	11.5175	0.456287	11.5175	0.454697	11.5175	0.558303
525	11.5395	0.489999	11.5395	0.489141	11.5395	0.600452	11.5395	0.390826	11.5395	0.456287	11.5395	0.454697	11.5395	0.558303
526	11.5616	0.489999	11.5616	0.489141	11.5616	0.600452	11.5616	0.390826	11.5616	0.456287	11.5616	0.454697	11.5616	0.558303
527	11.5836	0.489999	11.5836	0.489141	11.5836	0.5331	11.5836	0.390826	11.5836	0.456287	11.5836	0.454697	11.5836	0.558303
528	11.6056	0.489999	11.6056	0.489141	11.6056	0.5331	11.6056	0.390826	11.6056	0.456287	11.6056	0.454697	11.6056	0.558303
529	11.6276	0.489999	11.6276	0.489141	11.6276	0.5331	11.6276	0.390826	11.6276	0.456287	11.6276	0.454697	11.6276	0.558303
530	11.6496	0.430227	11.6496	0.43426	11.6496	0.419312	11.6496	0.326749	11.6496	0.413529	11.6496	0.411754	11.6496	0.520119
531	11.6717	0.430227	11.6717	0.352171	11.6717	0.419312	11.6717	0.326749	11.6717	0.413529	11.6717	0.411754	11.6717	0.520119
532	11.6937	0.430227	11.6937	0.352171	11.6937	0.419312	11.6937	0.326749	11.6937	0.413529	11.6937	0.411754	11.6937	0.520119
533	11.7157	0.430227	11.7157	0.352171	11.7157	0.419312	11.7157	0.326749	11.7157	0.413529	11.7157	0.326588	11.7157	0.520119
534	11.7377	0.430227	11.7377	0.352171	11.7377	0.419312	11.7377	0.326749	11.7377	0.413529	11.7377	0.326588	11.7377	0.520119
535	11.7598	0.430227	11.7598	0.352171	11.7598	0.419312	11.7598	0.326749	11.7598	0.413529	11.7598	0.326588	11.7598	0.520119
536	11.7818	0.430227	11.7818	0.352171	11.7818	0.419312	11.7818	0.326749	11.7818	0.413529	11.7818	0.326588	11.7818	0.520119
537	11.8038	0.430227	11.8038	0.352171	11.8038	0.419312	11.8038	0.326749	11.8038	0.413529	11.8038	0.326588	11.8038	0.520119
538	11.8258	0.430227	11.8258	0.352171	11.8258	0.419312	11.8258	0.326749	11.8258	0.413529	11.8258	0.326588	11.8258	0.520119
539	11.8478	0.430227	11.8478	0.352171	11.8478	0.419312	11.8478	0.326749	11.8478	0.413529	11.8478	0.326588	11.8478	0.520119
540	11.8699	0.430227	11.8699	0.352171	11.8699	0.419312	11.8699	0.326749	11.8699	0.413529	11.8699	0.326588	11.8699	0.520119
541	11.8919	0.430227	11.8919	0.352171	11.8919	0.419312	11.8919	0.326749	11.8919	0.413529	11.8919	0.326588	11.8919	0.467166
542	11.9139	0.430227	11.9139	0.352171	11.9139	0.419312	11.9139	0.326749	11.9139	0.413529	11.9139	0.326588	11.9139	0.467166
543	11.9359	0.430227	11.9359	0.352171	11.9359	0.419312	11.9359	0.326749	11.9359	0.413529	11.9359	0.326588	11.9359	0.467166
544	11.958	0.430227	11.958	0.352171	11.958	0.419312	11.958	0.326749	11.958	0.413529	11.958	0.326588	11.958	0.467166
545	11.98	0.430227	11.98	0.352171	11.98	0.419312	11.98	0.326749	11.98	0.413529	11.98	0.326588	11.98	0.467166
546	12.002	0.430227	12.002	0.352171	12.002	0.419312	12.002	0.326749	12.002	0.413529	12.002	0.326588	12.002	0.467166
547	12.024	0.430227	12.024	0.352171	12.024	0.419312	12.024	0.326749	12.024	0.413529	12.024	0.326588	12.024	0.467166
548	12.046	0.430227	12.046	0.352171	12.046	0.419312	12.046	0.326749	12.046	0.413529	12.046	0.326588	12.046	0.467166
549	12.0681	0.430227	12.0681	0.352171	12.0681	0.419312	12.0681	0.326749	12.0681	0.413529	12.0681	0.326588	12.0681	0.467166
550	12.0901	0.430227	12.0901	0.352171	12.0901	0.419312	12.0901	0.326749	12.0901	0.413529	12.0901	0.326588	12.0901	0.467166
551	12.1121	0.430227	12.1121	0.352171	12.1121	0.419312	12.1121	0.326749	12.1121	0.413529	12.1121	0.326588	12.1121	0.467166
552	12.1341	0.430227	12.1341	0.352171	12.1341	0.419312	12.1341	0.326749	12.1341	0.413529	12.1341	0.326588	12.1341	0.467166
553	12.1562	0.430227	12.1562	0.352171	12.1562	0.419312	12.1562	0.326749	12.1562	0.413529	12.1562	0.326588	12.1562	0.467166
554	12.1782	0.430227	12.1782	0.352171	12.1782	0.419312	12.1782	0.326749	12.1782	0.413529	12.1782	0.326588	12.1782	0.467166
555	12.2002	0.430227	12.2002	0.352171	12.2002	0.419312	12.2002	0.326749	12.2002	0.413529	12.2002	0.326588	12.2002	0.467166
556	12.2222	0.430227	12.2222	0.352171	12.2222	0.419312	12.2222	0.326749	12.2222	0.413529	12.2222	0.326588	12.2222	0.467166
557	12.2442	0.430227	12.2442	0.352171	12.2442	0.419312	12.2442	0.326749	12.2442	0.413529	12.2442	0.326588	12.2442	0.467166
558	12.2663	0.430227	12.2663	0.352171	12.2663	0.419312	12.2663	0.326749	12.2663	0.413529	12.2663	0.326588	12.2663	0.467166
559	12.2883	0.430227	12.2883	0.352171	12.2883	0.419312	12.2883	0.326749	12.2883	0.413529	12.2883	0.326588	12.2883	0.467166
560	12.3103	0.430227	12.3103	0.352171	12.3103	0.419312	12.3103	0.326749	12.3103	0.413529	12.3103	0.326588	12.3103	0.467166
561	12.3323	0.430227	12.3323	0.352171	12.3323	0.419312	12.3323	0.326749	12.3323	0.413529	12.3323	0.326588	12.3323	0.467166
562	12.3544	0.430227	12.3544	0.352171	12.3544	0.419312	12.3544	0.326749	12.3544	0.413529	12.3544	0.326588	12.3544	0.467166
563	12.3764	0.430227	12.3764	0.352171	12.3764	0.419312	12.3764	0.326749	12.3764	0.413529	12.3764	0.326588	12.3764	0.467166
564	12.3984	0.430227	12.3984	0.352171	12.3984	0.419312	12.3984	0.326749	12.3984	0.413529	12.3984	0.326588	12.3984	0.467166
565	12.4204	0.430227	12.4204	0.352171	12.4204	0.419312	12.4204	0.326749	12.4204	0.413529	12.4204	0.326588	12.4204	0.467166
566	12.4424	0.430227	12.4424	0.352171	12.4424	0.419312	12.4424	0.326749	12.4424	0.413529	12.4424	0.326588	12.4424	0.467166
567	12.4645	0.430227	12.4645	0.352171	12.4645	0.419312	12.4645	0.326749	12.4645	0.413529	12.4645	0.326588	12.4645	0.467166
568	12.4865	0.430227	12.4865	0.352171	12.4865	0.419312	12.4865	0.326749	12.4865	0.413529	12.4865	0.326588	12.4865	0.467166
569	12.5085	0.430227	12.5085	0.352171	12.5085	0.419312	12.5085	0.326749	12.5085	0.413529	12.5085	0.326588	12.5085	0.467166
570	12.5305	0.430227	12.5305	0.352171	12.5305	0.419312	12.5305	0.326749	12.5305	0.413529	12.5305	0.326588	12.5305	0.467166
571	12.5526	0.430227	12.5526	0.352171	12.5526	0.419312	12.5526	0.326749	12.5526	0.413529	12.5526	0.326588	12.5526	0.467166
572	12.5746	0.430227	12.5746	0.352171	12.5746	0.419312	12.5746	0.326749	12.5746	0.413529	12.5746	0.326588	12.5746	0.467166
573	12.5966	0.430227	12.5966	0.352171	12.5966	0.419312	12.5966	0.326749	12.5966	0.413529	12.5966	0.326588	12.5966	0.467166
574	12.6186	0.430227	12.6186	0.352171	12.6186	0.419312	12.6186	0.326749	12.6186	0.413529	12.6186	0.326588	12.6186	0.467166
575	12.6406	0.430227	12.6406	0.352171	12.6406	0.419312	12.6406	0.326749	12.6406	0.413529	12.6406	0.326588	12.6406	0.467166
576	12.6627	0.430227	12.6627	0.352171	12.6627	0.419312	12.6627	0.326749	12.6627	0.413529	12.6627	0.326588	12.6627	0.467166
577	12.6847	0.430227	12.6847	0.352171	12.6847	0.419312	12.6847	0.326749	12.6847	0.413529	12.6847	0.326588	12.6847	0.467166
578	12.7067	0.430227	12.7067	0.352171	12.7067	0.419312	12.7067	0.326749	12.7067	0.413529	12.7067	0.326588	12.7067	0.467166
579	12.7287	0.430227	12.7287	0.352171	12.7287	0.419312	12.7287	0.326749	12.7287	0.413529	12.7287	0.326588	12.7287	0.467166
580	12.7508	0.430227	12.7508	0.352171	12.7508	0.419312	12.7508	0.326749	12.7508	0.413529	12.7508	0.326588	12.7508	0.467166
581	12.7728	0.430227	12.7728	0.352171	12.7728	0.419312	12.7728	0.326749	12.7728	0.413529	12.7728	0.326588	12.7728	0.467166
582	12.7948	0.430227	12.7948	0.352171	12.7948	0.419312	12.7948	0.326749	12.7948	0.413529	12.7948	0.326588	12.7948	0.467166
583	12.8168	0.430227	12.8168	0.352171	12.8168	0.419312	12.8168	0.326749	12.8168	0.413529	12.8168	0.326588	12.8168	0.467166
584	12.8388	0.430227	12.8388	0.352171	12.8388	0.419312	12.8388	0.326749	12.8388	0.413529	12.8388	0.326588	12.8388	0.467166
585	12.8609	0.430227	12.8609	0.352171	12.8609	0.419312	12.8609	0.326749	12.8609	0.413529	12.8609	0.326588	12.8609	0.467166
586	12.8829	0.430227	12.8829	0.352171	12.8829	0.419312	12.8829	0.326749	12.8829	0.413529	12.8829	0.326588	12.8829	0.467166
587	12.9049	0.430227	12.9049	0.352171	12.9049	0.419312	12.9049	0.326749	12.9049	0.413529	12.9049	0.326588	12.9049	0.467166
588	12.9269	0.430227	12.9269	0.352171	12.9269	0.419312	12.9269	0.326749	12.9269	0.413529	12.9269	0.326588	12.9269	0.467166
589	12.9489	0.430227	12.9489	0.352171	12.9489	0.419312	12.9489	0.326749	12.9489	0.413529	12.9489	0.326588	12.9489	0.467166
590	12.971	0.430227	12.971	0.352171	12.971	0.419312	12.971	0.326749	12.971	0.413529	12.971	0.326588	12.971	0.467166
591	12.993	0.430227	12.993	0.352171	12.993	0.419312	12.993	0.326749	12.993	0.413529	12.993	0.326588	12.993	0.467166
592	13.015	0.430227	13.015	0.352171	13.015	0.419312	13.015	0.326749	13.015	0.413529	13.015	0.326588	13.015	0.467166
593	13.037	0.430227	13.037	0.352171	13.037	0.419312	13.037	0.326749	13.037	0.413529	13.037	0.326588	13.037	0.467166
594	13.0591	0.430227	13.0591	0.352171	13.0591	0.419312	13.0591	0.326749	13.0591	0.413529	13.0591	0.326588	13.0591	0.467166
595	13.0811	0.430227	13.0811	0.352171	13.0811	0.419312	13.0811	0.326749	13.0811	0.413529	13.0811	0.326588	13.0811	0.467166
596	13.1031	0.430227	13.1031	0.352171	13.1031	0.419312	13.1031	0.326749	13.1031	0.413529	13.1031	0.326588	13.1031	0.467166
597	13.1251	0.430227	13.1251	0.352171	13.1251	0.419312	13.1251	0.326749	13.1251	0.413529	13.1251	0.326588	13.1251	0.467166
598	13.1471	0.430227	13.1471	0.352171	13.1471	0.419312	13.1471	0.326749	13.1471	0.413529	13.1471	0.326588	13.1471	0.467166
599	13.1692	0.430227	13.1692	0.352171	13.1692	0.419312	13.1692	0.326749	13.1692	0.413529	13.1692	0.326588	13.1692	0.467166
600	13.1912	0.430227	13.1912	0.352171	13.1912	0.419312	13.1912	0.326749	13.1912	0.413529	13.1912	0.326588	13.1912	0.467166
601	13.2132	0.430227	13.2132	0.352171	13.2132	0.419312	13.2132	0.326749	13.2132	0.413529	13.2132	0.326588	13.2132	0.467166
602	13.2352	0.430227	13.2352	0.352171	13.2352	0.419312	13.2352	0.326749	13.2352	0.413529	13.2352	0.326588	13.2352	0.467166
603	13.2573	0.430227	13.2573	0.352171	13.2573	0.419312	13.2573	0.326749	13.2573	0.413529	13.2573	0.326588	13.2573	0.467166
604	13.2793	0.430227	13.2793	0.352171	13.2793	0.419312	13.2793	0.326749	13.2793	0.413529	13.2793	0.326588	13.2793	0.467166
605	13.3013	0.430227	13.3013	0.352171	13.3013	0.419312	13.3013	0.326749	13.3013	0.413529	13.3013	0.326588	13.3013	0.467166
606	13.3233	0.430227	13.3233	0.352171	13.3233	0.419312	13.3233	0.326749	13.3233	0.413529	13.3233	0.326588	13.3233	0.467166
607	13.3453	0.430227	13.3453	0.352171	13.3453	0.419312	13.3453	0.326749	13.3453	0.413529	13.3453	0.326588	13.3453	0.467166
608	13.3674	0.41486	13.3674	0.352171	13.3674	0.419312	13.3674	0.326749	13.3674	0.413529	13.3674	0.326588	13.3674	0.467166
609	13.3894	0.41486	13.3894	0.352171	13.3894	0.404098	13.3894	0.326749	13.3894	0.413529	13.3894	0.326588	13.3894	0.467166
610	13.4114	0.41486	13.4114	0.352171	13.4114	0.404098	13.4114	0.310276	13.4114	0.413529	13.4114	0.326588	13.4114	0.467166
611	13.4334	0.41486	13.4334	0.352171	13.4334	0.404098	13.4334	0.310276	13.4334	0.413529	13.4334	0.326588	13.4334	0.467166
612	13.4555	0.41486	13.4555	0.352171	13.4555	0.404098	13.4555	0.310276	13.4555	0.398954	13.4555	0.326588	13.4555	0.467166
613	13.4775	0.41486	13.4775	0.352171	13.4775	0.404098	13.4775	0.310276	13.4775	0.398954	13.4775	0.326588	13.4775	0.467166
614	13.4995	0.41486	13.4995	0.352171	13.4995	0.404098	13.4995	0.310276	13.4995	0.398954	13.4995	0.326588	13.4995	0.467166
615	13.5215	0.41486	13.5215	0.352171	13.5215	0.404098	13.5215	0.310276	13.5215	0.398954	13.5215	0.326588	13.5215	0.467166
616	13.5435	0.41486	13.5435	0.352171	13.5435	0.404098	13.5435	0.310276	13.5435	0.398954	13.5435	0.326588	13.5435	0.467166
617	13.5656	0.41486	13.5656	0.352171	13.5656	0.404098	13.5656	0.310276	13.5656	0.398954	13.5656	0.326588	13.5656	0.467166
618	13.5876	0.41486	13.5876	0.352171	13.5876	0.404098	13.5876	0.310276	13.5876	0.398954	13.5876	0.326588	13.5876	0.467166
619	13.6096	0.41486	13.6096	0.352171	13.6096	0.404098	13.6096	0.310276	13.6096	0.398954	13.6096	0.326588	13.6096	0.467166
620	13.6316	0.41486	13.6316	0.352171	13.6316	0.404098	13.6316	0.310276	13.6316	0.398954	13.6316	0.326588	13.6316	0.467166
621	13.6537	0.41486	13.6537	0.337135	13.6537	0.404098	13.6537	0.310276	13.6537	0.398954	13.6537	0.326588	13.6537	0.467166
622	13.6757	0.41486	13.6757	0.337135	13.6757	0.404098	13.6757	0.310276	13.6757	0.398954	13.6757	0.326588	13.6757	0.467166
623	13.6977	0.41486	13.6977	0.337135	13.6977	0.404098	13.6977	0.310276	13.6977	0.398954	13.6977	0.326588	13.6977	0.467166
624	13.7197	0.41486	13.7197	0.337135	13.7197	0.404098	13.7197	0.310276	13.7197	0.398954	13.7197	0.326588	13.7197	0.467166
625	13.7417	0.41486	13.7417	0.337135	13.7417	0.404098	13.7417	0.310276	13.7417	0.398954	13.7417	0.326588	13.7417	0.467166
626	13.7638	0.41486	13.7638	0.337135	13.7638	0.404098	13.7638	0.310276	13.7638	0.398954	13.7638	0.326588	13.7638	0.467166
627	13.7858	0.41486	13.7858	0.337135	13.7858	0.404098	13.7858	0.310276	13.7858	0.398954	13.7858	0.310988	13.7858	0.453552
628	13.8078	0.41486	13.8078	0.337135	13.8078	0.404098	13.8078	0.310276	13.8078	0.398954	13.8078	0.310988	13.8078	0.453552
629	13.8298	0.41486	13.8298	0.337135	13.8298	0.404098	13.8298	0.310276	13.8298	0.398954	13.8298	0.310988	13.8298	0.453552
630	13.8519	0.41486	13.8519	0.337135	13.8519	0.404098	13.8519	0.310276	13.8519	0.398954	13.8519	0.310988	13.8519	0.453552
631	13.8739	0.41486	13.8739	0.337135	13.8739	0.404098	13.8739	0.310276	13.8739	0.398954	13.8739	0.310988	13.8739	0.453552
632	13.8959	0.41486	13.8959	0.337135	13.8959	0.404098	13.8959	0.310276	13.8959	0.398954	13.8959	0.310988	13.8959	0.453552
633	13.9179	0.41486	13.9179	0.337135	13.9179	0.404098	13.9179	0.310276	13.9179	0.398954	13.9179	0.310988	13.9179	0.453552
634	13.9399	0.41486	13.9399	0.337135	13.9399	0.404098	13.9399	0.310276	13.9399	0.398954	13.9399	0.310988	13.9399	0.453552
635	13.962	0.41486	13.962	0.337135	13.962	0.404098	13.962	0.310276	13.962	0.398954	13.962	0.310988	13.962	0.453552
636	13.984	0.41486	13.984	0.337135	13.984	0.404098	13.984	0.310276	13.984	0.398954	13.984	0.310988	13.984	0.453552
637	14.006	0.41486	14.006	0.337135	14.006	0.404098	14.006	0.310276	14.006	0.398954	14.006	0.310988	14.006	0.453552
638	14.028	0.41486	14.028	0.337135	14.028	0.404098	14.028	0.310276	14.028	0.398954	14.028	0.310988	14.028	0.453552
639	14.0501	0.41486	14.0501	0.337135	14.0501	0.404098	14.0501	0.310276	14.0501	0.398954	14.0501	0.310988	14.0501	0.453552
640	14.0721	0.41486	14.0721	0.337135	14.0721	0.404098	14.0721	0.310276	14.0721	0.398954	14.0721	0.310988	14.0721	0.453552
641	14.0941	0.41486	14.0941	0.337135	14.0941	0.404098	14.0941	0.310276	14.0941	0.398954	14.0941	0.310988	14.0941	0.453552
642	14.1161	0.41486	14.1161	0.337135	14.1161	0.404098	14.1161	0.310276	14.1161	0.398954	14.1161	0.310988	14.1161	0.453552
643	14.1381	0.41486	14.1381	0.337135	14.1381	0.404098	14.1381	0.310276	14.1381	0.398954	14.1381	0.310988	14.1381	0.453552
644	14.1602	0.41486	14.1602	0.337135	14.1602	0.404098	14.1602	0.310276	14.1602	0.398954	14.1602	0.310988	14.1602	0.453552
645	14.1822	0.41486	14.1822	0.337135	14.1822	0.404098	14.1822	0.310276	14.1822	0.398954	14.1822	0.310988	14.1822	0.453552
646	14.2042	0.41486	14.2042	0.337135	14.2042	0.404098	14.2042	0.310276	14.2042	0.398954	14.2042	0.310988	14.2042	0.453552
647	14.2262	0.41486	14.2262	0.337135	14.2262	0.404098	14.2262	0.310276	14.2262	0.398954	14.2262	0.310988	14.2262	0.453552
648	14.2482	0.41486	14.2482	0.337135	14.2482	0.404098	14.2482	0.310276	14.2482	0.398954	14.2482	0.310988	14.2482	0.453552
649	14.2703	0.41486	14.2703	0.337135	14.2703	0.404098	14.2703	0.310276	14.2703	0.398954	14.2703	0.310988	14.2703	0.453552
650	14.2923	0.41486	14.2923	0.337135	14.2923	0.404098	14.2923	0.310276	14.2923	0.398954	14.2923	0.310988	14.2923	0.453552
651	14.3143	0.41486	14.3143	0.337135	14.3143	0.404098	14.3143	0.310276	14.3143	0.398954	14.3143	0.310988	14.3143	0.453552
652	14.3363	0.41486	14.3363	0.337135	14.3363	0.404098	14.3363	0.310276	14.3363	0.398954	14.3363	0.310988	14.3363	0.453552
653	14.3584	0.41486	14.3584	0.337135	14.3584	0.404098	14.3584	0.310276	14.3584	0.398954	14.3584	0.310988	14.3584	0.453552
654	14.3804	0.41486	14.3804	0.337135	14.3804	0.404098	14.3804	0.310276	14.3804	0.398954	14.3804	0.310988	14.3804	0.453552
655	14.4024	0.41486	14.4024	0.337135	14.4024	0.404098	14.4024	0.310276	14.4024	0.398954	14.4024	0.310988	14.4024	0.453552
656	14.4244	0.41486	14.4244	0.337135	14.4244	0.404098	14.4244	0.310276	14.4244	0.398954	14.4244	0.310988	14.4244	0.453552
657	14.4464	0.41486	14.4464	0.337135	14.4464	0.404098	14.4464	0.310276	14.4464	0.398954	14.4464	0.310988	14.4464	0.453552
658	14.4685	0.41486	14.4685	0.337135	14.4685	0.404098	14.4685	0.310276	14.4685	0.398954	14.4685	0.310988	14.4685	0.453552
659	14.4905	0.41486	14.4905	0.337135	14.4905	0.404098	14.4905	0.310276	14.4905	0.398954	14.4905	0.310988	14.4905	0.453552
660	14.5125	0.41486	14.5125	0.337135	14.5125	0.404098	14.5125	0.310276	14.5125	0.398954	14.5125	0.310988	14.5125	0.453552
661	14.5345	0.41486	14.5345	0.337135	14.5345	0.404098	14.5345	0.310276	14.5345	0.398954	14.5345	0.310988	14.5345	0.453552
662	14.5566	0.41486	14.5566	0.337135	14.5566	0.404098	14.5566	0.310276	14.5566	0.398954	14.5566	0.310988	14.5566	0.453552
663	14.5786	0.41486	14.5786	0.337135	14.5786	0.404098	14.5786	0.310276	14.5786	0.398954	14.5786	0.310988	14.5786	0.453552
664	14.6006	0.41486	14.6006	0.337135	14.6006	0.404098	14.6006	0.310276	14.6006	0.398954	14.6006	0.310988	14.6006	0.453552
665	14.6226	0.41486	14.6226	0.337135	14.6226	0.404098	14.6226	0.310276	14.6226	0.398954	14.6226	0.310988	14.6226	0.453552
666	14.6446	0.41486	14.6446	0.337135	14.6446	0.404098	14.6446	0.310276	14.6446	0.398954	14.6446	0.310988	14.6446	0.453552
667	14.6667	0.41486	14.6667	0.337135	14.6667	0.404098	14.6667	0.310276	14.6667	0.398954	14.6667	0.310988	14.6667	0.453552
668	14.6887	0.41486	14.6887	0.337135	14.6887	0.404098	14.6887	0.310276	14.6887	0.398954	14.6887	0.310988	14.6887	0.453552
669	14.7107	0.41486	14.7107	0.337135	14.7107	0.404098	14.7107	0.310276	14.7107	0.398954	14.7107	0.310988	14.7107	0.453552
670	14.7327	0.41486	14.7327	0.337135	14.7327	0.404098	14.7327	0.310276	14.7327	0.398954	14.7327	0.310988	14.7327	0.453552
671	14.7548	0.41486	14.7548	0.337135	14.7548	0.404098	14.7548	0.310276	14.7548	0.398954	14.7548	0.310988	14.7548	0.453552
672	14.7768	0.41486	14.7768	0.337135	14.7768	0.404098	14.7768	0.310276	14.7768	0.398954	14.7768	0.310988	14.7768	0.453552
673	14.7988	0.41486	14.7988	0.337135	14.7988	0.404098	14.7988	0.310276	14.7988	0.398954	14.7988	0.310988	14.7988	0.453552
674	14.8208	0.41486	14.8208	0.337135	14.8208	0.404098	14.8208	0.310276	14.8208	0.398954	14.8208	0.310988	14.8208	0.453552
675	14.8428	0.41486	14.8428	0.337135	14.8428	0.404098	14.8428	0.310276	14.8428	0.398954	14.8428	0.310988	14.8428	0.453552
676	14.8649	0.41486	14.8649	0.337135	14.8649	0.404098	14.8649	0.310276	14.8649	0.398954	14.8649	0.310988	14.8649	0.453552
677	14.8869	0.41486	14.8869	0.337135	14.8869	0.404098	14.8869	0.310276	14.8869	0.398954	14.8869	0.310988	14.8869	0.453552
678	14.9089	0.41486	14.9089	0.337135	14.9089	0.404098	14.9089	0.310276	14.9089	0.398954	14.9089	0.310988	14.9089	0.453552
679	14.9309	0.41486	14.9309	0.337135	14.9309	0.404098	14.9309	0.310276	14.9309	0.398954	14.9309	0.310988	14.9309	0.453552
680	14.953	0.41486	14.953	0.337135	14.953	0.404098	14.953	0.310276	14.953	0.398954	14.953	0.310988	14.953	0.453552
681	14.975	0.41486	14.975	0.337135	14.975	0.404098	14.975	0.310276	14.975	0.398954	14.975	0.310988	14.975	0.453552
682	14.997	0.41486	14.997	0.337135	14.997	0.404098	14.997	0.310276	14.997	0.398954	14.997	0.310988	14.997	0.453552
683	15.019	0.41486	15.019	0.337135	15.019	0.404098	15.019	0.310276	15.019	0.398954	15.019	0.310988	15.019	0.453552
684	15.041	0.41486	15.041	0.337135	15.041	0.404098	15.041	0.310276	15.041	0.398954	15.041	0.310988	15.041	0.453552
685	15.0631	0.41486	15.0631	0.337135	15.0631	0.404098	15.0631	0.310276	15.0631	0.398954	15.0631	0.310988	15.0631	0.453552
686	15.0851	0.41486	15.0851	0.337135	15.0851	0.404098	15.0851	0.310276	15.0851	0.398954	15.0851	0.310988	15.0851	0.453552
687	15.1071	0.41486	15.1071	0.337135	15.1071	0.404098	15.1071	0.310276	15.1071	0.398954	15.1071	0.310988	15.1071	0.453552
688	15.1291	0.41486	15.1291	0.337135	15.1291	0.404098	15.1291	0.310276	15.1291	0.398954	15.1291	0.310988	15.1291	0.453552
689	15.1512	0.41486	15.1512	0.337135	15.1512	0.404098	15.1512	0.310276	15.1512	0.398954	15.1512	0.310988	15.1512	0.453552
690	15.1732	0.41486	15.1732	0.337135	15.1732	0.404098	15.1732	0.310276	15.1732	0.398954	15.1732	0.310988	15.1732	0.453552
691	15.1952	0.41486	15.1952	0.337135	15.1952	0.404098	15.1952	0.310276	15.1952	0.398954	15.1952	0.310988	15.1952	0.453552
692	15.2172	0.41486	15.2172	0.337135	15.2172	0.404098	15.2172	0.310276	15.2172	0.398954	15.2172	0.310988	15.2172	0.453552
693	15.2392	0.41486	15.2392	0.337135	15.2392	0.404098	15.2392	0.310276	15.2392	0.398954	15.2392	0.310988	15.2392	0.453552
694	15.2613	0.41486	15.2613	0.337135	15.2613	0.404098	15.2613	0.310276	15.2613	0.398954	15.2613	0.310988	15.2613	0.453552
695	15.2833	0.41486	15.2833	0.337135	15.2833	0.404098	15.2833	0.310276	15.2833	0.398954	15.2833	0.310988	15.2833	0.453552
696	15.3053	0.41486	15.3053	0.337135	15.3053	0.404098	15.3053	0.310276	15.3053	0.398954	15.3053	0.310988	15.3053	0.453552
697	15.3273	0.41486	15.3273	0.337135	15.3273	0.404098	15.3273	0.310276	15.3273	0.398954	15.3273	0.310988	15.3273	0.453552
698	15.3493	0.41486	15.3493	0.337135	15.3493	0.404098	15.3493	0.310276	15.3493	0.398954	15.3493	0.310988	15.3493	0.453552
699	15.3714	0.41486	15.3714	0.337135	15.3714	0.404098	15.3714	0.310276	15.3714	0.398954	15.3714	0.310988	15.3714	0.453552
700	15.3934	0.41486	15.3934	0.337135	15.3934	0.404098	15.3934	0.310276	15.3934	0.398954	15.3934	0.310988	15.3934	0.453552
701	15.4154	0.41486	15.4154	0.337135	15.4154	0.404098	15.4154	0.310276	15.4154	0.398954	15.4154	0.310988	15.4154	0.453552
702	15.4374	0.41486	15.4374	0.337135	15.4374	0.404098	15.4374	0.310276	15.4374	0.398954	15.4374	0.310988	15.4374	0.453552
703	15.4595	0.41486	15.4595	0.337135	15.4595	0.404098	15.4595	0.310276	15.4595	0.398954	15.4595	0.310988	15.4595	0.453552
704	15.4815	0.41486	15.4815	0.337135	15.4815	0.404098	15.4815	0.310276	15.4815	0.398954	15.4815	0.310988	15.4815	0.453552
705	15.5035	0.41486	15.5035	0.337135	15.5035	0.404098	15.5035	0.310276	15.5035	0.398954	15.5035	0.310988	15.5035	0.453552
706	15.5255	0.41486	15.5255	0.337135	15.5255	0.404098	15.5255	0.310276	15.5255	0.398954	15.5255	0.310988	15.5255	0.453552
707	15.5475	0.41486	15.5475	0.337135	15.5475	0.404098	15.5475	0.310276	15.5475	0.398954	15.5475	0.310988	15.5475	0.453552
708	15.5696	0.41486	15.5696	0.337135	15.5696	0.404098	15.5696	0.310276	15.5696	0.398954	15.5696	0.310988	15.5696	0.453552
709	15.5916	0.41486	15.5916	0.337135	15.5916	0.404098	15.5916	0.310276	15.5916	0.398954	15.5916	0.310988	15.5916	0.453552
710	15.6136	0.41486	15.6136	0.337135	15.6136	0.404098	15.6136	0.310276	15.6136	0.398954	15.6136	0.310988	15.6136	0.453552
711	15.6356	0.41486	15.6356	0.337135	15.6356	0.404098	15.6356	0.310276	15.6356	0.398954	15.6356	0.310988	15.6356	0.453552
712	15.6577	0.41486	15.6577	0.337135	15.6577	0.404098	15.6577	0.310276	15.6577	0.398954	15.6577	0.310988	15.6577	0.453552
713	15.6797	0.41486	15.6797	0.337135	15.6797	0.404098	15.6797	0.310276	15.6797	0.398954	15.6797	0.310988	15.6797	0.453552
714	15.7017	0.41486	15.7017	0.337135	15.7017	0.404098	15.7017	0.310276	15.7017	0.398954	15.7017	0.310988	15.7017	0.453552
715	15.7237	0.41486	15.7237	0.337135	15.7237	0.404098	15.7237	0.310276	15.7237	0.398954	15.7237	0.310988	15.7237	0.453552
716	15.7457	0.41486	15.7457	0.337135	15.7457	0.404098	15.7457	0.310276	15.7457	0.398954	15.7457	0.310988	15.7457	0.453552
717	15.7678	0.41486	15.7678	0.337135	15.7678	0.404098	15.7678	0.310276	15.7678	0.398954	15.7678	0.310988	15.7678	0.453552
718	15.7898	0.41486	15.7898	0.337135	15.7898	0.404098	15.7898	0.310276	15.7898	0.398954	15.7898	0.310988	15.7898	0.453552
719	15.8118	0.41486	15.8118	0.337135	15.8118	0.404098	15.8118	0.310276	15.8118	0.398954	15.8118	0.310988	15.8118	0.453552
720	15.8338	0.41486	15.8338	0.337135	15.8338	0.404098	15.8338	0.310276	15.8338	0.398954	15.8338	0.310988	15.8338	0.453552
721	15.8559	0.41486	15.8559	0.337135	15.8559	0.404098	15.8559	0.310276	15.8559	0.398954	15.8559	0.310988	15.8559	0.453552
722	15.8779	0.41486	15.8779	0.337135	15.8779	0.404098	15.8779	0.310276	15.8779	0.398954	15.8779	0.310988	15.8779	0.453552
723	15.8999	0.41486	15.8999	0.337135	15.8999	0.404098	15.8999	0.310276	15.8999	0.398954	15.8999	0.310988	15.8999	0.453552
724	15.9219	0.41486	15.9219	0.337135	15.9219	0.404098	15.9219	0.310276	15.9219	0.398954	15.9219	0.310988	15.9219	0.453552
725	15.9439	0.41486	15.9439	0.337135	15.9439	0.404098	15.9439	0.310276	15.9439	0.398954	15.9439	0.310988	15.9439	0.453552
726	15.966	0.41486	15.966	0.337135	15.966	0.404098	15.966	0.310276	15.966	0.398954	15.966	0.310988	15.966	0.453552
727	15.988	0.41486	15.988	0.337135	15.988	0.404098	15.988	0.310276	15.988	0.398954	15.988	0.310988	15.988	0.453552
728	16.01	0.41486	16.01	0.337135	16.01	0.404098	16.01	0.310276	16.01	0.398954	16.01	0.310988	16.01	0.453552
729	16.032	0.41486	16.032	0.337135	16.032	0.404098	16.032	0.310276	16.032	0.398954	16.032	0.310988	16.032	0.453552
730	16.0541	0.41486	16.0541	0.337135	16.0541	0.404098	16.0541	0.310276	16.0541	0.398954	16.0541	0.310988	16.0541	0.453552
731	16.0761	0.41486	16.0761	0.337135	16.0761	0.404098	16.0761	0.310276	16.0761	0.398954	16.0761	0.310988	16.0761	0.453552
732	16.0981	0.41486	16.0981	0.337135	16.0981	0.404098	16.0981	0.310276	16.0981	0.398954	16.0981	0.310988	16.0981	0.453552
733	16.1201	0.41486	16.1201	0.337135	16.1201	0.404098	16.1201	0.310276	16.1201	0.398954	16.1201	0.310988	16.1201	0.453552
734	16.1421	0.41486	16.1421	0.337135	16.1421	0.404098	16.1421	0.310276	16.1421	0.398954	16.1421	0.310988	16.1421	0.453552
735	16.1642	0.41486	16.1642	0.337135	16.1642	0.404098	16.1642	0.310276	16.1642	0.398954	16.1642	0.310988	16.1642	0.453552
736	16.1862	0.41486	16.1862	0.337135	16.1862	0.404098	16.1862	0.310276	16.1862	0.398954	16.1862	0.310988	16.1862	0.453552
737	16.2082	0.41486	16.2082	0.337135	16.2082	0.404098	16.2082	0.310276	16.2082	0.398954	16.2082	0.310988	16.2082	0.453552
738	16.2302	0.41486	16.2302	0.337135	16.2302	0.404098	16.2302	0.310276	16.2302	0.398954	16.2302	0.310988	16.2302	0.453552
739	16.2523	0.41486	16.2523	0.337135	16.2523	0.404098	16.2523	0.310276	16.2523	0.398954	16.2523	0.310988	16.2523	0.453552
740	16.2743	0.41486	16.2743	0.337135	16.2743	0.404098	16.2743	0.310276	16.2743	0.398954	16.2743	0.310988	16.2743	0.453552
741	16.2963	0.41486	16.2963	0.337135	16.2963	0.404098	16.2963	0.310276	16.2963	0.398954	16.2963	0.310988	16.2963	0.453552
742	16.3183	0.41486	16.3183	0.337135	16.3183	0.404098	16.3183	0.310276	16.3183	0.398954	16.3183	0.310988	16.3183	0.453552
743	16.3403	0.41486	16.3403	0.337135	16.3403	0.404098	16.3403	0.310276	16.3403	0.398954	16.3403	0.310988	16.3403	0.453552
744	16.3624	0.41486	16.3624	0.337135	16.3624	0.404098	16.3624	0.310276	16.3624	0.398954	16.3624	0.310988	16.3624	0.453552
745	16.3844	0.41486	16.3844	0.337135	16.3844	0.404098	16.3844	0.310276	16.3844	0.398954	16.3844	0.310988	16.3844	0.453552
746	16.4064	0.41486	16.4064	0.337135	16.4064	0.404098	16.4064	0.310276	16.4064	0.398954	16.4064	0.310988	16.4064	0.453552
747	16.4284	0.41486	16.4284	0.337135	16.4284	0.404098	16.4284	0.310276	16.4284	0.398954	16.4284	0.310988	16.4284	0.453552
748	16.4505	0.41486	16.4505	0.337135	16.4505	0.404098	16.4505	0.310276	16.4505	0.398954	16.4505	0.310988	16.4505	0.453552
749	16.4725	0.41486	16.4725	0.337135	16.4725	0.404098	16.4725	0.310276	16.4725	0.398954	16.4725	0.310988	16.4725	0.453552
750	16.4945	0.41486	16.4945	0.337135	16.4945	0.404098	16.4945	0.310276	16.4945	0.398954	16.4945	0.310988	16.4945	0.453552
751	16.5165	0.41486	16.5165	0.337135	16.5165	0.404098	16.5165	0.310276	16.5165	0.398954	16.5165	0.310988	16.5165	0.453552
752	16.5385	0.41486	16.5385	0.337135	16.5385	0.404098	16.5385	0.310276	16.5385	0.398954	16.5385	0.310988	16.5385	0.453552
753	16.5606	0.41486	16.5606	0.337135	16.5606	0.404098	16.5606	0.310276	16.5606	0.398954	16.5606	0.310988	16.5606	0.453552
754	16.5826	0.41486	16.5826	0.337135	16.5826	0.404098	16.5826	0.310276	16.5826	0.398954	16.5826	0.310988	16.5826	0.453552
755	16.6046	0.41486	16.6046	0.337135	16.6046	0.404098	16.6046	0.310276	16.6046	0.398954	16.6046	0.310988	16.6046	0.453552
756	16.6266	0.41486	16.6266	0.337135	16.6266	0.404098	16.6266	0.310276	16.6266	0.398954	16.6266	0.310988	16.6266	0.453552
757	16.6486	0.41486	16.6486	0.337135	16.6486	0.404098	16.6486	0.310276	16.6486	0.398954	16.6486	0.310988	16.6486	0.453552
758	16.6707	0.41486	16.6707	0.337135	16.6707	0.404098	16.6707	0.310276	16.6707	0.398954	16.6707	0.310988	16.6707	0.453552
759	16.6927	0.41486	16.6927	0.337135	16.6927	0.404098	16.6927	0.310276	16.6927	0.398954	16.6927	0.310988	16.6927	0.453552
760	16.7147	0.41486	16.7147	0.337135	16.7147	0.404098	16.7147	0.310276	16.7147	0.398954	16.7147	0.310988	16.7147	0.453552
761	16.7367	0.41486	16.7367	0.337135	16.7367	0.404098	16.7367	0.310276	16.7367	0.398954	16.7367	0.310988	16.7367	0.453552
762	16.7588	0.41486	16.7588	0.337135	16.7588	0.404098	16.7588	0.310276	16.7588	0.398954	16.7588	0.310988	16.7588	0.453552
763	16.7808	0.41486	16.7808	0.337135	16.7808	0.404098	16.7808	0.310276	16.7808	0.398954	16.7808	0.310988	16.7808	0.453552
764	16.8028	0.41486	16.8028	0.337135	16.8028	0.404098	16.8028	0.310276	16.8028	0.398954	16.8028	0.310988	16.8028	0.453552
765	16.8248	0.41486	16.8248	0.337135	16.8248	0.404098	16.8248	0.310276	16.8248	0.398954	16.8248	0.310988	16.8248	0.453552
766	16.8468	0.41486	16.8468	0.337135	16.8468	0.404098	16.8468	0.310276	16.8468	0.398954	16.8468	0.310988	16.8468	0.453552
767	16.8689	0.41486	16.8689	0.337135	16.8689	0.404098	16.8689	0.310276	16.8689	0.398954	16.8689	0.310988	16.8689	0.453552
768	16.8909	0.41486	16.8909	0.337135	16.8909	0.404098	16.8909	0.310276	16.8909	0.398954	16.8909	0.310988	16.8909	0.453552
769	16.9129	0.41486	16.9129	0.337135	16.9129	0.404098	16.9129	0.310276	16.9129	0.398954	16.9129	0.310988	16.9129	0.453552
770	16.9349	0.41486	16.9349	0.337135	16.9349	0.404098	16.9349	0.310276	16.9349	0.398954	16.9349	0.310988	16.9349	0.453552
771	16.957	0.41486	16.957	0.337135	16.957	0.404098	16.957	0.310276	16.957	0.398954	16.957	0.310988	16.957	0.453552
772	16.979	0.41486	16.979	0.337135	16.979	0.404098	16.979	0.310276	16.979	0.398954	16.979	0.310988	16.979	0.453552
773	17.001	0.41486	17.001	0.337135	17.001	0.404098	17.001	0.310276	17.001	0.398954	17.001	0.310988	17.001	0.453552
774	17.023	0.41486	17.023	0.337135	17.023	0.404098	17.023	0.310276	17.023	0.398954	17.023	0.310988	17.023	0.453552
775	17.045	0.41486	17.045	0.337135	17.045	0.404098	17.045	0.310276	17.045	0.398954	17.045	0.310988	17.045	0.453552
776	17.0671	0.41486	17.0671	0.337135	17.0671	0.404098	17.0671	0.310276	17.0671	0.398954	17.0671	0.310988	17.0671	0.453552
777	17.0891	0.41486	17.0891	0.337135	17.0891	0.404098	17.0891	0.310276	17.0891	0.398954	17.0891	0.310988	17.0891	0.453552
778	17.1111	0.41486	17.1111	0.337135	17.1111	0.404098	17.1111	0.310276	17.1111	0.398954	17.1111	0.310988	17.1111	0.453552
779	17.1331	0.41486	17.1331	0.337135	17.1331	0.404098	17.1331	0.310276	17.1331	0.398954	17.1331	0.310988	17.1331	0.453552
780	17.1552	0.41486	17.1552	0.337135	17.1552	0.404098	17.1552	0.310276	17.1552	0.398954	17.1552	0.310988	17.1552	0.453552
781	17.1772	0.41486	17.1772	0.337135	17.1772	0.404098	17.1772	0.310276	17.1772	0.398954	17.1772	0.310988	17.1772	0.453552
782	17.1992	0.41486	17.1992	0.337135	17.1992	0.404098	17.1992	0.310276	17.1992	0.398954	17.1992	0.310988	17.1992	0.453552
783	17.2212	0.41486	17.2212	0.337135	17.2212	0.404098	17.2212	0.310276	17.2212	0.398954	17.2212	0.310988	17.2212	0.453552
784	17.2432	0.41486	17.2432	0.337135	17.2432	0.404098	17.2432	0.310276	17.2432	0.398954	17.2432	0.310988	17.2432	0.453552
785	17.2653	0.41486	17.2653	0.337135	17.2653	0.404098	17.2653	0.310276	17.2653	0.398954	17.2653	0.310988	17.2653	0.453552
786	17.2873	0.41486	17.2873	0.337135	17.2873	0.404098	17.2873	0.310276	17.2873	0.398954	17.2873	0.310988	17.2873	0.453552
787	17.3093	0.41486	17.3093	0.337135	17.3093	0.404098	17.3093	0.310276	17.3093	0.398954	17.3093	0.310988	17.3093	0.453552
788	17.3313	0.41486	17.3313	0.337135	17.3313	0.404098	17.3313	0.310276	17.3313	0.398954	17.3313	0.310988	17.3313	0.453552
789	17.3534	0.41486	17.3534	0.337135	17.3534	0.404098	17.3534	0.310276	17.3534	0.398954	17.3534	0.310988	17.3534	0.453552
790	17.3754	0.41486	17.3754	0.337135	17.3754	0.404098	17.3754	0.310276	17.3754	0.398954	17.3754	0.310988	17.3754	0.453552
791	17.3974	0.41486	17.3974	0.337135	17.3974	0.404098	17.3974	0.310276	17.3974	0.398954	17.3974	0.310988	17.3974	0.453552
792	17.4194	0.41486	17.4194	0.337135	17.4194	0.404098	17.4194	0.310276	17.4194	0.398954	17.4194	0.310988	17.4194	0.453552
793	17.4414	0.41486	17.4414	0.337135	17.4414	0.404098	17.4414	0.310276	17.4414	0.398954	17.4414	0.310988	17.4414	0.453552
794	17.4635	0.41486	17.4635	0.337135	17.4635	0.404098	17.4635	0.310276	17.4635	0.398954	17.4635	0.310988	17.4635	0.453552
795	17.4855	0.41486	17.4855	0.337135	17.4855	0.404098	17.4855	0.310276	17.4855	0.398954	17.4855	0.310988	17.4855	0.453552
796	17.5075	0.41486	17.5075	0.337135	17.5075	0.404098	17.5075	0.310276	17.5075	0.398954	17.5075	0.310988	17.5075	0.453552
797	17.5295	0.41486	17.5295	0.337135	17.5295	0.404098	17.5295	0.310276	17.5295	0.398954	17.5295	0.310988	17.5295	0.453552
798	17.5516	0.41486	17.5516	0.337135	17.5516	0.404098	17.5516	0.310276	17.5516	0.398954	17.5516	0.310988	17.5516	0.453552
799	17.5736	0.41486	17.5736	0.337135	17.5736	0.404098	17.5736	0.310276	17.5736	0.398954	17.5736	0.310988	17.5736	0.453552
800	17.5956	0.41486	17.5956	0.337135	17.5956	0.404098	17.5956	0.310276	17.5956	0.398954	17.5956	0.310988	17.5956	0.453552
801	17.6176	0.41486	17.6176	0.337135	17.6176	0.404098	17.6176	0.310276	17.6176	0.398954	17.6176	0.310988	17.6176	0.453552
802	17.6396	0.41486	17.6396	0.337135	17.6396	0.404098	17.6396	0.310276	17.6396	0.398954	17.6396	0.310988	17.6396	0.453552
803	17.6617	0.41486	17.6617	0.337135	17.6617	0.404098	17.6617	0.310276	17.6617	0.398954	17.6617	0.310988	17.6617	0.453552
804	17.6837	0.41486	17.6837	0.337135	17.6837	0.404098	17.6837	0.310276	17.6837	0.398954	17.6837	0.310988	17.6837	0.453552
805	17.7057	0.41486	17.7057	0.337135	17.7057	0.404098	17.7057	0.310276	17.7057	0.398954	17.7057	0.310988	17.7057	0.453552
806	17.7277	0.41486	17.7277	0.337135	17.7277	0.404098	17.7277	0.310276	17.7277	0.398954	17.7277	0.310988	17.7277	0.453552
807	17.7497	0.41486	17.7497	0.337135	17.7497	0.404098	17.7497	0.310276	17.7497	0.398954	17.7497	0.310988	17.7497	0.453552
808	17.7718	0.41486	17.7718	0.337135	17.7718	0.404098	17.7718	0.310276	17.7718	0.398954	17.7718	0.310988	17.7718	0.453552
809	17.7938	0.41486	17.7938	0.337135	17.7938	0.404098	17.7938	0.310276	17.7938	0.398954	17.7938	0.310988	17.7938	0.453552
810	17.8158	0.41486	17.8158	0.337135	17.8158	0.404098	17.8158	0.310276	17.8158	0.398954	17.8158	0.310988	17.8158	0.453552
811	17.8378	0.41486	17.8378	0.337135	17.8378	0.404098	17.8378	0.310276	17.8378	0.398954	17.8378	0.310988	17.8378	0.453552
812	17.8599	0.41486	17.8599	0.337135	17.8599	0.404098	17.8599	0.310276	17.8599	0.398954	17.8599	0.310988	17.8599	0.453552
813	17.8819	0.41486	17.8819	0.337135	17.8819	0.404098	17.8819	0.310276	17.8819	0.398954	17.8819	0.310988	17.8819	0.453552
814	17.9039	0.41486	17.9039	0.337135	17.9039	0.404098	17.9039	0.310276	17.9039	0.398954	17.9039	0.310988	17.9039	0.453552
815	17.9259	0.41486	17.9259	0.337135	17.9259	0.404098	17.9259	0.310276	17.9259	0.398954	17.9259	0.310988	17.9259	0.453552
816	17.9479	0.41486	17.9479	0.337135	17.9479	0.404098	17.9479	0.310276	17.9479	0.398954	17.9479	0.310988	17.9479	0.453552
817	17.97	0.41486	17.97	0.337135	17.97	0.404098	17.97	0.310276	17.97	0.398954	17.97	0.310988	17.97	0.453552
818	17.992	0.41486	17.992	0.337135	17.992	0.404098	17.992	0.310276	17.992	0.398954	17.992	0.310988	17.992	0.453552
819	18.014	0.41486	18.014	0.337135	18.014	0.404098	18.014	0.310276	18.014	0.398954	18.014	0.310988	18.014	0.453552
820	18.036	0.41486	18.036	0.337135	18.036	0.404098	18.036	0.310276	18.036	0.398954	18.036	0.310988	18.036	0.453552
821	18.0581	0.41486	18.0581	0.337135	18.0581	0.404098	18.0581	0.310276	18.0581	0.398954	18.0581	0.310988	18.0581	0.453552
822	18.0801	0.41486	18.0801	0.337135	18.0801	0.404098	18.0801	0.310276	18.0801	0.398954	18.0801	0.310988	18.0801	0.453552
823	18.1021	0.41486	18.1021	0.337135	18.1021	0.404098	18.1021	0.310276	18.1021	0.398954	18.1021	0.310988	18.1021	0.453552
824	18.1241	0.41486	18.1241	0.337135	18.1241	0.404098	18.1241	0.310276	18.1241	0.398954	18.1241	0.310988	18.1241	0.453552
825	18.1461	0.41486	18.1461	0.337135	18.1461	0.404098	18.1461	0.310276	18.1461	0.398954	18.1461	0.310988	18.1461	0.453552
826	18.1682	0.41486	18.1682	0.337135	18.1682	0.404098	18.1682	0.310276	18.1682	0.398954	18.1682	0.310988	18.1682	0.453552
827	18.1902	0.41486	18.1902	0.337135	18.1902	0.404098	18.1902	0.310276	18.1902	0.398954	18.1902	0.310988	18.1902	0.453552
828	18.2122	0.41486	18.2122	0.337135	18.2122	0.404098	18.2122	0.310276	18.2122	0.398954	18.2122	0.310988	18.2122	0.453552
829	18.2342	0.41486	18.2342	0.337135	18.2342	0.404098	18.2342	0.310276	18.2342	0.398954	18.2342	0.310988	18.2342	0.453552
830	18.2563	0.41486	18.2563	0.337135	18.2563	0.404098	18.2563	0.310276	18.2563	0.398954	18.2563	0.310988	18.2563	0.453552
831	18.2783	0.41486	18.2783	0.337135	18.2783	0.404098	18.2783	0.310276	18.2783	0.398954	18.2783	0.310988	18.2783	0.453552
832	18.3003	0.41486	18.3003	0.337135	18.3003	0.404098	18.3003	0.310276	18.3003	0.398954	18.3003	0.310988	18.3003	0.453552
833	18.3223	0.41486	18.3223	0.337135	18.3223	0.404098	18.3223	0.310276	18.3223	0.398954	18.3223	0.310988	18.3223	0.453552
834	18.3443	0.41486	18.3443	0.337135	18.3443	0.404098	18.3443	0.310276	18.3443	0.398954	18.3443	0.310988	18.3443	0.453552
835	18.3664	0.41486	18.3664	0.337135	18.3664	0.404098	18.3664	0.310276	18.3664	0.398954	18.3664	0.310988	18.3664	0.453552
836	18.3884	0.41486	18.3884	0.337135	18.3884	0.404098	18.3884	0.310276	18.3884	0.398954	18.3884	0.310988	18.3884	0.453552
837	18.4104	0.41486	18.4104	0.337135	18.4104	0.404098	18.4104	0.310276	18.4104	0.398954	18.4104	0.310988	18.4104	0.453552
838	18.4324	0.41486	18.4324	0.337135	18.4324	0.404098	18.4324	0.310276	18.4324	0.398954	18.4324	0.310988	18.4324	0.453552
839	18.4545	0.41486	18.4545	0.337135	18.4545	0.404098	18.4545	0.310276	18.4545	0.398954	18.4545	0.310988	18.4545	0.453552
840	18.4765	0.41486	18.4765	0.337135	18.4765	0.404098	18.4765	0.310276	18.4765	0.398954	18.4765	0.310988	18.4765	0.453552
841	18.4985	0.41486	18.4985	0.337135	18.4985	0.404098	18.4985	0.310276	18.4985	0.398954	18.4985	0.310988	18.4985	0.453552
842	18.5205	0.41486	18.5205	0.337135	18.5205	0.404098	18.5205	0.310276	18.5205	0.398954	18.5205	0.310988	18.5205	0.453552
843	18.5425	0.41486	18.5425	0.337135	18.5425	0.404098	18.5425	0.310276	18.5425	0.398954	18.5425	0.310988	18.5425	0.453552
844	18.5646	0.41486	18.5646	0.337135	18.5646	0.404098	18.5646	0.310276	18.5646	0.398954	18.5646	0.310988	18.5646	0.453552
845	18.5866	0.41486	18.5866	0.337135	18.5866	0.404098	18.5866	0.310276	18.5866	0.398954	18.5866	0.310988	18.5866	0.453552
846	18.6086	0.41486	18.6086	0.337135	18.6086	0.404098	18.6086	0.310276	18.6086	0.398954	18.6086	0.310988	18.6086	0.453552
847	18.6306	0.41486	18.6306	0.337135	18.6306	0.404098	18.6306	0.310276	18.6306	0.398954	18.6306	0.310988	18.6306	0.453552
848	18.6527	0.41486	18.6527	0.337135	18.6527	0.404098	18.6527	0.310276	18.6527	0.398954	18.6527	0.310988	18.6527	0.453552
849	18.6747	0.41486	18.6747	0.337135	18.6747	0.404098	18.6747	0.310276	18.6747	0.398954	18.6747	0.310988	18.6747	0.453552
850	18.6967	0.41486	18.6967	0.337135	18.6967	0.404098	18.6967	0.310276	18.6967	0.398954	18.6967	0.310988	18.6967	0.453552
851	18.7187	0.41486	18.7187	0.337135	18.7187	0.404098	18.7187	0.310276	18.7187	0.398954	18.7187	0.310988	18.7187	0.453552
852	18.7407	0.41486	18.7407	0.337135	18.7407	0.404098	18.7407	0.310276	18.7407	0.398954	18.7407	0.310988	18.7407	0.453552
853	18.7628	0.41486	18.7628	0.337135	18.7628	0.404098	18.7628	0.310276	18.7628	0.398954	18.7628	0.310988	18.7628	0.453552
854	18.7848	0.41486	18.7848	0.337135	18.7848	0.404098	18.7848	0.310276	18.7848	0.398954	18.7848	0.310988	18.7848	0.453552
855	18.8068	0.41486	18.8068	0.337135	18.8068	0.404098	18.8068	0.310276	18.8068	0.398954	18.8068	0.310988	18.8068	0.453552
856	18.8288	0.41486	18.8288	0.337135	18.8288	0.404098	18.8288	0.310276	18.8288	0.398954	18.8288	0.310988	18.8288	0.453552
857	18.8509	0.41486	18.8509	0.337135	18.8509	0.404098	18.8509	0.310276	18.8509	0.398954	18.8509	0.310988	18.8509	0.453552
858	18.8729	0.41486	18.8729	0.337135	18.8729	0.404098	18.8729	0.310276	18.8729	0.398954	18.8729	0.310988	18.8729	0.453552
859	18.8949	0.41486	18.8949	0.337135	18.8949	0.404098	18.8949	0.310276	18.8949	0.398954	18.8949	0.310988	18.8949	0.453552
860	18.9169	0.41486	18.9169	0.337135	18.9169	0.404098	18.9169	0.310276	18.9169	0.398954	18.9169	0.310988	18.9169	0.453552
861	18.9389	0.41486	18.9389	0.337135	18.9389	0.404098	18.9389	0.310276	18.9389	0.398954	18.9389	0.310988	18.9389	0.453552
862	18.961	0.41486	18.961	0.337135	18.961	0.404098	18.961	0.310276	18.961	0.398954	18.961	0.310988	18.961	0.453552
863	18.983	0.41486	18.983	0.337135	18.983	0.404098	18.983	0.310276	18.983	0.398954	18.983	0.310988	18.983	0.453552
864	19.005	0.41486	19.005	0.337135	19.005	0.404098	19.005	0.310276	19.005	0.398954	19.005	0.310988	19.005	0.453552
865	19.027	0.41486	19.027	0.337135	19.027	0.404098	19.027	0.310276	19.027	0.398954	19.027	0.310988	19.027	0.453552
866	19.049	0.41486	19.049	0.337135	19.049	0.404098	19.049	0.310276	19.049	0.398954	19.049	0.310988	19.049	0.453552
867	19.0711	0.41486	19.0711	0.337135	19.0711	0.404098	19.0711	0.310276	19.0711	0.398954	19.0711	0.310988	19.0711	0.453552
868	19.0931	0.41486	19.0931	0.337135	19.0931	0.404098	19.0931	0.310276	19.0931	0.398954	19.0931	0.310988	19.0931	0.453552
869	19.1151	0.41486	19.1151	0.337135	19.1151	0.404098	19.1151	0.310276	19.1151	0.398954	19.1151	0.310988	19.1151	0.453552
870	19.1371	0.41486	19.1371	0.337135	19.1371	0.404098	19.1371	0.310276	19.1371	0.398954	19.1371	0.310988	19.1371	0.453552
871	19.1592	0.41486	19.1592	0.337135	19.1592	0.404098	19.1592	0.310276	19.1592	0.398954	19.1592	0.310988	19.1592	0.453552
872	19.1812	0.41486	19.1812	0.337135	19.1812	0.404098	19.1812	0.310276	19.1812	0.398954	19.1812	0.310988	19.1812	0.453552
873	19.2032	0.41486	19.2032	0.337135	19.2032	0.404098	19.2032	0.310276	19.2032	0.398954	19.2032	0.310988	19.2032	0.453552
874	19.2252	0.41486	19.2252	0.337135	19.2252	0.404098	19.2252	0.310276	19.2252	0.398954	19.2252	0.310988	19.2252	0.453552
875	19.2472	0.41486	19.2472	0.337135	19.2472	0.404098	19.2472	0.310276	19.2472	0.398954	19.2472	0.310988	19.2472	0.453552
876	19.2693	0.41486	19.2693	0.337135	19.2693	0.404098	19.2693	0.310276	19.2693	0.398954	19.2693	0.310988	19.2693	0.453552
877	19.2913	0.41486	19.2913	0.337135	19.2913	0.404098	19.2913	0.310276	19.2913	0.398954	19.2913	0.310988	19.2913	0.453552
878	19.3133	0.41486	19.3133	0.337135	19.3133	0.404098	19.3133	0.310276	19.3133	0.398954	19.3133	0.310988	19.3133	0.453552
879	19.3353	0.41486	19.3353	0.337135	19.3353	0.404098	19.3353	0.310276	19.3353	0.398954	19.3353	0.310988	19.3353	0.453552
880	19.3574	0.41486	19.3574	0.337135	19.3574	0.404098	19.3574	0.310276	19.3574	0.398954	19.3574	0.310988	19.3574	0.453552
881	19.3794	0.41486	19.3794	0.337135	19.3794	0.404098	19.3794	0.310276	19.3794	0.398954	19.3794	0.310988	19.3794	0.453552
882	19.4014	0.41486	19.4014	0.337135	19.4014	0.404098	19.4014	0.310276	19.4014	0.398954	19.4014	0.310988	19.4014	0.453552
883	19.4234	0.41486	19.4234	0.337135	19.4234	0.404098	19.4234	0.310276	19.4234	0.398954	19.4234	0.310988	19.4234	0.453552
884	19.4454	0.41486	19.4454	0.337135	19.4454	0.404098	19.4454	0.310276	19.4454	0.398954	19.4454	0.310988	19.4454	0.453552
885	19.4675	0.41486	19.4675	0.337135	19.4675	0.404098	19.4675	0.310276	19.4675	0.398954	19.4675	0.310988	19.4675	0.453552
886	19.4895	0.41486	19.4895	0.337135	19.4895	0.404098	19.4895	0.310276	19.4895	0.398954	19.4895	0.310988	19.4895	0.453552
887	19.5115	0.41486	19.5115	0.337135	19.5115	0.404098	19.5115	0.310276	19.5115	0.398954	19.5115	0.310988	19.5115	0.453552
888	19.5335	0.41486	19.5335	0.337135	19.5335	0.404098	19.5335	0.310276	19.5335	0.398954	19.5335	0.310988	19.5335	0.453552
889	19.5556	0.41486	19.5556	0.337135	19.5556	0.404098	19.5556	0.310276	19.5556	0.398954	19.5556	0.310988	19.5556	0.453552
890	19.5776	0.41486	19.5776	0.337135	19.5776	0.404098	19.5776	0.310276	19.5776	0.398954	19.5776	0.310988	19.5776	0.453552
891	19.5996	0.41486	19.5996	0.337135	19.5996	0.404098	19.5996	0.310276	19.5996	0.398954	19.5996	0.310988	19.5996	0.453552
892	19.6216	0.41486	19.6216	0.337135	19.6216	0.404098	19.6216	0.310276	19.6216	0.398954	19.6216	0.310988	19.6216	0.453552
893	19.6436	0.41486	19.6436	0.337135	19.6436	0.404098	19.6436	0.310276	19.6436	0.398954	19.6436	0.310988	19.6436	0.453552
894	19.6657	0.41486	19.6657	0.337135	19.6657	0.404098	19.6657	0.310276	19.6657	0.398954	19.6657	0.310988	19.6657	0.453552
895	19.6877	0.41486	19.6877	0.337135	19.6877	0.404098	19.6877	0.310276	19.6877	0.398954	19.6877	0.310988	19.6877	0.453552
896	19.7097	0.41486	19.7097	0.337135	19.7097	0.404098	19.7097	0.310276	19.7097	0.398954	19.7097	0.310988	19.7097	0.453552
897	19.7317	0.41486	19.7317	0.337135	19.7317	0.404098	19.7317	0.310276	19.7317	0.398954	19.7317	0.310988	19.7317	0.453552
898	19.7538	0.41486	19.7538	0.337135	19.7538	0.404098	19.7538	0.310276	19.7538	0.398954	19.7538	0.310988	19.7538	0.453552
899	19.7758	0.41486	19.7758	0.337135	19.7758	0.404098	19.7758	0.310276	19.7758	0.398954	19.7758	0.310988	19.7758	0.453552
900	19.7978	0.41486	19.7978	0.337135	19.7978	0.404098	19.7978	0.310276	19.7978	0.398954	19.7978	0.310988	19.7978	0.453552
901	19.8198	0.41486	19.8198	0.337135	19.8198	0.404098	19.8198	0.310276	19.8198	0.398954	19.8198	0.310988	19.8198	0.453552
902	19.8418	0.41486	19.8418	0.337135	19.8418	0.404098	19.8418	0.310276	19.8418	0.398954	19.8418	0.310988	19.8418	0.453552
903	19.8639	0.41486	19.8639	0.337135	19.8639	0.404098	19.8639	0.310276	19.8639	0.398954	19.8639	0.310988	19.8639	0.453552
904	19.8859	0.41486	19.8859	0.337135	19.8859	0.404098	19.8859	0.310276	19.8859	0.398954	19.8859	0.310988	19.8859	0.453552
905	19.9079	0.41486	19.9079	0.337135	19.9079	0.404098	19.9079	0.310276	19.9079	0.398954	19.9079	0.310988	19.9079	0.453552
906	19.9299	0.41486	19.9299	0.337135	19.9299	0.404098	19.9299	0.310276	19.9299	0.398954	19.9299	0.310988	19.9299	0.453552
907	19.952	0.41486	19.952	0.337135	19.952	0.404098	19.952	0.310276	19.952	0.398954	19.952	0.310988	19.952	0.453552
908	19.974	0.41486	19.974	0.337135	19.974	0.404098	19.974	0.310276	19.974	0.398954	19.974	0.310988	19.974	0.453552
909	19.996	0.41486	19.996	0.337135	19.996	0.404098	19.996	0.310276	19.996	0.398954	19.996	0.310988	19.996	0.453552
910	20.018	0.41486	20.018	0.337135	20.018	0.404098	20.018	0.310276	20.018	0.398954	20.018	0.310988	20.018	0.453552
911	20.04	0.41486	20.04	0.337135	20.04	0.404098	20.04	0.310276	20.04	0.398954	20.04	0.310988	20.04	0.453552
912	20.0621	0.41486	20.0621	0.337135	20.0621	0.404098	20.0621	0.310276	20.0621	0.398954	20.0621	0.310988	20.0621	0.453552
913	20.0841	0.41486	20.0841	0.337135	20.0841	0.404098	20.0841	0.310276	20.0841	0.398954	20.0841	0.310988	20.0841	0.453552
914	20.1061	0.41486	20.1061	0.337135	20.1061	0.404098	20.1061	0.310276	20.1061	0.398954	20.1061	0.310988	20.1061	0.453552
915	20.1281	0.41486	20.1281	0.337135	20.1281	0.404098	20.1281	0.310276	20.1281	0.398954	20.1281	0.310988	20.1281	0.453552
916	20.1502	0.41486	20.1502	0.337135	20.1502	0.404098	20.1502	0.310276	20.1502	0.398954	20.1502	0.310988	20.1502	0.453552
917	20.1722	0.41486	20.1722	0.337135	20.1722	0.404098	20.1722	0.310276	20.1722	0.398954	20.1722	0.310988	20.1722	0.453552
918	20.1942	0.41486	20.1942	0.337135	20.1942	0.404098	20.1942	0.310276	20.1942	0.398954	20.1942	0.310988	20.1942	0.453552
919	20.2162	0.41486	20.2162	0.337135	20.2162	0.404098	20.2162	0.310276	20.2162	0.398954	20.2162	0.310988	20.2162	0.453552
920	20.2382	0.41486	20.2382	0.337135	20.2382	0.404098	20.2382	0.310276	20.2382	0.398954	20.2382	0.310988	20.2382	0.453552
921	20.2603	0.41486	20.2603	0.337135	20.2603	0.404098	20.2603	0.310276	20.2603	0.398954	20.2603	0.310988	20.2603	0.453552
922	20.2823	0.41486	20.2823	0.337135	20.2823	0.404098	20.2823	0.310276	20.2823	0.398954	20.2823	0.310988	20.2823	0.453552
923	20.3043	0.41486	20.3043	0.337135	20.3043	0.404098	20.3043	0.310276	20.3043	0.398954	20.3043	0.310988	20.3043	0.453552
924	20.3263	0.41486	20.3263	0.337135	20.3263	0.404098	20.3263	0.310276	20.3263	0.398954	20.3263	0.310988	20.3263	0.453552
925	20.3483	0.41486	20.3483	0.337135	20.3483	0.404098	20.3483	0.310276	20.3483	0.398954	20.3483	0.310988	20.3483	0.453552
926	20.3704	0.41486	20.3704	0.337135	20.3704	0.404098	20.3704	0.310276	20.3704	0.398954	20.3704	0.310988	20.3704	0.453552
927	20.3924	0.41486	20.3924	0.337135	20.3924	0.404098	20.3924	0.310276	20.3924	0.398954	20.3924	0.310988	20.3924	0.453552
928	20.4144	0.41486	20.4144	0.337135	20.4144	0.404098	20.4144	0.310276	20.4144	0.398954	20.4144	0.310988	20.4144	0.453552
929	20.4364	0.41486	20.4364	0.337135	20.4364	0.404098	20.4364	0.310276	20.4364	0.398954	20.4364	0.310988	20.4364	0.453552
930	20.4585	0.41486	20.4585	0.337135	20.4585	0.404098	20.4585	0.310276	20.4585	0.398954	20.4585	0.310988	20.4585	0.453552
931	20.4805	0.41486	20.4805	0.337135	20.4805	0.404098	20.4805	0.310276	20.4805	0.398954	20.4805	0.310988	20.4805	0.453552
932	20.5025	0.41486	20.5025	0.337135	20.5025	0.404098	20.5025	0.310276	20.5025	0.398954	20.5025	0.310988	20.5025	0.453552
933	20.5245	0.41486	20.5245	0.337135	20.5245	0.404098	20.5245	0.310276	20.5245	0.398954	20.5245	0.310988	20.5245	0.453552
934	20.5465	0.41486	20.5465	0.337135	20.5465	0.404098	20.5465	0.310276	20.5465	0.398954	20.5465	0.310988	20.5465	0.453552
935	20.5686	0.41486	20.5686	0.337135	20.5686	0.404098	20.5686	0.310276	20.5686	0.398954	20.5686	0.310988	20.5686	0.453552
936	20.5906	0.41486	20.5906	0.337135	20.5906	0.404098	20.5906	0.310276	20.5906	0.398954	20.5906	0.310988	20.5906	0.453552
937	20.6126	0.41486	20.6126	0.337135	20.6126	0.404098	20.6126	0.310276	20.6126	0.398954	20.6126	0.310988	20.6126	0.453552
938	20.6346	0.41486	20.6346	0.337135	20.6346	0.404098	20.6346	0.310276	20.6346	0.398954	20.6346	0.310988	20.6346	0.453552
939	20.6567	0.41486	20.6567	0.337135	20.6567	0.404098	20.6567	0.310276	20.6567	0.398954	20.6567	0.310988	20.6567	0.453552
940	20.6787	0.41486	20.6787	0.337135	20.6787	0.404098	20.6787	0.310276	20.6787	0.398954	20.6787	0.310988	20.6787	0.453552
941	20.7007	0.41486	20.7007	0.337135	20.7007	0.404098	20.7007	0.310276	20.7007	0.398954	20.7007	0.310988	20.7007	0.453552
942	20.7227	0.41486	20.7227	0.337135	20.7227	0.404098	20.7227	0.310276	20.7227	0.398954	20.7227	0.310988	20.7227	0.453552
943	20.7447	0.41486	20.7447	0.337135	20.7447	0.404098	20.7447	0.310276	20.7447	0.398954	20.7447	0.310988	20.7447	0.453552
944	20.7668	0.41486	20.7668	0.337135	20.7668	0.404098	20.7668	0.310276	20.7668	0.398954	20.7668	0.310988	20.7668	0.453552
945	20.7888	0.41486	20.7888	0.337135	20.7888	0.404098	20.7888	0.310276	20.7888	0.398954	20.7888	0.310988	20.7888	0.453552
946	20.8108	0.41486	20.8108	0.337135	20.8108	0.404098	20.8108	0.310276	20.8108	0.398954	20.8108	0.310988	20.8108	0.453552
947	20.8328	0.41486	20.8328	0.337135	20.8328	0.404098	20.8328	0.310276	20.8328	0.398954	20.8328	0.310988	20.8328	0.453552
948	20.8549	0.41486	20.8549	0.337135	20.8549	0.404098	20.8549	0.310276	20.8549	0.398954	20.8549	0.310988	20.8549	0.453552
949	20.8769	0.41486	20.8769	0.337135	20.8769	0.404098	20.8769	0.310276	20.8769	0.398954	20.8769	0.310988	20.8769	0.453552
950	20.8989	0.41486	20.8989	0.337135	20.8989	0.404098	20.8989	0.310276	20.8989	0.398954	20.8989	0.310988	20.8989	0.453552
951	20.9209	0.41486	20.9209	0.337135	20.9209	0.404098	20.9209	0.310276	20.9209	0.398954	20.9209	0.310988	20.9209	0.453552
952	20.9429	0.41486	20.9429	0.337135	20.9429	0.404098	20.9429	0.310276	20.9429	0.398954	20.9429	0.310988	20.9429	0.453552
953	20.965	0.41486	20.965	0.337135	20.965	0.404098	20.965	0.310276	20.965	0.398954	20.965	0.310988	20.965	0.453552
954	20.987	0.41486	20.987	0.337135	20.987	0.404098	20.987	0.310276	20.987	0.398954	20.987	0.310988	20.987	0.453552
955	21.009	0.41486	21.009	0.337135	21.009	0.404098	21.009	0.310276	21.009	0.398954	21.009	0.310988	21.009	0.453552
956	21.031	0.41486	21.031	0.337135	21.031	0.404098	21.031	0.310276	21.031	0.398954	21.031	0.310988	21.031	0.453552
957	21.0531	0.41486	21.0531	0.337135	21.0531	0.404098	21.0531	0.310276	21.0531	0.398954	21.0531	0.310988	21.0531	0.453552
958	21.0751	0.41486	21.0751	0.337135	21.0751	0.404098	21.0751	0.310276	21.0751	0.398954	21.0751	0.310988	21.0751	0.453552
959	21.0971	0.41486	21.0971	0.337135	21.0971	0.404098	21.0971	0.310276	21.0971	0.398954	21.0971	0.310988	21.0971	0.453552
960	21.1191	0.41486	21.1191	0.337135	21.1191	0.404098	21.1191	0.310276	21.1191	0.398954	21.1191	0.310988	21.1191	0.453552
961	21.1411	0.41486	21.1411	0.337135	21.1411	0.404098	21.1411	0.310276	21.1411	0.398954	21.1411	0.310988	21.1411	0.453552
962	21.1632	0.41486	21.1632	0.337135	21.1632	0.404098	21.1632	0.310276	21.1632	0.398954	21.1632	0.310988	21.1632	0.453552
963	21.1852	0.41486	21.1852	0.337135	21.1852	0.404098	21.1852	0.310276	21.1852	0.398954	21.1852	0.310988	21.1852	0.453552
964	21.2072	0.41486	21.2072	0.337135	21.2072	0.404098	21.2072	0.310276	21.2072	0.398954	21.2072	0.310988	21.2072	0.453552
965	21.2292	0.41486	21.2292	0.337135	21.2292	0.404098	21.2292	0.310276	21.2292	0.398954	21.2292	0.310988	21.2292	0.453552
966	21.2513	0.41486	21.2513	0.337135	21.2513	0.404098	21.2513	0.310276	21.2513	0.398954	21.2513	0.310988	21.2513	0.453552
967	21.2733	0.41486	21.2733	0.337135	21.2733	0.404098	21.2733	0.310276	21.2733	0.398954	21.2733	0.310988	21.2733	0.453552
968	21.2953	0.41486	21.2953	0.337135	21.2953	0.404098	21.2953	0.310276	21.2953	0.398954	21.2953	0.310988	21.2953	0.453552
969	21.3173	0.41486	21.3173	0.337135	21.3173	0.404098	21.3173	0.310276	21.3173	0.398954	21.3173	0.310988	21.3173	0.453552
970	21.3393	0.41486	21.3393	0.337135	21.3393	0.404098	21.3393	0.310276	21.3393	0.398954	21.3393	0.310988	21.3393	0.453552
971	21.3614	0.41486	21.3614	0.337135	21.3614	0.404098	21.3614	0.310276	21.3614	0.398954	21.3614	0.310988	21.3614	0.453552
972	21.3834	0.41486	21.3834	0.337135	21.3834	0.404098	21.3834	0.310276	21.3834	0.398954	21.3834	0.310988	21.3834	0.453552
973	21.4054	0.41486	21.4054	0.337135	21.4054	0.404098	21.4054	0.310276	21.4054	0.398954	21.4054	0.310988	21.4054	0.453552
974	21.4274	0.41486	21.4274	0.337135	21.4274	0.404098	21.4274	0.310276	21.4274	0.398954	21.4274	0.310988	21.4274	0.453552
975	21.4494	0.41486	21.4494	0.337135	21.4494	0.404098	21.4494	0.310276	21.4494	0.398954	21.4494	0.310988	21.4494	0.453552
976	21.4715	0.41486	21.4715	0.337135	21.4715	0.404098	21.4715	0.310276	21.4715	0.398954	21.4715	0.310988	21.4715	0.453552
977	21.4935	0.41486	21.4935	0.337135	21.4935	0.404098	21.4935	0.310276	21.4935	0.398954	21.4935	0.310988	21.4935	0.453552
978	21.5155	0.41486	21.5155	0.337135	21.5155	0.404098	21.5155	0.310276	21.5155	0.398954	21.5155	0.310988	21.5155	0.453552
979	21.5375	0.41486	21.5375	0.337135	21.5375	0.404098	21.5375	0.310276	21.5375	0.398954	21.5375	0.310988	21.5375	0.453552
980	21.5596	0.41486	21.5596	0.337135	21.5596	0.404098	21.5596	0.310276	21.5596	0.398954	21.5596	0.310988	21.5596	0.453552
981	21.5816	0.41486	21.5816	0.337135	21.5816	0.404098	21.5816	0.310276	21.5816	0.398954	21.5816	0.310988	21.5816	0.453552
982	21.6036	0.41486	21.6036	0.337135	21.6036	0.404098	21.6036	0.310276	21.6036	0.398954	21.6036	0.310988	21.6036	0.453552
983	21.6256	0.41486	21.6256	0.337135	21.6256	0.404098	21.6256	0.310276	21.6256	0.398954	21.6256	0.310988	21.6256	0.453552
984	21.6476	0.41486	21.6476	0.337135	21.6476	0.404098	21.6476	0.310276	21.6476	0.398954	21.6476	0.310988	21.6476	0.453552
985	21.6697	0.41486	21.6697	0.337135	21.6697	0.404098	21.6697	0.310276	21.6697	0.398954	21.6697	0.310988	21.6697	0.453552
986	21.6917	0.41486	21.6917	0.337135	21.6917	0.404098	21.6917	0.310276	21.6917	0.398954	21.6917	0.310988	21.6917	0.453552
987	21.7137	0.41486	21.7137	0.337135	21.7137	0.404098	21.7137	0.310276	21.7137	0.398954	21.7137	0.310988	21.7137	0.453552
988	21.7357	0.41486	21.7357	0.337135	21.7357	0.404098	21.7357	0.310276	21.7357	0.398954	21.7357	0.310988	21.7357	0.453552
989	21.7578	0.41486	21.7578	0.337135	21.7578	0.404098	21.7578	0.310276	21.7578	0.398954	21.7578	0.310988	21.7578	0.453552
990	21.7798	0.41486	21.7798	0.337135	21.7798	0.404098	21.7798	0.310276	21.7798	0.398954	21.7798	0.310988	21.7798	0.453552
991	21.8018	0.41486	21.8018	0.337135	21.8018	0.404098	21.8018	0.310276	21.8018	0.398954	21.8018	0.310988	21.8018	0.453552
992	21.8238	0.41486	21.8238	0.337135	21.8238	0.404098	21.8238	0.310276	21.8238	0.398954	21.8238	0.310988	21.8238	0.453552
993	21.8458	0.41486	21.8458	0.337135	21.8458	0.404098	21.8458	0.310276	21.8458	0.398954	21.8458	0.310988	21.8458	0.453552
994	21.8679	0.41486	21.8679	0.337135	21.8679	0.404098	21.8679	0.310276	21.8679	0.398954	21.8679	0.310988	21.8679	0.453552
995	21.8899	0.41486	21.8899	0.337135	21.8899	0.404098	21.8899	0.310276	21.8899	0.398954	21.8899	0.310988	21.8899	0.453552
996	21.9119	0.41486	21.9119	0.337135	21.9119	0.404098	21.9119	0.310276	21.9119	0.398954	21.9119	0.310988	21.9119	0.453552
997	21.9339	0.41486	21.9339	0.337135	21.9339	0.404098	21.9339	0.310276	21.9339	0.398954	21.9339	0.310988	21.9339	0.453552
998	21.956	0.41486	21.956	0.337135	21.956	0.404098	21.956	0.310276	21.956	0.398954	21.956	0.310988	21.956	0.453552
999	21.978	0.41486	21.978	0.337135	21.978	0.404098	21.978	0.310276	21.978	0.398954	21.978	0.310988	21.978	0.453552
1000	22	0.41486	22	0.337135	22	0.404098	22	0.310276	22	0.398954	22	0.310988	22	0.453552

## Sheet: def_ecuador
Ecuador	actual period		2040_ssp370		2040_ssp585		2070_ssp370		2070_ssp585		2100_ssp370		2100_ssp585
	x	y	x	y	x	y	x	y	x	y	x	y	x	y
1	0	0.704669	0	0.704669	0	0.704669	0	0.704669	0	0.704669	0	0.704669	0	0.704669
2	0.022022	0.66407	0.022022	0.66407	0.022022	0.66407	0.022022	0.66407	0.022022	0.66407	0.022022	0.66407	0.022022	0.66407
3	0.044044	0.66407	0.044044	0.66407	0.044044	0.66407	0.044044	0.66407	0.044044	0.66407	0.044044	0.66407	0.044044	0.66407
4	0.0660661	0.66407	0.0660661	0.66407	0.0660661	0.66407	0.0660661	0.66407	0.0660661	0.66407	0.0660661	0.66407	0.0660661	0.66407
5	0.0880881	0.66407	0.0880881	0.66407	0.0880881	0.66407	0.0880881	0.66407	0.0880881	0.66407	0.0880881	0.66407	0.0880881	0.66407
6	0.22022	0.607257	0.22022	0.607257	0.22022	0.607257	0.22022	0.607257	0.22022	0.607257	0.22022	0.607257	0.22022	0.607257
7	0.242242	0.607257	0.242242	0.607257	0.242242	0.607257	0.242242	0.607257	0.242242	0.607257	0.242242	0.607257	0.242242	0.607257
8	0.264264	0.607257	0.264264	0.607257	0.264264	0.607257	0.264264	0.607257	0.264264	0.607257	0.264264	0.607257	0.264264	0.607257
9	0.286286	0.607257	0.286286	0.607257	0.286286	0.607257	0.286286	0.607257	0.286286	0.607257	0.286286	0.607257	0.286286	0.607257
10	0.308308	0.607257	0.308308	0.607257	0.308308	0.607257	0.308308	0.607257	0.308308	0.607257	0.308308	0.607257	0.308308	0.607257
11	0.33033	0.607257	0.33033	0.607257	0.33033	0.607257	0.33033	0.607257	0.33033	0.607257	0.33033	0.607257	0.33033	0.607257
12	0.352352	0.607257	0.352352	0.607257	0.352352	0.607257	0.352352	0.607257	0.352352	0.607257	0.352352	0.607257	0.352352	0.607257
13	0.374374	0.607257	0.374374	0.607257	0.374374	0.607257	0.374374	0.607257	0.374374	0.607257	0.374374	0.607257	0.374374	0.607257
14	0.396396	0.607257	0.396396	0.607257	0.396396	0.607257	0.396396	0.607257	0.396396	0.607257	0.396396	0.607257	0.396396	0.607257
15	0.418418	0.607257	0.418418	0.607257	0.418418	0.607257	0.418418	0.607257	0.418418	0.607257	0.418418	0.607257	0.418418	0.607257
16	0.44044	0.607257	0.44044	0.607257	0.44044	0.607257	0.44044	0.607257	0.44044	0.607257	0.44044	0.607257	0.44044	0.607257
17	0.462462	0.607257	0.462462	0.607257	0.462462	0.607257	0.462462	0.607257	0.462462	0.607257	0.462462	0.607257	0.462462	0.607257
18	0.484484	0.607257	0.484484	0.607257	0.484484	0.607257	0.484484	0.607257	0.484484	0.607257	0.484484	0.607257	0.484484	0.607257
19	0.506507	0.607257	0.506507	0.607257	0.506507	0.607257	0.506507	0.607257	0.506507	0.607257	0.506507	0.607257	0.506507	0.607257
20	0.528529	0.607257	0.528529	0.607257	0.528529	0.607257	0.528529	0.607257	0.528529	0.607257	0.528529	0.607257	0.528529	0.607257
21	0.550551	0.607257	0.550551	0.607257	0.550551	0.607257	0.550551	0.607257	0.550551	0.607257	0.550551	0.607257	0.550551	0.607257
22	0.132132	0.595224	0.132132	0.595224	0.132132	0.595224	0.132132	0.595224	0.132132	0.595224	0.132132	0.595224	0.132132	0.595224
23	0.154154	0.595224	0.154154	0.595224	0.154154	0.595224	0.154154	0.595224	0.154154	0.595224	0.154154	0.595224	0.154154	0.595224
24	0.176176	0.595224	0.176176	0.595224	0.176176	0.595224	0.176176	0.595224	0.176176	0.595224	0.176176	0.595224	0.176176	0.595224
25	0.198198	0.595224	0.198198	0.595224	0.198198	0.595224	0.198198	0.595224	0.198198	0.595224	0.198198	0.595224	0.198198	0.595224
26	0.572573	0.595224	0.572573	0.595224	0.572573	0.595224	0.572573	0.595224	0.572573	0.595224	0.572573	0.595224	0.572573	0.595224
27	0.594595	0.595224	0.594595	0.595224	0.594595	0.595224	0.594595	0.595224	0.594595	0.595224	0.594595	0.595224	0.594595	0.595224
28	0.616617	0.595224	0.616617	0.595224	0.616617	0.595224	0.616617	0.595224	0.616617	0.595224	0.616617	0.595224	0.616617	0.595224
29	0.638639	0.595224	0.638639	0.595224	0.638639	0.595224	0.638639	0.595224	0.638639	0.595224	0.638639	0.595224	0.638639	0.595224
30	0.660661	0.595224	0.660661	0.595224	0.660661	0.595224	0.660661	0.595224	0.660661	0.595224	0.660661	0.595224	0.660661	0.595224
31	0.682683	0.595224	0.682683	0.595224	0.682683	0.595224	0.682683	0.595224	0.682683	0.595224	0.682683	0.595224	0.682683	0.595224
32	0.704705	0.595224	0.704705	0.595224	0.704705	0.595224	0.704705	0.595224	0.704705	0.595224	0.704705	0.595224	0.704705	0.595224
33	0.726727	0.595224	0.726727	0.595224	0.726727	0.595224	0.726727	0.595224	0.726727	0.595224	0.726727	0.595224	0.726727	0.595224
34	0.748749	0.595224	0.748749	0.595224	0.748749	0.595224	0.748749	0.595224	0.748749	0.595224	0.748749	0.595224	0.748749	0.595224
35	0.770771	0.595224	0.770771	0.595224	0.770771	0.595224	0.770771	0.595224	0.770771	0.595224	0.770771	0.595224	0.770771	0.595224
36	0.792793	0.595224	0.792793	0.595224	0.792793	0.595224	0.792793	0.595224	0.792793	0.595224	0.792793	0.595224	0.792793	0.595224
37	0.814815	0.595224	0.814815	0.595224	0.814815	0.595224	0.814815	0.595224	0.814815	0.595224	0.814815	0.595224	0.814815	0.595224
38	0.836837	0.595224	0.836837	0.595224	0.836837	0.595224	0.836837	0.595224	0.836837	0.595224	0.836837	0.595224	0.836837	0.595224
39	0.858859	0.595224	0.858859	0.595224	0.858859	0.595224	0.858859	0.595224	0.858859	0.595224	0.858859	0.595224	0.858859	0.595224
40	0.880881	0.595224	0.880881	0.595224	0.880881	0.595224	0.880881	0.595224	0.880881	0.595224	0.880881	0.595224	0.880881	0.595224
41	0.902903	0.595224	0.902903	0.595224	0.902903	0.595224	0.902903	0.595224	0.902903	0.595224	0.902903	0.595224	0.902903	0.595224
42	0.924925	0.595224	0.924925	0.595224	0.924925	0.595224	0.924925	0.595224	0.924925	0.595224	0.924925	0.595224	0.924925	0.595224
43	0.946947	0.595224	0.946947	0.595224	0.946947	0.595224	0.946947	0.595224	0.946947	0.595224	0.946947	0.595224	0.946947	0.595224
44	0.968969	0.595224	0.968969	0.595224	0.968969	0.595224	0.968969	0.595224	0.968969	0.595224	0.968969	0.595224	0.968969	0.595224
45	0.990991	0.595224	0.990991	0.595224	0.990991	0.595224	0.990991	0.595224	0.990991	0.595224	0.990991	0.595224	0.990991	0.595224
46	1.01301	0.595224	1.01301	0.595224	1.01301	0.595224	1.01301	0.595224	1.01301	0.595224	1.01301	0.595224	1.01301	0.595224
47	1.03504	0.595224	1.03504	0.595224	1.03504	0.595224	1.03504	0.595224	1.03504	0.595224	1.03504	0.595224	1.03504	0.595224
48	1.05706	0.595224	1.05706	0.595224	1.05706	0.595224	1.05706	0.595224	1.05706	0.595224	1.05706	0.595224	1.05706	0.595224
49	1.07908	0.595224	1.07908	0.595224	1.07908	0.595224	1.07908	0.595224	1.07908	0.595224	1.07908	0.595224	1.07908	0.595224
50	1.1011	0.595224	1.1011	0.595224	1.1011	0.595224	1.1011	0.595224	1.1011	0.595224	1.1011	0.595224	1.1011	0.595224
51	1.12312	0.595224	1.12312	0.595224	1.12312	0.595224	1.12312	0.595224	1.12312	0.595224	1.12312	0.595224	1.12312	0.595224
52	1.14515	0.595224	1.14515	0.595224	1.14515	0.595224	1.14515	0.595224	1.14515	0.595224	1.14515	0.595224	1.14515	0.595224
53	1.16717	0.595224	1.16717	0.595224	1.16717	0.595224	1.16717	0.595224	1.16717	0.595224	1.16717	0.595224	1.16717	0.595224
54	1.18919	0.595224	1.18919	0.595224	1.18919	0.595224	1.18919	0.595224	1.18919	0.595224	1.18919	0.595224	1.18919	0.595224
55	1.21121	0.595224	1.21121	0.595224	1.21121	0.595224	1.21121	0.595224	1.21121	0.595224	1.21121	0.595224	1.21121	0.595224
56	1.23323	0.595224	1.23323	0.595224	1.23323	0.595224	1.23323	0.595224	1.23323	0.595224	1.23323	0.595224	1.23323	0.595224
57	1.25526	0.595224	1.25526	0.595224	1.25526	0.595224	1.25526	0.595224	1.25526	0.595224	1.25526	0.595224	1.25526	0.595224
58	1.27728	0.595224	1.27728	0.595224	1.27728	0.595224	1.27728	0.595224	1.27728	0.595224	1.27728	0.595224	1.27728	0.595224
59	1.2993	0.595224	1.2993	0.595224	1.2993	0.595224	1.2993	0.595224	1.2993	0.595224	1.2993	0.595224	1.2993	0.595224
60	1.32132	0.595224	1.32132	0.595224	1.32132	0.595224	1.32132	0.595224	1.32132	0.595224	1.32132	0.595224	1.32132	0.595224
61	1.34334	0.595224	1.34334	0.595224	1.34334	0.595224	1.34334	0.595224	1.34334	0.595224	1.34334	0.595224	1.34334	0.595224
62	1.36537	0.595224	1.36537	0.595224	1.36537	0.595224	1.36537	0.595224	1.36537	0.595224	1.36537	0.595224	1.36537	0.595224
63	1.38739	0.595224	1.38739	0.595224	1.38739	0.595224	1.38739	0.595224	1.38739	0.595224	1.38739	0.595224	1.38739	0.595224
64	1.40941	0.595224	1.40941	0.595224	1.40941	0.595224	1.40941	0.595224	1.40941	0.595224	1.40941	0.595224	1.40941	0.595224
65	1.43143	0.595224	1.43143	0.595224	1.43143	0.595224	1.43143	0.595224	1.43143	0.595224	1.43143	0.595224	1.43143	0.595224
66	1.45345	0.595224	1.45345	0.595224	1.45345	0.595224	1.45345	0.595224	1.45345	0.595224	1.45345	0.595224	1.45345	0.595224
67	1.47548	0.595224	1.47548	0.595224	1.47548	0.595224	1.47548	0.595224	1.47548	0.595224	1.47548	0.595224	1.47548	0.595224
68	1.4975	0.595224	1.4975	0.595224	1.4975	0.595224	1.4975	0.595224	1.4975	0.595224	1.4975	0.595224	1.4975	0.595224
69	1.51952	0.595224	1.51952	0.595224	1.51952	0.595224	1.51952	0.595224	1.51952	0.595224	1.51952	0.595224	1.51952	0.595224
70	1.54154	0.595224	1.54154	0.595224	1.54154	0.595224	1.54154	0.595224	1.54154	0.595224	1.54154	0.595224	1.54154	0.595224
71	1.56356	0.595224	1.56356	0.595224	1.56356	0.595224	1.56356	0.595224	1.56356	0.595224	1.56356	0.595224	1.56356	0.595224
72	1.58559	0.595224	1.58559	0.595224	1.58559	0.595224	1.58559	0.595224	1.58559	0.595224	1.58559	0.595224	1.58559	0.595224
73	1.60761	0.595224	1.60761	0.595224	1.60761	0.595224	1.60761	0.595224	1.60761	0.595224	1.60761	0.595224	1.60761	0.595224
74	1.62963	0.595224	1.62963	0.595224	1.62963	0.595224	1.62963	0.595224	1.62963	0.595224	1.62963	0.595224	1.62963	0.595224
75	1.65165	0.595224	1.65165	0.595224	1.65165	0.595224	1.65165	0.595224	1.65165	0.595224	1.65165	0.595224	1.65165	0.595224
76	1.67367	0.595224	1.67367	0.595224	1.67367	0.595224	1.67367	0.595224	1.67367	0.595224	1.67367	0.595224	1.67367	0.595224
77	1.6957	0.595224	1.6957	0.595224	1.6957	0.595224	1.6957	0.595224	1.6957	0.595224	1.6957	0.595224	1.6957	0.595224
78	1.71772	0.595224	1.71772	0.595224	1.71772	0.595224	1.71772	0.595224	1.71772	0.595224	1.71772	0.595224	1.71772	0.595224
79	1.73974	0.595224	1.73974	0.595224	1.73974	0.595224	1.73974	0.595224	1.73974	0.595224	1.73974	0.595224	1.73974	0.595224
80	1.76176	0.595224	1.76176	0.595224	1.76176	0.595224	1.76176	0.595224	1.76176	0.595224	1.76176	0.595224	1.76176	0.595224
81	1.78378	0.595224	1.78378	0.595224	1.78378	0.595224	1.78378	0.595224	1.78378	0.595224	1.78378	0.595224	1.78378	0.595224
82	1.80581	0.595224	1.80581	0.595224	1.80581	0.595224	1.80581	0.595224	1.80581	0.595224	1.80581	0.595224	1.80581	0.595224
83	1.82783	0.595224	1.82783	0.595224	1.82783	0.595224	1.82783	0.595224	1.82783	0.595224	1.82783	0.595224	1.82783	0.595224
84	1.84985	0.595224	1.84985	0.595224	1.84985	0.595224	1.84985	0.595224	1.84985	0.595224	1.84985	0.595224	1.84985	0.595224
85	1.87187	0.595224	1.87187	0.595224	1.87187	0.595224	1.87187	0.595224	1.87187	0.595224	1.87187	0.595224	1.87187	0.595224
86	1.89389	0.595224	1.89389	0.595224	1.89389	0.595224	1.89389	0.595224	1.89389	0.595224	1.89389	0.595224	1.89389	0.595224
87	1.91592	0.595224	1.91592	0.595224	1.91592	0.595224	1.91592	0.595224	1.91592	0.595224	1.91592	0.595224	1.91592	0.595224
88	1.93794	0.595224	1.93794	0.595224	1.93794	0.595224	1.93794	0.595224	1.93794	0.595224	1.93794	0.595224	1.93794	0.595224
89	1.95996	0.595224	1.95996	0.595224	1.95996	0.595224	1.95996	0.595224	1.95996	0.595224	1.95996	0.595224	1.95996	0.595224
90	1.98198	0.595224	1.98198	0.595224	1.98198	0.595224	1.98198	0.595224	1.98198	0.595224	1.98198	0.595224	1.98198	0.595224
91	2.004	0.595224	2.004	0.595224	2.004	0.595224	2.004	0.595224	2.004	0.595224	2.004	0.595224	2.004	0.595224
92	2.02603	0.595224	2.02603	0.595224	2.02603	0.595224	2.02603	0.595224	2.02603	0.595224	2.02603	0.595224	2.02603	0.595224
93	2.04805	0.595224	2.04805	0.595224	2.04805	0.595224	2.04805	0.595224	2.04805	0.595224	2.04805	0.595224	2.04805	0.595224
94	2.07007	0.595224	2.07007	0.595224	2.07007	0.595224	2.07007	0.595224	2.07007	0.595224	2.07007	0.595224	2.07007	0.595224
95	2.09209	0.595224	2.09209	0.595224	2.09209	0.595224	2.09209	0.595224	2.09209	0.595224	2.09209	0.595224	2.09209	0.595224
96	2.11411	0.595224	2.11411	0.595224	2.11411	0.595224	2.11411	0.595224	2.11411	0.595224	2.11411	0.595224	2.11411	0.595224
97	2.13614	0.595224	2.13614	0.595224	2.13614	0.595224	2.13614	0.595224	2.13614	0.595224	2.13614	0.595224	2.13614	0.595224
98	2.15816	0.595224	2.15816	0.595224	2.15816	0.595224	2.15816	0.595224	2.15816	0.595224	2.15816	0.595224	2.15816	0.595224
99	2.18018	0.595224	2.18018	0.595224	2.18018	0.595224	2.18018	0.595224	2.18018	0.595224	2.18018	0.595224	2.18018	0.595224
100	2.2022	0.595224	2.2022	0.595224	2.2022	0.595224	2.2022	0.595224	2.2022	0.595224	2.2022	0.595224	2.2022	0.595224
101	2.22422	0.595224	2.22422	0.595224	2.22422	0.595224	2.22422	0.595224	2.22422	0.595224	2.22422	0.595224	2.22422	0.595224
102	2.24625	0.595224	2.24625	0.595224	2.24625	0.595224	2.24625	0.595224	2.24625	0.595224	2.24625	0.595224	2.24625	0.595224
103	2.26827	0.595224	2.26827	0.595224	2.26827	0.595224	2.26827	0.595224	2.26827	0.595224	2.26827	0.595224	2.26827	0.595224
104	2.29029	0.595224	2.29029	0.595224	2.29029	0.595224	2.29029	0.595224	2.29029	0.595224	2.29029	0.595224	2.29029	0.595224
105	2.31231	0.595224	2.31231	0.595224	2.31231	0.595224	2.31231	0.595224	2.31231	0.595224	2.31231	0.595224	2.31231	0.595224
106	2.33433	0.595224	2.33433	0.595224	2.33433	0.595224	2.33433	0.595224	2.33433	0.595224	2.33433	0.595224	2.33433	0.595224
107	2.35636	0.595224	2.35636	0.595224	2.35636	0.595224	2.35636	0.595224	2.35636	0.595224	2.35636	0.595224	2.35636	0.595224
108	2.37838	0.595224	2.37838	0.595224	2.37838	0.595224	2.37838	0.595224	2.37838	0.595224	2.37838	0.595224	2.37838	0.595224
109	2.4004	0.595224	2.4004	0.595224	2.4004	0.595224	2.4004	0.595224	2.4004	0.595224	2.4004	0.595224	2.4004	0.595224
110	2.42242	0.595224	2.42242	0.595224	2.42242	0.595224	2.42242	0.595224	2.42242	0.595224	2.42242	0.595224	2.42242	0.595224
111	2.44444	0.595224	2.44444	0.595224	2.44444	0.595224	2.44444	0.595224	2.44444	0.595224	2.44444	0.595224	2.44444	0.595224
112	2.46647	0.595224	2.46647	0.595224	2.46647	0.595224	2.46647	0.595224	2.46647	0.595224	2.46647	0.595224	2.46647	0.595224
113	2.48849	0.595224	2.48849	0.595224	2.48849	0.595224	2.48849	0.595224	2.48849	0.595224	2.48849	0.595224	2.48849	0.595224
114	2.51051	0.595224	2.51051	0.595224	2.51051	0.595224	2.51051	0.595224	2.51051	0.595224	2.51051	0.595224	2.51051	0.595224
115	2.53253	0.595224	2.53253	0.595224	2.53253	0.595224	2.53253	0.595224	2.53253	0.595224	2.53253	0.595224	2.53253	0.595224
116	2.55455	0.595224	2.55455	0.595224	2.55455	0.595224	2.55455	0.595224	2.55455	0.595224	2.55455	0.595224	2.55455	0.595224
117	2.57658	0.595224	2.57658	0.595224	2.57658	0.595224	2.57658	0.595224	2.57658	0.595224	2.57658	0.595224	2.57658	0.595224
118	2.5986	0.595224	2.5986	0.595224	2.5986	0.595224	2.5986	0.595224	2.5986	0.595224	2.5986	0.595224	2.5986	0.595224
119	2.62062	0.595224	2.62062	0.595224	2.62062	0.595224	2.62062	0.595224	2.62062	0.595224	2.62062	0.595224	2.62062	0.595224
120	2.64264	0.595224	2.64264	0.595224	2.64264	0.595224	2.64264	0.595224	2.64264	0.595224	2.64264	0.595224	2.64264	0.595224
121	2.66466	0.595224	2.66466	0.595224	2.66466	0.595224	2.66466	0.595224	2.66466	0.595224	2.66466	0.595224	2.66466	0.595224
122	2.68669	0.595224	2.68669	0.595224	2.68669	0.595224	2.68669	0.595224	2.68669	0.595224	2.68669	0.595224	2.68669	0.595224
123	2.70871	0.595224	2.70871	0.595224	2.70871	0.595224	2.70871	0.595224	2.70871	0.595224	2.70871	0.595224	2.70871	0.595224
124	2.73073	0.595224	2.73073	0.595224	2.73073	0.595224	2.73073	0.595224	2.73073	0.595224	2.73073	0.595224	2.73073	0.595224
125	2.75275	0.595224	2.75275	0.595224	2.75275	0.595224	2.75275	0.595224	2.75275	0.595224	2.75275	0.595224	2.75275	0.595224
126	2.77477	0.595224	2.77477	0.595224	2.77477	0.595224	2.77477	0.595224	2.77477	0.595224	2.77477	0.595224	2.77477	0.595224
127	2.7968	0.595224	2.7968	0.595224	2.7968	0.595224	2.7968	0.595224	2.7968	0.595224	2.7968	0.595224	2.7968	0.595224
128	2.81882	0.595224	2.81882	0.595224	2.81882	0.595224	2.81882	0.595224	2.81882	0.595224	2.81882	0.595224	2.81882	0.595224
129	2.84084	0.595224	2.84084	0.595224	2.84084	0.595224	2.84084	0.595224	2.84084	0.595224	2.84084	0.595224	2.84084	0.595224
130	2.86286	0.595224	2.86286	0.595224	2.86286	0.595224	2.86286	0.595224	2.86286	0.595224	2.86286	0.595224	2.86286	0.595224
131	2.88488	0.595224	2.88488	0.595224	2.88488	0.595224	2.88488	0.595224	2.88488	0.595224	2.88488	0.595224	2.88488	0.595224
132	2.90691	0.595224	2.90691	0.595224	2.90691	0.595224	2.90691	0.595224	2.90691	0.595224	2.90691	0.595224	2.90691	0.595224
133	2.92893	0.595224	2.92893	0.595224	2.92893	0.595224	2.92893	0.595224	2.92893	0.595224	2.92893	0.595224	2.92893	0.595224
134	2.95095	0.595224	2.95095	0.595224	2.95095	0.595224	2.95095	0.595224	2.95095	0.595224	2.95095	0.595224	2.95095	0.595224
135	2.97297	0.595224	2.97297	0.595224	2.97297	0.595224	2.97297	0.595224	2.97297	0.595224	2.97297	0.595224	2.97297	0.595224
136	2.99499	0.595224	2.99499	0.595224	2.99499	0.595224	2.99499	0.595224	2.99499	0.595224	2.99499	0.595224	2.99499	0.595224
137	3.01702	0.595224	3.01702	0.595224	3.01702	0.595224	3.01702	0.595224	3.01702	0.595224	3.01702	0.595224	3.01702	0.595224
138	3.03904	0.595224	3.03904	0.595224	3.03904	0.595224	3.03904	0.595224	3.03904	0.595224	3.03904	0.595224	3.03904	0.595224
139	3.06106	0.595224	3.06106	0.595224	3.06106	0.595224	3.06106	0.595224	3.06106	0.595224	3.06106	0.595224	3.06106	0.595224
140	3.08308	0.595224	3.08308	0.595224	3.08308	0.595224	3.08308	0.595224	3.08308	0.595224	3.08308	0.595224	3.08308	0.595224
141	3.10511	0.595224	3.10511	0.595224	3.10511	0.595224	3.10511	0.595224	3.10511	0.595224	3.10511	0.595224	3.10511	0.595224
142	3.12713	0.595224	3.12713	0.595224	3.12713	0.595224	3.12713	0.595224	3.12713	0.595224	3.12713	0.595224	3.12713	0.595224
143	3.14915	0.595224	3.14915	0.595224	3.14915	0.595224	3.14915	0.595224	3.14915	0.595224	3.14915	0.595224	3.14915	0.595224
144	3.17117	0.595224	3.17117	0.595224	3.17117	0.595224	3.17117	0.595224	3.17117	0.595224	3.17117	0.595224	3.17117	0.595224
145	3.19319	0.595224	3.19319	0.595224	3.19319	0.595224	3.19319	0.595224	3.19319	0.595224	3.19319	0.595224	3.19319	0.595224
146	3.21522	0.595224	3.21522	0.595224	3.21522	0.595224	3.21522	0.595224	3.21522	0.595224	3.21522	0.595224	3.21522	0.595224
147	3.23724	0.595224	3.23724	0.595224	3.23724	0.595224	3.23724	0.595224	3.23724	0.595224	3.23724	0.595224	3.23724	0.595224
148	3.25926	0.595224	3.25926	0.595224	3.25926	0.595224	3.25926	0.595224	3.25926	0.595224	3.25926	0.595224	3.25926	0.595224
149	3.28128	0.595224	3.28128	0.595224	3.28128	0.595224	3.28128	0.595224	3.28128	0.595224	3.28128	0.595224	3.28128	0.595224
150	3.3033	0.595224	3.3033	0.595224	3.3033	0.595224	3.3033	0.595224	3.3033	0.595224	3.3033	0.595224	3.3033	0.595224
151	3.32533	0.595224	3.32533	0.595224	3.32533	0.595224	3.32533	0.595224	3.32533	0.595224	3.32533	0.595224	3.32533	0.595224
152	3.34735	0.595224	3.34735	0.595224	3.34735	0.595224	3.34735	0.595224	3.34735	0.595224	3.34735	0.595224	3.34735	0.595224
153	3.36937	0.595224	3.36937	0.595224	3.36937	0.595224	3.36937	0.595224	3.36937	0.595224	3.36937	0.595224	3.36937	0.595224
154	3.39139	0.595224	3.39139	0.595224	3.39139	0.595224	3.39139	0.595224	3.39139	0.595224	3.39139	0.595224	3.39139	0.595224
155	3.41341	0.595224	3.41341	0.595224	3.41341	0.595224	3.41341	0.595224	3.41341	0.595224	3.41341	0.595224	3.41341	0.595224
156	3.43544	0.595224	3.43544	0.595224	3.43544	0.595224	3.43544	0.595224	3.43544	0.595224	3.43544	0.595224	3.43544	0.595224
157	3.45746	0.595224	3.45746	0.595224	3.45746	0.595224	3.45746	0.595224	3.45746	0.595224	3.45746	0.595224	3.45746	0.595224
158	3.47948	0.595224	3.47948	0.595224	3.47948	0.595224	3.47948	0.595224	3.47948	0.595224	3.47948	0.595224	3.47948	0.595224
159	3.5015	0.595224	3.5015	0.595224	3.5015	0.595224	3.5015	0.595224	3.5015	0.595224	3.5015	0.595224	3.5015	0.595224
160	3.52352	0.595224	3.52352	0.595224	3.52352	0.595224	3.52352	0.595224	3.52352	0.595224	3.52352	0.595224	3.52352	0.595224
161	3.54555	0.595224	3.54555	0.595224	3.54555	0.595224	3.54555	0.595224	3.54555	0.595224	3.54555	0.595224	3.54555	0.595224
162	3.56757	0.595224	3.56757	0.595224	3.56757	0.595224	3.56757	0.595224	3.56757	0.595224	3.56757	0.595224	3.56757	0.595224
163	3.58959	0.595224	3.58959	0.595224	3.58959	0.595224	3.58959	0.595224	3.58959	0.595224	3.58959	0.595224	3.58959	0.595224
164	3.61161	0.595224	3.61161	0.595224	3.61161	0.595224	3.61161	0.595224	3.61161	0.595224	3.61161	0.595224	3.61161	0.595224
165	3.63363	0.595224	3.63363	0.595224	3.63363	0.595224	3.63363	0.595224	3.63363	0.595224	3.63363	0.595224	3.63363	0.595224
166	3.65566	0.595224	3.65566	0.595224	3.65566	0.595224	3.65566	0.595224	3.65566	0.595224	3.65566	0.595224	3.65566	0.595224
167	3.67768	0.595224	3.67768	0.595224	3.67768	0.595224	3.67768	0.595224	3.67768	0.595224	3.67768	0.595224	3.67768	0.595224
168	3.6997	0.595224	3.6997	0.595224	3.6997	0.595224	3.6997	0.595224	3.6997	0.595224	3.6997	0.595224	3.6997	0.595224
169	3.72172	0.595224	3.72172	0.595224	3.72172	0.595224	3.72172	0.595224	3.72172	0.595224	3.72172	0.595224	3.72172	0.595224
170	3.74374	0.595224	3.74374	0.595224	3.74374	0.595224	3.74374	0.595224	3.74374	0.595224	3.74374	0.595224	3.74374	0.595224
171	3.76577	0.595224	3.76577	0.595224	3.76577	0.595224	3.76577	0.595224	3.76577	0.595224	3.76577	0.595224	3.76577	0.595224
172	3.78779	0.595224	3.78779	0.595224	3.78779	0.595224	3.78779	0.595224	3.78779	0.595224	3.78779	0.595224	3.78779	0.595224
173	3.80981	0.595224	3.80981	0.595224	3.80981	0.595224	3.80981	0.595224	3.80981	0.595224	3.80981	0.595224	3.80981	0.595224
174	3.83183	0.595224	3.83183	0.595224	3.83183	0.595224	3.83183	0.595224	3.83183	0.595224	3.83183	0.595224	3.83183	0.595224
175	3.85385	0.595224	3.85385	0.595224	3.85385	0.595224	3.85385	0.595224	3.85385	0.595224	3.85385	0.595224	3.85385	0.595224
176	3.87588	0.595224	3.87588	0.595224	3.87588	0.595224	3.87588	0.595224	3.87588	0.595224	3.87588	0.595224	3.87588	0.595224
177	3.8979	0.595224	3.8979	0.595224	3.8979	0.595224	3.8979	0.595224	3.8979	0.595224	3.8979	0.595224	3.8979	0.595224
178	3.91992	0.595224	3.91992	0.595224	3.91992	0.595224	3.91992	0.595224	3.91992	0.595224	3.91992	0.595224	3.91992	0.595224
179	3.94194	0.595224	3.94194	0.595224	3.94194	0.595224	3.94194	0.595224	3.94194	0.595224	3.94194	0.595224	3.94194	0.595224
180	3.96396	0.595224	3.96396	0.595224	3.96396	0.595224	3.96396	0.595224	3.96396	0.595224	3.96396	0.595224	3.96396	0.595224
181	3.98599	0.595224	3.98599	0.595224	3.98599	0.595224	3.98599	0.595224	3.98599	0.595224	3.98599	0.595224	3.98599	0.595224
182	4.00801	0.595224	4.00801	0.595224	4.00801	0.595224	4.00801	0.595224	4.00801	0.595224	4.00801	0.595224	4.00801	0.595224
183	4.03003	0.595224	4.03003	0.595224	4.03003	0.595224	4.03003	0.595224	4.03003	0.595224	4.03003	0.595224	4.03003	0.595224
184	4.05205	0.595224	4.05205	0.595224	4.05205	0.595224	4.05205	0.595224	4.05205	0.595224	4.05205	0.595224	4.05205	0.595224
185	4.07407	0.595224	4.07407	0.595224	4.07407	0.595224	4.07407	0.595224	4.07407	0.595224	4.07407	0.595224	4.07407	0.595224
186	4.0961	0.595224	4.0961	0.595224	4.0961	0.595224	4.0961	0.595224	4.0961	0.595224	4.0961	0.595224	4.0961	0.595224
187	4.11812	0.595224	4.11812	0.595224	4.11812	0.595224	4.11812	0.595224	4.11812	0.595224	4.11812	0.595224	4.11812	0.595224
188	4.14014	0.595224	4.14014	0.595224	4.14014	0.595224	4.14014	0.595224	4.14014	0.595224	4.14014	0.595224	4.14014	0.595224
189	4.16216	0.595224	4.16216	0.595224	4.16216	0.595224	4.16216	0.595224	4.16216	0.595224	4.16216	0.595224	4.16216	0.595224
190	4.18418	0.595224	4.18418	0.595224	4.18418	0.595224	4.18418	0.595224	4.18418	0.595224	4.18418	0.595224	4.18418	0.595224
191	4.20621	0.595224	4.20621	0.595224	4.20621	0.595224	4.20621	0.595224	4.20621	0.595224	4.20621	0.595224	4.20621	0.595224
192	4.22823	0.595224	4.22823	0.595224	4.22823	0.595224	4.22823	0.595224	4.22823	0.595224	4.22823	0.595224	4.22823	0.595224
193	4.25025	0.595224	4.25025	0.595224	4.25025	0.595224	4.25025	0.595224	4.25025	0.595224	4.25025	0.595224	4.25025	0.595224
194	4.27227	0.595224	4.27227	0.595224	4.27227	0.595224	4.27227	0.595224	4.27227	0.595224	4.27227	0.595224	4.27227	0.595224
195	4.29429	0.595224	4.29429	0.595224	4.29429	0.595224	4.29429	0.595224	4.29429	0.595224	4.29429	0.595224	4.29429	0.595224
196	4.31632	0.595224	4.31632	0.595224	4.31632	0.595224	4.31632	0.595224	4.31632	0.595224	4.31632	0.595224	4.31632	0.595224
197	4.33834	0.595224	4.33834	0.595224	4.33834	0.595224	4.33834	0.595224	4.33834	0.595224	4.33834	0.595224	4.33834	0.595224
198	4.36036	0.595224	4.36036	0.595224	4.36036	0.595224	4.36036	0.595224	4.36036	0.595224	4.36036	0.595224	4.36036	0.595224
199	4.38238	0.595224	4.38238	0.595224	4.38238	0.595224	4.38238	0.595224	4.38238	0.595224	4.38238	0.595224	4.38238	0.595224
200	4.4044	0.595224	4.4044	0.595224	4.4044	0.595224	4.4044	0.595224	4.4044	0.595224	4.4044	0.595224	4.4044	0.595224
201	4.42643	0.595224	4.42643	0.595224	4.42643	0.595224	4.42643	0.595224	4.42643	0.595224	4.42643	0.595224	4.42643	0.595224
202	4.44845	0.595224	4.44845	0.595224	4.44845	0.595224	4.44845	0.595224	4.44845	0.595224	4.44845	0.595224	4.44845	0.595224
203	4.47047	0.595224	4.47047	0.595224	4.47047	0.595224	4.47047	0.595224	4.47047	0.595224	4.47047	0.595224	4.47047	0.595224
204	4.49249	0.595224	4.49249	0.595224	4.49249	0.595224	4.49249	0.595224	4.49249	0.595224	4.49249	0.595224	4.49249	0.595224
205	4.51451	0.595224	4.51451	0.595224	4.51451	0.595224	4.51451	0.595224	4.51451	0.595224	4.51451	0.595224	4.51451	0.595224
206	4.53654	0.595224	4.53654	0.595224	4.53654	0.595224	4.53654	0.595224	4.53654	0.595224	4.53654	0.595224	4.53654	0.595224
207	4.55856	0.595224	4.55856	0.595224	4.55856	0.595224	4.55856	0.595224	4.55856	0.595224	4.55856	0.595224	4.55856	0.595224
208	4.58058	0.595224	4.58058	0.595224	4.58058	0.595224	4.58058	0.595224	4.58058	0.595224	4.58058	0.595224	4.58058	0.595224
209	4.6026	0.595224	4.6026	0.595224	4.6026	0.595224	4.6026	0.595224	4.6026	0.595224	4.6026	0.595224	4.6026	0.595224
210	4.62462	0.595224	4.62462	0.595224	4.62462	0.595224	4.62462	0.595224	4.62462	0.595224	4.62462	0.595224	4.62462	0.595224
211	4.64665	0.595224	4.64665	0.595224	4.64665	0.595224	4.64665	0.595224	4.64665	0.595224	4.64665	0.595224	4.64665	0.595224
212	4.66867	0.595224	4.66867	0.595224	4.66867	0.595224	4.66867	0.595224	4.66867	0.595224	4.66867	0.595224	4.66867	0.595224
213	4.69069	0.595224	4.69069	0.595224	4.69069	0.595224	4.69069	0.595224	4.69069	0.595224	4.69069	0.595224	4.69069	0.595224
214	4.71271	0.595224	4.71271	0.595224	4.71271	0.595224	4.71271	0.595224	4.71271	0.595224	4.71271	0.595224	4.71271	0.595224
215	4.73473	0.595224	4.73473	0.595224	4.73473	0.595224	4.73473	0.595224	4.73473	0.595224	4.73473	0.595224	4.73473	0.595224
216	4.75676	0.595224	4.75676	0.595224	4.75676	0.595224	4.75676	0.595224	4.75676	0.595224	4.75676	0.595224	4.75676	0.595224
217	4.77878	0.595224	4.77878	0.595224	4.77878	0.595224	4.77878	0.595224	4.77878	0.595224	4.77878	0.595224	4.77878	0.595224
218	4.8008	0.595224	4.8008	0.595224	4.8008	0.595224	4.8008	0.595224	4.8008	0.595224	4.8008	0.595224	4.8008	0.595224
219	4.82282	0.595224	4.82282	0.595224	4.82282	0.595224	4.82282	0.595224	4.82282	0.595224	4.82282	0.595224	4.82282	0.595224
220	4.84484	0.595224	4.84484	0.595224	4.84484	0.595224	4.84484	0.595224	4.84484	0.595224	4.84484	0.595224	4.84484	0.595224
221	4.86687	0.595224	4.86687	0.595224	4.86687	0.595224	4.86687	0.595224	4.86687	0.595224	4.86687	0.595224	4.86687	0.595224
222	4.88889	0.595224	4.88889	0.595224	4.88889	0.595224	4.88889	0.595224	4.88889	0.595224	4.88889	0.595224	4.88889	0.595224
223	4.91091	0.595224	4.91091	0.595224	4.91091	0.595224	4.91091	0.595224	4.91091	0.595224	4.91091	0.595224	4.91091	0.595224
224	4.93293	0.595224	4.93293	0.595224	4.93293	0.595224	4.93293	0.595224	4.93293	0.595224	4.93293	0.595224	4.93293	0.595224
225	4.95495	0.595224	4.95495	0.595224	4.95495	0.595224	4.95495	0.595224	4.95495	0.595224	4.95495	0.595224	4.95495	0.595224
226	4.97698	0.595224	4.97698	0.595224	4.97698	0.595224	4.97698	0.595224	4.97698	0.595224	4.97698	0.595224	4.97698	0.595224
227	4.999	0.595224	4.999	0.595224	4.999	0.595224	4.999	0.595224	4.999	0.595224	4.999	0.595224	4.999	0.595224
228	5.02102	0.595224	5.02102	0.595224	5.02102	0.595224	5.02102	0.595224	5.02102	0.595224	5.02102	0.595224	5.02102	0.595224
229	5.04304	0.595224	5.04304	0.595224	5.04304	0.595224	5.04304	0.595224	5.04304	0.595224	5.04304	0.595224	5.04304	0.595224
230	5.06507	0.595224	5.06507	0.595224	5.06507	0.595224	5.06507	0.595224	5.06507	0.595224	5.06507	0.595224	5.06507	0.595224
231	5.08709	0.595224	5.08709	0.595224	5.08709	0.595224	5.08709	0.595224	5.08709	0.595224	5.08709	0.595224	5.08709	0.595224
232	5.10911	0.595224	5.10911	0.595224	5.10911	0.595224	5.10911	0.595224	5.10911	0.595224	5.10911	0.595224	5.10911	0.595224
233	5.13113	0.595224	5.13113	0.595224	5.13113	0.595224	5.13113	0.595224	5.13113	0.595224	5.13113	0.595224	5.13113	0.595224
234	5.15315	0.595224	5.15315	0.595224	5.15315	0.595224	5.15315	0.595224	5.15315	0.595224	5.15315	0.595224	5.15315	0.595224
235	5.17518	0.595224	5.17518	0.595224	5.17518	0.595224	5.17518	0.595224	5.17518	0.595224	5.17518	0.595224	5.17518	0.595224
236	5.1972	0.595224	5.1972	0.595224	5.1972	0.595224	5.1972	0.595224	5.1972	0.595224	5.1972	0.595224	5.1972	0.595224
237	5.21922	0.595224	5.21922	0.595224	5.21922	0.595224	5.21922	0.595224	5.21922	0.595224	5.21922	0.595224	5.21922	0.595224
238	5.24124	0.595224	5.24124	0.595224	5.24124	0.595224	5.24124	0.595224	5.24124	0.595224	5.24124	0.595224	5.24124	0.595224
239	5.26326	0.595224	5.26326	0.595224	5.26326	0.595224	5.26326	0.595224	5.26326	0.595224	5.26326	0.595224	5.26326	0.595224
240	5.28529	0.595224	5.28529	0.595224	5.28529	0.595224	5.28529	0.595224	5.28529	0.595224	5.28529	0.595224	5.28529	0.595224
241	5.30731	0.595224	5.30731	0.595224	5.30731	0.595224	5.30731	0.595224	5.30731	0.595224	5.30731	0.595224	5.30731	0.595224
242	5.32933	0.595224	5.32933	0.595224	5.32933	0.595224	5.32933	0.595224	5.32933	0.595224	5.32933	0.595224	5.32933	0.595224
243	5.35135	0.595224	5.35135	0.595224	5.35135	0.595224	5.35135	0.595224	5.35135	0.595224	5.35135	0.595224	5.35135	0.595224
244	5.37337	0.595224	5.37337	0.595224	5.37337	0.595224	5.37337	0.595224	5.37337	0.595224	5.37337	0.595224	5.37337	0.595224
245	5.3954	0.595224	5.3954	0.595224	5.3954	0.595224	5.3954	0.595224	5.3954	0.595224	5.3954	0.595224	5.3954	0.595224
246	5.41742	0.595224	5.41742	0.595224	5.41742	0.595224	5.41742	0.595224	5.41742	0.595224	5.41742	0.595224	5.41742	0.595224
247	5.43944	0.595224	5.43944	0.595224	5.43944	0.595224	5.43944	0.595224	5.43944	0.595224	5.43944	0.595224	5.43944	0.595224
248	5.46146	0.595224	5.46146	0.595224	5.46146	0.595224	5.46146	0.595224	5.46146	0.595224	5.46146	0.595224	5.46146	0.595224
249	5.48348	0.595224	5.48348	0.595224	5.48348	0.595224	5.48348	0.595224	5.48348	0.595224	5.48348	0.595224	5.48348	0.595224
250	5.50551	0.595224	5.50551	0.595224	5.50551	0.595224	5.50551	0.595224	5.50551	0.595224	5.50551	0.595224	5.50551	0.595224
251	5.52753	0.595224	5.52753	0.595224	5.52753	0.595224	5.52753	0.595224	5.52753	0.595224	5.52753	0.595224	5.52753	0.595224
252	5.54955	0.595224	5.54955	0.595224	5.54955	0.595224	5.54955	0.595224	5.54955	0.595224	5.54955	0.595224	5.54955	0.595224
253	5.57157	0.595224	5.57157	0.595224	5.57157	0.595224	5.57157	0.595224	5.57157	0.595224	5.57157	0.595224	5.57157	0.595224
254	5.59359	0.595224	5.59359	0.595224	5.59359	0.595224	5.59359	0.595224	5.59359	0.595224	5.59359	0.595224	5.59359	0.595224
255	5.61562	0.595224	5.61562	0.595224	5.61562	0.595224	5.61562	0.595224	5.61562	0.595224	5.61562	0.595224	5.61562	0.595224
256	5.63764	0.595224	5.63764	0.595224	5.63764	0.595224	5.63764	0.595224	5.63764	0.595224	5.63764	0.595224	5.63764	0.595224
257	5.65966	0.595224	5.65966	0.595224	5.65966	0.595224	5.65966	0.595224	5.65966	0.595224	5.65966	0.595224	5.65966	0.595224
258	5.68168	0.595224	5.68168	0.595224	5.68168	0.595224	5.68168	0.595224	5.68168	0.595224	5.68168	0.595224	5.68168	0.595224
259	5.7037	0.595224	5.7037	0.595224	5.7037	0.595224	5.7037	0.595224	5.7037	0.595224	5.7037	0.595224	5.7037	0.595224
260	5.72573	0.595224	5.72573	0.595224	5.72573	0.595224	5.72573	0.595224	5.72573	0.595224	5.72573	0.595224	5.72573	0.595224
261	5.74775	0.595224	5.74775	0.595224	5.74775	0.595224	5.74775	0.595224	5.74775	0.595224	5.74775	0.595224	5.74775	0.595224
262	5.76977	0.595224	5.76977	0.595224	5.76977	0.595224	5.76977	0.595224	5.76977	0.595224	5.76977	0.595224	5.76977	0.595224
263	5.79179	0.595224	5.79179	0.595224	5.79179	0.595224	5.79179	0.595224	5.79179	0.595224	5.79179	0.595224	5.79179	0.595224
264	5.81381	0.595224	5.81381	0.595224	5.81381	0.595224	5.81381	0.595224	5.81381	0.595224	5.81381	0.595224	5.81381	0.595224
265	5.83584	0.595224	5.83584	0.595224	5.83584	0.595224	5.83584	0.595224	5.83584	0.595224	5.83584	0.595224	5.83584	0.595224
266	5.85786	0.595224	5.85786	0.595224	5.85786	0.595224	5.85786	0.595224	5.85786	0.595224	5.85786	0.595224	5.85786	0.595224
267	5.87988	0.595224	5.87988	0.595224	5.87988	0.595224	5.87988	0.595224	5.87988	0.595224	5.87988	0.595224	5.87988	0.595224
268	5.9019	0.595224	5.9019	0.595224	5.9019	0.595224	5.9019	0.595224	5.9019	0.595224	5.9019	0.595224	5.9019	0.595224
269	5.92392	0.595224	5.92392	0.595224	5.92392	0.595224	5.92392	0.595224	5.92392	0.595224	5.92392	0.595224	5.92392	0.595224
270	5.94595	0.595224	5.94595	0.595224	5.94595	0.595224	5.94595	0.595224	5.94595	0.595224	5.94595	0.595224	5.94595	0.595224
271	5.96797	0.595224	5.96797	0.595224	5.96797	0.595224	5.96797	0.595224	5.96797	0.595224	5.96797	0.595224	5.96797	0.595224
272	5.98999	0.595224	5.98999	0.595224	5.98999	0.595224	5.98999	0.595224	5.98999	0.595224	5.98999	0.595224	5.98999	0.595224
273	6.01201	0.595224	6.01201	0.595224	6.01201	0.595224	6.01201	0.595224	6.01201	0.595224	6.01201	0.595224	6.01201	0.595224
274	6.03403	0.595224	6.03403	0.595224	6.03403	0.595224	6.03403	0.595224	6.03403	0.595224	6.03403	0.595224	6.03403	0.595224
275	6.05606	0.595224	6.05606	0.595224	6.05606	0.595224	6.05606	0.595224	6.05606	0.595224	6.05606	0.595224	6.05606	0.595224
276	6.07808	0.595224	6.07808	0.595224	6.07808	0.595224	6.07808	0.595224	6.07808	0.595224	6.07808	0.595224	6.07808	0.595224
277	6.1001	0.595224	6.1001	0.595224	6.1001	0.595224	6.1001	0.595224	6.1001	0.595224	6.1001	0.595224	6.1001	0.595224
278	6.12212	0.595224	6.12212	0.595224	6.12212	0.595224	6.12212	0.595224	6.12212	0.595224	6.12212	0.595224	6.12212	0.595224
279	6.14414	0.595224	6.14414	0.595224	6.14414	0.595224	6.14414	0.595224	6.14414	0.595224	6.14414	0.595224	6.14414	0.595224
280	6.16617	0.595224	6.16617	0.595224	6.16617	0.595224	6.16617	0.595224	6.16617	0.595224	6.16617	0.595224	6.16617	0.595224
281	6.18819	0.595224	6.18819	0.595224	6.18819	0.595224	6.18819	0.595224	6.18819	0.595224	6.18819	0.595224	6.18819	0.595224
282	6.21021	0.595224	6.21021	0.595224	6.21021	0.595224	6.21021	0.595224	6.21021	0.595224	6.21021	0.595224	6.21021	0.595224
283	6.23223	0.595224	6.23223	0.595224	6.23223	0.595224	6.23223	0.595224	6.23223	0.595224	6.23223	0.595224	6.23223	0.595224
284	6.25425	0.595224	6.25425	0.595224	6.25425	0.595224	6.25425	0.595224	6.25425	0.595224	6.25425	0.595224	6.25425	0.595224
285	6.27628	0.595224	6.27628	0.595224	6.27628	0.595224	6.27628	0.595224	6.27628	0.595224	6.27628	0.595224	6.27628	0.595224
286	6.2983	0.595224	6.2983	0.595224	6.2983	0.595224	6.2983	0.595224	6.2983	0.595224	6.2983	0.595224	6.2983	0.595224
287	6.32032	0.595224	6.32032	0.595224	6.32032	0.595224	6.32032	0.595224	6.32032	0.595224	6.32032	0.595224	6.32032	0.595224
288	6.34234	0.595224	6.34234	0.595224	6.34234	0.595224	6.34234	0.595224	6.34234	0.595224	6.34234	0.595224	6.34234	0.595224
289	6.36436	0.595224	6.36436	0.595224	6.36436	0.595224	6.36436	0.595224	6.36436	0.595224	6.36436	0.595224	6.36436	0.595224
290	6.38639	0.595224	6.38639	0.595224	6.38639	0.595224	6.38639	0.595224	6.38639	0.595224	6.38639	0.595224	6.38639	0.595224
291	6.40841	0.595224	6.40841	0.595224	6.40841	0.595224	6.40841	0.595224	6.40841	0.595224	6.40841	0.595224	6.40841	0.595224
292	6.43043	0.595224	6.43043	0.595224	6.43043	0.595224	6.43043	0.595224	6.43043	0.595224	6.43043	0.595224	6.43043	0.595224
293	6.45245	0.595224	6.45245	0.595224	6.45245	0.595224	6.45245	0.595224	6.45245	0.595224	6.45245	0.595224	6.45245	0.595224
294	6.47447	0.595224	6.47447	0.595224	6.47447	0.595224	6.47447	0.595224	6.47447	0.595224	6.47447	0.595224	6.47447	0.595224
295	6.4965	0.595224	6.4965	0.595224	6.4965	0.595224	6.4965	0.595224	6.4965	0.595224	6.4965	0.595224	6.4965	0.595224
296	6.51852	0.595224	6.51852	0.595224	6.51852	0.595224	6.51852	0.595224	6.51852	0.595224	6.51852	0.595224	6.51852	0.595224
297	6.54054	0.595224	6.54054	0.595224	6.54054	0.595224	6.54054	0.595224	6.54054	0.595224	6.54054	0.595224	6.54054	0.595224
298	6.56256	0.595224	6.56256	0.595224	6.56256	0.595224	6.56256	0.595224	6.56256	0.595224	6.56256	0.595224	6.56256	0.595224
299	6.58458	0.595224	6.58458	0.595224	6.58458	0.595224	6.58458	0.595224	6.58458	0.595224	6.58458	0.595224	6.58458	0.595224
300	6.60661	0.595224	6.60661	0.595224	6.60661	0.595224	6.60661	0.595224	6.60661	0.595224	6.60661	0.595224	6.60661	0.595224
301	6.62863	0.595224	6.62863	0.595224	6.62863	0.595224	6.62863	0.595224	6.62863	0.595224	6.62863	0.595224	6.62863	0.595224
302	6.65065	0.595224	6.65065	0.595224	6.65065	0.595224	6.65065	0.595224	6.65065	0.595224	6.65065	0.595224	6.65065	0.595224
303	6.67267	0.595224	6.67267	0.595224	6.67267	0.595224	6.67267	0.595224	6.67267	0.595224	6.67267	0.595224	6.67267	0.595224
304	6.69469	0.595224	6.69469	0.595224	6.69469	0.595224	6.69469	0.595224	6.69469	0.595224	6.69469	0.595224	6.69469	0.595224
305	6.71672	0.595224	6.71672	0.595224	6.71672	0.595224	6.71672	0.595224	6.71672	0.595224	6.71672	0.595224	6.71672	0.595224
306	6.73874	0.595224	6.73874	0.595224	6.73874	0.595224	6.73874	0.595224	6.73874	0.595224	6.73874	0.595224	6.73874	0.595224
307	6.76076	0.595224	6.76076	0.595224	6.76076	0.595224	6.76076	0.595224	6.76076	0.595224	6.76076	0.595224	6.76076	0.595224
308	6.78278	0.595224	6.78278	0.595224	6.78278	0.595224	6.78278	0.595224	6.78278	0.595224	6.78278	0.595224	6.78278	0.595224
309	6.8048	0.595224	6.8048	0.595224	6.8048	0.595224	6.8048	0.595224	6.8048	0.595224	6.8048	0.595224	6.8048	0.595224
310	6.82683	0.595224	6.82683	0.595224	6.82683	0.595224	6.82683	0.595224	6.82683	0.595224	6.82683	0.595224	6.82683	0.595224
311	6.84885	0.595224	6.84885	0.595224	6.84885	0.595224	6.84885	0.595224	6.84885	0.595224	6.84885	0.595224	6.84885	0.595224
312	6.87087	0.595224	6.87087	0.595224	6.87087	0.595224	6.87087	0.595224	6.87087	0.595224	6.87087	0.595224	6.87087	0.595224
313	6.89289	0.595224	6.89289	0.595224	6.89289	0.595224	6.89289	0.595224	6.89289	0.595224	6.89289	0.595224	6.89289	0.595224
314	6.91491	0.595224	6.91491	0.595224	6.91491	0.595224	6.91491	0.595224	6.91491	0.595224	6.91491	0.595224	6.91491	0.595224
315	6.93694	0.595224	6.93694	0.595224	6.93694	0.595224	6.93694	0.595224	6.93694	0.595224	6.93694	0.595224	6.93694	0.595224
316	6.95896	0.595224	6.95896	0.595224	6.95896	0.595224	6.95896	0.595224	6.95896	0.595224	6.95896	0.595224	6.95896	0.595224
317	6.98098	0.595224	6.98098	0.595224	6.98098	0.595224	6.98098	0.595224	6.98098	0.595224	6.98098	0.595224	6.98098	0.595224
318	7.003	0.595224	7.003	0.595224	7.003	0.595224	7.003	0.595224	7.003	0.595224	7.003	0.595224	7.003	0.595224
319	7.02503	0.595224	7.02503	0.595224	7.02503	0.595224	7.02503	0.595224	7.02503	0.595224	7.02503	0.595224	7.02503	0.595224
320	7.04705	0.595224	7.04705	0.595224	7.04705	0.595224	7.04705	0.595224	7.04705	0.595224	7.04705	0.595224	7.04705	0.595224
321	7.06907	0.595224	7.06907	0.595224	7.06907	0.595224	7.06907	0.595224	7.06907	0.595224	7.06907	0.595224	7.06907	0.595224
322	7.09109	0.595224	7.09109	0.595224	7.09109	0.595224	7.09109	0.595224	7.09109	0.595224	7.09109	0.595224	7.09109	0.595224
323	7.11311	0.595224	7.11311	0.595224	7.11311	0.595224	7.11311	0.595224	7.11311	0.595224	7.11311	0.595224	7.11311	0.595224
324	7.13514	0.595224	7.13514	0.595224	7.13514	0.595224	7.13514	0.595224	7.13514	0.595224	7.13514	0.595224	7.13514	0.595224
325	7.15716	0.595224	7.15716	0.595224	7.15716	0.595224	7.15716	0.595224	7.15716	0.595224	7.15716	0.595224	7.15716	0.595224
326	7.17918	0.595224	7.17918	0.595224	7.17918	0.595224	7.17918	0.595224	7.17918	0.595224	7.17918	0.595224	7.17918	0.595224
327	7.2012	0.595224	7.2012	0.595224	7.2012	0.595224	7.2012	0.595224	7.2012	0.595224	7.2012	0.595224	7.2012	0.595224
328	7.22322	0.595224	7.22322	0.595224	7.22322	0.595224	7.22322	0.595224	7.22322	0.595224	7.22322	0.595224	7.22322	0.595224
329	7.24525	0.595224	7.24525	0.595224	7.24525	0.595224	7.24525	0.595224	7.24525	0.595224	7.24525	0.595224	7.24525	0.595224
330	7.26727	0.595224	7.26727	0.595224	7.26727	0.595224	7.26727	0.595224	7.26727	0.595224	7.26727	0.595224	7.26727	0.595224
331	7.28929	0.595224	7.28929	0.595224	7.28929	0.595224	7.28929	0.595224	7.28929	0.595224	7.28929	0.595224	7.28929	0.595224
332	7.31131	0.595224	7.31131	0.595224	7.31131	0.595224	7.31131	0.595224	7.31131	0.595224	7.31131	0.595224	7.31131	0.595224
333	7.33333	0.595224	7.33333	0.595224	7.33333	0.595224	7.33333	0.595224	7.33333	0.595224	7.33333	0.595224	7.33333	0.595224
334	7.35536	0.595224	7.35536	0.595224	7.35536	0.595224	7.35536	0.595224	7.35536	0.595224	7.35536	0.595224	7.35536	0.595224
335	7.37738	0.595224	7.37738	0.595224	7.37738	0.595224	7.37738	0.595224	7.37738	0.595224	7.37738	0.595224	7.37738	0.595224
336	7.3994	0.595224	7.3994	0.595224	7.3994	0.595224	7.3994	0.595224	7.3994	0.595224	7.3994	0.595224	7.3994	0.595224
337	7.42142	0.595224	7.42142	0.595224	7.42142	0.595224	7.42142	0.595224	7.42142	0.595224	7.42142	0.595224	7.42142	0.595224
338	7.44344	0.595224	7.44344	0.595224	7.44344	0.595224	7.44344	0.595224	7.44344	0.595224	7.44344	0.595224	7.44344	0.595224
339	7.46547	0.595224	7.46547	0.595224	7.46547	0.595224	7.46547	0.595224	7.46547	0.595224	7.46547	0.595224	7.46547	0.595224
340	7.48749	0.595224	7.48749	0.595224	7.48749	0.595224	7.48749	0.595224	7.48749	0.595224	7.48749	0.595224	7.48749	0.595224
341	7.50951	0.595224	7.50951	0.595224	7.50951	0.595224	7.50951	0.595224	7.50951	0.595224	7.50951	0.595224	7.50951	0.595224
342	7.53153	0.595224	7.53153	0.595224	7.53153	0.595224	7.53153	0.595224	7.53153	0.595224	7.53153	0.595224	7.53153	0.595224
343	7.55355	0.595224	7.55355	0.595224	7.55355	0.595224	7.55355	0.595224	7.55355	0.595224	7.55355	0.595224	7.55355	0.595224
344	7.57558	0.595224	7.57558	0.595224	7.57558	0.595224	7.57558	0.595224	7.57558	0.595224	7.57558	0.595224	7.57558	0.595224
345	7.5976	0.595224	7.5976	0.595224	7.5976	0.595224	7.5976	0.595224	7.5976	0.595224	7.5976	0.595224	7.5976	0.595224
346	7.61962	0.595224	7.61962	0.595224	7.61962	0.595224	7.61962	0.595224	7.61962	0.595224	7.61962	0.595224	7.61962	0.595224
347	7.64164	0.595224	7.64164	0.595224	7.64164	0.595224	7.64164	0.595224	7.64164	0.595224	7.64164	0.595224	7.64164	0.595224
348	7.66366	0.595224	7.66366	0.595224	7.66366	0.595224	7.66366	0.595224	7.66366	0.595224	7.66366	0.595224	7.66366	0.595224
349	7.68569	0.595224	7.68569	0.595224	7.68569	0.595224	7.68569	0.595224	7.68569	0.595224	7.68569	0.595224	7.68569	0.595224
350	7.70771	0.595224	7.70771	0.595224	7.70771	0.595224	7.70771	0.595224	7.70771	0.595224	7.70771	0.595224	7.70771	0.595224
351	7.72973	0.595224	7.72973	0.595224	7.72973	0.595224	7.72973	0.595224	7.72973	0.595224	7.72973	0.595224	7.72973	0.595224
352	7.75175	0.595224	7.75175	0.595224	7.75175	0.595224	7.75175	0.595224	7.75175	0.595224	7.75175	0.595224	7.75175	0.595224
353	7.77377	0.595224	7.77377	0.595224	7.77377	0.595224	7.77377	0.595224	7.77377	0.595224	7.77377	0.595224	7.77377	0.595224
354	7.7958	0.595224	7.7958	0.595224	7.7958	0.595224	7.7958	0.595224	7.7958	0.595224	7.7958	0.595224	7.7958	0.595224
355	7.81782	0.595224	7.81782	0.595224	7.81782	0.595224	7.81782	0.595224	7.81782	0.595224	7.81782	0.595224	7.81782	0.595224
356	7.83984	0.595224	7.83984	0.595224	7.83984	0.595224	7.83984	0.595224	7.83984	0.595224	7.83984	0.595224	7.83984	0.595224
357	7.86186	0.595224	7.86186	0.595224	7.86186	0.595224	7.86186	0.595224	7.86186	0.595224	7.86186	0.595224	7.86186	0.595224
358	7.88388	0.595224	7.88388	0.595224	7.88388	0.595224	7.88388	0.595224	7.88388	0.595224	7.88388	0.595224	7.88388	0.595224
359	7.90591	0.595224	7.90591	0.595224	7.90591	0.595224	7.90591	0.595224	7.90591	0.595224	7.90591	0.595224	7.90591	0.595224
360	7.92793	0.595224	7.92793	0.595224	7.92793	0.595224	7.92793	0.595224	7.92793	0.595224	7.92793	0.595224	7.92793	0.595224
361	7.94995	0.595224	7.94995	0.595224	7.94995	0.595224	7.94995	0.595224	7.94995	0.595224	7.94995	0.595224	7.94995	0.595224
362	7.97197	0.595224	7.97197	0.595224	7.97197	0.595224	7.97197	0.595224	7.97197	0.595224	7.97197	0.595224	7.97197	0.595224
363	7.99399	0.595224	7.99399	0.595224	7.99399	0.595224	7.99399	0.595224	7.99399	0.595224	7.99399	0.595224	7.99399	0.595224
364	8.01602	0.595224	8.01602	0.595224	8.01602	0.595224	8.01602	0.595224	8.01602	0.595224	8.01602	0.595224	8.01602	0.595224
365	8.03804	0.595224	8.03804	0.595224	8.03804	0.595224	8.03804	0.595224	8.03804	0.595224	8.03804	0.595224	8.03804	0.595224
366	8.06006	0.595224	8.06006	0.595224	8.06006	0.595224	8.06006	0.595224	8.06006	0.595224	8.06006	0.595224	8.06006	0.595224
367	8.08208	0.595224	8.08208	0.595224	8.08208	0.595224	8.08208	0.595224	8.08208	0.595224	8.08208	0.595224	8.08208	0.595224
368	8.1041	0.595224	8.1041	0.595224	8.1041	0.595224	8.1041	0.595224	8.1041	0.595224	8.1041	0.595224	8.1041	0.595224
369	8.12613	0.595224	8.12613	0.595224	8.12613	0.595224	8.12613	0.595224	8.12613	0.595224	8.12613	0.595224	8.12613	0.595224
370	8.14815	0.595224	8.14815	0.595224	8.14815	0.595224	8.14815	0.595224	8.14815	0.595224	8.14815	0.595224	8.14815	0.595224
371	8.17017	0.595224	8.17017	0.595224	8.17017	0.595224	8.17017	0.595224	8.17017	0.595224	8.17017	0.595224	8.17017	0.595224
372	8.19219	0.595224	8.19219	0.595224	8.19219	0.595224	8.19219	0.595224	8.19219	0.595224	8.19219	0.595224	8.19219	0.595224
373	8.21421	0.595224	8.21421	0.595224	8.21421	0.595224	8.21421	0.595224	8.21421	0.595224	8.21421	0.595224	8.21421	0.595224
374	8.23624	0.595224	8.23624	0.595224	8.23624	0.595224	8.23624	0.595224	8.23624	0.595224	8.23624	0.595224	8.23624	0.595224
375	8.25826	0.595224	8.25826	0.595224	8.25826	0.595224	8.25826	0.595224	8.25826	0.595224	8.25826	0.595224	8.25826	0.595224
376	8.28028	0.595224	8.28028	0.595224	8.28028	0.595224	8.28028	0.595224	8.28028	0.595224	8.28028	0.595224	8.28028	0.595224
377	8.3023	0.595224	8.3023	0.595224	8.3023	0.595224	8.3023	0.595224	8.3023	0.595224	8.3023	0.595224	8.3023	0.595224
378	8.32432	0.595224	8.32432	0.595224	8.32432	0.595224	8.32432	0.595224	8.32432	0.595224	8.32432	0.595224	8.32432	0.595224
379	8.34635	0.595224	8.34635	0.595224	8.34635	0.595224	8.34635	0.595224	8.34635	0.595224	8.34635	0.595224	8.34635	0.595224
380	8.36837	0.595224	8.36837	0.595224	8.36837	0.595224	8.36837	0.595224	8.36837	0.595224	8.36837	0.595224	8.36837	0.595224
381	8.39039	0.595224	8.39039	0.595224	8.39039	0.595224	8.39039	0.595224	8.39039	0.595224	8.39039	0.595224	8.39039	0.595224
382	8.41241	0.595224	8.41241	0.595224	8.41241	0.595224	8.41241	0.595224	8.41241	0.595224	8.41241	0.595224	8.41241	0.595224
383	8.43443	0.595224	8.43443	0.595224	8.43443	0.595224	8.43443	0.595224	8.43443	0.595224	8.43443	0.595224	8.43443	0.595224
384	8.45646	0.595224	8.45646	0.595224	8.45646	0.595224	8.45646	0.595224	8.45646	0.595224	8.45646	0.595224	8.45646	0.595224
385	8.47848	0.595224	8.47848	0.595224	8.47848	0.595224	8.47848	0.595224	8.47848	0.595224	8.47848	0.595224	8.47848	0.595224
386	8.5005	0.595224	8.5005	0.595224	8.5005	0.595224	8.5005	0.595224	8.5005	0.595224	8.5005	0.595224	8.5005	0.595224
387	8.52252	0.595224	8.52252	0.595224	8.52252	0.595224	8.52252	0.595224	8.52252	0.595224	8.52252	0.595224	8.52252	0.595224
388	8.54454	0.595224	8.54454	0.595224	8.54454	0.595224	8.54454	0.595224	8.54454	0.595224	8.54454	0.595224	8.54454	0.595224
389	8.56657	0.595224	8.56657	0.595224	8.56657	0.595224	8.56657	0.595224	8.56657	0.595224	8.56657	0.595224	8.56657	0.595224
390	8.58859	0.595224	8.58859	0.595224	8.58859	0.595224	8.58859	0.595224	8.58859	0.595224	8.58859	0.595224	8.58859	0.595224
391	8.61061	0.595224	8.61061	0.595224	8.61061	0.595224	8.61061	0.595224	8.61061	0.595224	8.61061	0.595224	8.61061	0.595224
392	8.63263	0.595224	8.63263	0.595224	8.63263	0.595224	8.63263	0.595224	8.63263	0.595224	8.63263	0.595224	8.63263	0.595224
393	8.65465	0.595224	8.65465	0.595224	8.65465	0.595224	8.65465	0.595224	8.65465	0.595224	8.65465	0.595224	8.65465	0.595224
394	8.67668	0.595224	8.67668	0.595224	8.67668	0.595224	8.67668	0.595224	8.67668	0.595224	8.67668	0.595224	8.67668	0.595224
395	8.6987	0.595224	8.6987	0.595224	8.6987	0.595224	8.6987	0.595224	8.6987	0.595224	8.6987	0.595224	8.6987	0.595224
396	8.72072	0.595224	8.72072	0.595224	8.72072	0.595224	8.72072	0.595224	8.72072	0.595224	8.72072	0.595224	8.72072	0.595224
397	8.74274	0.595224	8.74274	0.595224	8.74274	0.595224	8.74274	0.595224	8.74274	0.595224	8.74274	0.595224	8.74274	0.595224
398	8.76476	0.595224	8.76476	0.595224	8.76476	0.595224	8.76476	0.595224	8.76476	0.595224	8.76476	0.595224	8.76476	0.595224
399	8.78679	0.595224	8.78679	0.595224	8.78679	0.595224	8.78679	0.595224	8.78679	0.595224	8.78679	0.595224	8.78679	0.595224
400	8.80881	0.595224	8.80881	0.595224	8.80881	0.595224	8.80881	0.595224	8.80881	0.595224	8.80881	0.595224	8.80881	0.595224
401	8.83083	0.595224	8.83083	0.595224	8.83083	0.595224	8.83083	0.595224	8.83083	0.595224	8.83083	0.595224	8.83083	0.595224
402	8.85285	0.595224	8.85285	0.595224	8.85285	0.595224	8.85285	0.595224	8.85285	0.595224	8.85285	0.595224	8.85285	0.595224
403	8.87487	0.595224	8.87487	0.595224	8.87487	0.595224	8.87487	0.595224	8.87487	0.595224	8.87487	0.595224	8.87487	0.595224
404	8.8969	0.595224	8.8969	0.595224	8.8969	0.595224	8.8969	0.595224	8.8969	0.595224	8.8969	0.595224	8.8969	0.595224
405	0.11011	0.583055	0.11011	0.583055	0.11011	0.583055	0.11011	0.583055	0.11011	0.583055	0.11011	0.583055	0.11011	0.583055
406	8.91892	0.558303	8.91892	0.558303	8.91892	0.558303	8.91892	0.558303	8.91892	0.558303	8.91892	0.558303	8.91892	0.558303
407	8.94094	0.558303	8.94094	0.558303	8.94094	0.558303	8.94094	0.558303	8.94094	0.558303	8.94094	0.558303	8.94094	0.558303
408	8.96296	0.558303	8.96296	0.558303	8.96296	0.558303	8.96296	0.558303	8.96296	0.558303	8.96296	0.558303	8.96296	0.558303
409	8.98498	0.558303	8.98498	0.558303	8.98498	0.558303	8.98498	0.558303	8.98498	0.558303	8.98498	0.558303	8.98498	0.558303
410	9.00701	0.558303	9.00701	0.558303	9.00701	0.558303	9.00701	0.558303	9.00701	0.558303	9.00701	0.558303	9.00701	0.558303
411	9.02903	0.558303	9.02903	0.558303	9.02903	0.558303	9.02903	0.558303	9.02903	0.558303	9.02903	0.558303	9.02903	0.558303
412	9.05105	0.558303	9.05105	0.558303	9.05105	0.558303	9.05105	0.558303	9.05105	0.558303	9.05105	0.558303	9.05105	0.558303
413	9.07307	0.558303	9.07307	0.558303	9.07307	0.558303	9.07307	0.558303	9.07307	0.558303	9.07307	0.558303	9.07307	0.558303
414	9.0951	0.558303	9.0951	0.558303	9.0951	0.558303	9.0951	0.558303	9.0951	0.558303	9.0951	0.558303	9.0951	0.558303
415	9.11712	0.558303	9.11712	0.558303	9.11712	0.558303	9.11712	0.558303	9.11712	0.558303	9.11712	0.558303	9.11712	0.558303
416	9.13914	0.558303	9.13914	0.558303	9.13914	0.558303	9.13914	0.558303	9.13914	0.558303	9.13914	0.558303	9.13914	0.558303
417	9.16116	0.558303	9.16116	0.558303	9.16116	0.558303	9.16116	0.558303	9.16116	0.558303	9.16116	0.558303	9.16116	0.558303
418	9.18318	0.558303	9.18318	0.558303	9.18318	0.558303	9.18318	0.558303	9.18318	0.558303	9.18318	0.558303	9.18318	0.558303
419	9.20521	0.558303	9.20521	0.558303	9.20521	0.558303	9.20521	0.558303	9.20521	0.558303	9.20521	0.558303	9.20521	0.558303
420	9.22723	0.558303	9.22723	0.558303	9.22723	0.558303	9.22723	0.558303	9.22723	0.558303	9.22723	0.558303	9.22723	0.558303
421	9.24925	0.558303	9.24925	0.558303	9.24925	0.558303	9.24925	0.558303	9.24925	0.558303	9.24925	0.558303	9.24925	0.558303
422	9.27127	0.558303	9.27127	0.558303	9.27127	0.558303	9.27127	0.558303	9.27127	0.558303	9.27127	0.558303	9.27127	0.558303
423	9.29329	0.558303	9.29329	0.558303	9.29329	0.558303	9.29329	0.558303	9.29329	0.558303	9.29329	0.558303	9.29329	0.558303
424	9.31532	0.558303	9.31532	0.558303	9.31532	0.558303	9.31532	0.558303	9.31532	0.558303	9.31532	0.558303	9.31532	0.558303
425	9.33734	0.558303	9.33734	0.558303	9.33734	0.558303	9.33734	0.558303	9.33734	0.558303	9.33734	0.558303	9.33734	0.558303
426	9.35936	0.558303	9.35936	0.558303	9.35936	0.558303	9.35936	0.558303	9.35936	0.558303	9.35936	0.558303	9.35936	0.558303
427	9.38138	0.558303	9.38138	0.558303	9.38138	0.558303	9.38138	0.558303	9.38138	0.558303	9.38138	0.558303	9.38138	0.558303
428	9.4034	0.558303	9.4034	0.558303	9.4034	0.558303	9.4034	0.558303	9.4034	0.558303	9.4034	0.558303	9.4034	0.558303
429	9.42543	0.558303	9.42543	0.558303	9.42543	0.558303	9.42543	0.558303	9.42543	0.558303	9.42543	0.558303	9.42543	0.558303
430	9.44745	0.558303	9.44745	0.558303	9.44745	0.558303	9.44745	0.558303	9.44745	0.558303	9.44745	0.558303	9.44745	0.558303
431	9.46947	0.558303	9.46947	0.558303	9.46947	0.558303	9.46947	0.558303	9.46947	0.558303	9.46947	0.558303	9.46947	0.558303
432	9.49149	0.558303	9.49149	0.558303	9.49149	0.558303	9.49149	0.558303	9.49149	0.558303	9.49149	0.558303	9.49149	0.558303
433	9.51351	0.558303	9.51351	0.558303	9.51351	0.558303	9.51351	0.558303	9.51351	0.558303	9.51351	0.558303	9.51351	0.558303
434	9.53554	0.558303	9.53554	0.558303	9.53554	0.558303	9.53554	0.558303	9.53554	0.558303	9.53554	0.558303	9.53554	0.558303
435	9.55756	0.558303	9.55756	0.558303	9.55756	0.558303	9.55756	0.558303	9.55756	0.558303	9.55756	0.558303	9.55756	0.558303
436	9.57958	0.558303	9.57958	0.558303	9.57958	0.558303	9.57958	0.558303	9.57958	0.558303	9.57958	0.558303	9.57958	0.558303
437	9.6016	0.558303	9.6016	0.558303	9.6016	0.558303	9.6016	0.558303	9.6016	0.558303	9.6016	0.558303	9.6016	0.558303
438	9.62362	0.558303	9.62362	0.558303	9.62362	0.558303	9.62362	0.558303	9.62362	0.558303	9.62362	0.558303	9.62362	0.558303
439	9.64565	0.558303	9.64565	0.558303	9.64565	0.558303	9.64565	0.558303	9.64565	0.558303	9.64565	0.558303	9.64565	0.558303
440	9.66767	0.558303	9.66767	0.558303	9.66767	0.558303	9.66767	0.558303	9.66767	0.558303	9.66767	0.558303	9.66767	0.558303
441	9.68969	0.558303	9.68969	0.558303	9.68969	0.558303	9.68969	0.558303	9.68969	0.558303	9.68969	0.558303	9.68969	0.558303
442	9.71171	0.558303	9.71171	0.558303	9.71171	0.558303	9.71171	0.558303	9.71171	0.558303	9.71171	0.558303	9.71171	0.558303
443	9.73373	0.558303	9.73373	0.558303	9.73373	0.558303	9.73373	0.558303	9.73373	0.558303	9.73373	0.558303	9.73373	0.558303
444	9.75576	0.558303	9.75576	0.558303	9.75576	0.558303	9.75576	0.558303	9.75576	0.558303	9.75576	0.558303	9.75576	0.558303
445	9.77778	0.558303	9.77778	0.558303	9.77778	0.558303	9.77778	0.558303	9.77778	0.558303	9.77778	0.558303	9.77778	0.558303
446	9.7998	0.558303	9.7998	0.558303	9.7998	0.558303	9.7998	0.558303	9.7998	0.558303	9.7998	0.558303	9.7998	0.558303
447	9.82182	0.558303	9.82182	0.558303	9.82182	0.558303	9.82182	0.558303	9.82182	0.558303	9.82182	0.558303	9.82182	0.558303
448	9.84384	0.558303	9.84384	0.558303	9.84384	0.558303	9.84384	0.558303	9.84384	0.558303	9.84384	0.558303	9.84384	0.558303
449	9.86587	0.558303	9.86587	0.558303	9.86587	0.558303	9.86587	0.558303	9.86587	0.558303	9.86587	0.558303	9.86587	0.558303
450	9.88789	0.558303	9.88789	0.558303	9.88789	0.558303	9.88789	0.558303	9.88789	0.558303	9.88789	0.558303	9.88789	0.558303
451	9.90991	0.558303	9.90991	0.558303	9.90991	0.558303	9.90991	0.558303	9.90991	0.558303	9.90991	0.558303	9.90991	0.558303
452	9.93193	0.558303	9.93193	0.558303	9.93193	0.558303	9.93193	0.558303	9.93193	0.558303	9.93193	0.558303	9.93193	0.558303
453	9.95395	0.558303	9.95395	0.558303	9.95395	0.558303	9.95395	0.558303	9.95395	0.558303	9.95395	0.558303	9.95395	0.558303
454	9.97598	0.558303	9.97598	0.558303	9.97598	0.558303	9.97598	0.558303	9.97598	0.558303	9.97598	0.558303	9.97598	0.558303
455	9.998	0.558303	9.998	0.558303	9.998	0.558303	9.998	0.558303	9.998	0.558303	9.998	0.558303	9.998	0.558303
456	10.02	0.558303	10.02	0.558303	10.02	0.558303	10.02	0.558303	10.02	0.558303	10.02	0.558303	10.02	0.558303
457	10.042	0.558303	10.042	0.558303	10.042	0.558303	10.042	0.558303	10.042	0.558303	10.042	0.558303	10.042	0.558303
458	10.0641	0.558303	10.0641	0.558303	10.0641	0.558303	10.0641	0.558303	10.0641	0.558303	10.0641	0.558303	10.0641	0.558303
459	10.0861	0.558303	10.0861	0.558303	10.0861	0.558303	10.0861	0.558303	10.0861	0.558303	10.0861	0.558303	10.0861	0.558303
460	10.1081	0.558303	10.1081	0.558303	10.1081	0.558303	10.1081	0.558303	10.1081	0.558303	10.1081	0.558303	10.1081	0.558303
461	10.1301	0.558303	10.1301	0.558303	10.1301	0.558303	10.1301	0.558303	10.1301	0.558303	10.1301	0.558303	10.1301	0.558303
462	10.1522	0.558303	10.1522	0.558303	10.1522	0.558303	10.1522	0.558303	10.1522	0.558303	10.1522	0.558303	10.1522	0.558303
463	10.1742	0.558303	10.1742	0.558303	10.1742	0.558303	10.1742	0.558303	10.1742	0.558303	10.1742	0.558303	10.1742	0.558303
464	10.1962	0.558303	10.1962	0.558303	10.1962	0.558303	10.1962	0.558303	10.1962	0.558303	10.1962	0.558303	10.1962	0.558303
465	10.2182	0.558303	10.2182	0.558303	10.2182	0.558303	10.2182	0.558303	10.2182	0.558303	10.2182	0.558303	10.2182	0.558303
466	10.2402	0.558303	10.2402	0.558303	10.2402	0.558303	10.2402	0.558303	10.2402	0.558303	10.2402	0.558303	10.2402	0.558303
467	10.2623	0.558303	10.2623	0.558303	10.2623	0.558303	10.2623	0.558303	10.2623	0.558303	10.2623	0.558303	10.2623	0.558303
468	10.2843	0.558303	10.2843	0.558303	10.2843	0.558303	10.2843	0.558303	10.2843	0.558303	10.2843	0.558303	10.2843	0.558303
469	10.3063	0.558303	10.3063	0.558303	10.3063	0.558303	10.3063	0.558303	10.3063	0.558303	10.3063	0.558303	10.3063	0.558303
470	10.3283	0.558303	10.3283	0.558303	10.3283	0.558303	10.3283	0.558303	10.3283	0.558303	10.3283	0.558303	10.3283	0.558303
471	10.3504	0.558303	10.3504	0.558303	10.3504	0.558303	10.3504	0.558303	10.3504	0.558303	10.3504	0.558303	10.3504	0.558303
472	10.3724	0.558303	10.3724	0.558303	10.3724	0.558303	10.3724	0.558303	10.3724	0.558303	10.3724	0.558303	10.3724	0.558303
473	10.3944	0.558303	10.3944	0.558303	10.3944	0.558303	10.3944	0.558303	10.3944	0.558303	10.3944	0.558303	10.3944	0.558303
474	10.4164	0.558303	10.4164	0.558303	10.4164	0.558303	10.4164	0.558303	10.4164	0.558303	10.4164	0.558303	10.4164	0.558303
475	10.4384	0.558303	10.4384	0.558303	10.4384	0.558303	10.4384	0.558303	10.4384	0.558303	10.4384	0.558303	10.4384	0.558303
476	10.4605	0.558303	10.4605	0.558303	10.4605	0.558303	10.4605	0.558303	10.4605	0.558303	10.4605	0.558303	10.4605	0.558303
477	10.4825	0.558303	10.4825	0.558303	10.4825	0.558303	10.4825	0.558303	10.4825	0.558303	10.4825	0.558303	10.4825	0.558303
478	10.5045	0.558303	10.5045	0.558303	10.5045	0.558303	10.5045	0.558303	10.5045	0.558303	10.5045	0.558303	10.5045	0.558303
479	10.5265	0.558303	10.5265	0.558303	10.5265	0.558303	10.5265	0.558303	10.5265	0.558303	10.5265	0.558303	10.5265	0.558303
480	10.5485	0.558303	10.5485	0.558303	10.5485	0.558303	10.5485	0.558303	10.5485	0.558303	10.5485	0.558303	10.5485	0.558303
481	10.5706	0.558303	10.5706	0.558303	10.5706	0.558303	10.5706	0.558303	10.5706	0.558303	10.5706	0.558303	10.5706	0.558303
482	10.5926	0.558303	10.5926	0.558303	10.5926	0.558303	10.5926	0.558303	10.5926	0.558303	10.5926	0.558303	10.5926	0.558303
483	10.6146	0.558303	10.6146	0.558303	10.6146	0.558303	10.6146	0.558303	10.6146	0.558303	10.6146	0.558303	10.6146	0.558303
484	10.6366	0.558303	10.6366	0.558303	10.6366	0.558303	10.6366	0.558303	10.6366	0.558303	10.6366	0.558303	10.6366	0.558303
485	10.6587	0.558303	10.6587	0.558303	10.6587	0.558303	10.6587	0.558303	10.6587	0.558303	10.6587	0.558303	10.6587	0.558303
486	10.6807	0.558303	10.6807	0.558303	10.6807	0.558303	10.6807	0.558303	10.6807	0.558303	10.6807	0.558303	10.6807	0.558303
487	10.7027	0.558303	10.7027	0.558303	10.7027	0.558303	10.7027	0.558303	10.7027	0.558303	10.7027	0.558303	10.7027	0.558303
488	10.7247	0.558303	10.7247	0.558303	10.7247	0.558303	10.7247	0.558303	10.7247	0.558303	10.7247	0.558303	10.7247	0.558303
489	10.7467	0.558303	10.7467	0.558303	10.7467	0.558303	10.7467	0.558303	10.7467	0.558303	10.7467	0.558303	10.7467	0.558303
490	10.7688	0.558303	10.7688	0.558303	10.7688	0.558303	10.7688	0.558303	10.7688	0.558303	10.7688	0.558303	10.7688	0.558303
491	10.7908	0.558303	10.7908	0.558303	10.7908	0.558303	10.7908	0.558303	10.7908	0.558303	10.7908	0.558303	10.7908	0.558303
492	10.8128	0.558303	10.8128	0.558303	10.8128	0.558303	10.8128	0.558303	10.8128	0.558303	10.8128	0.558303	10.8128	0.558303
493	10.8348	0.558303	10.8348	0.558303	10.8348	0.558303	10.8348	0.558303	10.8348	0.558303	10.8348	0.558303	10.8348	0.558303
494	10.8569	0.558303	10.8569	0.558303	10.8569	0.558303	10.8569	0.558303	10.8569	0.558303	10.8569	0.558303	10.8569	0.558303
495	10.8789	0.558303	10.8789	0.558303	10.8789	0.558303	10.8789	0.558303	10.8789	0.558303	10.8789	0.558303	10.8789	0.558303
496	10.9009	0.558303	10.9009	0.558303	10.9009	0.558303	10.9009	0.558303	10.9009	0.558303	10.9009	0.558303	10.9009	0.558303
497	10.9229	0.558303	10.9229	0.558303	10.9229	0.558303	10.9229	0.558303	10.9229	0.558303	10.9229	0.558303	10.9229	0.558303
498	10.9449	0.558303	10.9449	0.558303	10.9449	0.558303	10.9449	0.558303	10.9449	0.558303	10.9449	0.558303	10.9449	0.558303
499	10.967	0.558303	10.967	0.558303	10.967	0.558303	10.967	0.558303	10.967	0.558303	10.967	0.558303	10.967	0.558303
500	10.989	0.558303	10.989	0.558303	10.989	0.558303	10.989	0.558303	10.989	0.558303	10.989	0.558303	10.989	0.558303
501	11.011	0.558303	11.011	0.558303	11.011	0.558303	11.011	0.558303	11.011	0.558303	11.011	0.558303	11.011	0.558303
502	11.033	0.558303	11.033	0.558303	11.033	0.558303	11.033	0.558303	11.033	0.558303	11.033	0.558303	11.033	0.558303
503	11.0551	0.558303	11.0551	0.558303	11.0551	0.558303	11.0551	0.558303	11.0551	0.558303	11.0551	0.558303	11.0551	0.558303
504	11.0771	0.558303	11.0771	0.558303	11.0771	0.558303	11.0771	0.558303	11.0771	0.558303	11.0771	0.558303	11.0771	0.558303
505	11.0991	0.558303	11.0991	0.558303	11.0991	0.558303	11.0991	0.558303	11.0991	0.558303	11.0991	0.558303	11.0991	0.558303
506	11.1211	0.558303	11.1211	0.558303	11.1211	0.558303	11.1211	0.558303	11.1211	0.558303	11.1211	0.558303	11.1211	0.558303
507	11.1431	0.558303	11.1431	0.558303	11.1431	0.558303	11.1431	0.558303	11.1431	0.558303	11.1431	0.558303	11.1431	0.558303
508	11.1652	0.558303	11.1652	0.558303	11.1652	0.558303	11.1652	0.558303	11.1652	0.558303	11.1652	0.558303	11.1652	0.558303
509	11.1872	0.558303	11.1872	0.558303	11.1872	0.558303	11.1872	0.558303	11.1872	0.558303	11.1872	0.558303	11.1872	0.558303
510	11.2092	0.558303	11.2092	0.558303	11.2092	0.558303	11.2092	0.558303	11.2092	0.558303	11.2092	0.558303	11.2092	0.558303
511	11.2312	0.558303	11.2312	0.558303	11.2312	0.558303	11.2312	0.558303	11.2312	0.558303	11.2312	0.558303	11.2312	0.558303
512	11.2533	0.558303	11.2533	0.558303	11.2533	0.558303	11.2533	0.558303	11.2533	0.558303	11.2533	0.558303	11.2533	0.558303
513	11.2753	0.558303	11.2753	0.558303	11.2753	0.558303	11.2753	0.558303	11.2753	0.558303	11.2753	0.558303	11.2753	0.558303
514	11.2973	0.558303	11.2973	0.558303	11.2973	0.558303	11.2973	0.558303	11.2973	0.558303	11.2973	0.558303	11.2973	0.558303
515	11.3193	0.558303	11.3193	0.558303	11.3193	0.558303	11.3193	0.558303	11.3193	0.558303	11.3193	0.558303	11.3193	0.558303
516	11.3413	0.558303	11.3413	0.558303	11.3413	0.558303	11.3413	0.558303	11.3413	0.558303	11.3413	0.558303	11.3413	0.558303
517	11.3634	0.558303	11.3634	0.558303	11.3634	0.558303	11.3634	0.558303	11.3634	0.558303	11.3634	0.558303	11.3634	0.558303
518	11.3854	0.558303	11.3854	0.558303	11.3854	0.558303	11.3854	0.558303	11.3854	0.558303	11.3854	0.558303	11.3854	0.558303
519	11.4074	0.558303	11.4074	0.558303	11.4074	0.558303	11.4074	0.558303	11.4074	0.558303	11.4074	0.558303	11.4074	0.558303
520	11.4294	0.558303	11.4294	0.558303	11.4294	0.558303	11.4294	0.558303	11.4294	0.558303	11.4294	0.558303	11.4294	0.558303
521	11.4515	0.558303	11.4515	0.558303	11.4515	0.558303	11.4515	0.558303	11.4515	0.558303	11.4515	0.558303	11.4515	0.558303
522	11.4735	0.558303	11.4735	0.558303	11.4735	0.558303	11.4735	0.558303	11.4735	0.558303	11.4735	0.558303	11.4735	0.558303
523	11.4955	0.558303	11.4955	0.558303	11.4955	0.558303	11.4955	0.558303	11.4955	0.558303	11.4955	0.558303	11.4955	0.558303
524	11.5175	0.558303	11.5175	0.558303	11.5175	0.558303	11.5175	0.558303	11.5175	0.558303	11.5175	0.558303	11.5175	0.558303
525	11.5395	0.558303	11.5395	0.558303	11.5395	0.558303	11.5395	0.558303	11.5395	0.558303	11.5395	0.558303	11.5395	0.558303
526	11.5616	0.558303	11.5616	0.558303	11.5616	0.558303	11.5616	0.558303	11.5616	0.558303	11.5616	0.558303	11.5616	0.558303
527	11.5836	0.558303	11.5836	0.558303	11.5836	0.558303	11.5836	0.558303	11.5836	0.558303	11.5836	0.558303	11.5836	0.558303
528	11.6056	0.558303	11.6056	0.558303	11.6056	0.558303	11.6056	0.558303	11.6056	0.558303	11.6056	0.558303	11.6056	0.558303
529	11.6276	0.558303	11.6276	0.558303	11.6276	0.558303	11.6276	0.558303	11.6276	0.558303	11.6276	0.558303	11.6276	0.558303
530	11.6496	0.520119	11.6496	0.520119	11.6496	0.520119	11.6496	0.520119	11.6496	0.520119	11.6496	0.520119	11.6496	0.520119
531	11.6717	0.520119	11.6717	0.520119	11.6717	0.520119	11.6717	0.520119	11.6717	0.520119	11.6717	0.520119	11.6717	0.520119
532	11.6937	0.520119	11.6937	0.520119	11.6937	0.520119	11.6937	0.520119	11.6937	0.520119	11.6937	0.520119	11.6937	0.520119
533	11.7157	0.520119	11.7157	0.520119	11.7157	0.520119	11.7157	0.520119	11.7157	0.520119	11.7157	0.520119	11.7157	0.520119
534	11.7377	0.520119	11.7377	0.520119	11.7377	0.520119	11.7377	0.520119	11.7377	0.520119	11.7377	0.520119	11.7377	0.520119
535	11.7598	0.520119	11.7598	0.520119	11.7598	0.520119	11.7598	0.520119	11.7598	0.520119	11.7598	0.520119	11.7598	0.520119
536	11.7818	0.520119	11.7818	0.520119	11.7818	0.520119	11.7818	0.520119	11.7818	0.520119	11.7818	0.520119	11.7818	0.520119
537	11.8038	0.520119	11.8038	0.520119	11.8038	0.520119	11.8038	0.520119	11.8038	0.520119	11.8038	0.520119	11.8038	0.520119
538	11.8258	0.520119	11.8258	0.520119	11.8258	0.520119	11.8258	0.520119	11.8258	0.520119	11.8258	0.520119	11.8258	0.520119
539	11.8478	0.520119	11.8478	0.520119	11.8478	0.520119	11.8478	0.520119	11.8478	0.520119	11.8478	0.520119	11.8478	0.520119
540	11.8699	0.520119	11.8699	0.520119	11.8699	0.520119	11.8699	0.520119	11.8699	0.520119	11.8699	0.520119	11.8699	0.520119
541	11.8919	0.467166	11.8919	0.467166	11.8919	0.467166	11.8919	0.467166	11.8919	0.467166	11.8919	0.467166	11.8919	0.467166
542	11.9139	0.467166	11.9139	0.467166	11.9139	0.467166	11.9139	0.467166	11.9139	0.467166	11.9139	0.467166	11.9139	0.467166
543	11.9359	0.467166	11.9359	0.467166	11.9359	0.467166	11.9359	0.467166	11.9359	0.467166	11.9359	0.467166	11.9359	0.467166
544	11.958	0.467166	11.958	0.467166	11.958	0.467166	11.958	0.467166	11.958	0.467166	11.958	0.467166	11.958	0.467166
545	11.98	0.467166	11.98	0.467166	11.98	0.467166	11.98	0.467166	11.98	0.467166	11.98	0.467166	11.98	0.467166
546	12.002	0.467166	12.002	0.467166	12.002	0.467166	12.002	0.467166	12.002	0.467166	12.002	0.467166	12.002	0.467166
547	12.024	0.467166	12.024	0.467166	12.024	0.467166	12.024	0.467166	12.024	0.467166	12.024	0.467166	12.024	0.467166
548	12.046	0.467166	12.046	0.467166	12.046	0.467166	12.046	0.467166	12.046	0.467166	12.046	0.467166	12.046	0.467166
549	12.0681	0.467166	12.0681	0.467166	12.0681	0.467166	12.0681	0.467166	12.0681	0.467166	12.0681	0.467166	12.0681	0.467166
550	12.0901	0.467166	12.0901	0.467166	12.0901	0.467166	12.0901	0.467166	12.0901	0.467166	12.0901	0.467166	12.0901	0.467166
551	12.1121	0.467166	12.1121	0.467166	12.1121	0.467166	12.1121	0.467166	12.1121	0.467166	12.1121	0.467166	12.1121	0.467166
552	12.1341	0.467166	12.1341	0.467166	12.1341	0.467166	12.1341	0.467166	12.1341	0.467166	12.1341	0.467166	12.1341	0.467166
553	12.1562	0.467166	12.1562	0.467166	12.1562	0.467166	12.1562	0.467166	12.1562	0.467166	12.1562	0.467166	12.1562	0.467166
554	12.1782	0.467166	12.1782	0.467166	12.1782	0.467166	12.1782	0.467166	12.1782	0.467166	12.1782	0.467166	12.1782	0.467166
555	12.2002	0.467166	12.2002	0.467166	12.2002	0.467166	12.2002	0.467166	12.2002	0.467166	12.2002	0.467166	12.2002	0.467166
556	12.2222	0.467166	12.2222	0.467166	12.2222	0.467166	12.2222	0.467166	12.2222	0.467166	12.2222	0.467166	12.2222	0.467166
557	12.2442	0.467166	12.2442	0.467166	12.2442	0.467166	12.2442	0.467166	12.2442	0.467166	12.2442	0.467166	12.2442	0.467166
558	12.2663	0.467166	12.2663	0.467166	12.2663	0.467166	12.2663	0.467166	12.2663	0.467166	12.2663	0.467166	12.2663	0.467166
559	12.2883	0.467166	12.2883	0.467166	12.2883	0.467166	12.2883	0.467166	12.2883	0.467166	12.2883	0.467166	12.2883	0.467166
560	12.3103	0.467166	12.3103	0.467166	12.3103	0.467166	12.3103	0.467166	12.3103	0.467166	12.3103	0.467166	12.3103	0.467166
561	12.3323	0.467166	12.3323	0.467166	12.3323	0.467166	12.3323	0.467166	12.3323	0.467166	12.3323	0.467166	12.3323	0.467166
562	12.3544	0.467166	12.3544	0.467166	12.3544	0.467166	12.3544	0.467166	12.3544	0.467166	12.3544	0.467166	12.3544	0.467166
563	12.3764	0.467166	12.3764	0.467166	12.3764	0.467166	12.3764	0.467166	12.3764	0.467166	12.3764	0.467166	12.3764	0.467166
564	12.3984	0.467166	12.3984	0.467166	12.3984	0.467166	12.3984	0.467166	12.3984	0.467166	12.3984	0.467166	12.3984	0.467166
565	12.4204	0.467166	12.4204	0.467166	12.4204	0.467166	12.4204	0.467166	12.4204	0.467166	12.4204	0.467166	12.4204	0.467166
566	12.4424	0.467166	12.4424	0.467166	12.4424	0.467166	12.4424	0.467166	12.4424	0.467166	12.4424	0.467166	12.4424	0.467166
567	12.4645	0.467166	12.4645	0.467166	12.4645	0.467166	12.4645	0.467166	12.4645	0.467166	12.4645	0.467166	12.4645	0.467166
568	12.4865	0.467166	12.4865	0.467166	12.4865	0.467166	12.4865	0.467166	12.4865	0.467166	12.4865	0.467166	12.4865	0.467166
569	12.5085	0.467166	12.5085	0.467166	12.5085	0.467166	12.5085	0.467166	12.5085	0.467166	12.5085	0.467166	12.5085	0.467166
570	12.5305	0.467166	12.5305	0.467166	12.5305	0.467166	12.5305	0.467166	12.5305	0.467166	12.5305	0.467166	12.5305	0.467166
571	12.5526	0.467166	12.5526	0.467166	12.5526	0.467166	12.5526	0.467166	12.5526	0.467166	12.5526	0.467166	12.5526	0.467166
572	12.5746	0.467166	12.5746	0.467166	12.5746	0.467166	12.5746	0.467166	12.5746	0.467166	12.5746	0.467166	12.5746	0.467166
573	12.5966	0.467166	12.5966	0.467166	12.5966	0.467166	12.5966	0.467166	12.5966	0.467166	12.5966	0.467166	12.5966	0.467166
574	12.6186	0.467166	12.6186	0.467166	12.6186	0.467166	12.6186	0.467166	12.6186	0.467166	12.6186	0.467166	12.6186	0.467166
575	12.6406	0.467166	12.6406	0.467166	12.6406	0.467166	12.6406	0.467166	12.6406	0.467166	12.6406	0.467166	12.6406	0.467166
576	12.6627	0.467166	12.6627	0.467166	12.6627	0.467166	12.6627	0.467166	12.6627	0.467166	12.6627	0.467166	12.6627	0.467166
577	12.6847	0.467166	12.6847	0.467166	12.6847	0.467166	12.6847	0.467166	12.6847	0.467166	12.6847	0.467166	12.6847	0.467166
578	12.7067	0.467166	12.7067	0.467166	12.7067	0.467166	12.7067	0.467166	12.7067	0.467166	12.7067	0.467166	12.7067	0.467166
579	12.7287	0.467166	12.7287	0.467166	12.7287	0.467166	12.7287	0.467166	12.7287	0.467166	12.7287	0.467166	12.7287	0.467166
580	12.7508	0.467166	12.7508	0.467166	12.7508	0.467166	12.7508	0.467166	12.7508	0.467166	12.7508	0.467166	12.7508	0.467166
581	12.7728	0.467166	12.7728	0.467166	12.7728	0.467166	12.7728	0.467166	12.7728	0.467166	12.7728	0.467166	12.7728	0.467166
582	12.7948	0.467166	12.7948	0.467166	12.7948	0.467166	12.7948	0.467166	12.7948	0.467166	12.7948	0.467166	12.7948	0.467166
583	12.8168	0.467166	12.8168	0.467166	12.8168	0.467166	12.8168	0.467166	12.8168	0.467166	12.8168	0.467166	12.8168	0.467166
584	12.8388	0.467166	12.8388	0.467166	12.8388	0.467166	12.8388	0.467166	12.8388	0.467166	12.8388	0.467166	12.8388	0.467166
585	12.8609	0.467166	12.8609	0.467166	12.8609	0.467166	12.8609	0.467166	12.8609	0.467166	12.8609	0.467166	12.8609	0.467166
586	12.8829	0.467166	12.8829	0.467166	12.8829	0.467166	12.8829	0.467166	12.8829	0.467166	12.8829	0.467166	12.8829	0.467166
587	12.9049	0.467166	12.9049	0.467166	12.9049	0.467166	12.9049	0.467166	12.9049	0.467166	12.9049	0.467166	12.9049	0.467166
588	12.9269	0.467166	12.9269	0.467166	12.9269	0.467166	12.9269	0.467166	12.9269	0.467166	12.9269	0.467166	12.9269	0.467166
589	12.9489	0.467166	12.9489	0.467166	12.9489	0.467166	12.9489	0.467166	12.9489	0.467166	12.9489	0.467166	12.9489	0.467166
590	12.971	0.467166	12.971	0.467166	12.971	0.467166	12.971	0.467166	12.971	0.467166	12.971	0.467166	12.971	0.467166
591	12.993	0.467166	12.993	0.467166	12.993	0.467166	12.993	0.467166	12.993	0.467166	12.993	0.467166	12.993	0.467166
592	13.015	0.467166	13.015	0.467166	13.015	0.467166	13.015	0.467166	13.015	0.467166	13.015	0.467166	13.015	0.467166
593	13.037	0.467166	13.037	0.467166	13.037	0.467166	13.037	0.467166	13.037	0.467166	13.037	0.467166	13.037	0.467166
594	13.0591	0.467166	13.0591	0.467166	13.0591	0.467166	13.0591	0.467166	13.0591	0.467166	13.0591	0.467166	13.0591	0.467166
595	13.0811	0.467166	13.0811	0.467166	13.0811	0.467166	13.0811	0.467166	13.0811	0.467166	13.0811	0.467166	13.0811	0.467166
596	13.1031	0.467166	13.1031	0.467166	13.1031	0.467166	13.1031	0.467166	13.1031	0.467166	13.1031	0.467166	13.1031	0.467166
597	13.1251	0.467166	13.1251	0.467166	13.1251	0.467166	13.1251	0.467166	13.1251	0.467166	13.1251	0.467166	13.1251	0.467166
598	13.1471	0.467166	13.1471	0.467166	13.1471	0.467166	13.1471	0.467166	13.1471	0.467166	13.1471	0.467166	13.1471	0.467166
599	13.1692	0.467166	13.1692	0.467166	13.1692	0.467166	13.1692	0.467166	13.1692	0.467166	13.1692	0.467166	13.1692	0.467166
600	13.1912	0.467166	13.1912	0.467166	13.1912	0.467166	13.1912	0.467166	13.1912	0.467166	13.1912	0.467166	13.1912	0.467166
601	13.2132	0.467166	13.2132	0.467166	13.2132	0.467166	13.2132	0.467166	13.2132	0.467166	13.2132	0.467166	13.2132	0.467166
602	13.2352	0.467166	13.2352	0.467166	13.2352	0.467166	13.2352	0.467166	13.2352	0.467166	13.2352	0.467166	13.2352	0.467166
603	13.2573	0.467166	13.2573	0.467166	13.2573	0.467166	13.2573	0.467166	13.2573	0.467166	13.2573	0.467166	13.2573	0.467166
604	13.2793	0.467166	13.2793	0.467166	13.2793	0.467166	13.2793	0.467166	13.2793	0.467166	13.2793	0.467166	13.2793	0.467166
605	13.3013	0.467166	13.3013	0.467166	13.3013	0.467166	13.3013	0.467166	13.3013	0.467166	13.3013	0.467166	13.3013	0.467166
606	13.3233	0.467166	13.3233	0.467166	13.3233	0.467166	13.3233	0.467166	13.3233	0.467166	13.3233	0.467166	13.3233	0.467166
607	13.3453	0.467166	13.3453	0.467166	13.3453	0.467166	13.3453	0.467166	13.3453	0.467166	13.3453	0.467166	13.3453	0.467166
608	13.3674	0.467166	13.3674	0.467166	13.3674	0.467166	13.3674	0.467166	13.3674	0.467166	13.3674	0.467166	13.3674	0.467166
609	13.3894	0.467166	13.3894	0.467166	13.3894	0.467166	13.3894	0.467166	13.3894	0.467166	13.3894	0.467166	13.3894	0.467166
610	13.4114	0.467166	13.4114	0.467166	13.4114	0.467166	13.4114	0.467166	13.4114	0.467166	13.4114	0.467166	13.4114	0.467166
611	13.4334	0.467166	13.4334	0.467166	13.4334	0.467166	13.4334	0.467166	13.4334	0.467166	13.4334	0.467166	13.4334	0.467166
612	13.4555	0.467166	13.4555	0.467166	13.4555	0.467166	13.4555	0.467166	13.4555	0.467166	13.4555	0.467166	13.4555	0.467166
613	13.4775	0.467166	13.4775	0.467166	13.4775	0.467166	13.4775	0.467166	13.4775	0.467166	13.4775	0.467166	13.4775	0.467166
614	13.4995	0.467166	13.4995	0.467166	13.4995	0.467166	13.4995	0.467166	13.4995	0.467166	13.4995	0.467166	13.4995	0.467166
615	13.5215	0.467166	13.5215	0.467166	13.5215	0.467166	13.5215	0.467166	13.5215	0.467166	13.5215	0.467166	13.5215	0.467166
616	13.5435	0.467166	13.5435	0.467166	13.5435	0.467166	13.5435	0.467166	13.5435	0.467166	13.5435	0.467166	13.5435	0.467166
617	13.5656	0.467166	13.5656	0.467166	13.5656	0.467166	13.5656	0.467166	13.5656	0.467166	13.5656	0.467166	13.5656	0.467166
618	13.5876	0.467166	13.5876	0.467166	13.5876	0.467166	13.5876	0.467166	13.5876	0.467166	13.5876	0.467166	13.5876	0.467166
619	13.6096	0.467166	13.6096	0.467166	13.6096	0.467166	13.6096	0.467166	13.6096	0.467166	13.6096	0.467166	13.6096	0.467166
620	13.6316	0.467166	13.6316	0.467166	13.6316	0.467166	13.6316	0.467166	13.6316	0.467166	13.6316	0.467166	13.6316	0.467166
621	13.6537	0.467166	13.6537	0.467166	13.6537	0.467166	13.6537	0.467166	13.6537	0.467166	13.6537	0.467166	13.6537	0.467166
622	13.6757	0.467166	13.6757	0.467166	13.6757	0.467166	13.6757	0.467166	13.6757	0.467166	13.6757	0.467166	13.6757	0.467166
623	13.6977	0.467166	13.6977	0.467166	13.6977	0.467166	13.6977	0.467166	13.6977	0.467166	13.6977	0.467166	13.6977	0.467166
624	13.7197	0.467166	13.7197	0.467166	13.7197	0.467166	13.7197	0.467166	13.7197	0.467166	13.7197	0.467166	13.7197	0.467166
625	13.7417	0.467166	13.7417	0.467166	13.7417	0.467166	13.7417	0.467166	13.7417	0.467166	13.7417	0.467166	13.7417	0.467166
626	13.7638	0.467166	13.7638	0.467166	13.7638	0.467166	13.7638	0.467166	13.7638	0.467166	13.7638	0.467166	13.7638	0.467166
627	13.7858	0.453552	13.7858	0.453552	13.7858	0.453552	13.7858	0.453552	13.7858	0.453552	13.7858	0.453552	13.7858	0.453552
628	13.8078	0.453552	13.8078	0.453552	13.8078	0.453552	13.8078	0.453552	13.8078	0.453552	13.8078	0.453552	13.8078	0.453552
629	13.8298	0.453552	13.8298	0.453552	13.8298	0.453552	13.8298	0.453552	13.8298	0.453552	13.8298	0.453552	13.8298	0.453552
630	13.8519	0.453552	13.8519	0.453552	13.8519	0.453552	13.8519	0.453552	13.8519	0.453552	13.8519	0.453552	13.8519	0.453552
631	13.8739	0.453552	13.8739	0.453552	13.8739	0.453552	13.8739	0.453552	13.8739	0.453552	13.8739	0.453552	13.8739	0.453552
632	13.8959	0.453552	13.8959	0.453552	13.8959	0.453552	13.8959	0.453552	13.8959	0.453552	13.8959	0.453552	13.8959	0.453552
633	13.9179	0.453552	13.9179	0.453552	13.9179	0.453552	13.9179	0.453552	13.9179	0.453552	13.9179	0.453552	13.9179	0.453552
634	13.9399	0.453552	13.9399	0.453552	13.9399	0.453552	13.9399	0.453552	13.9399	0.453552	13.9399	0.453552	13.9399	0.453552
635	13.962	0.453552	13.962	0.453552	13.962	0.453552	13.962	0.453552	13.962	0.453552	13.962	0.453552	13.962	0.453552
636	13.984	0.453552	13.984	0.453552	13.984	0.453552	13.984	0.453552	13.984	0.453552	13.984	0.453552	13.984	0.453552
637	14.006	0.453552	14.006	0.453552	14.006	0.453552	14.006	0.453552	14.006	0.453552	14.006	0.453552	14.006	0.453552
638	14.028	0.453552	14.028	0.453552	14.028	0.453552	14.028	0.453552	14.028	0.453552	14.028	0.453552	14.028	0.453552
639	14.0501	0.453552	14.0501	0.453552	14.0501	0.453552	14.0501	0.453552	14.0501	0.453552	14.0501	0.453552	14.0501	0.453552
640	14.0721	0.453552	14.0721	0.453552	14.0721	0.453552	14.0721	0.453552	14.0721	0.453552	14.0721	0.453552	14.0721	0.453552
641	14.0941	0.453552	14.0941	0.453552	14.0941	0.453552	14.0941	0.453552	14.0941	0.453552	14.0941	0.453552	14.0941	0.453552
642	14.1161	0.453552	14.1161	0.453552	14.1161	0.453552	14.1161	0.453552	14.1161	0.453552	14.1161	0.453552	14.1161	0.453552
643	14.1381	0.453552	14.1381	0.453552	14.1381	0.453552	14.1381	0.453552	14.1381	0.453552	14.1381	0.453552	14.1381	0.453552
644	14.1602	0.453552	14.1602	0.453552	14.1602	0.453552	14.1602	0.453552	14.1602	0.453552	14.1602	0.453552	14.1602	0.453552
645	14.1822	0.453552	14.1822	0.453552	14.1822	0.453552	14.1822	0.453552	14.1822	0.453552	14.1822	0.453552	14.1822	0.453552
646	14.2042	0.453552	14.2042	0.453552	14.2042	0.453552	14.2042	0.453552	14.2042	0.453552	14.2042	0.453552	14.2042	0.453552
647	14.2262	0.453552	14.2262	0.453552	14.2262	0.453552	14.2262	0.453552	14.2262	0.453552	14.2262	0.453552	14.2262	0.453552
648	14.2482	0.453552	14.2482	0.453552	14.2482	0.453552	14.2482	0.453552	14.2482	0.453552	14.2482	0.453552	14.2482	0.453552
649	14.2703	0.453552	14.2703	0.453552	14.2703	0.453552	14.2703	0.453552	14.2703	0.453552	14.2703	0.453552	14.2703	0.453552
650	14.2923	0.453552	14.2923	0.453552	14.2923	0.453552	14.2923	0.453552	14.2923	0.453552	14.2923	0.453552	14.2923	0.453552
651	14.3143	0.453552	14.3143	0.453552	14.3143	0.453552	14.3143	0.453552	14.3143	0.453552	14.3143	0.453552	14.3143	0.453552
652	14.3363	0.453552	14.3363	0.453552	14.3363	0.453552	14.3363	0.453552	14.3363	0.453552	14.3363	0.453552	14.3363	0.453552
653	14.3584	0.453552	14.3584	0.453552	14.3584	0.453552	14.3584	0.453552	14.3584	0.453552	14.3584	0.453552	14.3584	0.453552
654	14.3804	0.453552	14.3804	0.453552	14.3804	0.453552	14.3804	0.453552	14.3804	0.453552	14.3804	0.453552	14.3804	0.453552
655	14.4024	0.453552	14.4024	0.453552	14.4024	0.453552	14.4024	0.453552	14.4024	0.453552	14.4024	0.453552	14.4024	0.453552
656	14.4244	0.453552	14.4244	0.453552	14.4244	0.453552	14.4244	0.453552	14.4244	0.453552	14.4244	0.453552	14.4244	0.453552
657	14.4464	0.453552	14.4464	0.453552	14.4464	0.453552	14.4464	0.453552	14.4464	0.453552	14.4464	0.453552	14.4464	0.453552
658	14.4685	0.453552	14.4685	0.453552	14.4685	0.453552	14.4685	0.453552	14.4685	0.453552	14.4685	0.453552	14.4685	0.453552
659	14.4905	0.453552	14.4905	0.453552	14.4905	0.453552	14.4905	0.453552	14.4905	0.453552	14.4905	0.453552	14.4905	0.453552
660	14.5125	0.453552	14.5125	0.453552	14.5125	0.453552	14.5125	0.453552	14.5125	0.453552	14.5125	0.453552	14.5125	0.453552
661	14.5345	0.453552	14.5345	0.453552	14.5345	0.453552	14.5345	0.453552	14.5345	0.453552	14.5345	0.453552	14.5345	0.453552
662	14.5566	0.453552	14.5566	0.453552	14.5566	0.453552	14.5566	0.453552	14.5566	0.453552	14.5566	0.453552	14.5566	0.453552
663	14.5786	0.453552	14.5786	0.453552	14.5786	0.453552	14.5786	0.453552	14.5786	0.453552	14.5786	0.453552	14.5786	0.453552
664	14.6006	0.453552	14.6006	0.453552	14.6006	0.453552	14.6006	0.453552	14.6006	0.453552	14.6006	0.453552	14.6006	0.453552
665	14.6226	0.453552	14.6226	0.453552	14.6226	0.453552	14.6226	0.453552	14.6226	0.453552	14.6226	0.453552	14.6226	0.453552
666	14.6446	0.453552	14.6446	0.453552	14.6446	0.453552	14.6446	0.453552	14.6446	0.453552	14.6446	0.453552	14.6446	0.453552
667	14.6667	0.453552	14.6667	0.453552	14.6667	0.453552	14.6667	0.453552	14.6667	0.453552	14.6667	0.453552	14.6667	0.453552
668	14.6887	0.453552	14.6887	0.453552	14.6887	0.453552	14.6887	0.453552	14.6887	0.453552	14.6887	0.453552	14.6887	0.453552
669	14.7107	0.453552	14.7107	0.453552	14.7107	0.453552	14.7107	0.453552	14.7107	0.453552	14.7107	0.453552	14.7107	0.453552
670	14.7327	0.453552	14.7327	0.453552	14.7327	0.453552	14.7327	0.453552	14.7327	0.453552	14.7327	0.453552	14.7327	0.453552
671	14.7548	0.453552	14.7548	0.453552	14.7548	0.453552	14.7548	0.453552	14.7548	0.453552	14.7548	0.453552	14.7548	0.453552
672	14.7768	0.453552	14.7768	0.453552	14.7768	0.453552	14.7768	0.453552	14.7768	0.453552	14.7768	0.453552	14.7768	0.453552
673	14.7988	0.453552	14.7988	0.453552	14.7988	0.453552	14.7988	0.453552	14.7988	0.453552	14.7988	0.453552	14.7988	0.453552
674	14.8208	0.453552	14.8208	0.453552	14.8208	0.453552	14.8208	0.453552	14.8208	0.453552	14.8208	0.453552	14.8208	0.453552
675	14.8428	0.453552	14.8428	0.453552	14.8428	0.453552	14.8428	0.453552	14.8428	0.453552	14.8428	0.453552	14.8428	0.453552
676	14.8649	0.453552	14.8649	0.453552	14.8649	0.453552	14.8649	0.453552	14.8649	0.453552	14.8649	0.453552	14.8649	0.453552
677	14.8869	0.453552	14.8869	0.453552	14.8869	0.453552	14.8869	0.453552	14.8869	0.453552	14.8869	0.453552	14.8869	0.453552
678	14.9089	0.453552	14.9089	0.453552	14.9089	0.453552	14.9089	0.453552	14.9089	0.453552	14.9089	0.453552	14.9089	0.453552
679	14.9309	0.453552	14.9309	0.453552	14.9309	0.453552	14.9309	0.453552	14.9309	0.453552	14.9309	0.453552	14.9309	0.453552
680	14.953	0.453552	14.953	0.453552	14.953	0.453552	14.953	0.453552	14.953	0.453552	14.953	0.453552	14.953	0.453552
681	14.975	0.453552	14.975	0.453552	14.975	0.453552	14.975	0.453552	14.975	0.453552	14.975	0.453552	14.975	0.453552
682	14.997	0.453552	14.997	0.453552	14.997	0.453552	14.997	0.453552	14.997	0.453552	14.997	0.453552	14.997	0.453552
683	15.019	0.453552	15.019	0.453552	15.019	0.453552	15.019	0.453552	15.019	0.453552	15.019	0.453552	15.019	0.453552
684	15.041	0.453552	15.041	0.453552	15.041	0.453552	15.041	0.453552	15.041	0.453552	15.041	0.453552	15.041	0.453552
685	15.0631	0.453552	15.0631	0.453552	15.0631	0.453552	15.0631	0.453552	15.0631	0.453552	15.0631	0.453552	15.0631	0.453552
686	15.0851	0.453552	15.0851	0.453552	15.0851	0.453552	15.0851	0.453552	15.0851	0.453552	15.0851	0.453552	15.0851	0.453552
687	15.1071	0.453552	15.1071	0.453552	15.1071	0.453552	15.1071	0.453552	15.1071	0.453552	15.1071	0.453552	15.1071	0.453552
688	15.1291	0.453552	15.1291	0.453552	15.1291	0.453552	15.1291	0.453552	15.1291	0.453552	15.1291	0.453552	15.1291	0.453552
689	15.1512	0.453552	15.1512	0.453552	15.1512	0.453552	15.1512	0.453552	15.1512	0.453552	15.1512	0.453552	15.1512	0.453552
690	15.1732	0.453552	15.1732	0.453552	15.1732	0.453552	15.1732	0.453552	15.1732	0.453552	15.1732	0.453552	15.1732	0.453552
691	15.1952	0.453552	15.1952	0.453552	15.1952	0.453552	15.1952	0.453552	15.1952	0.453552	15.1952	0.453552	15.1952	0.453552
692	15.2172	0.453552	15.2172	0.453552	15.2172	0.453552	15.2172	0.453552	15.2172	0.453552	15.2172	0.453552	15.2172	0.453552
693	15.2392	0.453552	15.2392	0.453552	15.2392	0.453552	15.2392	0.453552	15.2392	0.453552	15.2392	0.453552	15.2392	0.453552
694	15.2613	0.453552	15.2613	0.453552	15.2613	0.453552	15.2613	0.453552	15.2613	0.453552	15.2613	0.453552	15.2613	0.453552
695	15.2833	0.453552	15.2833	0.453552	15.2833	0.453552	15.2833	0.453552	15.2833	0.453552	15.2833	0.453552	15.2833	0.453552
696	15.3053	0.453552	15.3053	0.453552	15.3053	0.453552	15.3053	0.453552	15.3053	0.453552	15.3053	0.453552	15.3053	0.453552
697	15.3273	0.453552	15.3273	0.453552	15.3273	0.453552	15.3273	0.453552	15.3273	0.453552	15.3273	0.453552	15.3273	0.453552
698	15.3493	0.453552	15.3493	0.453552	15.3493	0.453552	15.3493	0.453552	15.3493	0.453552	15.3493	0.453552	15.3493	0.453552
699	15.3714	0.453552	15.3714	0.453552	15.3714	0.453552	15.3714	0.453552	15.3714	0.453552	15.3714	0.453552	15.3714	0.453552
700	15.3934	0.453552	15.3934	0.453552	15.3934	0.453552	15.3934	0.453552	15.3934	0.453552	15.3934	0.453552	15.3934	0.453552
701	15.4154	0.453552	15.4154	0.453552	15.4154	0.453552	15.4154	0.453552	15.4154	0.453552	15.4154	0.453552	15.4154	0.453552
702	15.4374	0.453552	15.4374	0.453552	15.4374	0.453552	15.4374	0.453552	15.4374	0.453552	15.4374	0.453552	15.4374	0.453552
703	15.4595	0.453552	15.4595	0.453552	15.4595	0.453552	15.4595	0.453552	15.4595	0.453552	15.4595	0.453552	15.4595	0.453552
704	15.4815	0.453552	15.4815	0.453552	15.4815	0.453552	15.4815	0.453552	15.4815	0.453552	15.4815	0.453552	15.4815	0.453552
705	15.5035	0.453552	15.5035	0.453552	15.5035	0.453552	15.5035	0.453552	15.5035	0.453552	15.5035	0.453552	15.5035	0.453552
706	15.5255	0.453552	15.5255	0.453552	15.5255	0.453552	15.5255	0.453552	15.5255	0.453552	15.5255	0.453552	15.5255	0.453552
707	15.5475	0.453552	15.5475	0.453552	15.5475	0.453552	15.5475	0.453552	15.5475	0.453552	15.5475	0.453552	15.5475	0.453552
708	15.5696	0.453552	15.5696	0.453552	15.5696	0.453552	15.5696	0.453552	15.5696	0.453552	15.5696	0.453552	15.5696	0.453552
709	15.5916	0.453552	15.5916	0.453552	15.5916	0.453552	15.5916	0.453552	15.5916	0.453552	15.5916	0.453552	15.5916	0.453552
710	15.6136	0.453552	15.6136	0.453552	15.6136	0.453552	15.6136	0.453552	15.6136	0.453552	15.6136	0.453552	15.6136	0.453552
711	15.6356	0.453552	15.6356	0.453552	15.6356	0.453552	15.6356	0.453552	15.6356	0.453552	15.6356	0.453552	15.6356	0.453552
712	15.6577	0.453552	15.6577	0.453552	15.6577	0.453552	15.6577	0.453552	15.6577	0.453552	15.6577	0.453552	15.6577	0.453552
713	15.6797	0.453552	15.6797	0.453552	15.6797	0.453552	15.6797	0.453552	15.6797	0.453552	15.6797	0.453552	15.6797	0.453552
714	15.7017	0.453552	15.7017	0.453552	15.7017	0.453552	15.7017	0.453552	15.7017	0.453552	15.7017	0.453552	15.7017	0.453552
715	15.7237	0.453552	15.7237	0.453552	15.7237	0.453552	15.7237	0.453552	15.7237	0.453552	15.7237	0.453552	15.7237	0.453552
716	15.7457	0.453552	15.7457	0.453552	15.7457	0.453552	15.7457	0.453552	15.7457	0.453552	15.7457	0.453552	15.7457	0.453552
717	15.7678	0.453552	15.7678	0.453552	15.7678	0.453552	15.7678	0.453552	15.7678	0.453552	15.7678	0.453552	15.7678	0.453552
718	15.7898	0.453552	15.7898	0.453552	15.7898	0.453552	15.7898	0.453552	15.7898	0.453552	15.7898	0.453552	15.7898	0.453552
719	15.8118	0.453552	15.8118	0.453552	15.8118	0.453552	15.8118	0.453552	15.8118	0.453552	15.8118	0.453552	15.8118	0.453552
720	15.8338	0.453552	15.8338	0.453552	15.8338	0.453552	15.8338	0.453552	15.8338	0.453552	15.8338	0.453552	15.8338	0.453552
721	15.8559	0.453552	15.8559	0.453552	15.8559	0.453552	15.8559	0.453552	15.8559	0.453552	15.8559	0.453552	15.8559	0.453552
722	15.8779	0.453552	15.8779	0.453552	15.8779	0.453552	15.8779	0.453552	15.8779	0.453552	15.8779	0.453552	15.8779	0.453552
723	15.8999	0.453552	15.8999	0.453552	15.8999	0.453552	15.8999	0.453552	15.8999	0.453552	15.8999	0.453552	15.8999	0.453552
724	15.9219	0.453552	15.9219	0.453552	15.9219	0.453552	15.9219	0.453552	15.9219	0.453552	15.9219	0.453552	15.9219	0.453552
725	15.9439	0.453552	15.9439	0.453552	15.9439	0.453552	15.9439	0.453552	15.9439	0.453552	15.9439	0.453552	15.9439	0.453552
726	15.966	0.453552	15.966	0.453552	15.966	0.453552	15.966	0.453552	15.966	0.453552	15.966	0.453552	15.966	0.453552
727	15.988	0.453552	15.988	0.453552	15.988	0.453552	15.988	0.453552	15.988	0.453552	15.988	0.453552	15.988	0.453552
728	16.01	0.453552	16.01	0.453552	16.01	0.453552	16.01	0.453552	16.01	0.453552	16.01	0.453552	16.01	0.453552
729	16.032	0.453552	16.032	0.453552	16.032	0.453552	16.032	0.453552	16.032	0.453552	16.032	0.453552	16.032	0.453552
730	16.0541	0.453552	16.0541	0.453552	16.0541	0.453552	16.0541	0.453552	16.0541	0.453552	16.0541	0.453552	16.0541	0.453552
731	16.0761	0.453552	16.0761	0.453552	16.0761	0.453552	16.0761	0.453552	16.0761	0.453552	16.0761	0.453552	16.0761	0.453552
732	16.0981	0.453552	16.0981	0.453552	16.0981	0.453552	16.0981	0.453552	16.0981	0.453552	16.0981	0.453552	16.0981	0.453552
733	16.1201	0.453552	16.1201	0.453552	16.1201	0.453552	16.1201	0.453552	16.1201	0.453552	16.1201	0.453552	16.1201	0.453552
734	16.1421	0.453552	16.1421	0.453552	16.1421	0.453552	16.1421	0.453552	16.1421	0.453552	16.1421	0.453552	16.1421	0.453552
735	16.1642	0.453552	16.1642	0.453552	16.1642	0.453552	16.1642	0.453552	16.1642	0.453552	16.1642	0.453552	16.1642	0.453552
736	16.1862	0.453552	16.1862	0.453552	16.1862	0.453552	16.1862	0.453552	16.1862	0.453552	16.1862	0.453552	16.1862	0.453552
737	16.2082	0.453552	16.2082	0.453552	16.2082	0.453552	16.2082	0.453552	16.2082	0.453552	16.2082	0.453552	16.2082	0.453552
738	16.2302	0.453552	16.2302	0.453552	16.2302	0.453552	16.2302	0.453552	16.2302	0.453552	16.2302	0.453552	16.2302	0.453552
739	16.2523	0.453552	16.2523	0.453552	16.2523	0.453552	16.2523	0.453552	16.2523	0.453552	16.2523	0.453552	16.2523	0.453552
740	16.2743	0.453552	16.2743	0.453552	16.2743	0.453552	16.2743	0.453552	16.2743	0.453552	16.2743	0.453552	16.2743	0.453552
741	16.2963	0.453552	16.2963	0.453552	16.2963	0.453552	16.2963	0.453552	16.2963	0.453552	16.2963	0.453552	16.2963	0.453552
742	16.3183	0.453552	16.3183	0.453552	16.3183	0.453552	16.3183	0.453552	16.3183	0.453552	16.3183	0.453552	16.3183	0.453552
743	16.3403	0.453552	16.3403	0.453552	16.3403	0.453552	16.3403	0.453552	16.3403	0.453552	16.3403	0.453552	16.3403	0.453552
744	16.3624	0.453552	16.3624	0.453552	16.3624	0.453552	16.3624	0.453552	16.3624	0.453552	16.3624	0.453552	16.3624	0.453552
745	16.3844	0.453552	16.3844	0.453552	16.3844	0.453552	16.3844	0.453552	16.3844	0.453552	16.3844	0.453552	16.3844	0.453552
746	16.4064	0.453552	16.4064	0.453552	16.4064	0.453552	16.4064	0.453552	16.4064	0.453552	16.4064	0.453552	16.4064	0.453552
747	16.4284	0.453552	16.4284	0.453552	16.4284	0.453552	16.4284	0.453552	16.4284	0.453552	16.4284	0.453552	16.4284	0.453552
748	16.4505	0.453552	16.4505	0.453552	16.4505	0.453552	16.4505	0.453552	16.4505	0.453552	16.4505	0.453552	16.4505	0.453552
749	16.4725	0.453552	16.4725	0.453552	16.4725	0.453552	16.4725	0.453552	16.4725	0.453552	16.4725	0.453552	16.4725	0.453552
750	16.4945	0.453552	16.4945	0.453552	16.4945	0.453552	16.4945	0.453552	16.4945	0.453552	16.4945	0.453552	16.4945	0.453552
751	16.5165	0.453552	16.5165	0.453552	16.5165	0.453552	16.5165	0.453552	16.5165	0.453552	16.5165	0.453552	16.5165	0.453552
752	16.5385	0.453552	16.5385	0.453552	16.5385	0.453552	16.5385	0.453552	16.5385	0.453552	16.5385	0.453552	16.5385	0.453552
753	16.5606	0.453552	16.5606	0.453552	16.5606	0.453552	16.5606	0.453552	16.5606	0.453552	16.5606	0.453552	16.5606	0.453552
754	16.5826	0.453552	16.5826	0.453552	16.5826	0.453552	16.5826	0.453552	16.5826	0.453552	16.5826	0.453552	16.5826	0.453552
755	16.6046	0.453552	16.6046	0.453552	16.6046	0.453552	16.6046	0.453552	16.6046	0.453552	16.6046	0.453552	16.6046	0.453552
756	16.6266	0.453552	16.6266	0.453552	16.6266	0.453552	16.6266	0.453552	16.6266	0.453552	16.6266	0.453552	16.6266	0.453552
757	16.6486	0.453552	16.6486	0.453552	16.6486	0.453552	16.6486	0.453552	16.6486	0.453552	16.6486	0.453552	16.6486	0.453552
758	16.6707	0.453552	16.6707	0.453552	16.6707	0.453552	16.6707	0.453552	16.6707	0.453552	16.6707	0.453552	16.6707	0.453552
759	16.6927	0.453552	16.6927	0.453552	16.6927	0.453552	16.6927	0.453552	16.6927	0.453552	16.6927	0.453552	16.6927	0.453552
760	16.7147	0.453552	16.7147	0.453552	16.7147	0.453552	16.7147	0.453552	16.7147	0.453552	16.7147	0.453552	16.7147	0.453552
761	16.7367	0.453552	16.7367	0.453552	16.7367	0.453552	16.7367	0.453552	16.7367	0.453552	16.7367	0.453552	16.7367	0.453552
762	16.7588	0.453552	16.7588	0.453552	16.7588	0.453552	16.7588	0.453552	16.7588	0.453552	16.7588	0.453552	16.7588	0.453552
763	16.7808	0.453552	16.7808	0.453552	16.7808	0.453552	16.7808	0.453552	16.7808	0.453552	16.7808	0.453552	16.7808	0.453552
764	16.8028	0.453552	16.8028	0.453552	16.8028	0.453552	16.8028	0.453552	16.8028	0.453552	16.8028	0.453552	16.8028	0.453552
765	16.8248	0.453552	16.8248	0.453552	16.8248	0.453552	16.8248	0.453552	16.8248	0.453552	16.8248	0.453552	16.8248	0.453552
766	16.8468	0.453552	16.8468	0.453552	16.8468	0.453552	16.8468	0.453552	16.8468	0.453552	16.8468	0.453552	16.8468	0.453552
767	16.8689	0.453552	16.8689	0.453552	16.8689	0.453552	16.8689	0.453552	16.8689	0.453552	16.8689	0.453552	16.8689	0.453552
768	16.8909	0.453552	16.8909	0.453552	16.8909	0.453552	16.8909	0.453552	16.8909	0.453552	16.8909	0.453552	16.8909	0.453552
769	16.9129	0.453552	16.9129	0.453552	16.9129	0.453552	16.9129	0.453552	16.9129	0.453552	16.9129	0.453552	16.9129	0.453552
770	16.9349	0.453552	16.9349	0.453552	16.9349	0.453552	16.9349	0.453552	16.9349	0.453552	16.9349	0.453552	16.9349	0.453552
771	16.957	0.453552	16.957	0.453552	16.957	0.453552	16.957	0.453552	16.957	0.453552	16.957	0.453552	16.957	0.453552
772	16.979	0.453552	16.979	0.453552	16.979	0.453552	16.979	0.453552	16.979	0.453552	16.979	0.453552	16.979	0.453552
773	17.001	0.453552	17.001	0.453552	17.001	0.453552	17.001	0.453552	17.001	0.453552	17.001	0.453552	17.001	0.453552
774	17.023	0.453552	17.023	0.453552	17.023	0.453552	17.023	0.453552	17.023	0.453552	17.023	0.453552	17.023	0.453552
775	17.045	0.453552	17.045	0.453552	17.045	0.453552	17.045	0.453552	17.045	0.453552	17.045	0.453552	17.045	0.453552
776	17.0671	0.453552	17.0671	0.453552	17.0671	0.453552	17.0671	0.453552	17.0671	0.453552	17.0671	0.453552	17.0671	0.453552
777	17.0891	0.453552	17.0891	0.453552	17.0891	0.453552	17.0891	0.453552	17.0891	0.453552	17.0891	0.453552	17.0891	0.453552
778	17.1111	0.453552	17.1111	0.453552	17.1111	0.453552	17.1111	0.453552	17.1111	0.453552	17.1111	0.453552	17.1111	0.453552
779	17.1331	0.453552	17.1331	0.453552	17.1331	0.453552	17.1331	0.453552	17.1331	0.453552	17.1331	0.453552	17.1331	0.453552
780	17.1552	0.453552	17.1552	0.453552	17.1552	0.453552	17.1552	0.453552	17.1552	0.453552	17.1552	0.453552	17.1552	0.453552
781	17.1772	0.453552	17.1772	0.453552	17.1772	0.453552	17.1772	0.453552	17.1772	0.453552	17.1772	0.453552	17.1772	0.453552
782	17.1992	0.453552	17.1992	0.453552	17.1992	0.453552	17.1992	0.453552	17.1992	0.453552	17.1992	0.453552	17.1992	0.453552
783	17.2212	0.453552	17.2212	0.453552	17.2212	0.453552	17.2212	0.453552	17.2212	0.453552	17.2212	0.453552	17.2212	0.453552
784	17.2432	0.453552	17.2432	0.453552	17.2432	0.453552	17.2432	0.453552	17.2432	0.453552	17.2432	0.453552	17.2432	0.453552
785	17.2653	0.453552	17.2653	0.453552	17.2653	0.453552	17.2653	0.453552	17.2653	0.453552	17.2653	0.453552	17.2653	0.453552
786	17.2873	0.453552	17.2873	0.453552	17.2873	0.453552	17.2873	0.453552	17.2873	0.453552	17.2873	0.453552	17.2873	0.453552
787	17.3093	0.453552	17.3093	0.453552	17.3093	0.453552	17.3093	0.453552	17.3093	0.453552	17.3093	0.453552	17.3093	0.453552
788	17.3313	0.453552	17.3313	0.453552	17.3313	0.453552	17.3313	0.453552	17.3313	0.453552	17.3313	0.453552	17.3313	0.453552
789	17.3534	0.453552	17.3534	0.453552	17.3534	0.453552	17.3534	0.453552	17.3534	0.453552	17.3534	0.453552	17.3534	0.453552
790	17.3754	0.453552	17.3754	0.453552	17.3754	0.453552	17.3754	0.453552	17.3754	0.453552	17.3754	0.453552	17.3754	0.453552
791	17.3974	0.453552	17.3974	0.453552	17.3974	0.453552	17.3974	0.453552	17.3974	0.453552	17.3974	0.453552	17.3974	0.453552
792	17.4194	0.453552	17.4194	0.453552	17.4194	0.453552	17.4194	0.453552	17.4194	0.453552	17.4194	0.453552	17.4194	0.453552
793	17.4414	0.453552	17.4414	0.453552	17.4414	0.453552	17.4414	0.453552	17.4414	0.453552	17.4414	0.453552	17.4414	0.453552
794	17.4635	0.453552	17.4635	0.453552	17.4635	0.453552	17.4635	0.453552	17.4635	0.453552	17.4635	0.453552	17.4635	0.453552
795	17.4855	0.453552	17.4855	0.453552	17.4855	0.453552	17.4855	0.453552	17.4855	0.453552	17.4855	0.453552	17.4855	0.453552
796	17.5075	0.453552	17.5075	0.453552	17.5075	0.453552	17.5075	0.453552	17.5075	0.453552	17.5075	0.453552	17.5075	0.453552
797	17.5295	0.453552	17.5295	0.453552	17.5295	0.453552	17.5295	0.453552	17.5295	0.453552	17.5295	0.453552	17.5295	0.453552
798	17.5516	0.453552	17.5516	0.453552	17.5516	0.453552	17.5516	0.453552	17.5516	0.453552	17.5516	0.453552	17.5516	0.453552
799	17.5736	0.453552	17.5736	0.453552	17.5736	0.453552	17.5736	0.453552	17.5736	0.453552	17.5736	0.453552	17.5736	0.453552
800	17.5956	0.453552	17.5956	0.453552	17.5956	0.453552	17.5956	0.453552	17.5956	0.453552	17.5956	0.453552	17.5956	0.453552
801	17.6176	0.453552	17.6176	0.453552	17.6176	0.453552	17.6176	0.453552	17.6176	0.453552	17.6176	0.453552	17.6176	0.453552
802	17.6396	0.453552	17.6396	0.453552	17.6396	0.453552	17.6396	0.453552	17.6396	0.453552	17.6396	0.453552	17.6396	0.453552
803	17.6617	0.453552	17.6617	0.453552	17.6617	0.453552	17.6617	0.453552	17.6617	0.453552	17.6617	0.453552	17.6617	0.453552
804	17.6837	0.453552	17.6837	0.453552	17.6837	0.453552	17.6837	0.453552	17.6837	0.453552	17.6837	0.453552	17.6837	0.453552
805	17.7057	0.453552	17.7057	0.453552	17.7057	0.453552	17.7057	0.453552	17.7057	0.453552	17.7057	0.453552	17.7057	0.453552
806	17.7277	0.453552	17.7277	0.453552	17.7277	0.453552	17.7277	0.453552	17.7277	0.453552	17.7277	0.453552	17.7277	0.453552
807	17.7497	0.453552	17.7497	0.453552	17.7497	0.453552	17.7497	0.453552	17.7497	0.453552	17.7497	0.453552	17.7497	0.453552
808	17.7718	0.453552	17.7718	0.453552	17.7718	0.453552	17.7718	0.453552	17.7718	0.453552	17.7718	0.453552	17.7718	0.453552
809	17.7938	0.453552	17.7938	0.453552	17.7938	0.453552	17.7938	0.453552	17.7938	0.453552	17.7938	0.453552	17.7938	0.453552
810	17.8158	0.453552	17.8158	0.453552	17.8158	0.453552	17.8158	0.453552	17.8158	0.453552	17.8158	0.453552	17.8158	0.453552
811	17.8378	0.453552	17.8378	0.453552	17.8378	0.453552	17.8378	0.453552	17.8378	0.453552	17.8378	0.453552	17.8378	0.453552
812	17.8599	0.453552	17.8599	0.453552	17.8599	0.453552	17.8599	0.453552	17.8599	0.453552	17.8599	0.453552	17.8599	0.453552
813	17.8819	0.453552	17.8819	0.453552	17.8819	0.453552	17.8819	0.453552	17.8819	0.453552	17.8819	0.453552	17.8819	0.453552
814	17.9039	0.453552	17.9039	0.453552	17.9039	0.453552	17.9039	0.453552	17.9039	0.453552	17.9039	0.453552	17.9039	0.453552
815	17.9259	0.453552	17.9259	0.453552	17.9259	0.453552	17.9259	0.453552	17.9259	0.453552	17.9259	0.453552	17.9259	0.453552
816	17.9479	0.453552	17.9479	0.453552	17.9479	0.453552	17.9479	0.453552	17.9479	0.453552	17.9479	0.453552	17.9479	0.453552
817	17.97	0.453552	17.97	0.453552	17.97	0.453552	17.97	0.453552	17.97	0.453552	17.97	0.453552	17.97	0.453552
818	17.992	0.453552	17.992	0.453552	17.992	0.453552	17.992	0.453552	17.992	0.453552	17.992	0.453552	17.992	0.453552
819	18.014	0.453552	18.014	0.453552	18.014	0.453552	18.014	0.453552	18.014	0.453552	18.014	0.453552	18.014	0.453552
820	18.036	0.453552	18.036	0.453552	18.036	0.453552	18.036	0.453552	18.036	0.453552	18.036	0.453552	18.036	0.453552
821	18.0581	0.453552	18.0581	0.453552	18.0581	0.453552	18.0581	0.453552	18.0581	0.453552	18.0581	0.453552	18.0581	0.453552
822	18.0801	0.453552	18.0801	0.453552	18.0801	0.453552	18.0801	0.453552	18.0801	0.453552	18.0801	0.453552	18.0801	0.453552
823	18.1021	0.453552	18.1021	0.453552	18.1021	0.453552	18.1021	0.453552	18.1021	0.453552	18.1021	0.453552	18.1021	0.453552
824	18.1241	0.453552	18.1241	0.453552	18.1241	0.453552	18.1241	0.453552	18.1241	0.453552	18.1241	0.453552	18.1241	0.453552
825	18.1461	0.453552	18.1461	0.453552	18.1461	0.453552	18.1461	0.453552	18.1461	0.453552	18.1461	0.453552	18.1461	0.453552
826	18.1682	0.453552	18.1682	0.453552	18.1682	0.453552	18.1682	0.453552	18.1682	0.453552	18.1682	0.453552	18.1682	0.453552
827	18.1902	0.453552	18.1902	0.453552	18.1902	0.453552	18.1902	0.453552	18.1902	0.453552	18.1902	0.453552	18.1902	0.453552
828	18.2122	0.453552	18.2122	0.453552	18.2122	0.453552	18.2122	0.453552	18.2122	0.453552	18.2122	0.453552	18.2122	0.453552
829	18.2342	0.453552	18.2342	0.453552	18.2342	0.453552	18.2342	0.453552	18.2342	0.453552	18.2342	0.453552	18.2342	0.453552
830	18.2563	0.453552	18.2563	0.453552	18.2563	0.453552	18.2563	0.453552	18.2563	0.453552	18.2563	0.453552	18.2563	0.453552
831	18.2783	0.453552	18.2783	0.453552	18.2783	0.453552	18.2783	0.453552	18.2783	0.453552	18.2783	0.453552	18.2783	0.453552
832	18.3003	0.453552	18.3003	0.453552	18.3003	0.453552	18.3003	0.453552	18.3003	0.453552	18.3003	0.453552	18.3003	0.453552
833	18.3223	0.453552	18.3223	0.453552	18.3223	0.453552	18.3223	0.453552	18.3223	0.453552	18.3223	0.453552	18.3223	0.453552
834	18.3443	0.453552	18.3443	0.453552	18.3443	0.453552	18.3443	0.453552	18.3443	0.453552	18.3443	0.453552	18.3443	0.453552
835	18.3664	0.453552	18.3664	0.453552	18.3664	0.453552	18.3664	0.453552	18.3664	0.453552	18.3664	0.453552	18.3664	0.453552
836	18.3884	0.453552	18.3884	0.453552	18.3884	0.453552	18.3884	0.453552	18.3884	0.453552	18.3884	0.453552	18.3884	0.453552
837	18.4104	0.453552	18.4104	0.453552	18.4104	0.453552	18.4104	0.453552	18.4104	0.453552	18.4104	0.453552	18.4104	0.453552
838	18.4324	0.453552	18.4324	0.453552	18.4324	0.453552	18.4324	0.453552	18.4324	0.453552	18.4324	0.453552	18.4324	0.453552
839	18.4545	0.453552	18.4545	0.453552	18.4545	0.453552	18.4545	0.453552	18.4545	0.453552	18.4545	0.453552	18.4545	0.453552
840	18.4765	0.453552	18.4765	0.453552	18.4765	0.453552	18.4765	0.453552	18.4765	0.453552	18.4765	0.453552	18.4765	0.453552
841	18.4985	0.453552	18.4985	0.453552	18.4985	0.453552	18.4985	0.453552	18.4985	0.453552	18.4985	0.453552	18.4985	0.453552
842	18.5205	0.453552	18.5205	0.453552	18.5205	0.453552	18.5205	0.453552	18.5205	0.453552	18.5205	0.453552	18.5205	0.453552
843	18.5425	0.453552	18.5425	0.453552	18.5425	0.453552	18.5425	0.453552	18.5425	0.453552	18.5425	0.453552	18.5425	0.453552
844	18.5646	0.453552	18.5646	0.453552	18.5646	0.453552	18.5646	0.453552	18.5646	0.453552	18.5646	0.453552	18.5646	0.453552
845	18.5866	0.453552	18.5866	0.453552	18.5866	0.453552	18.5866	0.453552	18.5866	0.453552	18.5866	0.453552	18.5866	0.453552
846	18.6086	0.453552	18.6086	0.453552	18.6086	0.453552	18.6086	0.453552	18.6086	0.453552	18.6086	0.453552	18.6086	0.453552
847	18.6306	0.453552	18.6306	0.453552	18.6306	0.453552	18.6306	0.453552	18.6306	0.453552	18.6306	0.453552	18.6306	0.453552
848	18.6527	0.453552	18.6527	0.453552	18.6527	0.453552	18.6527	0.453552	18.6527	0.453552	18.6527	0.453552	18.6527	0.453552
849	18.6747	0.453552	18.6747	0.453552	18.6747	0.453552	18.6747	0.453552	18.6747	0.453552	18.6747	0.453552	18.6747	0.453552
850	18.6967	0.453552	18.6967	0.453552	18.6967	0.453552	18.6967	0.453552	18.6967	0.453552	18.6967	0.453552	18.6967	0.453552
851	18.7187	0.453552	18.7187	0.453552	18.7187	0.453552	18.7187	0.453552	18.7187	0.453552	18.7187	0.453552	18.7187	0.453552
852	18.7407	0.453552	18.7407	0.453552	18.7407	0.453552	18.7407	0.453552	18.7407	0.453552	18.7407	0.453552	18.7407	0.453552
853	18.7628	0.453552	18.7628	0.453552	18.7628	0.453552	18.7628	0.453552	18.7628	0.453552	18.7628	0.453552	18.7628	0.453552
854	18.7848	0.453552	18.7848	0.453552	18.7848	0.453552	18.7848	0.453552	18.7848	0.453552	18.7848	0.453552	18.7848	0.453552
855	18.8068	0.453552	18.8068	0.453552	18.8068	0.453552	18.8068	0.453552	18.8068	0.453552	18.8068	0.453552	18.8068	0.453552
856	18.8288	0.453552	18.8288	0.453552	18.8288	0.453552	18.8288	0.453552	18.8288	0.453552	18.8288	0.453552	18.8288	0.453552
857	18.8509	0.453552	18.8509	0.453552	18.8509	0.453552	18.8509	0.453552	18.8509	0.453552	18.8509	0.453552	18.8509	0.453552
858	18.8729	0.453552	18.8729	0.453552	18.8729	0.453552	18.8729	0.453552	18.8729	0.453552	18.8729	0.453552	18.8729	0.453552
859	18.8949	0.453552	18.8949	0.453552	18.8949	0.453552	18.8949	0.453552	18.8949	0.453552	18.8949	0.453552	18.8949	0.453552
860	18.9169	0.453552	18.9169	0.453552	18.9169	0.453552	18.9169	0.453552	18.9169	0.453552	18.9169	0.453552	18.9169	0.453552
861	18.9389	0.453552	18.9389	0.453552	18.9389	0.453552	18.9389	0.453552	18.9389	0.453552	18.9389	0.453552	18.9389	0.453552
862	18.961	0.453552	18.961	0.453552	18.961	0.453552	18.961	0.453552	18.961	0.453552	18.961	0.453552	18.961	0.453552
863	18.983	0.453552	18.983	0.453552	18.983	0.453552	18.983	0.453552	18.983	0.453552	18.983	0.453552	18.983	0.453552
864	19.005	0.453552	19.005	0.453552	19.005	0.453552	19.005	0.453552	19.005	0.453552	19.005	0.453552	19.005	0.453552
865	19.027	0.453552	19.027	0.453552	19.027	0.453552	19.027	0.453552	19.027	0.453552	19.027	0.453552	19.027	0.453552
866	19.049	0.453552	19.049	0.453552	19.049	0.453552	19.049	0.453552	19.049	0.453552	19.049	0.453552	19.049	0.453552
867	19.0711	0.453552	19.0711	0.453552	19.0711	0.453552	19.0711	0.453552	19.0711	0.453552	19.0711	0.453552	19.0711	0.453552
868	19.0931	0.453552	19.0931	0.453552	19.0931	0.453552	19.0931	0.453552	19.0931	0.453552	19.0931	0.453552	19.0931	0.453552
869	19.1151	0.453552	19.1151	0.453552	19.1151	0.453552	19.1151	0.453552	19.1151	0.453552	19.1151	0.453552	19.1151	0.453552
870	19.1371	0.453552	19.1371	0.453552	19.1371	0.453552	19.1371	0.453552	19.1371	0.453552	19.1371	0.453552	19.1371	0.453552
871	19.1592	0.453552	19.1592	0.453552	19.1592	0.453552	19.1592	0.453552	19.1592	0.453552	19.1592	0.453552	19.1592	0.453552
872	19.1812	0.453552	19.1812	0.453552	19.1812	0.453552	19.1812	0.453552	19.1812	0.453552	19.1812	0.453552	19.1812	0.453552
873	19.2032	0.453552	19.2032	0.453552	19.2032	0.453552	19.2032	0.453552	19.2032	0.453552	19.2032	0.453552	19.2032	0.453552
874	19.2252	0.453552	19.2252	0.453552	19.2252	0.453552	19.2252	0.453552	19.2252	0.453552	19.2252	0.453552	19.2252	0.453552
875	19.2472	0.453552	19.2472	0.453552	19.2472	0.453552	19.2472	0.453552	19.2472	0.453552	19.2472	0.453552	19.2472	0.453552
876	19.2693	0.453552	19.2693	0.453552	19.2693	0.453552	19.2693	0.453552	19.2693	0.453552	19.2693	0.453552	19.2693	0.453552
877	19.2913	0.453552	19.2913	0.453552	19.2913	0.453552	19.2913	0.453552	19.2913	0.453552	19.2913	0.453552	19.2913	0.453552
878	19.3133	0.453552	19.3133	0.453552	19.3133	0.453552	19.3133	0.453552	19.3133	0.453552	19.3133	0.453552	19.3133	0.453552
879	19.3353	0.453552	19.3353	0.453552	19.3353	0.453552	19.3353	0.453552	19.3353	0.453552	19.3353	0.453552	19.3353	0.453552
880	19.3574	0.453552	19.3574	0.453552	19.3574	0.453552	19.3574	0.453552	19.3574	0.453552	19.3574	0.453552	19.3574	0.453552
881	19.3794	0.453552	19.3794	0.453552	19.3794	0.453552	19.3794	0.453552	19.3794	0.453552	19.3794	0.453552	19.3794	0.453552
882	19.4014	0.453552	19.4014	0.453552	19.4014	0.453552	19.4014	0.453552	19.4014	0.453552	19.4014	0.453552	19.4014	0.453552
883	19.4234	0.453552	19.4234	0.453552	19.4234	0.453552	19.4234	0.453552	19.4234	0.453552	19.4234	0.453552	19.4234	0.453552
884	19.4454	0.453552	19.4454	0.453552	19.4454	0.453552	19.4454	0.453552	19.4454	0.453552	19.4454	0.453552	19.4454	0.453552
885	19.4675	0.453552	19.4675	0.453552	19.4675	0.453552	19.4675	0.453552	19.4675	0.453552	19.4675	0.453552	19.4675	0.453552
886	19.4895	0.453552	19.4895	0.453552	19.4895	0.453552	19.4895	0.453552	19.4895	0.453552	19.4895	0.453552	19.4895	0.453552
887	19.5115	0.453552	19.5115	0.453552	19.5115	0.453552	19.5115	0.453552	19.5115	0.453552	19.5115	0.453552	19.5115	0.453552
888	19.5335	0.453552	19.5335	0.453552	19.5335	0.453552	19.5335	0.453552	19.5335	0.453552	19.5335	0.453552	19.5335	0.453552
889	19.5556	0.453552	19.5556	0.453552	19.5556	0.453552	19.5556	0.453552	19.5556	0.453552	19.5556	0.453552	19.5556	0.453552
890	19.5776	0.453552	19.5776	0.453552	19.5776	0.453552	19.5776	0.453552	19.5776	0.453552	19.5776	0.453552	19.5776	0.453552
891	19.5996	0.453552	19.5996	0.453552	19.5996	0.453552	19.5996	0.453552	19.5996	0.453552	19.5996	0.453552	19.5996	0.453552
892	19.6216	0.453552	19.6216	0.453552	19.6216	0.453552	19.6216	0.453552	19.6216	0.453552	19.6216	0.453552	19.6216	0.453552
893	19.6436	0.453552	19.6436	0.453552	19.6436	0.453552	19.6436	0.453552	19.6436	0.453552	19.6436	0.453552	19.6436	0.453552
894	19.6657	0.453552	19.6657	0.453552	19.6657	0.453552	19.6657	0.453552	19.6657	0.453552	19.6657	0.453552	19.6657	0.453552
895	19.6877	0.453552	19.6877	0.453552	19.6877	0.453552	19.6877	0.453552	19.6877	0.453552	19.6877	0.453552	19.6877	0.453552
896	19.7097	0.453552	19.7097	0.453552	19.7097	0.453552	19.7097	0.453552	19.7097	0.453552	19.7097	0.453552	19.7097	0.453552
897	19.7317	0.453552	19.7317	0.453552	19.7317	0.453552	19.7317	0.453552	19.7317	0.453552	19.7317	0.453552	19.7317	0.453552
898	19.7538	0.453552	19.7538	0.453552	19.7538	0.453552	19.7538	0.453552	19.7538	0.453552	19.7538	0.453552	19.7538	0.453552
899	19.7758	0.453552	19.7758	0.453552	19.7758	0.453552	19.7758	0.453552	19.7758	0.453552	19.7758	0.453552	19.7758	0.453552
900	19.7978	0.453552	19.7978	0.453552	19.7978	0.453552	19.7978	0.453552	19.7978	0.453552	19.7978	0.453552	19.7978	0.453552
901	19.8198	0.453552	19.8198	0.453552	19.8198	0.453552	19.8198	0.453552	19.8198	0.453552	19.8198	0.453552	19.8198	0.453552
902	19.8418	0.453552	19.8418	0.453552	19.8418	0.453552	19.8418	0.453552	19.8418	0.453552	19.8418	0.453552	19.8418	0.453552
903	19.8639	0.453552	19.8639	0.453552	19.8639	0.453552	19.8639	0.453552	19.8639	0.453552	19.8639	0.453552	19.8639	0.453552
904	19.8859	0.453552	19.8859	0.453552	19.8859	0.453552	19.8859	0.453552	19.8859	0.453552	19.8859	0.453552	19.8859	0.453552
905	19.9079	0.453552	19.9079	0.453552	19.9079	0.453552	19.9079	0.453552	19.9079	0.453552	19.9079	0.453552	19.9079	0.453552
906	19.9299	0.453552	19.9299	0.453552	19.9299	0.453552	19.9299	0.453552	19.9299	0.453552	19.9299	0.453552	19.9299	0.453552
907	19.952	0.453552	19.952	0.453552	19.952	0.453552	19.952	0.453552	19.952	0.453552	19.952	0.453552	19.952	0.453552
908	19.974	0.453552	19.974	0.453552	19.974	0.453552	19.974	0.453552	19.974	0.453552	19.974	0.453552	19.974	0.453552
909	19.996	0.453552	19.996	0.453552	19.996	0.453552	19.996	0.453552	19.996	0.453552	19.996	0.453552	19.996	0.453552
910	20.018	0.453552	20.018	0.453552	20.018	0.453552	20.018	0.453552	20.018	0.453552	20.018	0.453552	20.018	0.453552
911	20.04	0.453552	20.04	0.453552	20.04	0.453552	20.04	0.453552	20.04	0.453552	20.04	0.453552	20.04	0.453552
912	20.0621	0.453552	20.0621	0.453552	20.0621	0.453552	20.0621	0.453552	20.0621	0.453552	20.0621	0.453552	20.0621	0.453552
913	20.0841	0.453552	20.0841	0.453552	20.0841	0.453552	20.0841	0.453552	20.0841	0.453552	20.0841	0.453552	20.0841	0.453552
914	20.1061	0.453552	20.1061	0.453552	20.1061	0.453552	20.1061	0.453552	20.1061	0.453552	20.1061	0.453552	20.1061	0.453552
915	20.1281	0.453552	20.1281	0.453552	20.1281	0.453552	20.1281	0.453552	20.1281	0.453552	20.1281	0.453552	20.1281	0.453552
916	20.1502	0.453552	20.1502	0.453552	20.1502	0.453552	20.1502	0.453552	20.1502	0.453552	20.1502	0.453552	20.1502	0.453552
917	20.1722	0.453552	20.1722	0.453552	20.1722	0.453552	20.1722	0.453552	20.1722	0.453552	20.1722	0.453552	20.1722	0.453552
918	20.1942	0.453552	20.1942	0.453552	20.1942	0.453552	20.1942	0.453552	20.1942	0.453552	20.1942	0.453552	20.1942	0.453552
919	20.2162	0.453552	20.2162	0.453552	20.2162	0.453552	20.2162	0.453552	20.2162	0.453552	20.2162	0.453552	20.2162	0.453552
920	20.2382	0.453552	20.2382	0.453552	20.2382	0.453552	20.2382	0.453552	20.2382	0.453552	20.2382	0.453552	20.2382	0.453552
921	20.2603	0.453552	20.2603	0.453552	20.2603	0.453552	20.2603	0.453552	20.2603	0.453552	20.2603	0.453552	20.2603	0.453552
922	20.2823	0.453552	20.2823	0.453552	20.2823	0.453552	20.2823	0.453552	20.2823	0.453552	20.2823	0.453552	20.2823	0.453552
923	20.3043	0.453552	20.3043	0.453552	20.3043	0.453552	20.3043	0.453552	20.3043	0.453552	20.3043	0.453552	20.3043	0.453552
924	20.3263	0.453552	20.3263	0.453552	20.3263	0.453552	20.3263	0.453552	20.3263	0.453552	20.3263	0.453552	20.3263	0.453552
925	20.3483	0.453552	20.3483	0.453552	20.3483	0.453552	20.3483	0.453552	20.3483	0.453552	20.3483	0.453552	20.3483	0.453552
926	20.3704	0.453552	20.3704	0.453552	20.3704	0.453552	20.3704	0.453552	20.3704	0.453552	20.3704	0.453552	20.3704	0.453552
927	20.3924	0.453552	20.3924	0.453552	20.3924	0.453552	20.3924	0.453552	20.3924	0.453552	20.3924	0.453552	20.3924	0.453552
928	20.4144	0.453552	20.4144	0.453552	20.4144	0.453552	20.4144	0.453552	20.4144	0.453552	20.4144	0.453552	20.4144	0.453552
929	20.4364	0.453552	20.4364	0.453552	20.4364	0.453552	20.4364	0.453552	20.4364	0.453552	20.4364	0.453552	20.4364	0.453552
930	20.4585	0.453552	20.4585	0.453552	20.4585	0.453552	20.4585	0.453552	20.4585	0.453552	20.4585	0.453552	20.4585	0.453552
931	20.4805	0.453552	20.4805	0.453552	20.4805	0.453552	20.4805	0.453552	20.4805	0.453552	20.4805	0.453552	20.4805	0.453552
932	20.5025	0.453552	20.5025	0.453552	20.5025	0.453552	20.5025	0.453552	20.5025	0.453552	20.5025	0.453552	20.5025	0.453552
933	20.5245	0.453552	20.5245	0.453552	20.5245	0.453552	20.5245	0.453552	20.5245	0.453552	20.5245	0.453552	20.5245	0.453552
934	20.5465	0.453552	20.5465	0.453552	20.5465	0.453552	20.5465	0.453552	20.5465	0.453552	20.5465	0.453552	20.5465	0.453552
935	20.5686	0.453552	20.5686	0.453552	20.5686	0.453552	20.5686	0.453552	20.5686	0.453552	20.5686	0.453552	20.5686	0.453552
936	20.5906	0.453552	20.5906	0.453552	20.5906	0.453552	20.5906	0.453552	20.5906	0.453552	20.5906	0.453552	20.5906	0.453552
937	20.6126	0.453552	20.6126	0.453552	20.6126	0.453552	20.6126	0.453552	20.6126	0.453552	20.6126	0.453552	20.6126	0.453552
938	20.6346	0.453552	20.6346	0.453552	20.6346	0.453552	20.6346	0.453552	20.6346	0.453552	20.6346	0.453552	20.6346	0.453552
939	20.6567	0.453552	20.6567	0.453552	20.6567	0.453552	20.6567	0.453552	20.6567	0.453552	20.6567	0.453552	20.6567	0.453552
940	20.6787	0.453552	20.6787	0.453552	20.6787	0.453552	20.6787	0.453552	20.6787	0.453552	20.6787	0.453552	20.6787	0.453552
941	20.7007	0.453552	20.7007	0.453552	20.7007	0.453552	20.7007	0.453552	20.7007	0.453552	20.7007	0.453552	20.7007	0.453552
942	20.7227	0.453552	20.7227	0.453552	20.7227	0.453552	20.7227	0.453552	20.7227	0.453552	20.7227	0.453552	20.7227	0.453552
943	20.7447	0.453552	20.7447	0.453552	20.7447	0.453552	20.7447	0.453552	20.7447	0.453552	20.7447	0.453552	20.7447	0.453552
944	20.7668	0.453552	20.7668	0.453552	20.7668	0.453552	20.7668	0.453552	20.7668	0.453552	20.7668	0.453552	20.7668	0.453552
945	20.7888	0.453552	20.7888	0.453552	20.7888	0.453552	20.7888	0.453552	20.7888	0.453552	20.7888	0.453552	20.7888	0.453552
946	20.8108	0.453552	20.8108	0.453552	20.8108	0.453552	20.8108	0.453552	20.8108	0.453552	20.8108	0.453552	20.8108	0.453552
947	20.8328	0.453552	20.8328	0.453552	20.8328	0.453552	20.8328	0.453552	20.8328	0.453552	20.8328	0.453552	20.8328	0.453552
948	20.8549	0.453552	20.8549	0.453552	20.8549	0.453552	20.8549	0.453552	20.8549	0.453552	20.8549	0.453552	20.8549	0.453552
949	20.8769	0.453552	20.8769	0.453552	20.8769	0.453552	20.8769	0.453552	20.8769	0.453552	20.8769	0.453552	20.8769	0.453552
950	20.8989	0.453552	20.8989	0.453552	20.8989	0.453552	20.8989	0.453552	20.8989	0.453552	20.8989	0.453552	20.8989	0.453552
951	20.9209	0.453552	20.9209	0.453552	20.9209	0.453552	20.9209	0.453552	20.9209	0.453552	20.9209	0.453552	20.9209	0.453552
952	20.9429	0.453552	20.9429	0.453552	20.9429	0.453552	20.9429	0.453552	20.9429	0.453552	20.9429	0.453552	20.9429	0.453552
953	20.965	0.453552	20.965	0.453552	20.965	0.453552	20.965	0.453552	20.965	0.453552	20.965	0.453552	20.965	0.453552
954	20.987	0.453552	20.987	0.453552	20.987	0.453552	20.987	0.453552	20.987	0.453552	20.987	0.453552	20.987	0.453552
955	21.009	0.453552	21.009	0.453552	21.009	0.453552	21.009	0.453552	21.009	0.453552	21.009	0.453552	21.009	0.453552
956	21.031	0.453552	21.031	0.453552	21.031	0.453552	21.031	0.453552	21.031	0.453552	21.031	0.453552	21.031	0.453552
957	21.0531	0.453552	21.0531	0.453552	21.0531	0.453552	21.0531	0.453552	21.0531	0.453552	21.0531	0.453552	21.0531	0.453552
958	21.0751	0.453552	21.0751	0.453552	21.0751	0.453552	21.0751	0.453552	21.0751	0.453552	21.0751	0.453552	21.0751	0.453552
959	21.0971	0.453552	21.0971	0.453552	21.0971	0.453552	21.0971	0.453552	21.0971	0.453552	21.0971	0.453552	21.0971	0.453552
960	21.1191	0.453552	21.1191	0.453552	21.1191	0.453552	21.1191	0.453552	21.1191	0.453552	21.1191	0.453552	21.1191	0.453552
961	21.1411	0.453552	21.1411	0.453552	21.1411	0.453552	21.1411	0.453552	21.1411	0.453552	21.1411	0.453552	21.1411	0.453552
962	21.1632	0.453552	21.1632	0.453552	21.1632	0.453552	21.1632	0.453552	21.1632	0.453552	21.1632	0.453552	21.1632	0.453552
963	21.1852	0.453552	21.1852	0.453552	21.1852	0.453552	21.1852	0.453552	21.1852	0.453552	21.1852	0.453552	21.1852	0.453552
964	21.2072	0.453552	21.2072	0.453552	21.2072	0.453552	21.2072	0.453552	21.2072	0.453552	21.2072	0.453552	21.2072	0.453552
965	21.2292	0.453552	21.2292	0.453552	21.2292	0.453552	21.2292	0.453552	21.2292	0.453552	21.2292	0.453552	21.2292	0.453552
966	21.2513	0.453552	21.2513	0.453552	21.2513	0.453552	21.2513	0.453552	21.2513	0.453552	21.2513	0.453552	21.2513	0.453552
967	21.2733	0.453552	21.2733	0.453552	21.2733	0.453552	21.2733	0.453552	21.2733	0.453552	21.2733	0.453552	21.2733	0.453552
968	21.2953	0.453552	21.2953	0.453552	21.2953	0.453552	21.2953	0.453552	21.2953	0.453552	21.2953	0.453552	21.2953	0.453552
969	21.3173	0.453552	21.3173	0.453552	21.3173	0.453552	21.3173	0.453552	21.3173	0.453552	21.3173	0.453552	21.3173	0.453552
970	21.3393	0.453552	21.3393	0.453552	21.3393	0.453552	21.3393	0.453552	21.3393	0.453552	21.3393	0.453552	21.3393	0.453552
971	21.3614	0.453552	21.3614	0.453552	21.3614	0.453552	21.3614	0.453552	21.3614	0.453552	21.3614	0.453552	21.3614	0.453552
972	21.3834	0.453552	21.3834	0.453552	21.3834	0.453552	21.3834	0.453552	21.3834	0.453552	21.3834	0.453552	21.3834	0.453552
973	21.4054	0.453552	21.4054	0.453552	21.4054	0.453552	21.4054	0.453552	21.4054	0.453552	21.4054	0.453552	21.4054	0.453552
974	21.4274	0.453552	21.4274	0.453552	21.4274	0.453552	21.4274	0.453552	21.4274	0.453552	21.4274	0.453552	21.4274	0.453552
975	21.4494	0.453552	21.4494	0.453552	21.4494	0.453552	21.4494	0.453552	21.4494	0.453552	21.4494	0.453552	21.4494	0.453552
976	21.4715	0.453552	21.4715	0.453552	21.4715	0.453552	21.4715	0.453552	21.4715	0.453552	21.4715	0.453552	21.4715	0.453552
977	21.4935	0.453552	21.4935	0.453552	21.4935	0.453552	21.4935	0.453552	21.4935	0.453552	21.4935	0.453552	21.4935	0.453552
978	21.5155	0.453552	21.5155	0.453552	21.5155	0.453552	21.5155	0.453552	21.5155	0.453552	21.5155	0.453552	21.5155	0.453552
979	21.5375	0.453552	21.5375	0.453552	21.5375	0.453552	21.5375	0.453552	21.5375	0.453552	21.5375	0.453552	21.5375	0.453552
980	21.5596	0.453552	21.5596	0.453552	21.5596	0.453552	21.5596	0.453552	21.5596	0.453552	21.5596	0.453552	21.5596	0.453552
981	21.5816	0.453552	21.5816	0.453552	21.5816	0.453552	21.5816	0.453552	21.5816	0.453552	21.5816	0.453552	21.5816	0.453552
982	21.6036	0.453552	21.6036	0.453552	21.6036	0.453552	21.6036	0.453552	21.6036	0.453552	21.6036	0.453552	21.6036	0.453552
983	21.6256	0.453552	21.6256	0.453552	21.6256	0.453552	21.6256	0.453552	21.6256	0.453552	21.6256	0.453552	21.6256	0.453552
984	21.6476	0.453552	21.6476	0.453552	21.6476	0.453552	21.6476	0.453552	21.6476	0.453552	21.6476	0.453552	21.6476	0.453552
985	21.6697	0.453552	21.6697	0.453552	21.6697	0.453552	21.6697	0.453552	21.6697	0.453552	21.6697	0.453552	21.6697	0.453552
986	21.6917	0.453552	21.6917	0.453552	21.6917	0.453552	21.6917	0.453552	21.6917	0.453552	21.6917	0.453552	21.6917	0.453552
987	21.7137	0.453552	21.7137	0.453552	21.7137	0.453552	21.7137	0.453552	21.7137	0.453552	21.7137	0.453552	21.7137	0.453552
988	21.7357	0.453552	21.7357	0.453552	21.7357	0.453552	21.7357	0.453552	21.7357	0.453552	21.7357	0.453552	21.7357	0.453552
989	21.7578	0.453552	21.7578	0.453552	21.7578	0.453552	21.7578	0.453552	21.7578	0.453552	21.7578	0.453552	21.7578	0.453552
990	21.7798	0.453552	21.7798	0.453552	21.7798	0.453552	21.7798	0.453552	21.7798	0.453552	21.7798	0.453552	21.7798	0.453552
991	21.8018	0.453552	21.8018	0.453552	21.8018	0.453552	21.8018	0.453552	21.8018	0.453552	21.8018	0.453552	21.8018	0.453552
992	21.8238	0.453552	21.8238	0.453552	21.8238	0.453552	21.8238	0.453552	21.8238	0.453552	21.8238	0.453552	21.8238	0.453552
993	21.8458	0.453552	21.8458	0.453552	21.8458	0.453552	21.8458	0.453552	21.8458	0.453552	21.8458	0.453552	21.8458	0.453552
994	21.8679	0.453552	21.8679	0.453552	21.8679	0.453552	21.8679	0.453552	21.8679	0.453552	21.8679	0.453552	21.8679	0.453552
995	21.8899	0.453552	21.8899	0.453552	21.8899	0.453552	21.8899	0.453552	21.8899	0.453552	21.8899	0.453552	21.8899	0.453552
996	21.9119	0.453552	21.9119	0.453552	21.9119	0.453552	21.9119	0.453552	21.9119	0.453552	21.9119	0.453552	21.9119	0.453552
997	21.9339	0.453552	21.9339	0.453552	21.9339	0.453552	21.9339	0.453552	21.9339	0.453552	21.9339	0.453552	21.9339	0.453552
998	21.956	0.453552	21.956	0.453552	21.956	0.453552	21.956	0.453552	21.956	0.453552	21.956	0.453552	21.956	0.453552
999	21.978	0.453552	21.978	0.453552	21.978	0.453552	21.978	0.453552	21.978	0.453552	21.978	0.453552	21.978	0.453552
1000	22	0.453552	22	0.453552	22	0.453552	22	0.453552	22	0.453552	22	0.453552	22	0.453552

## Sheet: def_peru
Peru	actual period		2040_ssp370		2040_ssp585		2070_ssp370		2070_ssp585		2100_ssp370		2100_ssp585
	x	y	x	y	x	y	x	y	x	y	x	y	x	y
1	0	0.631859	0	0.752922	1.34334	0.746051	0	0.721735	1.34334	0.789389	1.34334	0.681404	0	0.715303
2	0.022022	0.631859	0.022022	0.752922	1.36537	0.746051	1.34334	0.671052	1.36537	0.789389	1.36537	0.681404	0.022022	0.715303
3	0.044044	0.631859	0.044044	0.752922	1.38739	0.746051	1.36537	0.671052	1.38739	0.789389	1.38739	0.681404	0.044044	0.715303
4	0.33033	0.613134	0.0660661	0.722335	1.40941	0.746051	1.38739	0.671052	1.40941	0.789389	1.40941	0.681404	0.0660661	0.68412
5	1.34334	0.608735	0.0880881	0.722335	1.43143	0.746051	1.40941	0.671052	1.43143	0.789389	1.43143	0.681404	0.0880881	0.68412
6	1.36537	0.608735	0.11011	0.722335	1.45345	0.746051	1.43143	0.671052	1.45345	0.789389	1.45345	0.681404	0.11011	0.68412
7	1.38739	0.608735	0.132132	0.722335	1.47548	0.746051	1.45345	0.671052	1.47548	0.789389	1.47548	0.681404	0.132132	0.68412
8	1.40941	0.608735	0.154154	0.722335	1.4975	0.746051	1.47548	0.671052	1.4975	0.789389	1.4975	0.681404	0.154154	0.68412
9	1.43143	0.608735	0.176176	0.722335	1.51952	0.746051	1.4975	0.671052	1.51952	0.789389	1.51952	0.681404	0.176176	0.68412
10	1.45345	0.608735	0.198198	0.722335	1.54154	0.746051	1.51952	0.671052	1.54154	0.789389	1.54154	0.681404	0.198198	0.68412
11	1.47548	0.608735	0.22022	0.722335	1.56356	0.746051	1.54154	0.671052	1.56356	0.789389	1.56356	0.681404	0.22022	0.68412
12	1.4975	0.608735	0.242242	0.722335	1.58559	0.746051	1.56356	0.671052	1.58559	0.789389	1.58559	0.681404	0.242242	0.68412
13	1.51952	0.608735	0.264264	0.722335	1.60761	0.746051	1.58559	0.671052	1.60761	0.789389	1.60761	0.681404	0.264264	0.68412
14	1.54154	0.608735	0.286286	0.722335	1.62963	0.746051	1.60761	0.671052	1.62963	0.789389	1.62963	0.681404	0.286286	0.68412
15	1.56356	0.608735	0.308308	0.722335	1.65165	0.746051	1.62963	0.671052	1.65165	0.789389	1.65165	0.681404	0.308308	0.68412
16	1.58559	0.608735	1.34334	0.700631	1.67367	0.746051	1.65165	0.671052	1.67367	0.789389	1.67367	0.681404	1.34334	0.657363
17	1.60761	0.608735	1.36537	0.700631	1.6957	0.746051	1.67367	0.671052	1.6957	0.789389	1.6957	0.681404	1.36537	0.657363
18	1.62963	0.608735	1.38739	0.700631	1.71772	0.746051	1.6957	0.671052	1.71772	0.789389	1.71772	0.681404	1.38739	0.657363
19	1.65165	0.608735	1.40941	0.700631	1.73974	0.746051	1.71772	0.671052	1.73974	0.789389	1.73974	0.681404	1.40941	0.657363
20	1.67367	0.608735	1.43143	0.700631	1.76176	0.746051	1.73974	0.671052	1.76176	0.789389	1.76176	0.681404	1.43143	0.657363
21	1.6957	0.608735	1.45345	0.700631	1.78378	0.746051	1.76176	0.671052	1.78378	0.789389	1.78378	0.681404	1.45345	0.657363
22	1.71772	0.608735	1.47548	0.700631	1.80581	0.746051	1.78378	0.671052	1.80581	0.789389	1.80581	0.681404	1.47548	0.657363
23	1.73974	0.608735	1.4975	0.700631	1.82783	0.746051	1.80581	0.671052	1.82783	0.789389	1.82783	0.681404	1.4975	0.657363
24	1.76176	0.608735	1.51952	0.700631	1.84985	0.746051	1.82783	0.671052	1.84985	0.789389	1.84985	0.681404	1.51952	0.657363
25	1.78378	0.608735	1.54154	0.700631	1.87187	0.746051	1.84985	0.671052	1.87187	0.789389	1.87187	0.681404	1.54154	0.657363
26	1.80581	0.608735	1.56356	0.700631	1.89389	0.746051	1.87187	0.671052	1.89389	0.789389	1.89389	0.681404	1.56356	0.657363
27	1.82783	0.608735	1.58559	0.700631	1.91592	0.746051	1.89389	0.671052	1.91592	0.789389	1.91592	0.681404	1.58559	0.657363
28	1.84985	0.608735	1.60761	0.700631	1.93794	0.746051	1.91592	0.671052	1.93794	0.789389	1.93794	0.681404	1.60761	0.657363
29	1.87187	0.608735	1.62963	0.700631	1.95996	0.746051	1.93794	0.671052	1.95996	0.789389	1.95996	0.681404	1.62963	0.657363
30	1.89389	0.608735	1.65165	0.700631	1.98198	0.746051	1.95996	0.671052	1.98198	0.789389	1.98198	0.681404	1.65165	0.657363
31	1.91592	0.608735	1.67367	0.700631	2.004	0.746051	1.98198	0.671052	2.004	0.789389	2.004	0.681404	1.67367	0.657363
32	1.93794	0.608735	1.6957	0.700631	2.02603	0.746051	2.004	0.671052	2.02603	0.789389	2.02603	0.681404	1.6957	0.657363
33	1.95996	0.608735	1.71772	0.700631	2.04805	0.746051	2.02603	0.671052	2.04805	0.789389	2.04805	0.681404	1.71772	0.657363
34	1.98198	0.608735	1.73974	0.700631	2.07007	0.746051	2.04805	0.671052	2.07007	0.789389	2.07007	0.681404	1.73974	0.657363
35	2.004	0.608735	1.76176	0.700631	2.09209	0.746051	2.07007	0.671052	2.09209	0.789389	2.09209	0.681404	1.76176	0.657363
36	2.02603	0.608735	1.78378	0.700631	2.11411	0.746051	2.09209	0.671052	2.11411	0.789389	2.11411	0.681404	1.78378	0.657363
37	2.04805	0.608735	1.80581	0.700631	2.13614	0.746051	2.11411	0.671052	2.13614	0.789389	2.13614	0.681404	1.80581	0.657363
38	2.07007	0.608735	1.82783	0.700631	2.15816	0.746051	2.13614	0.671052	2.15816	0.789389	2.15816	0.681404	1.82783	0.657363
39	2.09209	0.608735	1.84985	0.700631	2.18018	0.746051	2.15816	0.671052	2.18018	0.789389	2.18018	0.681404	1.84985	0.657363
40	2.11411	0.608735	1.87187	0.700631	2.2022	0.746051	2.18018	0.671052	2.2022	0.789389	2.2022	0.681404	1.87187	0.657363
41	2.13614	0.608735	1.89389	0.700631	2.22422	0.746051	2.2022	0.671052	2.22422	0.789389	2.22422	0.681404	1.89389	0.657363
42	2.15816	0.608735	1.91592	0.700631	2.24625	0.746051	2.22422	0.671052	2.24625	0.789389	2.24625	0.681404	1.91592	0.657363
43	2.18018	0.608735	1.93794	0.700631	2.26827	0.746051	2.24625	0.671052	2.26827	0.789389	2.26827	0.681404	1.93794	0.657363
44	2.2022	0.608735	1.95996	0.700631	2.29029	0.746051	2.26827	0.671052	2.29029	0.789389	2.29029	0.681404	1.95996	0.657363
45	2.22422	0.608735	1.98198	0.700631	2.31231	0.746051	2.29029	0.671052	2.31231	0.789389	2.31231	0.681404	1.98198	0.657363
46	2.24625	0.608735	2.004	0.700631	2.33433	0.746051	2.31231	0.671052	2.33433	0.789389	2.33433	0.681404	2.004	0.657363
47	2.26827	0.608735	2.02603	0.700631	2.35636	0.746051	2.33433	0.671052	2.35636	0.789389	2.35636	0.681404	2.02603	0.657363
48	2.29029	0.608735	2.04805	0.700631	2.37838	0.746051	2.35636	0.671052	2.37838	0.789389	2.37838	0.681404	2.04805	0.657363
49	2.31231	0.608735	2.07007	0.700631	2.4004	0.746051	2.37838	0.671052	2.4004	0.789389	2.4004	0.681404	2.07007	0.657363
50	2.33433	0.608735	2.09209	0.700631	2.42242	0.746051	2.4004	0.671052	2.42242	0.789389	2.42242	0.681404	2.09209	0.657363
51	2.35636	0.608735	2.11411	0.700631	2.44444	0.746051	2.42242	0.671052	2.44444	0.789389	2.44444	0.681404	2.11411	0.657363
52	2.37838	0.608735	2.13614	0.700631	2.46647	0.746051	2.44444	0.671052	2.46647	0.789389	2.46647	0.681404	2.13614	0.657363
53	2.4004	0.608735	2.15816	0.700631	2.48849	0.746051	2.46647	0.671052	2.48849	0.789389	2.48849	0.681404	2.15816	0.657363
54	2.42242	0.608735	2.18018	0.700631	2.51051	0.746051	2.48849	0.671052	2.51051	0.789389	2.51051	0.681404	2.18018	0.657363
55	2.44444	0.608735	2.2022	0.700631	2.53253	0.746051	2.51051	0.671052	2.53253	0.789389	2.53253	0.681404	2.2022	0.657363
56	2.46647	0.608735	2.22422	0.700631	2.55455	0.746051	2.53253	0.671052	2.55455	0.789389	2.55455	0.681404	2.22422	0.657363
57	2.48849	0.608735	2.24625	0.700631	2.57658	0.746051	2.55455	0.671052	2.57658	0.789389	2.57658	0.681404	2.24625	0.657363
58	2.51051	0.608735	2.26827	0.700631	2.5986	0.746051	2.57658	0.671052	2.5986	0.789389	2.5986	0.681404	2.26827	0.657363
59	2.53253	0.608735	2.29029	0.700631	2.62062	0.746051	2.5986	0.671052	2.62062	0.789389	2.62062	0.681404	2.29029	0.657363
60	2.55455	0.608735	2.31231	0.700631	2.64264	0.746051	2.62062	0.671052	2.64264	0.789389	2.64264	0.681404	2.31231	0.657363
61	2.57658	0.608735	2.33433	0.700631	2.66466	0.746051	2.64264	0.671052	2.66466	0.789389	2.66466	0.681404	2.33433	0.657363
62	2.5986	0.608735	2.35636	0.700631	2.68669	0.746051	2.66466	0.671052	2.68669	0.789389	2.68669	0.681404	2.35636	0.657363
63	2.62062	0.608735	2.37838	0.700631	2.70871	0.746051	2.68669	0.671052	2.70871	0.789389	2.70871	0.681404	2.37838	0.657363
64	2.64264	0.608735	2.4004	0.700631	2.73073	0.746051	2.70871	0.671052	2.73073	0.789389	2.73073	0.681404	2.4004	0.657363
65	2.66466	0.608735	2.42242	0.700631	2.75275	0.746051	2.73073	0.671052	2.75275	0.789389	2.75275	0.681404	2.42242	0.657363
66	2.68669	0.608735	2.44444	0.700631	2.77477	0.746051	2.75275	0.671052	2.77477	0.789389	2.77477	0.681404	2.44444	0.657363
67	2.70871	0.608735	2.46647	0.700631	2.7968	0.746051	2.77477	0.671052	2.7968	0.789389	2.7968	0.681404	2.46647	0.657363
68	2.73073	0.608735	2.48849	0.700631	2.81882	0.746051	2.7968	0.671052	2.81882	0.789389	2.81882	0.681404	2.48849	0.657363
69	2.75275	0.608735	2.51051	0.700631	2.84084	0.746051	2.81882	0.671052	2.84084	0.789389	2.84084	0.681404	2.51051	0.657363
70	2.77477	0.608735	2.53253	0.700631	2.86286	0.746051	2.84084	0.671052	2.86286	0.789389	2.86286	0.681404	2.53253	0.657363
71	2.7968	0.608735	2.55455	0.700631	2.88488	0.746051	2.86286	0.671052	2.88488	0.789389	2.88488	0.681404	2.55455	0.657363
72	2.81882	0.608735	2.57658	0.700631	2.90691	0.746051	2.88488	0.671052	2.90691	0.789389	2.90691	0.681404	2.57658	0.657363
73	2.84084	0.608735	2.5986	0.700631	2.92893	0.746051	2.90691	0.671052	2.92893	0.789389	2.92893	0.681404	2.5986	0.657363
74	2.86286	0.608735	2.62062	0.700631	2.95095	0.746051	2.92893	0.671052	2.95095	0.789389	2.95095	0.681404	2.62062	0.657363
75	2.88488	0.608735	2.64264	0.700631	2.97297	0.746051	2.95095	0.671052	2.97297	0.789389	2.97297	0.681404	2.64264	0.657363
76	2.90691	0.608735	2.66466	0.700631	2.99499	0.746051	2.97297	0.671052	2.99499	0.789389	2.99499	0.681404	2.66466	0.657363
77	2.92893	0.608735	2.68669	0.700631	3.01702	0.746051	2.99499	0.671052	3.01702	0.789389	3.01702	0.681404	2.68669	0.657363
78	2.95095	0.608735	2.70871	0.700631	3.03904	0.746051	3.01702	0.671052	3.03904	0.789389	3.03904	0.681404	2.70871	0.657363
79	2.97297	0.608735	2.73073	0.700631	3.06106	0.746051	3.03904	0.671052	3.06106	0.789389	3.06106	0.681404	2.73073	0.657363
80	2.99499	0.608735	2.75275	0.700631	3.08308	0.746051	3.06106	0.671052	3.08308	0.789389	3.08308	0.681404	2.75275	0.657363
81	3.01702	0.608735	2.77477	0.700631	3.10511	0.746051	3.08308	0.671052	3.10511	0.789389	3.10511	0.681404	2.77477	0.657363
82	3.03904	0.608735	2.7968	0.700631	3.12713	0.746051	3.10511	0.671052	3.12713	0.789389	3.12713	0.681404	2.7968	0.657363
83	3.06106	0.608735	2.81882	0.700631	3.14915	0.746051	3.12713	0.671052	3.14915	0.789389	3.14915	0.681404	2.81882	0.657363
84	3.08308	0.608735	2.84084	0.700631	3.17117	0.746051	3.14915	0.671052	3.17117	0.789389	3.17117	0.681404	2.84084	0.657363
85	3.10511	0.608735	2.86286	0.700631	3.19319	0.746051	3.17117	0.671052	3.19319	0.789389	3.19319	0.681404	2.86286	0.657363
86	3.12713	0.608735	2.88488	0.700631	3.21522	0.746051	3.19319	0.671052	3.21522	0.789389	3.21522	0.681404	2.88488	0.657363
87	3.14915	0.608735	2.90691	0.700631	3.23724	0.746051	3.21522	0.671052	3.23724	0.789389	3.23724	0.681404	2.90691	0.657363
88	3.17117	0.608735	2.92893	0.700631	3.25926	0.746051	3.23724	0.671052	3.25926	0.789389	3.25926	0.681404	2.92893	0.657363
89	3.19319	0.608735	2.95095	0.700631	3.28128	0.746051	3.25926	0.671052	3.28128	0.789389	3.28128	0.681404	2.95095	0.657363
90	3.21522	0.608735	2.97297	0.700631	3.3033	0.746051	3.28128	0.671052	3.3033	0.789389	3.3033	0.681404	2.97297	0.657363
91	3.23724	0.608735	2.99499	0.700631	3.32533	0.746051	3.3033	0.671052	3.32533	0.789389	3.32533	0.681404	2.99499	0.657363
92	3.25926	0.608735	3.01702	0.700631	3.34735	0.746051	3.32533	0.671052	3.34735	0.789389	3.34735	0.681404	3.01702	0.657363
93	3.28128	0.608735	3.03904	0.700631	3.36937	0.746051	3.34735	0.671052	3.36937	0.789389	3.36937	0.681404	3.03904	0.657363
94	3.3033	0.608735	3.06106	0.700631	3.39139	0.746051	3.36937	0.671052	3.39139	0.789389	3.39139	0.681404	3.06106	0.657363
95	3.32533	0.608735	3.08308	0.700631	3.41341	0.746051	3.39139	0.671052	3.41341	0.789389	3.41341	0.681404	3.08308	0.657363
96	3.34735	0.608735	3.10511	0.700631	3.43544	0.746051	3.41341	0.671052	3.43544	0.789389	3.43544	0.681404	3.10511	0.657363
97	3.36937	0.608735	3.12713	0.700631	3.45746	0.746051	3.43544	0.671052	3.45746	0.789389	3.45746	0.681404	3.12713	0.657363
98	3.39139	0.608735	3.14915	0.700631	3.47948	0.746051	3.45746	0.671052	3.47948	0.789389	3.47948	0.681404	3.14915	0.657363
99	3.41341	0.608735	3.17117	0.700631	3.5015	0.746051	3.47948	0.671052	3.5015	0.789389	3.5015	0.681404	3.17117	0.657363
100	3.43544	0.608735	3.19319	0.700631	3.52352	0.746051	3.5015	0.671052	3.52352	0.789389	3.52352	0.681404	3.19319	0.657363
101	3.45746	0.608735	3.21522	0.700631	3.54555	0.746051	3.52352	0.671052	3.54555	0.789389	3.54555	0.681404	3.21522	0.657363
102	3.47948	0.608735	3.23724	0.700631	3.56757	0.746051	3.54555	0.671052	3.56757	0.789389	3.56757	0.681404	3.23724	0.657363
103	3.5015	0.608735	3.25926	0.700631	3.58959	0.746051	3.56757	0.671052	3.58959	0.789389	3.58959	0.681404	3.25926	0.657363
104	3.52352	0.608735	3.28128	0.700631	3.61161	0.746051	3.58959	0.671052	3.61161	0.789389	3.61161	0.681404	3.28128	0.657363
105	3.54555	0.608735	3.3033	0.700631	3.63363	0.746051	3.61161	0.671052	3.63363	0.789389	3.63363	0.681404	3.3033	0.657363
106	3.56757	0.608735	3.32533	0.700631	3.65566	0.746051	3.63363	0.671052	3.65566	0.789389	3.65566	0.681404	3.32533	0.657363
107	3.58959	0.608735	3.34735	0.700631	3.67768	0.746051	3.65566	0.671052	3.67768	0.789389	3.67768	0.681404	3.34735	0.657363
108	3.61161	0.608735	3.36937	0.700631	3.6997	0.746051	3.67768	0.671052	3.6997	0.789389	3.6997	0.681404	3.36937	0.657363
109	3.63363	0.608735	3.39139	0.700631	3.72172	0.746051	3.6997	0.671052	3.72172	0.789389	3.72172	0.681404	3.39139	0.657363
110	3.65566	0.608735	3.41341	0.700631	3.74374	0.746051	3.72172	0.671052	3.74374	0.789389	3.74374	0.681404	3.41341	0.657363
111	3.67768	0.608735	3.43544	0.700631	3.76577	0.746051	3.74374	0.671052	3.76577	0.789389	3.76577	0.681404	3.43544	0.657363
112	3.6997	0.608735	3.45746	0.700631	3.78779	0.746051	3.76577	0.671052	3.78779	0.789389	3.78779	0.681404	3.45746	0.657363
113	3.72172	0.608735	3.47948	0.700631	3.80981	0.746051	3.78779	0.671052	3.80981	0.789389	3.80981	0.681404	3.47948	0.657363
114	3.74374	0.608735	3.5015	0.700631	3.83183	0.746051	3.80981	0.671052	3.83183	0.789389	3.83183	0.681404	3.5015	0.657363
115	3.76577	0.608735	3.52352	0.700631	3.85385	0.746051	3.83183	0.671052	3.85385	0.789389	3.85385	0.681404	3.52352	0.657363
116	3.78779	0.608735	3.54555	0.700631	3.87588	0.746051	3.85385	0.671052	3.87588	0.789389	3.87588	0.681404	3.54555	0.657363
117	3.80981	0.608735	3.56757	0.700631	3.8979	0.746051	3.87588	0.671052	3.8979	0.789389	3.8979	0.681404	3.56757	0.657363
118	3.83183	0.608735	3.58959	0.700631	3.91992	0.746051	3.8979	0.671052	3.91992	0.789389	3.91992	0.681404	3.58959	0.657363
119	3.85385	0.608735	3.61161	0.700631	3.94194	0.746051	3.91992	0.671052	3.94194	0.789389	3.94194	0.681404	3.61161	0.657363
120	3.87588	0.608735	3.63363	0.700631	3.96396	0.746051	3.94194	0.671052	3.96396	0.789389	3.96396	0.681404	3.63363	0.657363
121	3.8979	0.608735	3.65566	0.700631	3.98599	0.746051	3.96396	0.671052	3.98599	0.789389	3.98599	0.681404	3.65566	0.657363
122	3.91992	0.608735	3.67768	0.700631	4.00801	0.746051	3.98599	0.671052	4.00801	0.789389	4.00801	0.681404	3.67768	0.657363
123	3.94194	0.608735	3.6997	0.700631	4.03003	0.746051	4.00801	0.671052	4.03003	0.789389	4.03003	0.681404	3.6997	0.657363
124	3.96396	0.608735	3.72172	0.700631	4.05205	0.746051	4.03003	0.671052	4.05205	0.789389	4.05205	0.681404	3.72172	0.657363
125	3.98599	0.608735	3.74374	0.700631	4.07407	0.746051	4.05205	0.671052	4.07407	0.789389	4.07407	0.681404	3.74374	0.657363
126	4.00801	0.608735	3.76577	0.700631	4.0961	0.746051	4.07407	0.671052	4.0961	0.789389	4.0961	0.681404	3.76577	0.657363
127	4.03003	0.608735	3.78779	0.700631	4.11812	0.746051	4.0961	0.671052	4.11812	0.789389	4.11812	0.681404	3.78779	0.657363
128	4.05205	0.608735	3.80981	0.700631	4.14014	0.746051	4.11812	0.671052	4.14014	0.789389	4.14014	0.681404	3.80981	0.657363
129	4.07407	0.608735	3.83183	0.700631	4.16216	0.746051	4.14014	0.671052	4.16216	0.789389	4.16216	0.681404	3.83183	0.657363
130	4.0961	0.608735	3.85385	0.700631	4.18418	0.746051	4.16216	0.671052	4.18418	0.789389	4.18418	0.681404	3.85385	0.657363
131	4.11812	0.608735	3.87588	0.700631	4.20621	0.746051	4.18418	0.671052	4.20621	0.789389	4.20621	0.681404	3.87588	0.657363
132	4.14014	0.608735	3.8979	0.700631	4.22823	0.746051	4.20621	0.671052	4.22823	0.789389	4.22823	0.681404	3.8979	0.657363
133	4.16216	0.608735	3.91992	0.700631	4.25025	0.746051	4.22823	0.671052	4.25025	0.789389	4.25025	0.681404	3.91992	0.657363
134	4.18418	0.608735	3.94194	0.700631	4.27227	0.746051	4.25025	0.671052	4.27227	0.789389	4.27227	0.681404	3.94194	0.657363
135	4.20621	0.608735	3.96396	0.700631	4.29429	0.746051	4.27227	0.671052	4.29429	0.789389	4.29429	0.681404	3.96396	0.657363
136	4.22823	0.608735	3.98599	0.700631	4.31632	0.746051	4.29429	0.671052	4.31632	0.789389	4.31632	0.681404	3.98599	0.657363
137	4.25025	0.608735	4.00801	0.700631	4.33834	0.746051	4.31632	0.671052	4.33834	0.789389	4.33834	0.681404	4.00801	0.657363
138	4.27227	0.608735	4.03003	0.700631	4.36036	0.746051	4.33834	0.671052	4.36036	0.789389	4.36036	0.681404	4.03003	0.657363
139	4.29429	0.608735	4.05205	0.700631	4.38238	0.746051	4.36036	0.671052	4.38238	0.789389	4.38238	0.681404	4.05205	0.657363
140	4.31632	0.608735	4.07407	0.700631	4.4044	0.746051	4.38238	0.671052	4.4044	0.789389	4.4044	0.681404	4.07407	0.657363
141	4.33834	0.608735	4.0961	0.700631	4.42643	0.746051	4.4044	0.671052	4.42643	0.789389	4.42643	0.681404	4.0961	0.657363
142	4.36036	0.608735	4.11812	0.700631	4.44845	0.746051	4.42643	0.671052	4.44845	0.789389	4.44845	0.681404	4.11812	0.657363
143	4.38238	0.608735	4.14014	0.700631	4.47047	0.746051	4.44845	0.671052	4.47047	0.789389	4.47047	0.681404	4.14014	0.657363
144	4.4044	0.608735	4.16216	0.700631	4.49249	0.746051	4.47047	0.671052	4.49249	0.789389	4.49249	0.681404	4.16216	0.657363
145	4.42643	0.608735	4.18418	0.700631	4.51451	0.746051	4.49249	0.671052	4.51451	0.789389	4.51451	0.681404	4.18418	0.657363
146	4.44845	0.608735	4.20621	0.700631	4.53654	0.746051	4.51451	0.671052	4.53654	0.789389	4.53654	0.681404	4.20621	0.657363
147	4.47047	0.608735	4.22823	0.700631	4.55856	0.746051	4.53654	0.671052	4.55856	0.789389	4.55856	0.681404	4.22823	0.657363
148	4.49249	0.608735	4.25025	0.700631	4.58058	0.746051	4.55856	0.671052	0.33033	0.771845	4.58058	0.681404	4.25025	0.657363
149	4.51451	0.608735	4.27227	0.700631	4.6026	0.746051	4.58058	0.671052	4.58058	0.760789	4.6026	0.681404	4.27227	0.657363
150	4.53654	0.608735	4.29429	0.700631	4.62462	0.746051	4.6026	0.671052	4.6026	0.760789	4.62462	0.681404	4.29429	0.657363
151	4.55856	0.608735	4.31632	0.700631	4.64665	0.746051	4.62462	0.671052	4.62462	0.760789	4.64665	0.681404	4.31632	0.657363
152	4.58058	0.608735	4.33834	0.700631	4.66867	0.746051	4.64665	0.671052	4.64665	0.760789	4.66867	0.681404	4.33834	0.657363
153	4.6026	0.608735	4.36036	0.700631	4.69069	0.746051	4.66867	0.671052	4.66867	0.760789	4.69069	0.681404	4.36036	0.657363
154	4.62462	0.608735	4.38238	0.700631	4.71271	0.746051	4.69069	0.671052	4.69069	0.760789	4.71271	0.681404	4.38238	0.657363
155	0.0660661	0.593987	4.4044	0.700631	4.73473	0.718776	4.71271	0.671052	4.71271	0.760789	4.73473	0.681404	4.4044	0.657363
156	0.0880881	0.593987	4.42643	0.700631	4.75676	0.718776	4.73473	0.671052	4.73473	0.760789	4.75676	0.681404	4.42643	0.657363
157	0.11011	0.593987	4.44845	0.700631	4.77878	0.718776	4.75676	0.671052	4.75676	0.760789	4.77878	0.681404	4.44845	0.657363
158	0.132132	0.593987	4.47047	0.700631	4.8008	0.718776	0.022022	0.667123	4.77878	0.760789	4.8008	0.681404	4.47047	0.657363
159	0.154154	0.593987	4.49249	0.700631	4.82282	0.718776	0.044044	0.667123	4.8008	0.760789	4.82282	0.681404	4.49249	0.657363
160	0.176176	0.593987	4.51451	0.700631	4.84484	0.718776	0.33033	0.658966	4.82282	0.760789	4.84484	0.681404	4.51451	0.657363
161	0.198198	0.593987	4.53654	0.700631	4.86687	0.718776	4.77878	0.655312	4.84484	0.760789	4.86687	0.681404	4.53654	0.657363
162	0.22022	0.593987	4.55856	0.700631	4.88889	0.718776	4.8008	0.655312	4.86687	0.760789	4.88889	0.681404	4.55856	0.657363
163	0.242242	0.593987	0.33033	0.676281	4.91091	0.718776	4.82282	0.655312	4.88889	0.760789	4.91091	0.681404	4.58058	0.657363
164	0.264264	0.593987	4.58058	0.652053	4.93293	0.718776	4.84484	0.655312	4.91091	0.760789	4.93293	0.681404	4.6026	0.657363
165	0.286286	0.593987	4.6026	0.652053	4.95495	0.718776	4.86687	0.655312	4.93293	0.760789	4.95495	0.681404	4.62462	0.657363
166	0.308308	0.593987	4.62462	0.652053	4.97698	0.718776	4.88889	0.655312	4.95495	0.760789	4.97698	0.681404	4.64665	0.657363
167	4.64665	0.570058	4.64665	0.652053	4.999	0.718776	4.91091	0.655312	4.97698	0.760789	4.999	0.681404	4.66867	0.657363
168	4.66867	0.570058	4.66867	0.652053	5.02102	0.718776	4.93293	0.655312	4.999	0.760789	5.02102	0.681404	4.69069	0.657363
169	4.69069	0.570058	4.69069	0.652053	5.04304	0.718776	4.95495	0.655312	5.02102	0.760789	5.04304	0.681404	4.71271	0.657363
170	4.71271	0.570058	4.71271	0.652053	5.06507	0.718776	4.97698	0.655312	5.04304	0.760789	5.06507	0.681404	4.73473	0.657363
171	4.73473	0.570058	4.73473	0.652053	5.08709	0.718776	4.999	0.655312	5.06507	0.760789	5.08709	0.681404	4.75676	0.657363
172	4.75676	0.570058	4.75676	0.652053	5.10911	0.718776	5.02102	0.655312	5.08709	0.760789	5.10911	0.681404	4.77878	0.657363
173	4.77878	0.570058	4.77878	0.652053	5.13113	0.718776	5.04304	0.655312	5.10911	0.760789	5.13113	0.681404	4.8008	0.657363
174	4.8008	0.570058	4.8008	0.652053	5.15315	0.718776	5.06507	0.655312	5.13113	0.760789	5.15315	0.681404	4.82282	0.657363
175	4.82282	0.570058	4.82282	0.652053	5.17518	0.718776	5.08709	0.655312	5.15315	0.760789	5.17518	0.681404	4.84484	0.657363
176	4.84484	0.570058	4.84484	0.652053	5.1972	0.718776	5.10911	0.655312	5.17518	0.760789	5.1972	0.681404	4.86687	0.657363
177	4.86687	0.570058	4.86687	0.652053	5.21922	0.718776	5.13113	0.655312	5.1972	0.760789	5.21922	0.681404	4.88889	0.657363
178	4.88889	0.570058	4.88889	0.652053	5.24124	0.718776	5.15315	0.655312	5.21922	0.760789	5.24124	0.681404	4.91091	0.657363
179	4.91091	0.570058	4.91091	0.652053	5.26326	0.718776	5.17518	0.655312	5.24124	0.760789	5.26326	0.681404	4.93293	0.657363
180	4.93293	0.570058	4.93293	0.652053	5.28529	0.718776	5.1972	0.655312	5.26326	0.760789	5.28529	0.681404	4.95495	0.657363
181	4.95495	0.570058	4.95495	0.652053	5.30731	0.718776	5.21922	0.655312	5.28529	0.760789	5.30731	0.681404	4.97698	0.657363
182	4.97698	0.570058	4.97698	0.652053	5.32933	0.718776	5.24124	0.655312	5.30731	0.760789	5.32933	0.681404	4.999	0.657363
183	4.999	0.570058	4.999	0.652053	5.35135	0.718776	5.26326	0.655312	5.32933	0.760789	5.35135	0.681404	5.02102	0.657363
184	5.02102	0.570058	5.02102	0.652053	5.37337	0.718776	5.28529	0.655312	5.35135	0.760789	5.37337	0.681404	5.04304	0.657363
185	5.04304	0.570058	5.04304	0.652053	5.3954	0.718776	5.30731	0.655312	0	0.727195	5.3954	0.681404	5.06507	0.657363
186	5.06507	0.570058	5.06507	0.652053	5.41742	0.718776	5.32933	0.655312	0.022022	0.727195	5.41742	0.681404	5.08709	0.657363
187	5.08709	0.570058	5.08709	0.652053	5.43944	0.718776	5.35135	0.655312	0.044044	0.727195	5.43944	0.681404	5.10911	0.657363
188	5.10911	0.570058	5.10911	0.652053	5.46146	0.718776	5.37337	0.655312	0.792793	0.717912	5.46146	0.681404	5.13113	0.657363
189	5.13113	0.570058	5.13113	0.652053	5.48348	0.718776	5.3954	0.655312	0.814815	0.717912	5.48348	0.681404	5.15315	0.657363
190	5.15315	0.570058	5.15315	0.652053	5.50551	0.718776	5.41742	0.655312	0.836837	0.717912	5.50551	0.681404	5.17518	0.657363
191	5.17518	0.570058	5.17518	0.652053	5.52753	0.718776	5.43944	0.655312	0.858859	0.717912	5.52753	0.681404	5.1972	0.657363
192	5.1972	0.570058	5.1972	0.652053	5.54955	0.718776	5.46146	0.655312	0.880881	0.717912	5.54955	0.681404	5.21922	0.657363
193	5.21922	0.570058	5.21922	0.652053	5.57157	0.718776	5.48348	0.655312	0.902903	0.717912	5.57157	0.681404	5.24124	0.657363
194	5.24124	0.570058	5.24124	0.652053	5.59359	0.718776	5.50551	0.655312	0.924925	0.717912	5.59359	0.681404	5.26326	0.657363
195	5.26326	0.570058	5.26326	0.652053	5.61562	0.718776	5.52753	0.655312	0.946947	0.717912	5.61562	0.681404	5.28529	0.657363
196	5.28529	0.570058	5.28529	0.652053	5.63764	0.718776	5.54955	0.655312	0.968969	0.717912	5.63764	0.681404	5.30731	0.657363
197	5.30731	0.570058	5.30731	0.652053	5.65966	0.718776	5.57157	0.655312	0.990991	0.717912	5.65966	0.681404	5.32933	0.657363
198	5.32933	0.570058	5.32933	0.652053	5.68168	0.718776	5.59359	0.655312	1.01301	0.717912	5.68168	0.681404	5.35135	0.657363
199	5.35135	0.570058	5.35135	0.652053	5.7037	0.718776	5.61562	0.655312	1.03504	0.717912	5.7037	0.681404	5.37337	0.657363
200	5.37337	0.570058	5.37337	0.652053	5.72573	0.718776	5.63764	0.655312	1.05706	0.717912	5.72573	0.681404	5.3954	0.657363
201	5.3954	0.570058	5.3954	0.652053	5.74775	0.718776	5.65966	0.655312	1.07908	0.717912	5.74775	0.681404	5.41742	0.657363
202	5.41742	0.570058	5.41742	0.652053	5.76977	0.718776	5.68168	0.655312	1.1011	0.717912	5.76977	0.681404	5.43944	0.657363
203	5.43944	0.570058	5.43944	0.652053	5.79179	0.718776	5.7037	0.655312	1.12312	0.717912	5.79179	0.681404	5.46146	0.657363
204	5.46146	0.570058	5.46146	0.652053	5.81381	0.718776	5.72573	0.655312	1.14515	0.717912	5.81381	0.681404	5.48348	0.657363
205	5.48348	0.570058	5.48348	0.652053	5.83584	0.718776	5.74775	0.655312	1.16717	0.717912	5.83584	0.681404	5.50551	0.657363
206	5.50551	0.570058	5.50551	0.652053	5.85786	0.718776	5.76977	0.655312	1.18919	0.717912	5.85786	0.681404	5.52753	0.657363
207	5.52753	0.570058	5.52753	0.652053	5.87988	0.718776	5.79179	0.655312	1.21121	0.717912	5.87988	0.681404	5.54955	0.657363
208	5.54955	0.570058	5.54955	0.652053	5.9019	0.718776	5.81381	0.655312	1.23323	0.717912	5.9019	0.681404	5.57157	0.657363
209	5.57157	0.570058	5.57157	0.652053	5.92392	0.718776	5.83584	0.655312	1.25526	0.717912	5.92392	0.681404	5.59359	0.657363
210	5.59359	0.570058	5.59359	0.652053	5.94595	0.718776	5.85786	0.655312	1.27728	0.717912	5.94595	0.681404	5.61562	0.657363
211	5.61562	0.570058	5.61562	0.652053	5.96797	0.718776	5.87988	0.655312	1.2993	0.717912	5.96797	0.681404	5.63764	0.657363
212	5.63764	0.570058	5.63764	0.652053	5.98999	0.718776	5.9019	0.655312	1.32132	0.717912	5.98999	0.681404	5.65966	0.657363
213	5.65966	0.570058	5.65966	0.652053	6.01201	0.718776	5.92392	0.655312	5.37337	0.716403	6.01201	0.681404	5.68168	0.657363
214	5.68168	0.570058	5.68168	0.652053	6.03403	0.718776	5.94595	0.655312	5.3954	0.716403	6.03403	0.681404	5.7037	0.657363
215	5.7037	0.570058	5.7037	0.652053	6.05606	0.718776	5.96797	0.655312	5.41742	0.716403	6.05606	0.681404	5.72573	0.657363
216	5.72573	0.570058	5.72573	0.652053	6.07808	0.718776	5.98999	0.655312	5.43944	0.716403	6.07808	0.681404	5.74775	0.657363
217	5.74775	0.570058	5.74775	0.652053	6.1001	0.718776	6.01201	0.655312	5.46146	0.716403	6.1001	0.681404	5.76977	0.657363
218	5.76977	0.570058	5.76977	0.652053	6.12212	0.718776	6.03403	0.655312	5.48348	0.716403	6.12212	0.681404	5.79179	0.657363
219	5.79179	0.570058	5.79179	0.652053	6.14414	0.718776	6.05606	0.655312	5.50551	0.716403	6.14414	0.681404	5.81381	0.657363
220	5.81381	0.570058	5.81381	0.652053	6.16617	0.718776	6.07808	0.655312	5.52753	0.716403	6.16617	0.681404	5.83584	0.657363
221	5.83584	0.570058	5.83584	0.652053	6.18819	0.718776	6.1001	0.655312	5.54955	0.716403	6.18819	0.681404	5.85786	0.657363
222	5.85786	0.570058	5.85786	0.652053	6.21021	0.718776	6.12212	0.655312	5.57157	0.716403	6.21021	0.681404	5.87988	0.657363
223	5.87988	0.570058	5.87988	0.652053	6.23223	0.718776	6.14414	0.655312	5.59359	0.716403	6.23223	0.681404	5.9019	0.657363
224	5.9019	0.570058	5.9019	0.652053	6.25425	0.718776	6.16617	0.655312	5.61562	0.716403	6.25425	0.681404	5.92392	0.657363
225	5.92392	0.570058	5.92392	0.652053	6.27628	0.718776	6.18819	0.655312	5.63764	0.716403	6.27628	0.681404	5.94595	0.657363
226	5.94595	0.570058	5.94595	0.652053	6.2983	0.718776	6.21021	0.655312	5.65966	0.716403	6.2983	0.681404	5.96797	0.657363
227	5.96797	0.570058	5.96797	0.652053	6.32032	0.718776	6.23223	0.655312	5.68168	0.716403	6.32032	0.681404	0.33033	0.637169
228	5.98999	0.570058	5.98999	0.652053	6.34234	0.718776	6.25425	0.655312	5.7037	0.716403	6.34234	0.681404	5.98999	0.624444
229	6.01201	0.570058	6.01201	0.652053	6.36436	0.718776	6.27628	0.655312	5.72573	0.716403	6.36436	0.681404	6.01201	0.624444
230	6.03403	0.570058	6.03403	0.652053	6.38639	0.718776	6.2983	0.655312	5.74775	0.716403	6.38639	0.681404	6.03403	0.624444
231	6.05606	0.570058	6.05606	0.652053	6.40841	0.718776	6.32032	0.655312	5.76977	0.716403	6.40841	0.681404	6.05606	0.624444
[truncated: 769 more rows]
